# Supplementary material for: Nongenetic Evolution Drives Lung Adenocarcinoma Spatial Heterogeneity and Progression
Source: Oxford University Press journal article supplement (doi:10.1158/2159-8290.cd-20-1274), 2021-02-09
Supplement: 21598290cd201274-sup-250305_2_supp_6853943_qn4tzl.xlsx [file 21598290cd201274-sup-250305_2_supp_6853943_qn4tzl.xlsx]

## Sheet: Table legend
Supplementary Table 8. Gene ontology categories showing significant enrichment of cancer-specific solid and lepidic markers.

## Sheet: Solid markers enrichment
Gene Set Name	# Genes in Gene Set (K)	Description	# Genes in Overlap (k)	k/K	p-value	FDR q-value
SHEDDEN_LUNG_CANCER_POOR_SURVIVAL_A6	460	Cluster 6 of method A: up-regulation of these genes in patients with non-small cell lung cancer (NSCLC) predicts poor survival outcome.	9	0.0196	8.33e-13	9.33e-10
FISCHER_G2_M_CELL_CYCLE	236	Cell cycle genes with peak expression in G2/M check point.	7	0.0297	2.44e-11	1.64e-08
GO_OXIDOREDUCTASE_ACTIVITY	751	Catalysis of an oxidation-reduction (redox) reaction, a reversible chemical reaction in which the oxidation state of an atom or atoms within a molecule is altered. One substrate acts as a hydrogen or electron donor and becomes oxidized, while the other acts as hydrogen or electron acceptor and becomes reduced. [GOC:go_curators]	6	0.008	1.81e-06	0.0126
GO_ZYMOGEN_ACTIVATION	58	The proteolytic processing of an inactive enzyme to an active form. [GOC:hjd]	3	0.0517	3.76e-06	0.0126
GO_CELLULAR_RESPONSE_TO_DNA_DAMAGE_STIMULUS	865	Any process that results in a change in state or activity of a cell (in terms of movement, secretion, enzyme production, gene expression, etc.) as a result of a stimulus indicating damage to its DNA from environmental insults or errors during metabolism. [GOC:go_curators]	6	0.0069	4.09e-06	0.0126
GO_OXIDATION_REDUCTION_PROCESS	1014	A metabolic process that results in the removal or addition of one or more electrons to or from a substance, with or without the concomitant removal or addition of a proton or protons. [GOC:dhl, GOC:ecd, GOC:jh2, GOC:jid, GOC:mlg, GOC:rph]	6	0.0059	1.01e-05	0.0233
GO_MITOTIC_CELL_CYCLE	1053	Progression through the phases of the mitotic cell cycle, the most common eukaryotic cell cycle, which canonically comprises four successive phases called G1, S, G2, and M and includes replication of the genome and the subsequent segregation of chromosomes into daughter cells. In some variant cell cycles nuclear replication or nuclear division may not be followed by cell division, or G1 and G2 ph…	6	0.0057	1.26e-05	0.0233
GO_NEGATIVE_REGULATION_OF_CELL_CYCLE	637	Any process that stops, prevents or reduces the rate or extent of progression through the cell cycle. [GOC:dph, GOC:go_curators, GOC:tb]	5	0.0078	1.65e-05	0.0233
GO_REGULATION_OF_CELL_DEATH	1746	Any process that modulates the rate or frequency of cell death. Cell death is the specific activation or halting of processes within a cell so that its vital functions markedly cease, rather than simply deteriorating gradually over time, which culminates in cell death. [GOC:dph, GOC:tb]	7	0.004	2e-05	0.0233
GO_TISSUE_MORPHOGENESIS	664	The process in which the anatomical structures of a tissue are generated and organized. [GOC:dph, GOC:jid]	5	0.0075	2.01e-05	0.0233
GO_PROTEOLYSIS	1809	The hydrolysis of proteins into smaller polypeptides and/or amino acids by cleavage of their peptide bonds. [GOC:bf, GOC:mah]	7	0.0039	2.51e-05	0.0246
GO_REGULATION_OF_CELL_CYCLE	1226	Any process that modulates the rate or extent of progression through the cell cycle. [GOC:ai, GOC:dph, GOC:tb]	6	0.0049	2.96e-05	0.0246
GO_RESPONSE_TO_ABIOTIC_STIMULUS	1237	Any process that results in a change in state or activity of a cell or an organism (in terms of movement, secretion, enzyme production, gene expression, etc.) as a result of an abiotic (not derived from living organisms) stimulus. [GOC:hb]	6	0.0049	3.12e-05	0.0246
GO_MEIOSIS_I_CELL_CYCLE_PROCESS	124	A process that contributes to the first meiotic division. The first meiotic division is the reductive division resulting in the separation of homologous chromosome pairs. [PMID:29385397]	3	0.0242	3.69e-05	0.0246
GO_IDENTICAL_PROTEIN_BINDING	1926	Interacting selectively and non-covalently with an identical protein or proteins. [GOC:jl]	7	0.0036	3.76e-05	0.0246
GO_FORMATION_OF_PRIMARY_GERM_LAYER	127	The formation of the ectoderm, mesoderm and endoderm during gastrulation. [GOC:go_curators]	3	0.0236	3.97e-05	0.0246
GO_STRIATUM_DEVELOPMENT	18	The progression of the striatum over time from its initial formation until its mature state. The striatum is a region of the forebrain consisting of the caudate nucleus, putamen and fundus striati. [GO_REF:0000021, GOC:cls, GOC:dgh, GOC:dph, GOC:jid, ISBN:0878937420]	2	0.1111	3.98e-05	0.0246
GO_APOPTOTIC_PROCESS	1994	A programmed cell death process which begins when a cell receives an internal (e.g. DNA damage) or external signal (e.g. an extracellular death ligand), and proceeds through a series of biochemical events (signaling pathway phase) which trigger an execution phase. The execution phase is the last step of an apoptotic process, and is typically characterized by rounding-up of the cell, retraction of…	7	0.0035	4.69e-05	0.0272
GO_FEMALE_GAMETE_GENERATION	142	Generation of the female gamete; specialised haploid cells produced by meiosis and along with a male gamete takes part in sexual reproduction. [GOC:dph, ISBN:0198506732]	3	0.0211	5.53e-05	0.0302
GO_NEGATIVE_REGULATION_OF_CHROMOSOME_ORGANIZATION	148	Any process that stops, prevents or reduces the frequency, rate or extent of chromosome organization. [GOC:obol]	3	0.0203	6.25e-05	0.0314
GO_PLASMINOGEN_ACTIVATION	23	The process in which inactive plasminogen is processed to active plasmin. This process includes cleavage at an internal Arg-Val site to form an N-terminal A-chain and C-terminal B-chain held together by a disulfide bond, and can include further proteolytic cleavage events to remove the preactivation peptide. [PMID:9548733]	2	0.087	6.57e-05	0.0314
GO_CELL_CYCLE_PROCESS	1422	The cellular process that ensures successive accurate and complete genome replication and chromosome segregation. [GOC:isa_complete, GOC:mtg_cell_cycle]	6	0.0042	6.78e-05	0.0314
GO_SUBPALLIUM_DEVELOPMENT	24	The process whose specific outcome is the progression of the subpallium over time, from its formation to the mature structure. The subpallium is the base region of the telencephalon. [GO_REF:0000021, GOC:cls, GOC:dgh, GOC:dph, GOC:jid, PMID:12626695]	2	0.0833	7.17e-05	0.0316
GO_MULTICELLULAR_ORGANISM_REPRODUCTION	876	The biological process in which new individuals are produced by one or two multicellular organisms. The new individuals inherit some proportion of their genetic material from the parent or parents. [GOC:isa_complete, GOC:jid]	5	0.0057	7.51e-05	0.0316
GO_POSITIVE_REGULATION_OF_DEVELOPMENTAL_PROCESS	1466	Any process that activates or increases the rate or extent of development, the biological process whose specific outcome is the progression of an organism over time from an initial condition (e.g. a zygote, or a young adult) to a later condition (e.g. a multicellular animal or an aged adult). [GOC:ai]	6	0.0041	8.02e-05	0.032
GO_FIBRINOLYSIS	26	A process that solubilizes fibrin in the bloodstream of a multicellular organism, chiefly by the proteolytic action of plasmin. [GOC:jl, PMID:15842654]	2	0.0769	8.44e-05	0.032
GO_NUCLEOBASE_CONTAINING_SMALL_MOLECULE_INTERCONVERSION	27	The chemical reactions and pathways by which a nucleobase, nucleoside or nucleotide small molecule is synthesized from another nucleobase, nucleoside or nucleotide small molecule. [GOC:mah, ISBN:0306444747, ISBN:0471394831]	2	0.0741	9.11e-05	0.032
GO_REPRODUCTION	1502	The production of new individuals that contain some portion of genetic material inherited from one or more parent organisms. [GOC:go_curators, GOC:isa_complete, GOC:jl, ISBN:0198506732]	6	0.004	9.17e-05	0.032
GO_ORGANELLE_FISSION	467	The creation of two or more organelles by division of one organelle. [GOC:jid]	4	0.0086	9.31e-05	0.032
GO_REGULATION_OF_B_CELL_DIFFERENTIATION	29	Any process that modulates the frequency, rate or extent of B cell differentiation. [GOC:go_curators]	2	0.069	0.000105	0.0349
GO_FEMALE_MEIOTIC_NUCLEAR_DIVISION	31	A cell cycle process by which the cell nucleus divides as part of a meiotic cell cycle in the female germline. [GOC:dph, GOC:ems, GOC:mah, GOC:vw]	2	0.0645	0.000121	0.0385
GO_REGULATION_OF_NUCLEAR_DIVISION	188	Any process that modulates the frequency, rate or extent of nuclear division, the partitioning of the nucleus and its genetic information. [GOC:ai]	3	0.016	0.000127	0.0386
GO_GASTRULATION	189	A complex and coordinated series of cellular movements that occurs at the end of cleavage during embryonic development of most animals. The details of gastrulation vary from species to species, but usually result in the formation of the three primary germ layers, ectoderm, mesoderm and endoderm. [GOC:curators, ISBN:9780878933846]	3	0.0159	0.000129	0.0386
GO_MEIOTIC_CELL_CYCLE_PROCESS	193	A process that is part of the meiotic cell cycle. [GO_REF:0000060, GOC:mtg_cell_cycle, GOC:TermGenie]	3	0.0155	0.000137	0.0396
GO_SISTER_CHROMATID_SEGREGATION	196	The cell cycle process in which sister chromatids are organized and then physically separated and apportioned to two or more sets. [GOC:ai, GOC:elh]	3	0.0153	0.000144	0.0396
GO_POSITIVE_REGULATION_OF_ERYTHROCYTE_DIFFERENTIATION	34	Any process that activates or increases the frequency, rate or extent of erythrocyte differentiation. [GOC:go_curators]	2	0.0588	0.000145	0.0396
GO_PROTEIN_DIMERIZATION_ACTIVITY	1023	The formation of a protein dimer, a macromolecular structure consists of two noncovalently associated identical or nonidentical subunits. [ISBN:0198506732]	5	0.0049	0.000155	0.0397
GO_SIGNALING_RECEPTOR_BINDING	1654	Interacting selectively and non-covalently with one or more specific sites on a receptor molecule, a macromolecule that undergoes combination with a hormone, neurotransmitter, drug or intracellular messenger to initiate a change in cell function. [GOC:bf, GOC:ceb, ISBN:0198506732]	6	0.0036	0.000156	0.0397
GO_POSITIVE_REGULATION_OF_HEMOPOIESIS	204	Any process that activates or increases the frequency, rate or extent of hemopoiesis. [GO_REF:0000058, GOC:pad, GOC:PARL, GOC:TermGenie, PMID:20080761]	3	0.0147	0.000162	0.0397
GO_POSITIVE_REGULATION_OF_CELL_DIFFERENTIATION	1033	Any process that activates or increases the frequency, rate or extent of cell differentiation. [GOC:go_curators]	5	0.0048	0.000163	0.0397
GO_RESPONSE_TO_MECHANICAL_STIMULUS	209	Any process that results in a change in state or activity of a cell or an organism (in terms of movement, secretion, enzyme production, gene expression, etc.) as a result of a mechanical stimulus. [GOC:hb]	3	0.0144	0.000174	0.0413
GO_EMBRYO_DEVELOPMENT	1066	The process whose specific outcome is the progression of an embryo from its formation until the end of its embryonic life stage. The end of the embryonic stage is organism-specific. For example, for mammals, the process would begin with zygote formation and end with birth. For insects, the process would begin at zygote formation and end with larval hatching. For plant zygotic embryos, this would …	5	0.0047	0.000188	0.0425
GO_REGULATION_OF_CELL_SUBSTRATE_ADHESION	217	Any process that modulates the frequency, rate or extent of cell-substrate adhesion. Cell-substrate adhesion is the attachment of a cell to the underlying substrate via adhesion molecules. [GOC:dph, GOC:pf, GOC:tb]	3	0.0138	0.000194	0.0425
GO_CELLULAR_COMPONENT_DISASSEMBLY	569	A cellular process that results in the breakdown of a cellular component. [GOC:isa_complete]	4	0.007	0.000199	0.0425
GO_POSITIVE_REGULATION_OF_MULTI_ORGANISM_PROCESS	40	Any process that activates or increases the frequency, rate or extent of a multi-organism process, a process in which an organism has an effect on another organism of the same or different species. [GOC:jl]	2	0.05	0.000202	0.0425
GO_TRANSITION_METAL_ION_BINDING	1082	Interacting selectively and non-covalently with a transition metal ions; a transition metal is an element whose atom has an incomplete d-subshell of extranuclear electrons, or which gives rise to a cation or cations with an incomplete d-subshell. Transition metals often have more than one valency state. Biologically relevant transition metals include vanadium, manganese, iron, copper, cobalt, nic…	5	0.0046	0.000202	0.0425
GO_PROTEIN_PROCESSING	223	Any protein maturation process achieved by the cleavage of a peptide bond or bonds within a protein. Protein maturation is the process leading to the attainment of the full functional capacity of a protein. [GOC:curators, GOC:jl, GOC:jsg]	3	0.0135	0.00021	0.0427
GO_DISULFIDE_OXIDOREDUCTASE_ACTIVITY	41	Catalysis of the reaction: substrate with reduced sulfide groups = substrate with oxidized disulfide bonds. [MetaCyc:DISULFOXRED-RXN]	2	0.0488	0.000212	0.0427
GO_CELL_MATRIX_ADHESION	230	The binding of a cell to the extracellular matrix via adhesion molecules. [GOC:hb]	3	0.013	0.00023	0.0454
GO_MULTI_ORGANISM_PROCESS	1123	A biological process which involves another organism of the same or different species. [GOC:jl]	5	0.0045	0.00024	0.046
GO_EMBRYONIC_MORPHOGENESIS	602	The process in which anatomical structures are generated and organized during the embryonic phase. The embryonic phase begins with zygote formation. The end of the embryonic phase is organism-specific. For example, it would be at birth for mammals, larval hatching for insects and seed dormancy in plants. [GOC:jid, GOC:mtg_sensu]	4	0.0066	0.000246	0.046
GO_CELL_DIVISION	603	The process resulting in division and partitioning of components of a cell to form more cells; may or may not be accompanied by the physical separation of a cell into distinct, individually membrane-bounded daughter cells. [GOC:di, GOC:go_curators, GOC:pr]	4	0.0066	0.000248	0.046
GO_DNA_PACKAGING	240	Any process in which DNA and associated proteins are formed into a compact, orderly structure. [GOC:mah, ISBN:0815316194]	3	0.0125	0.000261	0.0474
GO_ENDODERMAL_CELL_DIFFERENTIATION	46	The process in which a relatively unspecialized cell acquires the specialized features of an endoderm cell, a cell of the inner of the three germ layers of the embryo. [CL:0000223, GOC:yaf, PMID:17624332]	2	0.0435	0.000267	0.0476
GO_CHROMOSOME_CONDENSATION	47	The progressive compaction of dispersed interphase chromatin into threadlike chromosomes prior to mitotic or meiotic nuclear division, or during apoptosis, in eukaryotic cells. [GOC:mah, ISBN:0815316194]	2	0.0426	0.000279	0.0479
GO_COLLAGEN_CATABOLIC_PROCESS	47	The proteolytic chemical reactions and pathways resulting in the breakdown of collagen in the extracellular matrix, usually carried out by proteases secreted by nearby cells. [GOC:mah, ISBN:0815316194]	2	0.0426	0.000279	0.0479

## Sheet: Lepidic markers enrichment
Gene Set Name	# Genes in Gene Set (K)	Description	# Genes in Overlap (k)	k/K	p-value	FDR q-value
SHEDDEN_LUNG_CANCER_GOOD_SURVIVAL_A4	197	Cluster 4 of method A: up-regulation of these genes in patients with non-small cell lung cancer (NSCLC) predicts good survival outcome.	8	0.0406	7.96e-12	2.32e-08
GO_EMBRYO_DEVELOPMENT	1066	The process whose specific outcome is the progression of an embryo from its formation until the end of its embryonic life stage. The end of the embryonic stage is organism-specific. For example, for mammals, the process would begin with zygote formation and end with birth. For insects, the process would begin at zygote formation and end with larval hatching. For plant zygotic embryos, this would …	9	0.0084	3.18e-07	0.00295
GO_CELL_SUBSTRATE_ADHESION	359	The attachment of a cell to the underlying substrate via adhesion molecules. [GOC:mah, GOC:pf]	6	0.0167	7.7e-07	0.003
GO_LEFT_RIGHT_PATTERN_FORMATION	22	The pattern specification process that results in the subdivision of the left/right axis in space to define an area or volume in which specific patterns of cell differentiation will take place or in which cells interpret a specific environment. [GOC:mtg_heart]	3	0.1364	1.01e-06	0.003
GO_REGULATION_OF_CELL_SUBSTRATE_ADHESION	217	Any process that modulates the frequency, rate or extent of cell-substrate adhesion. Cell-substrate adhesion is the attachment of a cell to the underlying substrate via adhesion molecules. [GOC:dph, GOC:pf, GOC:tb]	5	0.023	1.46e-06	0.003
GO_EMBRYO_DEVELOPMENT_ENDING_IN_BIRTH_OR_EGG_HATCHING	663	The process whose specific outcome is the progression of an embryo over time, from zygote formation until the end of the embryonic life stage. The end of the embryonic life stage is organism-specific and may be somewhat arbitrary; for mammals it is usually considered to be birth, for insects the hatching of the first instar larva from the eggshell. [GOC:go_curators, GOC:isa_complete, GOC:mtg_sens…	7	0.0106	1.81e-06	0.003
GO_CELL_MATRIX_ADHESION	230	The binding of a cell to the extracellular matrix via adhesion molecules. [GOC:hb]	5	0.0217	1.94e-06	0.003
GO_POSITIVE_REGULATION_OF_CELL_SUBSTRATE_ADHESION	122	Any process that increases the frequency, rate or extent of cell-substrate adhesion. Cell-substrate adhesion is the attachment of a cell to the underlying substrate via adhesion molecules. [GOC:dph, GOC:pf, GOC:tb]	4	0.0328	4.47e-06	0.00456
GO_ACTIN_MEDIATED_CELL_CONTRACTION	123	The actin filament-based process in which cytoplasmic actin filaments slide past one another resulting in contraction of all or part of the cell body. [GOC:mah]	4	0.0325	4.61e-06	0.00456
GO_BIOLOGICAL_ADHESION	1481	The attachment of a cell or organism to a substrate, another cell, or other organism. Biological adhesion includes intracellular attachment between membrane regions. [GOC:isa_complete]	9	0.0061	4.79e-06	0.00456
GO_REGULATION_OF_CELL_MATRIX_ADHESION	125	Any process that modulates the frequency, rate or extent of attachment of a cell to the extracellular matrix. [GOC:hjd]	4	0.032	4.92e-06	0.00456
GO_ACTIN_FILAMENT_BASED_PROCESS	804	Any cellular process that depends upon or alters the actin cytoskeleton, that part of the cytoskeleton comprising actin filaments and their associated proteins. [GOC:mah]	7	0.0087	6.41e-06	0.00507
GO_TUBE_DEVELOPMENT	1148	The process whose specific outcome is the progression of a tube over time, from its initial formation to a mature structure. Epithelial and endothelial tubes transport gases, liquids and cells from one site to another and form the basic structure of many organs and tissues including lung and trachea, kidney, the mammary gland, the vascular system and the gastrointestinal and urinary-genital tract…	8	0.007	6.57e-06	0.00507
GO_CIRCULATORY_SYSTEM_DEVELOPMENT	1196	The process whose specific outcome is the progression of the circulatory system over time, from its formation to the mature structure. The circulatory system is the organ system that passes nutrients (such as amino acids and electrolytes), gases, hormones, blood cells, etc. to and from cells in the body to help fight diseases and help stabilize body temperature and pH to maintain homeostasis. [GO…	8	0.0067	8.85e-06	0.00575
GO_ANATOMICAL_STRUCTURE_FORMATION_INVOLVED_IN_MORPHOGENESIS	1202	The developmental process pertaining to the initial formation of an anatomical structure from unspecified parts. This process begins with the specific processes that contribute to the appearance of the discrete structure and ends when the structural rudiment is recognizable. An anatomical structure is any biological entity that occupies space and is distinguished from its surroundings. Anatomical…	8	0.0067	9.18e-06	0.00575
GO_MORPHOGENESIS_OF_AN_EPITHELIUM	554	The process in which the anatomical structures of epithelia are generated and organized. An epithelium consists of closely packed cells arranged in one or more layers, that covers the outer surfaces of the body or lines any internal cavity or tube. [GOC:dph, GOC:jl, GOC:tb, ISBN:0198506732]	6	0.0108	9.31e-06	0.00575
GO_ACTIN_FILAMENT_BASED_MOVEMENT	153	Movement of organelles or other particles along actin filaments, or sliding of actin filaments past each other, mediated by motor proteins. [GOC:BHF, GOC:mah]	4	0.0261	1.09e-05	0.00634
GO_REGIONALIZATION	355	The pattern specification process that results in the subdivision of an axis or axes in space to define an area or volume in which specific patterns of cell differentiation will take place or in which cells interpret a specific environment. [GOC:dph, GOC:isa_complete]	5	0.0141	1.6e-05	0.00825
GO_POSITIVE_REGULATION_OF_PROTEIN_METABOLIC_PROCESS	1732	Any process that activates or increases the frequency, rate or extent of the chemical reactions and pathways involving a protein. [GOC:ai]	9	0.0052	1.68e-05	0.00825
GO_POSITIVE_REGULATION_OF_CELL_MATRIX_ADHESION	55	Any process that activates or increases the rate or extent of cell adhesion to an extracellular matrix. [GOC:hjd]	3	0.0545	1.69e-05	0.00825
GO_EPITHELIUM_DEVELOPMENT	1329	The process whose specific outcome is the progression of an epithelium over time, from its formation to the mature structure. An epithelium is a tissue that covers the internal or external surfaces of an anatomical structure. [GOC:dph, GOC:mtg_lung]	8	0.006	1.9e-05	0.00838
GO_TUBE_MORPHOGENESIS	951	The process in which the anatomical structures of a tube are generated and organized. Epithelial and endothelial tubes transport gases, liquids and cells from one site to another and form the basic structure of many organs and tissues, with tube shape and organization varying from the single-celled excretory organ in Caenorhabditis elegans to the branching trees of the mammalian kidney and insect…	7	0.0074	1.9e-05	0.00838
GO_IN_UTERO_EMBRYONIC_DEVELOPMENT	383	The process whose specific outcome is the progression of the embryo in the uterus over time, from formation of the zygote in the oviduct, to birth. An example of this process is found in Mus musculus. [GOC:go_curators, GOC:mtg_sensu]	5	0.0131	2.3e-05	0.00967
GO_CELL_MOTILITY	1819	Any process involved in the controlled self-propelled movement of a cell that results in translocation of the cell from one place to another. [GOC:dgh, GOC:dph, GOC:isa_complete, GOC:mlg]	9	0.0049	2.48e-05	0.00997
GO_TISSUE_MORPHOGENESIS	664	The process in which the anatomical structures of a tissue are generated and organized. [GOC:dph, GOC:jid]	6	0.009	2.58e-05	0.00997
GO_CYTOSKELETON_ORGANIZATION	1396	A process that is carried out at the cellular level which results in the assembly, arrangement of constituent parts, or disassembly of cytoskeletal structures. [GOC:dph, GOC:jl, GOC:mah]	8	0.0057	2.7e-05	0.00999
GO_POSITIVE_REGULATION_OF_PEROXISOME_PROLIFERATOR_ACTIVATED_RECEPTOR_SIGNALING_PATHWAY	9	Any process that activates or increases the frequency, rate or extent of the peroxisome proliferator activated receptor signaling pathway. [GOC:bf]	2	0.2222	2.81e-05	0.01
GO_POSITIVE_REGULATION_OF_DEVELOPMENTAL_PROCESS	1466	Any process that activates or increases the rate or extent of development, the biological process whose specific outcome is the progression of an organism over time from an initial condition (e.g. a zygote, or a young adult) to a later condition (e.g. a multicellular animal or an aged adult). [GOC:ai]	8	0.0055	3.82e-05	0.0129
GO_POSITIVE_REGULATION_OF_CELL_ADHESION	428	Any process that activates or increases the frequency, rate or extent of cell adhesion. [GOC:go_curators]	5	0.0117	3.9e-05	0.0129
GO_ACTIN_FILAMENT_ORGANIZATION	433	A process that is carried out at the cellular level which results in the assembly, arrangement of constituent parts, or disassembly of cytoskeletal structures comprising actin filaments. Includes processes that control the spatial distribution of actin filaments, such as organizing filaments into meshworks, bundles, or other structures, as by cross-linking. [GOC:mah]	5	0.0115	4.12e-05	0.0132
GO_REGULATION_OF_CELL_ADHESION	736	Any process that modulates the frequency, rate or extent of attachment of a cell to another cell or to the extracellular matrix. [GOC:mah]	6	0.0082	4.58e-05	0.0142
GO_EMBRYONIC_ORGAN_DEVELOPMENT	451	Development, taking place during the embryonic phase, of a tissue or tissues that work together to perform a specific function or functions. Development pertains to the process whose specific outcome is the progression of a structure over time, from its formation to the mature structure. Organs are commonly observed as visibly distinct structures, but may also exist as loosely associated clusters…	5	0.0111	4.99e-05	0.0147
GO_PATTERN_SPECIFICATION_PROCESS	455	Any developmental process that results in the creation of defined areas or spaces within an organism to which cells respond and eventually are instructed to differentiate. [GOC:go_curators, GOC:isa_complete, ISBN:0521436125]	5	0.011	5.21e-05	0.0147
GO_EMBRYONIC_HEART_TUBE_DEVELOPMENT	80	The process whose specific outcome is the progression of the embryonic heart tube over time, from its formation to the mature structure. The heart tube forms as the heart rudiment from the heart field. [GOC:go_curators]	3	0.0375	5.22e-05	0.0147
GO_DEVELOPMENTAL_GROWTH_INVOLVED_IN_MORPHOGENESIS	236	The increase in size or mass of an anatomical structure that contributes to the structure attaining its shape. [GOC:dph]	4	0.0169	5.96e-05	0.0161
GO_REGULATION_OF_CELLULAR_COMPONENT_MOVEMENT	1142	Any process that modulates the frequency, rate or extent of the movement of a cellular component. [GOC:ai, GOC:dph, GOC:jl]	7	0.0061	6.07e-05	0.0161
GO_AXIS_SPECIFICATION	88	The establishment, maintenance and elaboration of a pattern along a line or around a point. [GOC:dph, GOC:go_curators, GOC:isa_complete]	3	0.0341	6.93e-05	0.0173
GO_LEFT_RIGHT_AXIS_SPECIFICATION	14	The establishment, maintenance and elaboration of the left/right axis. The left/right axis is defined by a line that runs orthogonal to both the anterior/posterior and dorsal/ventral axes. Each side is defined from the viewpoint of the organism rather of the observer (as per anatomical axes). [GOC:dph, GOC:gvg, GOC:mah]	2	0.1429	7.09e-05	0.0173
GO_REGULATION_OF_PEROXISOME_PROLIFERATOR_ACTIVATED_RECEPTOR_SIGNALING_PATHWAY	14	Any process that modulates the frequency, rate or extent of the peroxisome proliferator activated receptor signaling pathway. [GOC:bf]	2	0.1429	7.09e-05	0.0173
GO_RESPONSE_TO_TRANSFORMING_GROWTH_FACTOR_BETA	258	Any process that results in a change in state or activity of a cell or an organism (in terms of movement, secretion, enzyme production, gene expression, etc.) as a result of a transforming growth factor beta stimulus. [GOC:mah]	4	0.0155	8.41e-05	0.02
GO_REGULATION_OF_CELL_POPULATION_PROLIFERATION	1766	Any process that modulates the frequency, rate or extent of cell proliferation. [GOC:jl]	8	0.0045	0.00014	0.0325
GO_PEROXISOME_PROLIFERATOR_ACTIVATED_RECEPTOR_SIGNALING_PATHWAY	21	The series of molecular signals initiated by binding of a ligand to any of the peroxisome proliferator activated receptors (alpha, beta or gamma) in the nuclear membrane, and ending with the initiation or termination of the transcription of target genes. [GOC:BHF, PMID:18221086]	2	0.0952	0.000163	0.0369
GO_ION_CHANNEL_REGULATOR_ACTIVITY	119	Modulates the activity of a channel via direct interaction with it. A channel catalyzes energy-independent facilitated diffusion, mediated by passage of a solute through a transmembrane aqueous pore or channel. [GOC:dos]	3	0.0252	0.00017	0.0375
GO_HEART_DEVELOPMENT	589	The process whose specific outcome is the progression of the heart over time, from its formation to the mature structure. The heart is a hollow, muscular organ, which, by contracting rhythmically, keeps up the circulation of the blood. [GOC:jid, UBERON:0000948]	5	0.0085	0.000174	0.0376
GO_EMBRYONIC_MORPHOGENESIS	602	The process in which anatomical structures are generated and organized during the embryonic phase. The embryonic phase begins with zygote formation. The end of the embryonic phase is organism-specific. For example, it would be at birth for mammals, larval hatching for insects and seed dormancy in plants. [GOC:jid, GOC:mtg_sensu]	5	0.0083	0.000193	0.0407
GO_ADRENAL_GLAND_DEVELOPMENT	24	The process whose specific outcome is the progression of the adrenal gland over time, from its formation to the mature structure. This gland can either be a discrete structure located bilaterally above each kidney, or a cluster of cells in the head kidney that perform the functions of the adrenal gland. In either case, this organ consists of two cells types, aminergic chromaffin cells and steroid…	2	0.0833	0.000214	0.0441
GO_EPITHELIAL_TUBE_MORPHOGENESIS	331	The process in which the anatomical structures of a tube are generated and organized from an epithelium. Epithelial tubes transport gases, liquids and cells from one site to another and form the basic structure of many organs and tissues, with tube shape and organization varying from the single-celled excretory organ in Caenorhabditis elegans to the branching trees of the mammalian kidney and ins…	4	0.0121	0.000219	0.0441
GO_REGULATION_OF_SYSTEM_PROCESS	626	Any process that modulates the frequency, rate or extent of a system process, a multicellular organismal process carried out by any of the organs or tissues in an organ system. [GOC:jl]	5	0.008	0.000231	0.0456
GO_MESODERM_DEVELOPMENT	134	The process whose specific outcome is the progression of the mesoderm over time, from its formation to the mature structure. The mesoderm is the middle germ layer that develops into muscle, bone, cartilage, blood and connective tissue. [GOC:dph, GOC:tb]	3	0.0224	0.000241	0.0456
GO_REGULATION_OF_PROTEIN_MODIFICATION_PROCESS	1915	Any process that modulates the frequency, rate or extent of the covalent alteration of one or more amino acid residues within a protein. [GOC:mah, GOC:tb]	8	0.0042	0.000244	0.0456
GO_SPECIFICATION_OF_SYMMETRY	135	The establishment of an organism's body plan or part of an organism such that a similar arrangement in form and relationship of parts around a common axis, or around each side of a plane is created. [GOC:go_curators]	3	0.0222	0.000246	0.0456
