# Supplementary material for: Nongenetic Evolution Drives Lung Adenocarcinoma Spatial Heterogeneity and Progression
Source: Oxford University Press journal article supplement (doi:10.1158/2159-8290.cd-20-1274), 2021-02-09
Supplement: 21598290cd201274-sup-250305_2_supp_6853945_qn4tzl.xlsx [file 21598290cd201274-sup-250305_2_supp_6853945_qn4tzl.xlsx]

## Sheet: Table legend
Supplementary Table 9. Digital Spatial Profiling values and ROIs/AOIs annotations for batch 1 and 2; panels of immune and tumor markers analyzed with Digital Spatial Profiler, with functional categories as reported by the manufacturer; associations between protein expression and location in CD45+ and PanCK+ AOIs.

## Sheet: DSP batch1 - SNR
Patient	Sample	ROI	Pattern	TLS_status	location	immune_ratio	4-1BB CD137	ARG1	B7-H3	Bcl-2	Beta-2-microglobulin	CD11c	CD127	CD14	CD163	CD20	CD25	CD27	CD3	CD34	CD4	CD40	CD44	CD45	CD45RO	CD56	CD66b	CD68	CD8	CD80	CTLA4	EpCAM	ER alpha	FAPalpha	Fibronectin	FOXP3	GAPDH	GITR	GZMB	Her2/ErbB2	Histone H3	HLA-DR	ICOS	IDO1	Ki-67	LAG3	MART1	Ms IgG1	Ms IgG2a
1	s1D	ROI01	lepidic	non_TLS	core	0.0907407	0.5	1.3	33.9	1.5	15.4	5	7.9	2.5	1.7	0.9	2.3	0.2	6.1	209	7.8	3	150.9	11.8	4.4	5.9	0.9	12.1	2.4	0.2	1.8	7.5	1.2	0.7	183	0.8	48.7	0.3	3.9	2.4	601.8	26.7	0.6	1.2	5.1	0.3	0.5	1.1	0.3
1	s1D	ROI02	lepidic	non_TLS	core	0.0929825	0.6	0.6	27.4	1.5	17.8	12.3	5.7	2.3	1.3	0.8	2.5	0.2	6.9	128.6	8.3	2.7	147	12.5	5	5.7	0.5	11.5	4.8	0.3	4.3	9.3	1.5	0.7	123.1	0.4	40.1	0.4	5.7	3	514.8	54.5	0.4	0.9	5.4	0.6	0.7	1	0.3
1	s1D	ROI03	lepidic	non_TLS	core	0.23331	0.5	1.8	56.6	2.8	37.1	49.4	7.7	6.5	11.4	1.4	3.5	0.4	11.2	135.5	25.2	7.9	540.3	46.9	12.4	5.5	5.3	73.8	4	0.8	4.3	7.2	1.3	0.6	88.8	0.8	84.2	0.3	5.1	2.1	776.9	97.7	1.6	2	9.9	0.5	0.6	1.8	0.5
1	s1D	ROI04	lepidic	non_TLS	core	0.227139	0.2	0.5	17.5	2.1	39.4	9.9	4.9	3	2.9	0.6	1.6	0.4	17.2	102.9	23.2	5.6	346.9	36.3	18.1	3.5	0.7	11.9	5.8	0.6	5.3	3.2	0.8	0.6	125.9	0.7	36.9	0.3	3.3	1.1	707.9	34.9	1.4	5.8	5.7	0.2	0.5	0.7	0.3
1	s1D	ROI05	lepidic	non_TLS	core	0.592904	0.5	0.4	21.3	5.2	67.3	30.4	6.2	2.6	2.8	5.9	2.5	0.9	54.9	102.6	45.3	8.5	346.6	92.4	42.7	4.3	0.8	18.4	9.4	0.6	1.6	2.5	1.3	0.5	61.7	0.6	71.8	0.5	4.8	1.1	1042.8	44.7	2.5	9.4	10.5	0.2	0.6	1.1	0.5
1	s1D	ROI06	acinar	non_TLS	core	0.566242	0.6	0.4	35.4	4	74.9	34.8	4.3	4.9	2.9	2.2	1.7	0.5	61.6	153.6	54.7	10	409.8	86.4	49.4	5.7	0.7	16.7	14.1	0.8	2.4	5.4	1.4	1.7	104	0.6	80.1	0.6	4	1.5	891.1	57.3	2.9	7	8.8	0.5	0.7	1.7	0.3
1	s1D	ROI07	acinar	TLS	core	0.802662	0.8	0.5	28.5	11.8	112.3	42.6	4.4	6.8	4.5	66.9	2.9	1.5	75.8	140.7	55.1	16.3	409.3	241.8	54.2	3.6	1.9	25.3	15.2	0.5	1.4	6.3	1.7	1.1	56.9	0.4	138.6	0.4	7.6	0.8	621.2	57.5	3.6	6	6	0.8	0.8	0.9	0.3
1	s1D	ROI08	acinar	TLS	core	0.853825	0.7	0.6	21.7	16.3	130.2	33.8	6.1	5.3	5.2	95.1	3.3	1.8	67.7	154.3	47.6	19.7	346.3	250.1	44.8	3.9	1.9	18.9	11.4	0.9	1.7	3.8	1.4	1.1	87.2	0.6	151.6	0.4	5	0.9	885.8	45.4	3.1	4.3	10.5	0.4	0.6	1	1.1
1	s1D	ROI09	acinar	non_TLS	core	0.618807	0.7	0.5	40.2	5	92.8	48.2	6.7	9	6.4	7.6	3.4	1.7	79.1	220.7	53.4	14.2	475.7	184.4	46.9	8.1	1.5	33.7	16.9	0.7	2.6	10.9	2.7	1.6	77.1	0.6	138.1	0.7	3.9	1.6	580.8	103.8	3.6	5.2	6.9	0.5	0.8	1.4	0.6
1	s1D	ROI10	acinar	non_TLS	core	0.439472	1	1	43.1	4.7	92.3	29.9	6.5	8.9	10.2	1.4	3.1	0.7	60.1	201.5	36.5	10.6	300.2	103.7	37.1	4.2	1.8	40.8	17.4	0.3	10	14.2	2	2.2	196.4	0.6	77.2	0.7	5.1	2	365.5	72.8	3.5	6.3	5.9	1.2	1.4	1.4	0.5
1	s1D	ROI11	acinar	TLS	core	0.882781	1	0.8	27.1	15.2	153.6	84.7	6.1	5.1	6	101.7	5.1	2.7	138.8	79.1	86.6	30.9	486.3	309	73.7	5.5	1.8	23.5	27.3	1.4	4.7	3.8	2.3	2.4	147.1	0.4	150.3	0.8	7.5	1.8	839.7	89.8	5.3	12	8.6	1.1	0.9	1.4	2
1	s1D	ROI12	acinar	non_TLS	core	0.47466	0.3	0.4	22.6	3.4	60.7	30.2	3.6	7.9	8.1	1.6	1.9	0.6	30.7	122	26.1	7.2	207.1	58	21.2	4.2	1.5	26.5	5.3	0.7	1.4	4.3	1.9	0.9	114.4	0.4	74.8	0.3	3.5	0.7	329.5	63	1.4	2.8	6.5	0.4	0.4	0.7	0.7
2	s2C	ROI01	papillary	non_TLS	core	0.189958	0.6	0.9	35.7	3.2	39.1	5.8	11.7	2.4	6.8	2.3	4.4	0.9	17.9	127.8	13	8.3	767.9	48.6	11.7	4.7	0.5	16.9	6.5	1.1	2.7	35.9	3.4	0.5	86.7	0.4	100.4	0.4	3.9	1.5	854.6	143.5	1.5	6.1	3	0.6	0.4	1.2	0.2
2	s2C	ROI02	papillary	non_TLS	core	0.252327	0.5	0.7	33.5	3.6	33.4	6.4	10.5	1.9	8.5	1.7	3.3	0.6	8.8	92.5	9.5	5.8	467.8	36.3	8.4	4.6	0.3	13.5	4.4	0.6	4.9	20	3	0.2	84.5	0.4	112.4	0.2	4.1	1.6	842.5	92.8	1	1.4	3.8	0.4	0.6	1.4	0.3
2	s2C	ROI03	papillary	TLS	core	0.852459	0.2	0.5	12.5	3.4	33.5	5.4	2.3	1.3	4.4	15.8	1.3	0.7	37.5	48.6	22.9	4.8	219.4	88.3	26	1.3	0.3	12	5.7	0.4	0.7	3.9	1.1	0.3	32.3	0.1	20.9	0.2	1.1	0.4	406.5	30	1.5	1.1	2.9	0.2	0.1	0.5	0.1
2	s2C	ROI04	acinar	non_TLS	core	0.501601	0.5	0.8	68.3	3.1	61.9	19.7	4.4	3.6	18.2	7.1	3.9	1.3	46.6	123.1	35	14.4	727.8	96.8	42.7	7.2	0.7	48.5	9.3	1.6	12.9	83.9	2.4	1	130.9	0.5	28.4	0.4	3.3	1.4	709.9	136.3	2.8	1	4	0.7	0.7	1.5	0.7
2	s2C	ROI05	acinar	non_TLS	core	0.526762	0.5	0.7	49.9	3	53.9	9.7	5.1	3.5	28.1	2.8	3.2	1	32	93.9	21.6	6.8	515.4	53.4	22	4.9	1.7	32.4	12.6	1	3.2	32.4	1.8	1	128	0.2	33.5	0.3	2.5	1.1	566.2	115.3	2.6	1	3.1	0.4	0.8	1.3	0.4
2	s2C	ROI06	acinar	TLS	core	0.742353	0.8	0.9	35.8	11.8	118.8	14.3	7.1	4.5	9.2	103.8	3.9	3.2	68.7	87.9	42.3	16	617.8	245.2	58.2	5.3	1	26.9	10.9	1.5	7.7	11.7	2.2	0.8	114	0.2	75	0.5	4.4	0.9	1231.6	75.2	3.3	1.6	4	0.4	0.7	1.6	1.1
2	s2C	ROI07	acinar	non_TLS	core	0.357016	0.4	0.9	47.7	3.1	71.1	18.2	16.7	5.3	10.7	3.1	4.2	1.2	18.3	93.9	17.2	9.6	499.1	66.7	12.6	8.2	0.8	90.3	7.4	1.3	5	17.8	3.1	0.7	63.3	0.4	125.4	0.4	3.6	1.1	871.8	249.8	2	2.1	5.7	0.6	1.3	1.9	0.5
2	s2C	ROI08	papillary	TLS	core	0.743737	0.2	1	39.3	4.4	47.5	11.3	8.6	3	15.8	2.3	2.9	1.1	47.6	60.2	38.8	7.3	451	85.5	34.5	4.6	0.9	38.9	8.5	1	1.4	10.4	1.4	0.2	107.3	0.2	36.7	0.6	2.8	0.6	515.5	68.9	2.7	1.7	6.5	0.3	0.6	0.9	0.2
2	s2C	ROI09	normal	non_TLS	core	0.204114	0.2	0.9	8.3	0.7	12.4	1.6	1.9	1.8	2.1	0.4	1	0.2	1.8	82.1	2.1	0.8	73.6	5.4	1.4	1.7	0.7	10	1.4	0.3	4.8	0.9	0.4	0.5	153.6	0.2	7.3	0	1.9	0.5	93.6	11.6	0.2	2.8	0.7	0.2	0.2	0.8	0.1
2	s2C	ROI10	papillary	non_TLS	core	0.334842	0.4	0.9	60	3	59	19.2	12.9	6.3	18	1.8	4.5	1.1	25.5	120.4	22.4	10.1	1126	77.1	18.8	10.9	0.9	104	7.2	1.5	3.1	16.7	2.4	0.4	85.3	0.4	88.9	0.6	4.1	1.4	1039.1	120.8	3.9	1	5.9	0.4	0.7	1.4	0.7
2	s2C	ROI11	papillary	non_TLS	core	0.159036	0.6	1	62.6	2.6	45.7	20	11.1	4.5	7.8	1.5	3.6	0.6	13.1	118.1	16.3	8.2	635.3	49.1	11.6	11.2	1.1	47.3	3.7	0.7	3.2	11.3	3.7	0.2	79.5	0.3	103.9	0.5	3.5	1.6	848.6	49.9	2	1.1	10.4	0.5	1	1.3	0.7
2	s2C	ROI12	acinar	TLS	core	0.609877	0.5	0.6	40.4	7.3	96.8	30.5	11.7	10.9	13.7	8.7	3.3	2	71.7	78.5	48.4	11.9	463.8	151.1	42.2	6.9	0.6	93.4	17	0.8	2.9	2.7	1.8	0.6	30.8	0.3	119	0.5	4.1	0.6	1084.8	151.9	3.4	10.4	9.2	0.4	0.5	1.3	0.8
5	s5C	ROI01	acinar	non_TLS	periphery	0.449606	0.2	0.9	15.1	3	22.8	21.9	3.7	2.9	5.3	4.6	1.2	0.4	15.6	50.7	18.3	4.3	189.6	37.2	7.1	2.9	0.5	20.9	6.8	0.4	27.7	2.7	0.8	0.3	89.8	0.5	40.4	0.3	4	0.5	455	51.1	1.3	2.2	5.9	0.2	0.1	1.3	0.3
5	s5C	ROI02	acinar	TLS	periphery	0.817296	0.8	0.5	19	10.1	48.7	36.9	5.1	3.1	4.5	28.3	2.2	1	34.4	58.1	36.6	10.9	183.5	109.2	12.1	3	0.2	19.6	8.5	0.4	2.1	2.1	1	0.4	52	0.7	82.1	0.3	5.1	0.6	1403.4	74.2	2.4	3.3	46.9	0.3	0.3	1.2	0.4
5	s5C	ROI03	acinar	non_TLS	core	0.0475651	0.5	0.7	19.8	1.2	12.7	9.6	8.1	1.6	2	0.6	1.9	0.2	5.8	113.3	6.2	4.4	168.8	11.4	1.5	2.4	0.3	13.6	4.4	0.3	2	5.4	0.6	0.5	112	0.4	62.8	0.4	2.9	5.8	544.7	52.7	0.5	0.4	2.8	0.2	0.9	1	0.3
5	s5C	ROI04	acinar	non_TLS	periphery	0.335537	0.6	1.2	52.8	2.5	51.4	24.6	9.6	5.5	8.7	1.1	2.2	0.4	21.9	38.3	27.6	9.5	362.9	50.9	6.8	3.6	0.2	59.9	13.3	0.9	5.5	9.5	1	0.5	38	0.7	59.1	0.3	3.5	2.7	654.8	146	1.9	2.5	7.2	0.6	0.9	1.4	0.4
5	s5C	ROI05	acinar	TLS	core	0.789336	0.9	0.9	24	21.6	61.8	30	6.1	3.3	4.9	48.2	2.8	1.5	39.5	108.5	45.7	16.5	186.5	143.9	13.6	3.5	0.8	16.8	9.2	0.5	3.1	1.9	1.5	0.3	111.4	0.7	78.2	0.6	5.7	1.7	1569.9	72.4	2	3.4	15.3	0.4	0.4	1.3	0.6
5	s5C	ROI06	acinar	TLS	core	0.616418	0.6	1	22	10.5	32.4	15.4	5.4	3.7	5.8	16.9	2.1	0.5	18.3	71.3	22.6	7.8	108.9	63.4	6.6	2.9	0.3	21.2	8.9	0.2	5.2	1.3	1.4	0.6	120.7	0.6	51.6	0.2	3.3	2	969	51.5	1	1.8	9.9	0.1	0.5	1.2	0.4
5	s5C	ROI07	acinar	non_TLS	core	0.323617	0.3	0.6	26.4	2	14.2	30.9	4.4	2.1	3.3	1.5	1.2	0.3	10.4	73.4	16.5	3.5	76.1	28	4.1	1	0.3	22.8	4.6	0.2	1.4	5	0.7	0.3	67.9	0.2	27.9	0.2	2.6	2.8	327.4	44.7	1	1.9	6.2	0.1	0.8	0.8	0.3
5	s5C	ROI08	acinar	non_TLS	core	0.571152	0.6	1.3	35.7	3.6	34.3	140.7	5	8.9	8.2	2	1.8	0.6	15.9	13.8	29.1	4.2	66.5	41.7	9.3	3.6	0.2	137.6	7	0.3	12.3	0.6	1	1.1	132.4	0.5	55	0.2	3.5	1.3	259	80.2	1.1	0.7	3.8	0.3	0.9	1.6	0.4
5	s5C	ROI09	acinar	non_TLS	periphery	0.183002	0.5	0.8	43.4	1.8	23.1	47.9	8	2.2	5.2	1.3	2.3	0.3	11.5	86.3	15.4	6.6	619.8	31.2	4.5	3.4	0.3	48.1	7.7	0.8	3.6	10.8	0.9	0.4	67.6	0.5	43.8	0.4	3.8	4.3	519.4	91.5	1.2	0.7	4.6	0.4	0.9	0.9	0.3
5	s5C	ROI10	acinar	TLS	periphery	0.802187	0.6	1.4	31.3	18.3	73.7	52.5	5.7	3.4	5.4	69.5	2.5	1.3	32.9	113.4	32.7	19.7	227.3	198	15.7	4.1	0.5	33	10.2	0.5	6.5	4.3	1.9	0.5	60.6	0.5	111.4	0.5	6.1	1.2	1395.4	71.6	1.7	2.8	11.6	0.3	0.5	1.4	0.6
5	s5C	ROI11	normal	non_TLS	core	0.186736	0.4	0.9	8.9	1.3	8.9	3.3	1.9	1.6	2.1	0.4	0.6	0.2	1.5	41.7	3.2	2	60.6	4.7	0.9	0.6	0.4	5.6	1.1	0.1	1.8	1.3	0.5	0.5	164	0.2	5.9	0.2	2.5	0.3	95.7	11	0.5	0.1	1	0.2	0.3	0.5	0.3
5	s5C	ROI12	normal	non_TLS	core	0.329829	0.4	0.8	12.2	1.5	18.7	4.2	3.1	2.3	2.6	0.4	1	0.2	2.3	101.8	4.8	2.5	96.5	8.3	1.7	1.1	0.3	14.7	1.6	0.4	1.5	3.1	0.7	0.7	141.2	0.2	11.9	0.1	3.4	0.5	179.3	16.8	0.6	0.2	1.6	0.2	0.4	1.1	0.2
8	s8B	ROI01	lepidic	non_TLS	periphery	0.33893	0.5	1.3	41.8	2.3	30.9	10.3	21.6	3.1	8.3	1.4	3.7	0.2	18.8	70.6	25.4	6.7	229.7	35	11.5	6.9	2.7	22.9	5	0.3	3.1	12.8	2	0.4	44.5	1.3	75.7	0.2	4.8	7.4	1550.1	81.3	0.9	2.8	15.5	0.6	1	1.4	0.3
8	s8B	ROI02	lepidic	non_TLS	core	0.635023	0.5	2.6	63.8	12.4	67.8	14.4	12.1	14.6	15.9	6.2	4.5	1	86.6	109.4	78.1	10.7	354.6	142	40.9	10.4	6.5	27.9	21.5	1.1	6.3	6.7	2.3	1	151.2	1.6	132.4	0.4	7	2.5	1433.9	46.5	3.2	3.3	9.3	0.4	1.1	2.1	1.1
8	s8B	ROI03	papillary	non_TLS	core	0.373543	1.2	0.8	57.3	2.5	43.5	29.1	19.9	2.8	7.3	1.4	3.9	0.3	29.6	91.1	28.9	8.5	225.4	93.1	11.3	6.4	1.5	66.2	10.3	0.9	7.6	8.6	1.7	1	42.3	0.5	254	0.6	6	2.8	1309	106.2	2.8	5.6	8.3	0.5	0.8	1.6	0.7
8	s8B	ROI04	papillary	non_TLS	core	0.493099	0.5	0.6	41.6	2.8	43.2	9.3	9.7	4.2	5.1	2.1	3.2	0.3	48.1	43.6	33.9	6.8	152.3	109	18.3	4.4	0.5	22.7	9.6	0.9	5.9	9.2	1.3	0.9	35.9	0.4	152.7	0.3	3.7	1.3	921.7	70.5	2.9	5.2	6.4	0.4	1.1	1.1	0.3
8	s8B	ROI05	acinar	non_TLS	periphery	0.291722	1	1.3	86.8	4	52.4	13.5	8.5	25.5	19.2	1.2	2.9	0.4	28.6	22.3	32.4	11.3	109.7	74.2	14.6	3	0.2	28.3	13.7	1.2	6.5	4.5	2.1	2.1	222.1	0.6	120	0.6	4.4	1.5	485.1	68.2	2.3	2.1	5.7	0.7	1	1.6	0.4
8	s8B	ROI06	solid	non_TLS	periphery	0.570736	1.4	2.2	46.4	5.7	70.4	77.5	11.8	10.1	15.7	2.2	4.5	0.8	70.3	95.5	86.8	20.3	302.2	124	31	3.4	4.5	47.3	16	1.7	19.9	5.8	1.9	1	374	0.9	107.5	0.5	18.4	1.3	1097.5	60.7	3.3	8.7	32.6	0.5	0.4	1.7	0.7
8	s8B	ROI07	solid	non_TLS	periphery	0.526928	1.5	1.5	53.9	9.4	96.5	87.3	11.9	10.4	15.3	6.3	5.1	1.1	101.5	92.1	89	21.1	268.7	179.7	46.6	6.6	1.2	41.8	22.9	0.8	5.3	5	2	2	204.7	0.9	167.4	0.7	9.5	2.1	1376.8	98.2	6.4	17.9	29.2	0.6	1.5	2	0.6
8	s8B	ROI08	solid	non_TLS	core	0.0102407	0.7	1.1	34.3	1.3	33.6	153.9	17.1	1.9	2.6	1.1	4.5	0.3	7.4	23.7	15.6	18.3	218.2	57.9	11.9	3.4	0.3	26.1	6.6	1	3.4	31.6	1.3	0.4	200.6	0.9	167.9	0.3	7.2	2.5	1860.5	39	0.7	1.8	44.9	0.3	0.6	1.5	0.5
8	s8B	ROI09	solid	non_TLS	core	0.00619638	1.3	1.1	32.8	1.1	26.5	99.3	17.4	1.2	1.7	1.2	4.1	0.3	5.6	23.2	10.6	14.5	168.1	39.3	7	3.1	0.6	20.3	4.6	1	3	30.1	1.8	0.6	185.8	1.6	151	0	9.2	2	2043.5	22.7	0.6	1.1	47.6	0.3	0.9	2	1.2
8	s8B	ROI10	solid	non_TLS	periphery	0.659113	1.7	3	65.8	6.9	73.1	47.5	10.8	29.1	58.7	2.5	5.4	0.7	64.8	223.4	72.5	14.6	266.6	138.5	32.9	5.7	2.7	71	20.1	0.8	5.6	2.6	3.1	2.6	450.9	1	138.8	0.8	9.4	0.9	977.5	38.8	3.9	9.1	32.5	1.4	0.9	2.3	0.5
8	s8B	ROI11	acinar	TLS	core	0.924124	1.3	2.9	41.1	37.9	213.8	127.8	11.2	28.1	44.7	67.6	8.2	2.7	265.6	182.5	180.3	37.2	420.8	614.7	125.2	8.7	4.8	77.3	51.3	1.9	11	1.4	3.7	1.4	244.6	1.3	372.6	0.8	11.7	1.9	3031.1	136.4	10.5	26.7	15.4	0.7	1.3	3.9	1.5
8	s8B	ROI12	solid	non_TLS	periphery	0.539661	1.3	1.8	38.4	6.4	74	92.3	9.9	19.8	30	3.5	5.6	1	84.1	211.6	72.3	17.1	244.7	145.7	39.8	3.9	2.7	38.2	20	1	7.8	6.1	1.8	1.7	544.1	1.1	155.2	0.4	12.7	1.1	1255.1	43.5	4.6	12.2	35.1	0.8	0.9	2.3	1
10	s10B	ROI01	normal	non_TLS	core	0.200342	0.3	3.8	15.5	5.5	53.7	9.9	7.8	5.9	2	2.1	2.6	0.1	7.1	252.5	9.7	6.2	209.6	20.2	5.1	3.6	7.9	15.5	5.8	0.8	4.6	7	1.4	1.8	632.5	0.2	28.5	0.3	9.5	1.1	542.6	31.6	0.8	7.6	6.5	0.1	0.9	0.7	0.5
10	s10B	ROI02	normal	non_TLS	core	0.188623	1	7.1	30.9	8.2	83.3	18.2	10.2	16.8	6.8	2	3.8	1.1	17.2	355.8	18.5	8.5	345.4	42.9	14	8.3	9.7	31.4	7.6	0.9	5.4	6.5	2.1	3.3	1026.5	0.7	48	0.9	13.7	1.2	969.9	54.3	2.2	10.9	13.7	1	1.9	1.6	1.2
10	s10B	ROI03	lepidic	non_TLS	periphery	0.0791667	1.6	3.4	118.4	13.8	142.7	41	46.2	10.8	19.7	5	15.6	2.2	63.2	198	72.2	18.1	1994.5	113.3	45.9	29.1	3.7	81	29.6	4.3	11.6	55.9	6	3.8	861.6	4.7	195.6	1.9	14.2	11.9	5431.5	1196.9	7.4	7	20	1.1	2.7	5.5	2.9
10	s10B	ROI04	lepidic	TLS	core	0.766484	2.4	2.7	62.3	30.8	219	90.8	26.1	8.4	11.3	14.7	10	5.7	238.6	98.8	160.2	32.2	1392.8	332.8	103.9	19.3	2.6	49	70.3	1.6	8.6	11.4	5.2	3.4	298.6	4.4	177.2	1.2	15.2	5.6	5881.8	395.6	10.2	41.7	66.9	1.3	1.3	3	2.2
10	s10B	ROI05	acinar	TLS	periphery	0.5804	1.2	4.9	94.9	28.3	187.1	76	22.6	17	22.7	10.2	12.4	2.1	159.5	323.8	135	25.5	956.7	258.5	86.4	18.1	6.5	83.6	47.6	1.7	27.6	16.4	11.5	3.8	888.4	4	189.5	1.7	15.5	6.8	4533	442.8	8.8	23.7	43.1	1.5	2.7	5.2	2.6
10	s10B	ROI06	acinar	non_TLS	core	0.15703	1.6	2.8	156.3	19.4	166	66.4	53.4	9	26.7	4.9	16.9	1.5	70.5	233.8	85.5	28.8	2316.3	135.2	57.5	44.2	5.8	137.8	26.6	4.9	27.8	69.7	22.6	4.1	739.4	6.6	309	2.4	20.3	18	7081.7	1164	9.6	7.3	35	2	5.9	8.6	5.3
10	s10B	ROI07	normal	non_TLS	core	0.519802	1.5	2.9	18.4	6.5	76.2	22.7	10.2	5.6	3.5	2.2	2.9	0.6	37.7	182.9	43.5	11.9	335.1	74.1	34.1	4.2	7.2	37	9.3	0.6	7.8	3.8	2.9	1.7	493.4	1.8	38.9	0.4	12.1	1.4	1129.3	63.2	1.9	52.9	20.5	1	1	2	0.3
10	s10B	ROI08	lepidic	TLS	core	0.595369	1.6	3.7	78.1	29.4	173.2	98	27.9	8.5	21	26.8	15.2	1.5	111.3	164.2	90.9	26.7	1182.4	223.5	74	13.5	6.2	71.3	48	1.4	6.3	17.7	5.1	2.2	330.8	3.2	216.5	2.6	19.1	10.8	6242.9	572.1	6.5	26.4	71.8	2	2.4	5.2	1.7
10	s10B	ROI09	normal	non_TLS	core	0.628571	0.7	2.8	19.7	9.2	95.7	85.4	10.7	6.3	3.3	1.4	3.8	0.2	50.6	141.1	48.6	18.5	283	101.7	34.8	5.3	7.4	26.4	12.8	1.4	20.2	4.7	0.6	2.5	460.9	1.2	46.7	0.6	8.4	0.8	1102.5	69	3.7	67.4	34.4	0.8	0.8	2.1	0.5
10	s10B	ROI10	lepidic	non_TLS	periphery	0.125773	2.5	3.8	184.1	11.8	140.6	74	48	9	25.1	4.5	17	1.6	61.8	202.9	63.8	26.5	2533.9	112.2	43	37.9	5.2	130.3	26.1	4.6	24.2	112.3	10.3	3.1	985.5	6.2	242.1	2.5	22.2	25.1	7418.3	749.3	8.7	2.2	31.6	1.4	3.2	5.2	2.8
10	s10B	ROI11	acinar	non_TLS	periphery	0.169412	3.1	5.5	188.3	21.4	216.6	83.3	64.1	8.9	26.6	7	18.2	3	89.4	243.8	109	31.1	2406	157	66.6	53.2	8.1	121.8	31.4	3.2	30.6	41.2	22.6	2.7	761.7	9.3	299.1	4.3	37.8	23.6	8376	1340.5	11.6	9.3	42.4	2.2	5.4	8.8	5.1
10	s10B	ROI12	lepidic	TLS	core	0.565483	1.9	4.6	111.9	39.7	208.2	88	36.6	17.8	25.4	38.3	11	2.6	98.6	235.6	95.5	31.9	1177.3	242.7	81	33.2	5.7	121.2	32	4	50.7	39.9	7	2.1	953.8	3.9	274.9	1.9	18.3	12.5	5270.4	430.8	5.9	2.4	19.4	1.7	2	6	4.3
[truncated: 15 more columns]

## Sheet: DSP batch2 - SNR
Patient	Sample	ROI	AOI	Pattern	location	GAPDH	Histone H3	S6	Ms IgG1	Ms IgG2a	Rb IgG	4-1BB	ARG1	B7-H3	BAD	BCL6	BCLXL	Beta-2-microglobulin	BIM	BRAF	CD11c	CD127	CD14	CD163	CD20	CD25	CD27	CD3	CD34	CD4	CD40	CD44	CD45	CD45RO	CD56	CD66b	CD68	CD8	CD80	CD95/Fas	Cleaved Caspase 9	CTLA4	EGFR	FAP-alpha	Fibronectin	FOXP3	GITR	GZMA	GZMB
11	s11C	ROI01	PanCK	acinar		146	314.64	120.62	1.22	0.32	1.46	0.59	1.15	4.61	28.89	0.7	45.19	5.31	2.24	0.06	4.35	14.37	2.04	1.18	0.35	0.97	0.64	2.81	2.12	5.39	0.9	19.15	11.29	2.34	3.11	1.17	8.27	4.96	0.08	0.53	20.89	1.26	0.07	2.09	1.15	80.82	0.36	0.4	6.6
11	s11C	ROI01	CD45	acinar		85.79	483.44	63.78	0.67	0.17	2.16	0.81	0.59	10.85	12.8	0.5	5.59	6.97	0.88	0.03	13.09	3.9	3.42	2.17	0.89	1.12	1.53	12.39	4.47	17.62	1.3	50.21	37.29	3.06	3.61	0.33	29.78	16.11	0.14	0.67	17.03	1.62	0.03	1.18	2.53	7.65	0.37	0.88	8.19
11	s11C	ROI02	PanCK	solid	center	107.14	562.77	113.28	0.88	0.36	1.77	0.39	0.74	5.56	34.89	0.62	19.32	8.51	1.51	0.02	14.54	9.06	3.86	0.32	0.67	1.2	0.31	2.28	2.55	7.08	2.68	19.76	16.54	3.55	3.53	1.4	10.05	3.12	0.18	0.39	13.65	0.65	0.03	1.41	1.24	55.15	0.44	0.56	6.3
11	s11C	ROI02	CD45	solid	center	94.53	486.23	79.87	0.4	0.76	1.84	0.6	1.94	18.02	17.81	0.28	9.49	7.92	0.78	0.08	32.62	7.18	6.63	2.62	0.64	1.85	1.52	7.08	5.18	17.35	3.96	70.96	42.06	2.87	3.74	0.81	66.61	7.91	0.21	0.26	13.19	1.58	0.09	1.47	1.94	15.19	0.39	0.84	9.61
11	s11C	ROI03	PanCK	solid	center	109.71	530.07	135.78	0.93	0.35	1.72	0.5	1.84	7.33	33.93	0.9	16.4	11.81	1.44	0.02	29.75	9	2.63	0.46	0.72	1.55	0.47	2.3	2.36	9.9	3.36	28.96	25.43	3.28	3.44	1.91	16.37	3.78	0.3	0.63	15.17	0.76	0.05	1.67	1.29	72.73	0.28	0.27	7.45
11	s11C	ROI03	CD45	solid	center	97.31	511.82	77.83	1.04	0.41	1.55	1	4.98	12.9	13.51	0.34	5.4	8.94	0.43	0.05	49.15	5.93	4.67	1.52	0.32	1.32	1.34	6.63	3.35	13.29	3.41	60.88	41.15	3.38	3.85	1.18	56.81	6.05	0.15	0.48	15.6	1.96	0.06	1.42	1.55	11.78	0.32	0.36	7.11
11	s11C	ROI04	PanCK	solid	center	127.65	566.43	136.05	0.71	0.48	1.81	0.51	1.12	7.97	39.07	0.99	20.47	10.67	1.19	0.02	19.12	9.36	3.18	0.61	1.06	1.33	0.5	2.7	2.97	9.56	3.71	25.56	20.24	3.31	3.66	1.93	14.26	3.77	0.13	0.6	15.78	1.05	0.05	1.21	1.06	64.93	0.39	0.64	6.66
11	s11C	ROI04	CD45	solid	center	107.16	417.28	87.76	0.69	0.36	1.95	0.59	1.27	16.32	18.43	0.37	5.91	12.93	0.87	0.03	76.71	4.82	11.08	3.11	2.02	1.41	2.15	8.94	6.91	24.2	5.63	106.82	59	3.93	3.79	0.66	67.06	12.28	0.46	0.6	16.39	5.77	0.04	1.23	1.53	13.5	0.44	1.17	9.09
11	s11C	ROI05	PanCK	solid	center	150.86	569.38	141.89	0.95	0.3	1.75	1.18	1.66	9.7	39.7	0.84	33.53	12.65	1.99	0.05	26.2	14.9	11.69	0.88	1.04	2.12	0.91	3.91	3.68	14.37	3.82	31.38	38.63	4.1	4.08	1.61	25.45	4.55	0.13	0.73	21.44	1.18	0.05	2.22	2.12	58.95	0.33	0.69	7.56
11	s11C	ROI05	CD45	solid	center	177.34	563.03	121.57	0.63	0.4	1.97	0.67	2.65	13.74	17.91	0.41	7.59	11.92	1.06	0.12	38.64	5.29	8.87	3.82	1.59	2.24	2.26	9.52	3.81	19.46	6.14	91.88	66.94	4.41	4.85	1.75	82.47	13.92	0.62	0.59	22.47	1.2	0.1	2.37	1.86	5.67	0.21	1.64	10.66
11	s11C	ROI06	PanCK	solid	periphery	83.06	510.47	106.47	0.95	0.35	1.7	0.33	0.78	5.88	28.1	0.77	17.84	10.81	1.26	0.04	19.1	9.93	2.19	0.77	0.69	1.17	0.9	2.49	2.68	7.79	2.98	31.05	16.73	3.21	2.97	0.9	13.83	3.39	0.13	0.42	14.45	0.92	0.04	1.19	1.25	56.98	0.21	0.38	7.1
11	s11C	ROI06	CD45	solid	periphery	68.93	341	72.28	0.66	0.55	1.79	0.45	1.1	11.63	13.92	0.43	6.52	8	0.95	0.1	21.03	3.37	3.67	1.82	0.68	1.12	2.14	5.64	5.6	11.52	1.43	76.71	30.49	2.23	4.11	0.35	37.54	6.56	0.28	0.27	12.2	3.11	0.16	1.24	1.69	6.21	0.24	0.64	7.6
11	s11C	ROI07	PanCK	solid	periphery	84.9	583.81	114.41	0.91	0.62	1.47	0.62	1.2	9.28	23.04	0.7	17.32	9.36	1.36	0.08	24.62	8.59	3.34	1.35	1.47	1.72	0.81	2.05	1.26	11.4	1.83	29.64	21.36	2.59	3.76	1.5	15.13	3.58	0.15	0.65	12.98	0.52	0.08	1.06	1.49	32.96	0.53	0.46	8.02
11	s11C	ROI07	CD45	solid	periphery	89.89	601.17	79.07	1.06	0.24	1.7	1.03	1.87	11.83	10.3	0.23	5	9.97	0.98	0.06	60.24	4.53	5.25	1.67	1.41	1.19	0.97	8.27	4.11	20.26	3.75	76.53	44.21	4.12	3.45	0.37	42.07	13.68	0.05	0.43	16	1.86	0.13	0.91	1.94	5.54	0.22	1.07	11.9
11	s11C	ROI08	PanCK	solid	periphery	152.96	785.98	154.33	0.69	0.58	1.72	1.14	2.24	9.04	31.15	1.07	34.65	11.76	1.38	0.07	14.4	9.37	8.71	1.34	1.42	1.33	0.78	2.56	2.7	10.99	1.59	23.76	26.1	3.22	3.18	1.46	17.12	5.57	0.26	0.75	21.98	1.94	0.07	1.74	1.95	19.63	0.17	1	7.9
11	s11C	ROI08	CD45	solid	periphery	93.19	531.5	89.67	0.43	0.26	2.31	0.24	1.02	8.34	9.61	0.5	4.32	6.15	0.57	0.05	10.77	2.59	5.46	0.91	1.85	0.67	1.07	5.6	5.21	9.88	0.99	33.79	27.95	2.17	3.03	0.59	17.98	7.06	0.14	0.73	13.87	1.6	0.05	1.06	1.58	2.98	0.04	1.02	7.46
11	s11C	ROI09	PanCK	acinar		103.5	357.61	57.45	1.33	0.44	1.23	0.9	0.78	4.91	14.46	0.45	15.51	7.83	0.63	0.04	5.49	11.01	1.5	0.83	0.75	1.01	0.66	2.66	1.46	4.94	1.1	25.95	8.23	1.84	1.76	1	13.45	4.39	0.08	0.37	12.42	1.19	0.15	0.54	1.32	8.32	0.1	0.18	6.39
11	s11C	ROI09	CD45	acinar		77.12	469.32	65.39	0.76	0.47	1.77	0.77	0.71	13.06	9.66	0.29	4.53	6.94	0.47	0.07	12.85	4	6.03	3.54	1.9	1.16	1.82	8.96	4.87	13.74	1.67	101.09	32.36	2.08	2.8	0.23	33.52	20.77	0.13	0.24	12.14	1.47	0.07	1.14	2.13	2.46	0.39	1.25	10.04
11	s11C	ROI10	PanCK	acinar		91.79	828.11	27.62	0.53	0.6	1.87	0.36	0.99	0.47	5.96	0.81	6.23	4.84	0.26	0.2	4.94	2.84	1.33	0.2	1.14	0.46	0.19	2.48	1.33	3.26	0.2	4.67	8.61	2.8	4.24	0.65	5.29	1.31	0.52	0.5	12.39	1.45	0.2	1.22	4.7	3.02	0.31	0.2	7.68
11	s11C	ROI10	CD45	acinar		92.56	1166.35	20.33	0.47	0.42	2.11	0.32	0.35	2.72	4.73	0.18	1.99	4.46	0.23	0.17	4.94	1.98	0.78	0.4	0.67	0.54	0.5	3.84	0.94	4.07	0.54	12.79	14.61	1.24	6.12	0.58	7.11	2.32	0.15	0.15	11.16	0.85	0.17	0.65	5.47	0.61	0.41	0.24	8.11
11	s11C	ROI11	PanCK	solid	periphery	91.29	716.14	120.51	0.63	0.35	2.02	0.53	3.06	7.71	22.68	0.6	22.06	12.17	0.78	0.12	24.43	14.93	1.57	0.93	1.57	1.18	0.45	6	3.79	11.7	1.68	32.43	23.94	2.96	3.84	3.6	15.22	6.35	0.31	0.5	17.84	1.14	0.14	1.02	2.49	37.96	0.18	0.63	10.14
11	s11C	ROI11	CD45	solid	periphery	76.69	718.35	69.59	0.37	0.42	2.2	0.68	1.87	9.13	9.09	0.67	5.62	8.71	0.8	0.05	36.78	4.4	3.64	3.43	4.2	1.45	0.66	12.79	3.89	18.13	1.33	89.2	44.65	3.25	3.94	0.87	35.43	14.2	0.16	0.67	14.01	1.99	0.05	0.75	3.64	3.72	0.18	0.76	16.1
11	s11C	ROI12	PanCK	solid	periphery	101.85	652.67	117.48	0.82	0.28	1.9	0.26	0.57	4.32	21.09	0.97	23.14	6.44	1.18	0.09	6.22	8.54	1.52	0.53	0.72	0.73	0.31	1.62	2.28	4.69	0.86	13.2	8.1	1.71	3.08	1.55	7.82	1.97	0.04	0.48	17.18	0.72	0.05	0.81	1.29	32.21	0.07	0.19	11
11	s11C	ROI12	CD45	solid	periphery	100.11	609.64	97.01	0.22	0.4	2.37	0.76	0.84	10.49	10.54	0.26	6.43	8.34	0.44	0.08	23.47	4.97	2.71	1.23	2.4	1.3	1.19	4.36	4.95	12.62	2.73	52.87	29.93	2.28	4.43	1.01	36	8.4	0.37	0.35	22.61	2.19	0.08	1.76	1.62	5.98	0.19	0.9	37.57
12	s12B	ROI01	PanCK	solid	periphery	258.14	899.24	185.93	0.9	0.57	1.53	0.12	0.31	2.7	27.33	1.29	7.27	4.77	2.22	0.02	4.77	10.38	2.99	0.15	1.45	1.1	0.64	3.23	1.94	3.87	0.69	10.54	16.37	3.26	3.63	0.89	7.15	3.39	0.14	0.27	22.15	0.92	0.03	1.27	2.87	9.79	0.03	0.33	3.92
12	s12B	ROI01	CD45	solid	periphery	192.22	807.75	90.44	0.67	0.45	1.88	0.23	0.18	2.4	9.25	0.44	3.21	5.32	0.88	0.01	5.13	3.24	2.02	0.64	6.12	0.63	1.03	5.2	2.48	6.39	1.1	25.75	29	2.78	3.72	0.1	6.47	4.34	0.07	0.28	14.75	0.72	0.03	0.91	2.24	2.74	0.21	0.19	3.39
12	s12B	ROI02	PanCK	solid		219.1	1027.62	182.99	0.73	0.29	1.98	0.24	0.57	7.06	50.6	1.11	14.33	6.94	3.08	0.02	4.5	12.24	2.69	0.25	0.88	1.85	0.56	1.85	2.17	3.81	0.67	11.16	13.63	2.92	4.08	0.79	8.58	3.01	0.15	0.25	19.91	1.37	0.02	0.77	2.54	15.22	0.11	0.55	4.84
12	s12B	ROI02	CD45	solid		172.21	586.04	102.52	0.54	0.7	1.76	0.36	0.43	6.68	21.63	0.31	7.36	5.36	1.54	0.02	6.88	4.41	4.51	0.74	0.85	0.81	1.52	3.69	4.68	5.64	1.23	48.49	30.05	2.77	3.26	0.36	14.44	4.29	0.15	0.55	14.89	2.11	0.03	1.05	2.39	3.23	0.16	0.45	3.96
12	s12B	ROI03	PanCK	solid	center	172.9	674.43	107.24	0.69	0.37	1.94	0.08	0.35	4.05	28.49	0.72	9.47	5.32	2.21	0.01	4.14	7.3	2.83	0.24	0.53	1.17	0.79	1.76	1.83	3.58	0.48	12.94	12.92	2.07	3.03	0.49	7.39	2.75	0.07	0.2	14.65	1.31	0.01	1	1.92	8.71	0.11	0.21	3.86
12	s12B	ROI03	CD45	solid	center	210.57	607.64	103.8	0.71	0.24	2.05	0.36	0.48	6.43	19.92	0.66	8.41	6.88	1.52	0.06	6.3	4.87	5.42	0.56	0.35	1.34	1.87	4.11	3.64	6.15	1.78	48.78	31.06	2.55	3.19	0.26	16.72	5.29	0.13	0.38	17.79	3.91	0.03	0.94	3.26	3.8	0.03	0.6	3.62
12	s12B	ROI04	PanCK	solid	center	179.25	689.39	114.24	0.66	0.5	1.84	0.17	0.49	4.53	32.13	0.8	10.48	6.75	2.06	0.03	5.54	7.28	4.03	0.43	0.72	0.99	0.59	2.64	1.66	3.87	1.07	18.09	20.25	2.8	2.8	0.44	10.44	3.28	0.13	0.41	14	1.29	0.01	0.94	1.7	10.15	0.1	0.32	3.46
12	s12B	ROI04	CD45	solid	center	255.78	659.12	102.62	0.92	0.37	1.72	0.7	0.41	7.84	21.76	0.21	8.73	9.63	1.56	0.05	13.03	4.94	8.75	1.17	2.01	1.37	1.82	7.35	3.2	9.94	2.71	61.75	55.17	3.93	4.61	0.18	25.63	9.6	0.49	0.7	19.04	3.97	0.03	1.3	2.6	4.28	0.13	0.7	4.19
12	s12B	ROI05	PanCK	solid	center	168.76	714.85	135.3	0.78	0.49	1.73	0.17	0.33	7.2	37.47	0.83	13.65	8.59	3.06	0.01	6.28	9.55	4.4	0.41	0.9	1.4	0.55	2.53	2.65	4.32	1.07	16.74	21.87	2.71	3.37	0.62	13.11	3.89	0.13	0.48	14.91	1.03	0.01	1.02	1.71	16.17	0.14	0.47	3.53
12	s12B	ROI05	CD45	solid	center	218.43	564.16	114.22	0.68	0.32	2	0.34	0.47	10.92	25.38	0.23	10.28	11.67	1.5	0.06	14.4	5.44	11.67	0.77	1.56	1.4	1.93	7.14	4.93	10.24	3.38	62.11	55.65	4	4.19	0.37	35.22	8.38	0.36	0.67	20.25	2.18	0.03	1.49	2.68	5.06	0.14	0.8	5.92
12	s12B	ROI06	PanCK	solid		151.13	733.39	131.13	0.86	0.48	1.66	0.16	0.37	6.84	37.9	0.93	12.85	9.87	3.77	0.01	6.67	8.65	3.64	0.2	0.85	1.42	0.57	2.56	2.06	4.02	1.1	11.09	17.1	3.08	3.16	0.52	10.31	3.62	0.07	0.38	13.23	1.02	0.01	0.94	1.42	16.13	0.08	0.47	3.76
12	s12B	ROI06	CD45	solid		219.46	651.36	125.5	0.71	0.44	1.86	0.54	0.43	11.11	28.22	0.49	8.99	14.73	1.66	0.01	18.81	5.46	10.33	1.07	5.43	1.51	2.89	10.55	5.06	13.96	4.34	82.27	70.92	5	3.5	0.31	37.03	15.83	0.37	0.77	17.22	2.24	0.04	1.4	1.67	6.17	0.16	1.68	5.64
12	s12B	ROI07	PanCK	solid	periphery	150.23	498.02	142.22	0.61	0.48	1.9	0.34	0.46	4.68	28.53	0.89	10.05	8.12	3.17	0.03	5.49	8.08	3.26	0.85	1.06	1.26	0.58	2	2.11	4.75	0.53	13.85	14.89	3.16	4	0.43	7.64	4.14	0.13	0.24	14.68	2.83	0.03	0.85	1.15	12.3	0.18	0.53	4.54
12	s12B	ROI07	CD45	solid	periphery	147.42	500.34	120.19	0.64	0.43	1.94	0.49	0.5	7.07	15.19	0.39	6.55	10.09	1.23	0.02	17.12	4.73	6.77	1.46	3.62	1.27	2.3	10.26	5.41	14.8	2.71	82.59	50.54	5.14	4.8	0.4	20.15	18.9	0.24	0.53	14.17	3.65	0.01	1.53	1.9	4.15	0.12	0.93	5.53
12	s12B	ROI08	PanCK	solid	center	190.54	780.17	112.42	0.5	0.57	1.93	0.2	0.68	2.62	23.96	0.93	6.41	4.43	1.76	0.05	4.01	5.21	2.88	0.49	0.64	1.34	0.48	2.46	1.78	3.17	0.24	11.48	14.29	3.49	3.9	0.88	7.12	2.31	0.26	0.29	13.8	1.49	0.05	1.3	2.85	6.46	0.29	0.11	5.17
12	s12B	ROI08	CD45	solid	center	215.82	624.11	88.89	0.76	0.36	1.88	0.25	0.64	3.53	15.31	0.56	7.72	5.5	0.79	0.03	5.62	3.68	4.52	0.53	1.08	1.14	1.08	3.84	2.15	4.95	0.68	33.41	25.82	3.37	4	0.46	11.78	3.29	0.11	0.25	15.4	2.86	0.02	1.17	4.56	2.91	0.17	0.24	4.99
12	s12B	ROI09	PanCK	solid		188.51	880.68	120.91	0.54	0.26	2.2	0.13	0.53	2.36	20.27	1.02	7.23	4.18	1.3	0.02	4.24	5.15	2.5	0.21	0.65	1.22	0.4	2.6	1.55	3.48	0.22	8.62	14.76	2.42	4.86	0.35	5.58	2.68	0.15	0.21	13.55	1.2	0.04	1.03	3.15	5.58	0.11	0.23	6.14
12	s12B	ROI09	CD45	solid		243.47	844.78	110.17	0.66	0.31	2.03	0.07	0.67	4.25	14.78	0.84	6.34	5.98	0.75	0.04	7.31	3.54	5.07	0.33	1.21	1.5	0.98	4.75	3.18	5.56	1.15	33.59	31.92	3.36	5.07	0.52	12.25	5.22	0.13	0.51	17.97	1.48	0.04	1.19	6.7	3.21	0.31	0.53	8.11
12	s12B	ROI10	PanCK	solid	periphery	128.66	849.76	71.81	0.66	0.36	1.98	0.05	0.4	1.1	12.43	1.33	4.39	2.83	0.53	0.02	3.41	2.91	1.4	0.21	0.51	0.91	0.21	1.77	0.85	2.6	0.21	2.96	7.92	1.74	3.83	0.25	3.15	1.72	0.02	0.1	8.52	0.71	0.02	0.9	2.64	2.93	0.06	0.21	5.66
12	s12B	ROI10	CD45	solid	periphery	173.53	883.99	61.14	0.42	0.48	2.09	0.06	0.38	1.41	8.96	0.64	3.83	3.37	0.25	0.03	5.09	2.27	2.24	0.7	1.15	0.83	0.39	2.76	1.06	3.84	0.4	9.71	16.41	2.79	4.3	0.44	5.17	2.24	0.18	0.4	10.59	1.12	0.03	1.18	5.49	2.5	0.07	0.24	6.48
12	s12B	ROI11	PanCK	solid	periphery	220.77	765.47	172.28	0.72	0.54	1.74	0.11	0.43	3	31.1	1.24	10.53	4.34	1.89	0.01	4.11	10.12	2.37	0.54	0.78	1.1	0.38	1.91	1.9	3.62	0.37	5.85	9.87	2.68	4.19	0.58	5.16	2.17	0.06	0.31	19.63	1.12	0.02	1.07	1.78	10.62	0.1	0.24	4.56
12	s12B	ROI11	CD45	solid	periphery	187.04	639.96	108.58	0.5	0.35	2.15	0.2	0.48	4.67	12.73	0.42	5.81	5.15	1.25	0.03	6.35	4.18	3.37	1.13	1.89	0.82	0.75	4.61	5.11	6.01	0.72	24.15	26.58	2.66	4.07	0.72	9.97	3.49	0.13	0.21	14.7	1.74	0.03	1.21	3	3.13	0.26	0.21	4.3
12	s12B	ROI12	PanCK	solid	periphery	146.96	634.39	139.2	0.75	0.37	1.88	0.27	0.48	8.37	31.79	0.86	13.96	8.33	2.49	0.01	13.93	9.61	6.26	0.87	1.21	1.67	1.02	4.19	4.1	7.05	1.71	37.79	31.71	4.15	3.65	0.59	13.89	6.63	0.21	0.41	15.68	1.37	0.01	1.22	1.8	12.03	0.13	0.56	5.41
12	s12B	ROI12	CD45	solid	periphery	162.71	502.9	108.58	0.48	0.56	1.96	0.7	0.72	10.79	20.64	0.4	10.18	10.51	1.48	0.02	16.53	5.12	8.62	0.99	2.35	1.66	3.37	9.86	6.17	12.54	2.77	104.43	57.97	4.81	4.25	0.38	23.89	13.84	0.35	0.53	15.51	2.1	0.05	1.49	1.93	3.86	0.23	0.74	5.48
13	s13B	ROI01	PanCK	solid	periphery	119.18	750.89	122.23	0.59	0.34	2.07	0.16	0.94	0.38	8.36	0.68	3.43	1.8	0.15	0.04	3.55	3.34	1.26	0.29	0.31	1.12	0.27	1.12	0.78	2.11	0.23	1.92	5.54	1.23	2.1	0.54	2.83	1.94	0.03	0.24	9.68	0.29	0.23	1.41	2.72	3.88	0.17	0.27	7.89
13	s13B	ROI01	CD45	solid	periphery	95.07	810.87	90.63	0.52	0.38	2.1	0.18	0.43	0.58	3.88	0.42	1.82	1.72	0.17	0.13	7.02	2.03	1.16	0.6	0.51	0.79	0.23	2.15	0.76	2.62	0.1	5.9	8.73	1.29	2.58	0.2	3.83	2.05	0.08	0.06	9.89	0.53	0.04	0.95	3.07	1.61	0.11	0.49	5.1
13	s13B	ROI03	PanCK	solid	periphery	203.29	831.99	210.28	0.66	0.34	2	0.2	0.57	1.25	15.95	0.73	4.36	2.53	0.33	0.01	4.21	4.57	0.9	0.34	0.48	0.96	0.25	1.72	1.04	2.83	0.23	3.49	6.74	1.45	3.21	0.4	5.19	2.46	0.06	0.17	11.47	0.51	0.11	0.82	1.7	10.85	0.15	0.29	6.88
13	s13B	ROI03	CD45	solid	periphery	163.28	954.3	150.97	0.96	0.2	1.84	0.31	0.48	2.03	6.97	0.33	2.36	3.97	0.54	0.05	13.65	3.73	2.85	0.86	1.11	1.15	0.33	4.9	1.05	6.95	0.49	15.54	25.94	2.7	3.19	0.4	11.42	5.18	0.16	0.26	11.39	1.07	0.37	0.91	2.74	2.48	0.05	0.8	7.1
13	s13B	ROI04	PanCK	solid	periphery	316.06	913.55	226.96	0.69	0.44	1.87	0.19	0.59	1.55	21.99	1	4.57	2.88	0.45	0.03	3.21	5.31	1.17	0.46	0.7	1.43	0.2	1.83	1.33	2.75	0.16	4.24	6.27	2.29	3.52	0.46	4.78	2.14	0.07	0.29	16.02	0.67	0.17	1.18	2.72	15.71	0.14	0.52	8.48
13	s13B	ROI04	CD45	solid	periphery	139.24	851.45	131.47	0.35	0.55	2.1	0.29	1.17	2.77	8.88	0.46	2.07	2.69	0.34	0.08	8.62	4.4	2.55	0.57	1.11	0.59	0.38	3.86	0.92	6.16	0.2	10.25	18.1	1.59	2.41	0.32	9.35	2.9	0.26	0.36	10.95	1.73	0.08	0.59	2.05	3.78	0.3	0.76	7.3
13	s13B	ROI05	PanCK	solid	periphery	182.63	846.06	145.13	0.62	0.39	1.99	0.1	0.46	0.74	16.49	0.75	3.04	2.14	0.37	0.01	4.1	2.73	1.12	0.46	0.57	0.77	0.09	1.9	0.66	2.68	0.19	2.05	5.3	1.4	2.83	0.39	4.09	1.79	0.09	0.14	10.03	0.41	0.06	1.18	2.19	6.36	0.09	0.48	7.29
13	s13B	ROI05	CD45	solid	periphery	123.4	835.94	108.96	0.39	0.53	2.07	0.2	0.27	0.96	6.22	0.53	2.27	2.38	0.28	0.06	9.27	3.44	1.77	0.46	1.59	1	0.16	4.28	0.79	4.9	0.74	7.95	15.25	1.99	2.56	0.22	6.83	3.2	0.05	0.17	8.5	0.38	0.12	0.92	2.91	2.62	0.16	0.48	5.69
13	s13B	ROI06	PanCK	solid	center	218.82	854.28	136.35	0.6	0.53	1.87	0.3	0.53	1.46	15.76	0.58	3.54	2.81	0.53	0.03	3.75	4.74	1.24	0.36	0.4	1.76	0.26	1.83	1.09	2.86	0.27	3.93	6.34	1.74	3.25	0.33	4.81	2.26	0.09	0.23	11.73	0.33	0.06	1.14	3.18	9.19	0.18	0.49	8.44
13	s13B	ROI06	CD45	solid	center	153.99	1007.01	105.58	0.31	0.48	2.21	0.25	0.33	1.8	6.38	0.38	2.45	3.42	0.3	0.04	10.15	2.92	2.49	0.56	2.51	0.7	0.37	4.57	0.86	4.29	0.84	18.42	27.74	2.84	2.88	0.16	7.37	2.83	0.13	0.21	7.99	0.53	0.04	1.12	4.13	1.92	0.18	0.71	7.17
13	s13B	ROI07	PanCK	solid	center	336.39	792.17	137.87	0.56	0.43	2.01	0.18	1.16	3.25	14.79	0.61	4.07	2.72	0.48	0.01	3.36	4.34	1.81	0.59	0.53	2.18	0.2	1.57	1.43	2.66	0.36	9.76	5.39	1.56	3.15	0.49	4.9	1.79	0.05	0.18	14.5	0.72	0.16	1.27	4.42	14.95	0.18	0.3	7.24
13	s13B	ROI07	CD45	solid	center	201.48	558.94	106.91	1.43	0.75	0.82	0.8	0.83	6.64	9.21	0.68	3.49	1.87	0.8	1.45	7.23	2.6	2.55	0.8	0.8	2.46	0.8	2.24	3.09	5.75	1.5	14.57	14.27	0.8	1.61	0.73	6.81	6.68	0.8	0.8	10.21	3.38	1.46	1.58	5.67	6.43	0.8	1.79	9.05
13	s13B	ROI08	PanCK	solid	center	273.67	648.65	154.74	0.82	0.32	1.85	0.22	0.92	7.39	22.05	0.64	6.52	4.83	0.59	0.07	4.42	6.42	3.41	1.32	0.47	3.18	0.31	2.26	2.05	3.53	0.73	13.02	8.15	2.17	3.66	0.71	6.5	2.9	0.06	0.2	16.37	0.98	0.01	1.43	3.21	23.39	0.08	0.33	5.45
13	s13B	ROI08	CD45	solid	center	169.46	428.08	106.38	0.98	0.43	1.59	0.33	0.76	11.97	11.27	0.31	3.58	3.84	0.61	0.08	6.6	2.37	6.99	2.53	0.32	2.06	0.46	3.32	0.79	6.01	1.29	29.58	19.74	2.28	2.29	0.59	10.7	4.1	0.08	0.16	11.15	1.83	0.17	1.89	3.33	8.72	0.21	0.82	3.76
13	s13B	ROI09	PanCK	solid	center	274.28	603.36	135.05	0.73	0.37	1.89	0.23	1.1	14.57	31.43	0.8	7.12	6.93	1.06	0.05	5.91	7.36	3.52	1.23	0.52	3.99	0.34	2.11	2.33	4.49	1.09	25.89	8	2.47	3.46	0.28	8.29	4.24	0.09	0.32	19.59	1.4	0.03	1.59	2.87	36.77	0.24	0.39	5.27
13	s13B	ROI09	CD45	solid	center	153.51	416.89	93.18	0.75	0.49	1.76	0.6	0.98	26.63	17.55	0.45	3.6	6.86	0.5	0.03	21.03	3.9	7.99	3.57	0.46	2.47	0.67	6.04	1.69	11.55	1.84	55.92	21.78	3.67	3.48	0.26	18.7	8.98	0.1	0.21	14.18	4.72	0.03	2.17	3.22	11.49	0.24	1.13	3.79
13	s13B	ROI10	PanCK	acinar		220.91	844.8	75.26	0.72	0.29	1.99	0.17	1.13	2.87	6.62	0.9	2.2	3.06	0.44	0.08	4.79	2.43	1.52	0.81	0.27	1.05	0.22	1.98	0.93	2.35	0.32	4.81	4.51	1.65	3.35	0.4	5.15	1.69	0.29	0.33	11.98	0.62	0.09	2.4	5.77	7.99	0.14	0.31	5.36
13	s13B	ROI10	CD45	acinar		161.12	1041.35	89.27	0.27	0.56	2.17	0.68	2.18	4.25	4.25	0.51	2.23	2.29	1.26	0.27	8.66	1.79	3.52	0.27	0.26	0.93	0.75	2.25	1.45	3.07	0.57	12.13	8.39	2.41	5.14	1.11	7.26	2.36	0.14	0.53	8.79	1.11	0.41	1.34	17.07	2.88	0.17	0.5	9.86
13	s13B	ROI11	PanCK	acinar		157.74	908.58	75.91	0.57	0.42	2.01	0.12	0.49	0.5	5.23	1.04	1.06	1.76	0.31	0.02	3.35	1.43	0.87	0.88	0.37	0.7	0.08	1.8	0.54	2.41	0.07	0.96	4.1	1.48	3.75	0.12	3.53	1.44	0.05	0.21	8.87	0.39	0.02	1.59	2.97	2.71	0.12	0.41	6.33
13	s13B	ROI11	CD45	acinar		122.91	814.19	69.32	0.37	0.34	2.28	0.12	0.35	0.89	3.5	0.44	1.41	1.83	0.26	0.05	6.12	1.44	1.17	1.08	0.32	0.83	0.21	2.64	0.78	3.35	0.27	5.29	7.34	1.44	2.84	0.19	4.45	1.39	0.07	0.21	10.18	0.97	0.07	1.29	5.29	2.1	0.03	0.26	6.02
13	s13B	ROI12	PanCK	acinar		224.62	816.11	88.03	0.54	0.32	2.14	0.09	0.58	1.31	6.55	0.62	2.29	1.72	0.2	0.06	3.65	2.34	1.35	0.31	0.49	0.83	0.14	1.57	0.88	2.22	0.17	2.9	4.12	1.25	3.53	0.22	3.82	1.75	0.09	0.27	9.81	0.55	0.02	1.41	5.13	6.17	0.05	0.18	4.7
13	s13B	ROI12	CD45	acinar		100.62	489.19	45.51	0.22	1.01	1.77	0.19	0.22	1.61	2.26	0.18	1.69	1.76	0.18	0.22	3.72	2.1	1.84	0.22	0.75	0.22	0.22	1.81	0.62	2.33	0.2	6.62	4.57	1.73	2.82	0.2	2.65	1.8	0.22	0.38	5.11	0.23	0.22	0.85	5.24	1.95	0.25	0.48	3.84
[truncated: 35 more columns]

## Sheet: Panel batch1
Marker	Category
CD127	Immune Activation Status Module
CD25	Immune Activation Status Module
CD27	Immune Activation Status Module
CD40	Immune Activation Status Module
CD44	Immune Activation Status Module
CD80	Immune Activation Status Module
ICOS	Immune Activation Status Module
PD-L2	Immune Activation Status Module
Beta-2-microglobulin	Immune Cell Profiling Core
CD11c	Immune Cell Profiling Core
CD20	Immune Cell Profiling Core
CD3	Immune Cell Profiling Core
CD4	Immune Cell Profiling Core
CD45	Immune Cell Profiling Core
CD56	Immune Cell Profiling Core
CD68	Immune Cell Profiling Core
CD8	Immune Cell Profiling Core
CTLA4	Immune Cell Profiling Core
Fibronectin	Immune Cell Profiling Core
GAPDH	Housekeeper
GZMB†	Immune Cell Profiling Core
Histone H3	Housekeeper
HLA-DR	Immune Cell Profiling Core
Ki-67	Immune Cell Profiling Core
Ms IgG1	Negative control
Ms IgG2a	Negative control
Pan-cytokeratin	Immune Cell Profiling Core
PD-1	Immune Cell Profiling Core
PD-L1	Immune Cell Profiling Core
Rb IgG	Negative control
S6	Housekeeper
SMA	Immune Cell Profiling Core
CD14	Immune Cell Typing Module
CD163	Immune Cell Typing Module
CD34	Immune Cell Typing Module
CD45RO	Immune Cell Typing Module
CD66b	Immune Cell Typing Module
FAPalpha	Immune Cell Typing Module
FOXP3	Immune Cell Typing Module
4-1BB CD137	IO Drug Target Module
ARG1	IO Drug Target Module
B7-H3	IO Drug Target Module
GITR	IO Drug Target Module
IDO1	IO Drug Target Module
LAG3	IO Drug Target Module
OX40L	IO Drug Target Module
STING	IO Drug Target Module
Tim-3	IO Drug Target Module
VISTA	IO Drug Target Module
Bcl-2	Pan-Tumor Module
EpCAM	Pan-Tumor Module
ER alpha	Pan-Tumor Module
Her2/ErbB2	Pan-Tumor Module
MART1	Pan-Tumor Module
NY-ESO-1	Pan-Tumor Module
PR	Pan-Tumor Module
PTEN	Pan-Tumor Module
S100B	Pan-Tumor Module

## Sheet: Panel batch2
Marker	Category	ProbeGroup	tumor_marker	immune_marker
4-1BB	IO Drug Target Module	All targets;T cells;T cell Activation		yes
ARG1	IO Drug Target Module	All targets;Myeloid Supression;Myeloid Activation;M2 Macrophage;Myeloid;Macrophage		yes
B7-H3	IO Drug Target Module	All targets;Checkpoint	yes	yes
BAD	Cell Death Panel	All targets;Apoptosis;Pro-apoptosis	yes	yes
BCL6	Cell Death Panel	All targets;Apoptosis;Anti-apoptosis	yes	yes
BCLXL	Cell Death Panel	All targets;Apoptosis;Anti-apoptosis	yes	yes
Beta-2-microglobulin	Immune Cell Profiling Core	All targets;Tumor;Antigen Presentation	yes	yes
BIM	Cell Death Panel	All targets;Apoptosis;Pro-apoptosis	yes	yes
BRAF	MAPK Signaling Panel	All targets;MAPK;Oncogene	yes
CD11c	Immune Cell Profiling Core	All targets;Myeloid;DC		yes
CD127	Immune Activation Status Module	All targets;Naive and Memory;T cells		yes
CD14	Immune Cell Typing Module	All targets;Monocyte;Myeloid		yes
CD163	Immune Cell Typing Module	All targets;M2 Macrophage;Myeloid;Macrophage		yes
CD20	Immune Cell Profiling Core	All targets;B cells		yes
CD25	Immune Activation Status Module	All targets;Tregs;T cells;T cell Activation		yes
CD27	Immune Activation Status Module	All targets;T cells;T cell Activation		yes
CD3	Immune Cell Profiling Core	All targets;T cells		yes
CD34	Immune Cell Typing Module	All targets;Hematopoietic		yes
CD4	Immune Cell Profiling Core	All targets;T cells;Myeloid;Th cells		yes
CD40	Immune Activation Status Module	All targets;Myeloid Activation;Myeloid		yes
CD44	Immune Activation Status Module	All targets;T cell Activation		yes
CD45	Immune Cell Profiling Core	All targets;Total Immune		yes
CD45RO	Immune Cell Typing Module	All targets;Memory;T cells		yes
CD56	Immune Cell Profiling Core	All targets;NK cells		yes
CD66b	Immune Cell Typing Module	All targets;Neutrophil;Myeloid		yes
CD68	Immune Cell Profiling Core	All targets;M2 Macrophage;Myeloid;Macrophage		yes
CD8	Immune Cell Profiling Core	All targets;T cells;CD8 T cells		yes
CD80	Immune Activation Status Module	All targets;Myeloid Activation;Myeloid		yes
CD95/Fas	Cell Death Panel	All targets;Apoptosis;Pro-apoptosis	yes	yes
Cleaved Caspase 9	Cell Death Panel	All targets;Apoptosis;Caspase	yes	yes
CTLA4	Immune Cell Profiling Core	All targets;T cells;T cell Activation;Th cells;Checkpoint		yes
EGFR	MAPK Signaling Panel	All targets;Receptor Tyrosine Kinase;MAPK;Oncogene;Growth Factor Signaling	yes
FAP-alpha	Immune Cell Typing Module	All targets;Fibroblasts;Stroma
Fibronectin	Immune Cell Profiling Core	All targets;Fibroblasts;Stroma
FOXP3	Immune Cell Typing Module	All targets;Tregs;T cells;Th cells		yes
GAPDH	Housekeeper	All targets;Housekeepers
GITR	IO Drug Target Module	All targets;T cells;T cell Activation		yes
GZMA	Cell Death Panel	All targets;Cytotoxicity		yes
GZMB	Immune Cell Profiling Core	All targets;Cytotoxicity;T cell Activation		yes
Histone H3	Housekeeper	All targets;Housekeepers
HLA-DR	Immune Cell Profiling Core	All targets;MHC2;Antigen Presentation		yes
ICOS	Immune Activation Status Module	All targets;T cell Activation		yes
IDO1	IO Drug Target Module	All targets;Myeloid Supression;Myeloid		yes
INPP4B	PI3K/AKT Signaling Panel	All targets;PI3k-AKT	yes
Ki-67	Immune Cell Profiling Core	All targets;Proliferation	yes	yes
LAG3	IO Drug Target Module	All targets;T cells;T cell Activation;Checkpoint		yes
MET	PI3K/AKT Signaling Panel	All targets;PI3k-AKT;Oncogene	yes
Ms IgG1	Negative control	All targets;Background
Ms IgG2a	Negative control	All targets;Background
NF1	Cell Death Panel	All targets;Tumor Suppressor	yes	yes
OX40L	IO Drug Target Module	All targets;Myeloid Activation;T cell Activation		yes
p44/42 MAPK ERK1/2	MAPK Signaling Panel	All targets	yes
p53	Cell Death Panel	All targets;Tumor Suppressor;DNA Damage	yes	yes
Pan-AKT	PI3K/AKT Signaling Panel	All targets;PI3k-AKT;Oncogene	yes
pan-RAS	MAPK Signaling Panel	All targets;MAPK;Oncogene	yes
PanCk	Immune Cell Profiling Core	All targets;Epithelial;Tumor	yes
PARP	Cell Death Panel	All targets;DNA Damage	yes	yes
PD-1	Immune Cell Profiling Core	All targets;T cells;T cell Activation;Checkpoint		yes
PD-L1	Immune Cell Profiling Core	All targets;Myeloid Activation;Checkpoint	yes	yes
PD-L2	Immune Activation Status Module	All targets;Checkpoint	yes	yes
Phospho-AKT (phospho T308)	PI3K/AKT Signaling Panel	All targets;PI3k-AKT;Oncogene	yes
Phospho-AKT1 (S473)	PI3K/AKT Signaling Panel	All targets;PI3k-AKT;Oncogene	yes
Phospho-c-RAF (S338)	MAPK Signaling Panel	All targets;MAPK;Oncogene	yes
Phospho-GSK3A (S21)/Phospho-GSK3B (S9)	PI3K/AKT Signaling Panel	All targets;PI3k-AKT	yes
Phospho-GSK3B (S9)	PI3K/AKT Signaling Panel	All targets;PI3k-AKT	yes
Phospho-JNK (T183/Y185)	MAPK Signaling Panel	All targets;MAPK	yes
Phospho-MEK1 (S217/S221)	MAPK Signaling Panel	All targets;MAPK;Oncogene	yes
Phospho-p38 MAPK (T180/Y182)	MAPK Signaling Panel	All targets;MAPK	yes
Phospho-p44/42 MAPK ERK1/2 (T202/Y204)	MAPK Signaling Panel	All targets;MAPK;Oncogene	yes
Phospho-p90 RSK (T359/S363)	MAPK Signaling Panel	All targets;MAPK	yes
Phospho-PRAS40 (T246)	PI3K/AKT Signaling Panel	All targets;PI3k-AKT	yes
Phospho-Tuberin (T1462)	PI3K/AKT Signaling Panel	All targets;PI3k-AKT;Tumor Suppressor	yes
PLCG1	PI3K/AKT Signaling Panel	All targets;PI3k-AKT	yes
Rb IgG	Negative control	All targets;Background
S6	Housekeeper	All targets;Housekeepers
SMA	Immune Cell Profiling Core	All targets;Stroma
STING	IO Drug Target Module	All targets;Interferon		yes
Tim-3	IO Drug Target Module	All targets;T cells;T cell Activation;Checkpoint		yes
VISTA	IO Drug Target Module	All targets;Myeloid Activation;Myeloid;Macrophage;Checkpoint		yes

## Sheet: CD45+ center vs periphery
markers	ancova_pval	adj.P.Val
BAD	0.000197385	0.00710586
FOXP3	0.00106424	0.0372486
CD68	0.00114241	0.0388419
HLA.DR	0.00116712	0.0388419
VISTA	0.00177276	0.0567282
Tim.3	0.00191849	0.0594731
CD14	0.00235527	0.070658
CD25	0.0025595	0.0742254
CD40	0.00264444	0.0742254
BCLXL	0.00544668	0.14706
OX40L	0.00643269	0.16725
B7.H3	0.00935101	0.233775
CTLA4	0.0291457	0.699497
ICOS	0.0369437	0.849706
CD20	0.0563954	1
Beta.2.microglobulin	0.0627787	1
CD45	0.0698004	1
CD127	0.0713506	1
CD163	0.0727078	1
NF1	0.0780782	1
Cleaved.Caspase.9	0.0815893	1
Ki.67	0.0998356	1
CD11c	0.174892	1
CD44	0.18553	1
CD27	0.187627	1
GZMB	0.255231	1
IDO1	0.276128	1
CD4	0.286225	1
PARP	0.286379	1
CD45RO	0.295151	1
STING	0.390701	1
p53	0.76112	1
CD56	0.906268	1
CD34	0.921606	1
CD8	0.963426	1
CD3	0.99912	1

## Sheet: PanCK+ center vs periphery
markers	ancova_pval	adj.P.Val
Pan.AKT	0.0023154	0.0370465
Ki.67	0.00539991	0.0809987
BAD	0.006088	0.085232
p53	0.0293752	0.381877
B7.H3	0.0942747	1
BIM	0.150462	1
Beta.2.microglobulin	0.157285	1
Phospho.AKT1..S473.	0.262292	1
INPP4B	0.281921	1
PARP	0.360059	1
MET	0.480049	1
NF1	0.48195	1
PanCk	0.604375	1
Cleaved.Caspase.9	0.772317	1
BCLXL	0.776388	1
Phospho.GSK3B..S9.	0.793951	1
