# Supplementary material for: Nongenetic Evolution Drives Lung Adenocarcinoma Spatial Heterogeneity and Progression
Source: Oxford University Press journal article supplement (doi:10.1158/2159-8290.cd-20-1274), 2021-02-09
Supplement: 21598290cd201274-sup-250305_2_supp_6853947_qn4tzl.xlsx [file 21598290cd201274-sup-250305_2_supp_6853947_qn4tzl.xlsx]

## Sheet: Table legend
Supplementary Table 6. Significantly differentially expressed genes and differentially methylated loci among patterns in CHUV dataset. Log-fold changes between each pair of patterns (abbreviated with their initials, e.g. AvsL = Acinar vs Lepidic) are reported along with p-values and adjusted p-values.

## Sheet: CHUV - Differential expression
genes	LvsS	LvsA	LvsP	PvsS	PvsA	AvsS	AveExpr	F	P.Value	adj.P.Val
IGLV1-40	-2.86609	-2.67526	-2.2438	-0.622288	-0.431455	-0.190833	1.92647	42.8664	1.28892e-09	2.42729e-05
MFAP4	2.21001	-0.203252	0.388114	1.8219	-0.591366	2.41326	6.08549	39.6623	2.73482e-09	2.57511e-05
NEDD9	1.28635	0.447593	0.25259	1.03376	0.195003	0.838754	7.90135	37.5891	4.5731e-09	2.87069e-05
LIMCH1	1.49312	0.341402	0.206563	1.28656	0.134839	1.15172	7.9893	34.874	9.29884e-09	4.37789e-05
FRAS1	2.52012	0.181513	0.551883	1.96824	-0.370371	2.33861	5.51646	33.917	1.20705e-08	4.54623e-05
IGHG2	-2.56447	-2.22918	-1.12417	-1.4403	-1.10501	-0.335287	6.53372	32.6609	1.71552e-08	5.38443e-05
IGHG3	-2.76838	-2.27434	-1.55868	-1.2097	-0.715659	-0.49404	6.26382	31.272	2.56316e-08	6.52536e-05
IFT57	1.44387	0.732668	0.385169	1.0587	0.347498	0.711203	5.65444	30.7117	3.02607e-08	6.52536e-05
IGHG1	-3.3723	-2.6526	-1.87226	-1.50005	-0.780348	-0.719699	8.45356	30.6109	3.11853e-08	6.52536e-05
PRELP	1.39257	-0.530055	-0.106803	1.49937	-0.423252	1.92262	6.17617	29.9469	3.8104e-08	7.17574e-05
IGHA2	-2.84889	-2.43342	-1.99681	-0.85208	-0.436609	-0.415471	4.51624	27.7996	7.46672e-08	0.000125913
FAM30A	-2.07158	-2.25375	-1.83572	-0.235865	-0.418032	0.182166	3.36775	27.5773	8.02333e-08	0.000125913
IGKC	-2.86673	-2.29273	-1.43041	-1.43632	-0.862319	-0.574003	8.58974	26.615	1.10116e-07	0.000151133
MYH11	1.82569	-0.0674224	0.651608	1.17409	-0.71903	1.89312	7.47896	26.5127	1.13944e-07	0.000151133
SLC6A4	3.21353	2.83616	1.94156	1.27198	0.894599	0.377379	1.37173	26.1922	1.26898e-07	0.000151133
IGLC3	-3.25659	-2.34406	-1.82914	-1.42745	-0.514925	-0.912526	6.44407	25.9114	1.39573e-07	0.000151133
ANKRD36BP2	-2.85641	-2.05273	-1.72201	-1.13441	-0.330723	-0.803683	3.73377	25.8346	1.43272e-07	0.000151133
IGHG4	-2.97862	-2.17036	-1.50849	-1.47013	-0.661876	-0.808254	4.43302	25.5657	1.57096e-07	0.000151133
TNFRSF13C	-1.08094	-2.10169	-1.15074	0.0698	-0.950952	1.02075	2.17528	25.5619	1.573e-07	0.000151133
A2M	1.38622	-0.192022	0.171109	1.21511	-0.363132	1.57825	10.1799	25.401	1.66272e-07	0.000151133
KIAA0408	2.76824	0.712108	0.389569	2.37867	0.322539	2.05613	4.70658	25.3467	1.69425e-07	0.000151133
IGHV2-5	-4.80004	-2.65543	-2.15662	-2.64342	-0.498802	-2.14461	1.7966	25.2277	1.76557e-07	0.000151133
ADGRF5	0.735171	0.830749	0.269063	0.466107	0.561686	-0.0955789	8.63925	24.9847	1.92165e-07	0.000157341
IGLL5	-3.35503	-2.39819	-1.80604	-1.54899	-0.592149	-0.956844	3.50195	24.8511	2.01379e-07	0.000158015
IGHA1	-2.55215	-2.53018	-1.77594	-0.776205	-0.754237	-0.0219681	8.24712	24.046	2.68146e-07	0.00018732
PDIA6	-1.15913	0.0992905	0.0690477	-1.22818	0.0302428	-1.25842	6.72951	24.0441	2.6833e-07	0.00018732
MMP12	-5.80175	-2.23937	-0.759946	-5.0418	-1.47943	-3.56237	0.332832	24.0416	2.68567e-07	0.00018732
FAM13A	1.26446	0.155055	-0.0449025	1.30936	0.199957	1.1094	6.74607	23.5994	3.1527e-07	0.000208632
CLIC5	2.42793	1.19916	0.729721	1.69821	0.46944	1.22877	5.6982	23.5477	3.21279e-07	0.000208632
FBLN5	1.64443	0.00273587	0.246567	1.39786	-0.243831	1.64169	5.60741	23.4226	3.36355e-07	0.000211141
ELN	2.08613	-0.0287497	0.391304	1.69483	-0.420054	2.11488	6.60545	23.0172	3.90703e-07	0.000233924
MAMDC2	1.6408	-0.086009	-0.087313	1.72812	0.00130396	1.72681	4.9282	22.918	4.05411e-07	0.000233924
DNAH11	3.0621	0.326153	-0.585982	3.64808	0.912134	2.73595	6.4861	22.8148	4.21346e-07	0.000233924
ZDHHC11	2.28933	0.418401	-0.163717	2.45304	0.582119	1.87092	4.31834	22.8028	4.23246e-07	0.000233924
DMD	1.48987	0.170688	0.499969	0.989899	-0.329281	1.31918	5.96367	22.7312	4.34757e-07	0.000233924
NDNF	1.5965	0.622376	0.0718433	1.52466	0.550533	0.974124	6.93383	22.6486	4.48475e-07	0.000234602
CYP4B1	3.09739	0.293647	-0.923877	4.02127	1.21752	2.80374	6.95875	22.4789	4.78137e-07	0.000243359
MMP9	-3.19878	-2.41168	-1.0225	-2.17629	-1.38918	-0.787104	2.13728	21.8744	6.02387e-07	0.00029853
ZNF385A	-1.06577	-0.54483	-0.22497	-0.840802	-0.31986	-0.520942	3.53257	21.6792	6.49687e-07	0.000311526
IGLC2	-2.7122	-2.28092	-1.53987	-1.17233	-0.741045	-0.431289	6.90693	21.6291	6.62475e-07	0.000311526
DERL3	-1.81182	-1.45292	-1.23114	-0.580677	-0.221774	-0.358903	3.80418	21.5687	6.78237e-07	0.000311526
FHL1	2.11369	0.51261	0.853769	1.25992	-0.341159	1.60108	6.00725	21.5011	6.96374e-07	0.000312241
EMP2	1.20978	0.698347	0.561695	0.648081	0.136653	0.511429	7.98098	21.4369	7.1409e-07	0.000312738
IGLV8-61	-2.28466	-2.92485	-1.99883	-0.285825	-0.926016	0.640191	-0.122362	21.3623	7.353e-07	0.000314708
PLEKHH2	1.46922	0.132914	0.308495	1.16073	-0.175581	1.33631	7.21333	20.89	8.86424e-07	0.000370959
GPC3	2.70234	0.125431	0.0792928	2.62305	0.0461381	2.57691	3.75848	20.6837	9.62787e-07	0.000392707
CILP	-3.49293	-0.119679	0.453755	-3.94669	-0.573435	-3.37325	1.86397	20.6394	9.80098e-07	0.000392707
SVEP1	1.45663	-0.106136	0.735171	0.721457	-0.841307	1.56276	6.14536	20.5832	1.00253e-06	0.000393326
MMP14	-1.23611	-0.274174	0.655233	-1.89134	-0.929408	-0.961934	6.03915	20.0869	1.22681e-06	0.000471495
CD79A	-1.97392	-2.03766	-1.43259	-0.541326	-0.605069	0.0637431	1.55548	19.959	1.29305e-06	0.000487016
FENDRR	2.49902	1.73795	1.40728	1.09173	0.330665	0.76107	3.43941	19.8781	1.33696e-06	0.00049335
MAGI3	1.02913	0.378382	-0.0950262	1.12416	0.473408	0.650751	6.97134	19.8283	1.36477e-06	0.00049335
ANGPT1	2.52923	0.240415	0.647191	1.88204	-0.406776	2.28882	4.80279	19.7868	1.38846e-06	0.00049335
UBXN10	1.83515	0.721535	0.451468	1.38368	0.270067	1.11362	4.59545	19.6576	1.46502e-06	0.000510912
IGLV1-44	-3.82011	-2.04141	-2.04482	-1.77529	0.00341005	-1.7787	1.64805	19.5197	1.5519e-06	0.000516277
JAK3	-0.875426	-0.918392	-0.458546	-0.416879	-0.459845	0.0429659	5.27389	19.4933	1.56913e-06	0.000516277
IGLV3-19	-3.11443	-2.45054	-1.66367	-1.45076	-0.786872	-0.663887	1.59169	19.4779	1.57931e-06	0.000516277
IGHD	-3.09745	-2.62183	-2.86332	-0.234134	0.241486	-0.47562	3.10067	19.448	1.59928e-06	0.000516277
LTBP2	1.53748	-0.283237	0.0228193	1.51466	-0.306056	1.82072	8.93768	19.421	1.61748e-06	0.000516277
EGLN3	-2.80187	-0.702239	0.709264	-3.51114	-1.4115	-2.09963	3.08585	19.3355	1.67676e-06	0.000526279
NEDD4L	0.897764	0.579088	0.315974	0.58179	0.263114	0.318675	7.78855	19.2203	1.76038e-06	0.000543465
FCRL2	-2.27987	-2.15283	-1.54507	-0.734807	-0.607761	-0.127046	1.46072	19.0878	1.86214e-06	0.00056561
ROBO2	2.81041	0.387861	0.415762	2.39465	-0.0279011	2.42255	5.91795	18.9759	1.95309e-06	0.000583819
IGHM	-2.67874	-2.19024	-1.40291	-1.27583	-0.787324	-0.488502	6.58055	18.8648	2.04821e-06	0.000602687
FNDC1	-1.55505	0.515477	1.9918	-3.54685	-1.47632	-2.07053	3.57508	18.7139	2.18549e-06	0.000631708
IGKV1-33	-1.88682	-2.46241	-1.21764	-0.669189	-1.24477	0.575585	2.83837	18.6839	2.21393e-06	0.000631708
HMCN1	1.10478	0.158862	0.295218	0.809563	-0.136356	0.945919	7.79393	18.6019	2.29379e-06	0.000644727
COTL1	-1.63645	-0.318836	0.11276	-1.74921	-0.431596	-1.31761	5.62991	18.5585	2.33736e-06	0.000647312
SCN7A	1.62041	-0.145848	0.0701662	1.55024	-0.216014	1.76626	6.57047	18.5061	2.39108e-06	0.000652592
INMT	2.50731	-0.0332562	0.509629	1.99768	-0.542885	2.54057	5.94217	18.3059	2.60925e-06	0.000701963
CRYM	2.97217	0.207336	0.190943	2.78122	0.0163932	2.76483	3.43405	18.2705	2.65009e-06	0.000702908
ISLR	-1.43324	-0.664005	-0.132739	-1.3005	-0.531266	-0.769233	4.02031	18.047	2.92401e-06	0.000764792
COL1A1	-2.03872	-0.420709	0.302148	-2.34087	-0.722857	-1.61801	8.96513	17.982	3.00935e-06	0.00077633
IGLV2-23	-3.09071	-2.32904	-2.27053	-0.820175	-0.0585096	-0.761666	2.58548	17.8618	3.1744e-06	0.000805171
SLC7A5	-1.51001	-0.475111	0.00514857	-1.51516	-0.480259	-1.0349	4.62769	17.8391	3.20666e-06	0.000805171
ABCA8	2.09896	0.145824	0.290078	1.80888	-0.144254	1.95313	5.32275	17.7768	3.29701e-06	0.000808912
TBX4	2.5689	0.0203287	0.187206	2.3817	-0.166878	2.54857	3.89682	17.7667	3.31203e-06	0.000808912
C1QTNF7	1.8153	-0.113256	0.44683	1.36847	-0.560086	1.92856	3.83102	17.7283	3.36929e-06	0.000808912
IGKV1-5	-2.80854	-1.94022	-0.796325	-2.01221	-1.14389	-0.868321	3.21357	17.7124	3.39338e-06	0.000808912
IL4I1	-2.40936	-1.37358	-0.482605	-1.92676	-0.890978	-1.03578	1.82544	17.6325	3.51714e-06	0.000827934
TPPP3	3.04965	0.880991	0.913641	2.13601	-0.0326505	2.16866	3.4539	17.5233	3.69429e-06	0.000858899
DNAH7	1.97076	0.737761	0.428407	1.54235	0.309355	1.233	4.92936	17.3243	4.04261e-06	0.000922163
VOPP1	-1.40877	-0.486486	-0.143204	-1.26557	-0.343282	-0.922287	5.69184	17.3125	4.06433e-06	0.000922163
VTRNA1-1	-2.6183	-0.428565	-1.15472	-1.46357	0.726159	-2.18973	-0.215338	17.273	4.13815e-06	0.000927734
USP27X	1.92155	0.918043	0.121816	1.79973	0.796227	1.0035	3.09727	17.0693	4.54211e-06	0.00100632
FOLR1	2.8786	0.25068	-0.552995	3.43159	0.803676	2.62792	5.52934	16.9714	4.75125e-06	0.00104041
FAM189A2	1.99078	1.18218	0.688584	1.30219	0.493594	0.808598	3.28674	16.8888	4.93596e-06	0.00106844
PIM1	-1.1915	-0.486363	-0.249815	-0.941684	-0.236548	-0.705136	4.59397	16.8068	5.12689e-06	0.00109715
CCDC88A	-1.3101	-0.185676	-0.00782676	-1.30227	-0.17785	-1.12442	6.56595	16.7142	5.35246e-06	0.00113256
IGKV3-20	-2.85416	-1.98251	-1.46448	-1.38968	-0.518025	-0.871656	3.95976	16.3933	6.22087e-06	0.00130168
ADH1B	2.16994	-0.0207155	0.220224	1.94971	-0.240939	2.19065	7.05733	16.3503	6.34845e-06	0.00130398
ZDHHC11B	2.40843	0.563575	-0.189218	2.59765	0.752793	1.84485	4.72908	16.343	6.37035e-06	0.00130398
IGLC1	-2.72353	-2.32375	-1.9209	-0.802635	-0.402857	-0.399778	5.96705	16.2454	6.67168e-06	0.00135098
FCRL5	-2.56553	-1.90044	-1.58776	-0.977771	-0.312684	-0.665087	3.79156	16.1288	7.052e-06	0.0014128
SHROOM4	1.09222	0.415811	0.306384	0.785838	0.109427	0.676412	6.57761	16.0845	7.20286e-06	0.00142747
CPAMD8	1.37652	0.281304	0.45081	0.925713	-0.169505	1.09522	6.35379	16.0476	7.33099e-06	0.00142747
ZSCAN18	1.33814	0.0750359	0.09349	1.24465	-0.0184541	1.26311	5.32106	16.0201	7.42778e-06	0.00142747
SNHG3	-0.848352	-0.173349	0.0602037	-0.908555	-0.233553	-0.675002	5.7391	16.02	7.42841e-06	0.00142747
HMGA1	-1.51934	-0.238994	-0.381314	-1.13803	0.14232	-1.28035	4.31426	15.9653	7.6257e-06	0.00145058
MIAT	-1.40366	-0.854833	-0.356976	-1.04668	-0.497856	-0.548828	5.32563	15.7335	8.52756e-06	0.00160591
MTHFD2	-1.49378	-0.247843	0.00745502	-1.50124	-0.255298	-1.24594	4.67753	15.6198	9.01153e-06	0.00168025
SDR16C5	1.06939	0.843942	0.275748	0.793639	0.568194	0.225444	4.68838	15.5908	9.13959e-06	0.00168742
IGHV1-24	-4.20147	-2.54571	-1.3147	-2.88677	-1.23101	-1.65576	-1.0616	15.5647	9.25682e-06	0.00169247
EPAS1	0.878008	0.553186	0.587595	0.290414	-0.0344089	0.324823	8.29341	15.4843	9.62779e-06	0.00174337
APOE	-1.77401	-0.706344	-0.143425	-1.63059	-0.562918	-1.06767	4.9913	15.4489	9.79606e-06	0.00175695
DNALI1	2.15349	0.362677	0.330129	1.82336	0.0325481	1.79081	4.43727	15.3945	1.00612e-05	0.00177027
TMC5	1.07342	0.511307	0.415271	0.658153	0.0960362	0.562117	7.52744	15.3737	1.01649e-05	0.00177027
ACACB	1.13301	-0.294652	-0.207645	1.34065	-0.0870067	1.42766	5.54451	15.3457	1.0306e-05	0.00177027
CSRNP1	1.24322	0.463493	0.276868	0.966352	0.186625	0.779727	5.63117	15.3437	1.03159e-05	0.00177027
TXNDC5	-1.06201	-0.782913	-0.656856	-0.405151	-0.126057	-0.279094	7.55361	15.3389	1.03404e-05	0.00177027
ELOVL6	-2.04729	0.134852	0.710386	-2.75767	-0.575534	-2.18214	2.58901	15.2551	1.07771e-05	0.00182842
ADARB1	1.32331	-0.04025	0.486535	0.83678	-0.526785	1.36356	6.01707	15.2191	1.09703e-05	0.00183006
DPT	1.65286	-0.479197	0.315117	1.33774	-0.794314	2.13206	3.41384	15.2172	1.09811e-05	0.00183006
AOC3	1.47708	-0.254026	0.171143	1.30594	-0.425169	1.73111	5.74241	15.1674	1.12552e-05	0.00184849
IGHV4-61	-3.08716	-2.57384	-1.55513	-1.53202	-1.01871	-0.513317	0.87009	15.1614	1.12891e-05	0.00184849
KIAA0930	-0.837555	-0.465169	-0.234348	-0.603207	-0.230822	-0.372385	5.17394	15.1421	1.13974e-05	0.00184849
THBS2	-1.71745	-0.631299	0.217656	-1.9351	-0.848955	-1.08615	6.21245	15.1268	1.14844e-05	0.00184849
PDK1	-1.52257	-0.913076	-0.748045	-0.774526	-0.165031	-0.609495	5.56352	15.1059	1.16044e-05	0.00185198
HTRA3	-2.4787	-0.854519	-0.240802	-2.2379	-0.613718	-1.62418	3.15397	15.0866	1.17164e-05	0.00185414
MYO7A	-1.47652	-0.584801	-0.222584	-1.25394	-0.362217	-0.891722	3.25576	15.0214	1.21034e-05	0.00189942
IGHV2-70	-2.94035	-2.32808	-1.62029	-1.32006	-0.707787	-0.612275	-0.485572	15	1.22339e-05	0.00190404
EPB41L5	0.901682	0.379252	-0.145149	1.04683	0.524402	0.52243	6.65875	14.9609	1.24754e-05	0.00191028
ABI3BP	1.21105	0.149537	0.169769	1.04128	-0.0202323	1.06151	6.00541	14.9606	1.24768e-05	0.00191028
HMGA2	-5.13389	-0.681697	0.102693	-5.23658	-0.78439	-4.45219	-0.204635	14.9	1.28616e-05	0.00195331
ATP13A4	1.70884	0.449504	-0.109483	1.81832	0.558987	1.25933	7.12929	14.8509	1.31828e-05	0.00198607
POU2AF1	-1.56612	-1.85412	-1.2176	-0.348522	-0.636526	0.288004	3.36297	14.7871	1.36136e-05	0.0020347
ORAI2	-0.639977	-0.59498	-0.145429	-0.494549	-0.449551	-0.0449978	4.90431	14.7607	1.37959e-05	0.0020457
DGKA	-0.67439	-0.673863	-0.321301	-0.353089	-0.352561	-0.000527299	5.12387	14.7369	1.39627e-05	0.00205426
PTPRS	0.984438	-0.131283	0.151522	0.832916	-0.282805	1.11572	6.57256	14.7119	1.41404e-05	0.00206428
GDF10	4.02751	-0.0662799	0.582345	3.44517	-0.648625	4.09379	1.84975	14.6472	1.46117e-05	0.00210124
LRP4	2.16701	0.181433	0.604282	1.56273	-0.422849	1.98558	4.12687	14.6465	1.46167e-05	0.00210124
TM4SF1	1.22237	0.781472	0.838245	0.38412	-0.0567738	0.440894	7.07576	14.5887	1.50527e-05	0.00214719
LIMD2	-0.714818	-0.887163	-0.480749	-0.234069	-0.406414	0.172345	3.76754	14.5731	1.51721e-05	0.00214719
ADAMTS18	-3.73936	-2.34801	-1.36174	-2.37762	-0.986268	-1.39135	-0.991738	14.5503	1.535e-05	0.00214719
PARD3B	0.929916	0.220924	0.104246	0.82567	0.116678	0.708992	5.48565	14.5448	1.53925e-05	0.00214719
SLC12A8	-1.22979	0.348359	0.327318	-1.55711	0.0210408	-1.57815	3.24453	14.48	1.59103e-05	0.0022031
IGLV2-14	-2.61059	-2.14437	-1.58974	-1.02085	-0.554632	-0.466216	3.30521	14.434	1.6289e-05	0.00223909
MAGI1	0.97603	0.355587	0.2479	0.728129	0.107687	0.620443	5.94278	14.3741	1.67974e-05	0.00229224
EZR	0.696404	0.422928	0.131456	0.564948	0.291472	0.273476	8.06682	14.3588	1.69293e-05	0.00229361
MACF1	0.69397	0.0639729	0.169485	0.524486	-0.105512	0.629998	10.7383	14.3432	1.70657e-05	0.00229559
FMO2	1.70459	0.032998	0.254756	1.44984	-0.221758	1.67159	6.22141	14.3266	1.72124e-05	0.00229889
RSPH1	3.68116	0.901225	0.481229	3.19993	0.419996	2.77994	1.84612	14.2098	1.82814e-05	0.00242447
FANCD2	-1.13872	-0.124228	-0.155761	-0.982954	0.0315325	-1.01449	3.56476	14.0791	1.95632e-05	0.00257632
TMEM175	0.411061	-0.381659	-0.813525	1.22459	0.431866	0.79272	4.07705	14.0313	2.0056e-05	0.00259236
LAMA2	0.949032	-0.284962	-0.112422	1.06145	-0.17254	1.23399	6.85074	14.0285	2.00852e-05	0.00259236
TPPP	1.57637	0.514906	0.057301	1.51907	0.457605	1.06146	5.31794	14.0188	2.01873e-05	0.00259236
CA4	2.11952	3.33979	2.08761	0.0319088	1.25218	-1.22027	-0.724233	14.0142	2.02356e-05	0.00259236
MYH10	0.994043	0.0824974	0.311535	0.682509	-0.229037	0.911546	7.47662	13.9319	2.11249e-05	0.00268655
CDC6	-2.11267	-0.283305	-0.717235	-1.39543	0.43393	-1.82936	1.44627	13.9201	2.12561e-05	0.00268655
CAB39L	1.87219	0.305241	0.237201	1.63499	0.0680402	1.56695	3.84939	13.9043	2.14331e-05	0.00268784
SLIT3	1.49317	-0.140733	0.436318	1.05685	-0.577051	1.6339	5.88741	13.889	2.16055e-05	0.00268784
IGLV2-8	-2.4099	-2.06955	-1.97796	-0.431932	-0.0915857	-0.340346	2.68133	13.8692	2.18313e-05	0.00268784
JCHAIN	-2.07628	-1.98088	-1.29903	-0.777245	-0.681842	-0.0954027	7.44528	13.8516	2.20337e-05	0.00268784
CYP4A11	3.00395	0.537848	-0.415582	3.41954	0.95343	2.46611	3.51798	13.8404	2.2164e-05	0.00268784
DENND2A	1.3639	0.220056	0.656352	0.70755	-0.436295	1.14385	3.55676	13.8355	2.22211e-05	0.00268784
LINC00926	-0.61356	-1.37816	-0.428924	-0.184636	-0.949237	0.764601	2.68134	13.8317	2.22654e-05	0.00268784
CCDC40	1.55481	0.436354	0.212035	1.34278	0.22432	1.11846	3.47552	13.8059	2.25696e-05	0.00270721
NUSAP1	-1.76723	0.0561923	-0.420525	-1.3467	0.476717	-1.82342	2.43557	13.7846	2.28251e-05	0.00272052
IGKV1-39	-5.67178	-4.12834	-2.97606	-2.69572	-1.15227	-1.54345	-1.27799	13.7462	2.32918e-05	0.00275869
SULF1	-2.15635	-0.430727	-0.193927	-1.96242	-0.2368	-1.72562	5.72456	13.6422	2.46095e-05	0.00289654
ATP2A3	-0.760362	-0.753781	-0.440571	-0.319791	-0.31321	-0.00658127	5.18627	13.6173	2.49377e-05	0.00290359
SMARCA1	0.712221	0.342542	0.108239	0.603982	0.234303	0.369679	5.89537	13.6095	2.50408e-05	0.00290359
RGS4	-1.82027	0.537514	1.47403	-3.29431	-0.936518	-2.35779	0.785802	13.6026	2.5132e-05	0.00290359
NKD1	1.4635	-0.106282	0.451486	1.01201	-0.557768	1.56978	5.76452	13.5821	2.54084e-05	0.00291763
CHRDL1	1.77757	-0.284497	-0.0758771	1.85344	-0.20862	2.06206	4.91629	13.5577	2.57397e-05	0.00292183
TNXB	1.52665	-0.112258	0.407984	1.11866	-0.520242	1.63891	7.11288	13.5391	2.59969e-05	0.00292183
NEK5	2.21006	0.632585	0.257135	1.95292	0.37545	1.57747	2.94571	13.5312	2.61062e-05	0.00292183
ZNF91	0.767377	0.131253	-0.014519	0.781896	0.145772	0.636124	6.88421	13.5295	2.61303e-05	0.00292183
KIF26B	-1.63012	-0.326742	-0.221583	-1.40853	-0.105159	-1.30338	5.71941	13.523	2.62207e-05	0.00292183
DKK3	1.15054	-0.119513	0.0813218	1.06922	-0.200835	1.27005	5.92111	13.4974	2.65816e-05	0.00294461
KRT7	1.24304	0.202065	-0.0598761	1.30291	0.261941	1.04097	6.79825	13.4335	2.75044e-05	0.00302903
FBLN1	1.02835	-0.27314	0.275842	0.752506	-0.548982	1.30149	6.21179	13.4102	2.78507e-05	0.00303046
CD27	-1.42919	-1.76748	-1.44456	0.0153742	-0.322921	0.338295	1.71238	13.407	2.78986e-05	0.00303046
IGKV1-12	-2.2012	-2.9354	-3.11252	0.911323	0.177121	0.734202	1.0592	13.4002	2.80002e-05	0.00303046
IGHV4-39	-2.08969	-1.92826	-0.898292	-1.1914	-1.02997	-0.161431	1.85467	13.3558	2.86756e-05	0.00308583
NR3C2	0.936802	0.229937	0.0359411	0.90086	0.193995	0.706865	5.61468	13.3321	2.90438e-05	0.00309108
COL1A2	-1.38363	-0.224301	0.420212	-1.80384	-0.644513	-1.15932	9.00709	13.3315	2.90528e-05	0.00309108
RPS2	-0.681111	-0.186542	0.160689	-0.841799	-0.347231	-0.494568	7.91404	13.2917	2.96823e-05	0.00314032
CYBRD1	0.97952	0.153477	0.0686231	0.910897	0.0848537	0.826044	7.7096	13.2117	3.0993e-05	0.00326067
ADGRL2	1.03003	0.685641	0.680517	0.349516	0.00512388	0.344392	5.51831	13.1976	3.12299e-05	0.0032639
SPARCL1	1.10497	-0.0992827	0.139919	0.965053	-0.239202	1.20426	6.76453	13.1806	3.15183e-05	0.0032639
MZB1	-1.5104	-1.80305	-1.22796	-0.282433	-0.575088	0.292655	2.76144	13.1791	3.15437e-05	0.0032639
HELLS	-1.22017	-0.169216	-0.0774601	-1.14271	-0.0917561	-1.05095	4.29919	13.1341	3.23232e-05	0.00332629
DLC1	0.77578	0.740547	0.850362	-0.0745823	-0.109815	0.0352328	7.72225	13.0814	3.32623e-05	0.00340178
DAPK2	1.26524	0.454322	-0.0112958	1.27654	0.465618	0.810919	5.77923	13.0707	3.34583e-05	0.00340178
TBX5	1.93804	0.0385012	0.171638	1.76641	-0.133136	1.89954	4.12884	13.063	3.35987e-05	0.00340178
RGL1	1.07416	-0.0552779	-0.0131574	1.08732	-0.0421206	1.12944	5.65783	13.0262	3.42784e-05	0.00345203
CABCOCO1	3.68057	1.01935	0.294396	3.38617	0.724953	2.66122	0.242994	13.0063	3.46539e-05	0.00347129
CEP112	0.949031	-0.0438742	-0.220983	1.17001	0.177109	0.992905	5.00897	12.9198	3.63324e-05	0.00362017
ENGASE	0.940256	-0.274591	-0.350775	1.29103	0.0761836	1.21485	5.5809	12.8682	3.7378e-05	0.00370475
RPLP0	-0.655813	-0.240726	-0.00875853	-0.647054	-0.231967	-0.415087	7.82505	12.805	3.87006e-05	0.00380958
CKAP2L	-2.24162	-0.186683	-0.174124	-2.06749	-0.0125593	-2.05494	0.973738	12.7985	3.88402e-05	0.00380958
RBMS3	0.824845	0.106122	0.301683	0.523162	-0.19556	0.718723	6.34845	12.7462	3.99763e-05	0.00390069
BLK	-1.1539	-2.52038	-1.38193	0.228033	-1.13845	1.36648	1.15486	12.7191	4.05817e-05	0.00393935
GPRC5A	0.57549	0.560578	0.377894	0.197596	0.182684	0.0149117	8.90643	12.6961	4.11018e-05	0.00396938
COL11A1	-4.83584	-1.82436	1.24372	-6.07956	-3.06807	-3.01149	1.08468	12.6692	4.17197e-05	0.00400849
KIF13A	1.03261	0.3727	0.047229	0.985386	0.325471	0.659915	6.8292	12.6302	4.26323e-05	0.00407539
GPX3	1.39009	0.00996998	-0.112206	1.50229	0.122176	1.38012	6.45187	12.5994	4.33687e-05	0.00412484
ADGRD1	1.80795	0.472775	0.162131	1.64582	0.310644	1.33518	6.8316	12.5849	4.37203e-05	0.00413739
POSTN	-2.00819	0.12904	0.0825644	-2.09075	0.0464754	-2.13723	6.25195	12.5477	4.46375e-05	0.00420307
IGLV5-45	-3.2769	-2.62067	-1.92807	-1.34883	-0.692599	-0.656235	-1.4327	12.5292	4.51001e-05	0.0042255
CPNE5	-1.3547	-1.45496	-0.850609	-0.50409	-0.604354	0.100265	2.52982	12.5197	4.53404e-05	0.00422698
NPFFR1	-1.33524	0.610482	2.2968	-3.63204	-1.68632	-1.94573	1.36353	12.504	4.57409e-05	0.00424332
ESM1	-1.44941	1.34851	2.18605	-3.63546	-0.837537	-2.79792	0.780911	12.4754	4.64773e-05	0.00429049
IGKV1D-39	-2.46448	-1.8154	-1.11159	-1.35289	-0.703808	-0.649082	3.50242	12.3987	4.8521e-05	0.00445037
MEI1	-1.63815	-1.66286	-1.5114	-0.126753	-0.151467	0.0247135	1.41822	12.3928	4.86818e-05	0.00445037
ITGAX	-1.14705	-0.528841	-0.154447	-0.992603	-0.374394	-0.618209	5.87168	12.3818	4.89845e-05	0.0044564
PRG4	3.25039	0.21707	-0.377678	3.62807	0.594748	3.03332	3.58214	12.329	5.04644e-05	0.00456897
ACAP1	-0.388267	-0.647117	-0.0420125	-0.346254	-0.605105	0.258851	4.78356	12.2814	5.1839e-05	0.00465708
RPPH1	-0.70637	-0.25727	-0.0324182	-0.673952	-0.224852	-0.4491	11.9644	12.2782	5.19322e-05	0.00465708
RANBP17	0.854154	0.494223	-0.268247	1.1224	0.76247	0.359931	5.35756	12.2032	5.41857e-05	0.00480733
LMOD1	1.63493	-0.263242	0.413029	1.2219	-0.676271	1.89817	4.05329	12.1974	5.43638e-05	0.00480733
FOXF1	0.591815	0.850083	1.12412	-0.532304	-0.274035	-0.258269	3.27002	12.1893	5.46149e-05	0.00480733
GALNT15	0.558152	-1.24978	-0.0377008	0.595852	-1.21208	1.80793	2.22498	12.1888	5.46288e-05	0.00480733
IGLV1-51	-1.11677	-2.23545	-1.56676	0.449991	-0.66869	1.11868	2.59638	12.1108	5.7107e-05	0.00499147
MKI67	-1.7862	-0.113499	-0.27367	-1.51253	0.160171	-1.6727	4.35495	12.1064	5.72513e-05	0.00499147

## Sheet: CHUV - Differential methylation
probes	LvsS	LvsA	LvsP	PvsS	PvsA	AvsS	AveExpr	F	P.Value	adj.P.Val	meanL	meanP	meanA	meanS	Fantom_Promoter_Number	Fantom_Promoter_Gene_Symbol
cg19218929	-2.40346	-0.405618	0.462343	-2.8658	-0.867961	-1.99784	0.557171	39.9882	1.89617e-09	0.00138469	0.537441	0.448275	0.60829	0.850278	NA	NA
cg24917104	-2.26588	-0.213134	-0.294087	-1.97179	0.0809522	-2.05274	-2.77578	32.1685	1.54874e-08	0.00401572	0.107345	0.110278	0.118179	0.362071	p2	SMTNL2
cg10377216	-1.99114	-0.658907	-0.342984	-1.64816	-0.315923	-1.33224	-1.39505	31.954	1.64972e-08	0.00401572	0.209408	0.291066	0.307212	0.490736	NA	NA
cg06691682	-1.81528	-0.587378	-0.0367004	-1.77858	-0.550677	-1.2279	-0.0266973	29.9301	3.04563e-08	0.00556023	0.419206	0.422424	0.518604	0.7729	NA	NA
cg02030141	-2.06507	-0.617119	-0.226495	-1.83857	-0.390624	-1.44795	0.0964154	27.1843	7.38439e-08	0.010785	0.423546	0.478296	0.551788	0.767351	NA	NA
cg13802364	-1.88861	-0.133242	0.343152	-2.23177	-0.476394	-1.75537	-3.25569	24.1942	2.10115e-07	0.0189033	0.0805868	0.0833117	0.0945671	0.240002	NA	NA
cg07861343	-2.60768	0.0597853	0.292818	-2.9005	-0.233032	-2.66747	1.65469	23.8722	2.36495e-07	0.0189033	0.709953	0.685009	0.730625	0.922456	NA	NA
cg01892666	-2.10359	-0.61484	-0.432373	-1.67121	-0.182467	-1.48875	-2.15304	23.7563	2.4685e-07	0.0189033	0.133358	0.243784	0.194006	0.428657	NA	NA
cg01148766	-1.85166	-0.616785	-0.300877	-1.55079	-0.315908	-1.23488	-0.113353	23.6718	2.54718e-07	0.0189033	0.417408	0.427509	0.50416	0.701551	NA	NA
cg02814485	-1.8869	-0.493577	0.155695	-2.04259	-0.649271	-1.39332	0.557145	23.6284	2.58858e-07	0.0189033	0.543746	0.46759	0.618648	0.816849	NA	NA
cg08654262	-1.78846	-0.468318	-0.068422	-1.72004	-0.399896	-1.32014	-0.180488	23.3649	2.85631e-07	0.0189622	0.397667	0.426971	0.492033	0.707426	NA	NA
cg02064349	-1.97444	-0.767418	-0.271548	-1.70289	-0.495871	-1.20702	-0.348274	22.8315	3.49469e-07	0.0212669	0.353729	0.386572	0.48768	0.698392	NA	NA
cg15838148	1.71462	0.293773	-0.0959705	1.81059	0.389743	1.42084	-0.618679	21.8428	5.12667e-07	0.0261723	0.445849	0.41795	0.392982	0.23815	NA	NA
cg02608723	-1.6202	-0.727789	-0.138545	-1.48166	-0.589244	-0.892412	-0.366315	21.8132	5.18673e-07	0.0261723	0.359317	0.390014	0.488329	0.632752	NA	NA
cg18807940	2.05487	0.322715	-0.0530151	2.10788	0.37573	1.73215	1.03861	21.7225	5.37598e-07	0.0261723	0.724217	0.708267	0.662684	0.418149	NA	NA
cg10985150	-1.45311	-0.849402	-0.389457	-1.06366	-0.459945	-0.603711	-0.343011	21.409	6.08949e-07	0.0276543	0.360972	0.383484	0.50523	0.61389	NA	NA
cg02280683	-1.8052	-0.396671	0.227213	-2.03242	-0.623884	-1.40853	-0.203872	21.2701	6.43777e-07	0.0276543	0.406676	0.392414	0.491066	0.688587	p1	FAP
cg06599697	-1.89892	-0.714553	-0.346663	-1.55225	-0.36789	-1.18436	0.407709	21.015	7.13515e-07	0.0277662	0.484773	0.510946	0.59232	0.8195	NA	NA
cg01252219	-1.60848	-0.490138	-0.149813	-1.45866	-0.340324	-1.11834	0.540884	20.6519	8.27271e-07	0.0277662	0.53015	0.537823	0.620234	0.766604	NA	NA
cg26257095	-1.30279	-0.777153	-0.112576	-1.19021	-0.664576	-0.525635	-1.35155	20.6089	8.4199e-07	0.0277662	0.233431	0.220519	0.328731	0.448862	NA	NA
cg09606770	-1.98728	-0.459429	-0.291444	-1.69583	-0.167985	-1.52785	0.671401	20.5064	8.78261e-07	0.0277662	0.551788	0.548772	0.62017	0.814263	NA	NA
cg23440155	-1.50439	-0.417133	-0.358145	-1.14624	-0.0589883	-1.08725	-0.546287	20.3105	9.52332e-07	0.0277662	0.34934	0.374774	0.428795	0.613667	p1	CYP4B1
cg20979153	1.83297	0.181775	-0.0565746	1.88955	0.23835	1.6512	-1.06844	20.2795	9.64677e-07	0.0277662	0.365459	0.358802	0.332334	0.171591	NA	NA
cg12840191	-1.65852	-0.357457	-0.318281	-1.34024	-0.0391758	-1.30107	-0.217473	20.2678	9.6936e-07	0.0277662	0.407762	0.441742	0.463426	0.684678	NA	NA
cg21830683	1.84108	0.737565	-0.0068733	1.84795	0.744438	1.10351	1.10204	20.2579	9.73369e-07	0.0277662	0.750038	0.715858	0.643026	0.451096	NA	NA
cg01906291	-1.64917	-0.599558	0.0301393	-1.67931	-0.629697	-1.04961	-0.517689	20.2206	9.88586e-07	0.0277662	0.348594	0.337339	0.451758	0.626388	NA	NA
cg20371639	-1.8747	-0.644225	-0.013894	-1.8608	-0.630331	-1.23047	0.257874	19.8919	1.13438e-06	0.028337	0.470022	0.447054	0.578516	0.78746	NA	NA
cg12105042	-1.84576	-0.788785	-0.35235	-1.49341	-0.436435	-1.05697	0.763528	19.7345	1.21228e-06	0.028337	0.527684	0.635348	0.656003	0.812766	p2	RAPGEF2
cg08454858	-2.11102	-0.568759	-0.526879	-1.58415	-0.0418805	-1.54227	-0.110225	19.6555	1.25358e-06	0.028337	0.400478	0.455038	0.489516	0.7681	p1	ENST00000439823
cg20391883	-2.58658	1.02879	0.795263	-3.38184	0.233531	-3.61537	-2.59082	19.5569	1.30724e-06	0.028337	0.156437	0.146677	0.107374	0.452584	p5	PROK2
cg08232668	-1.65671	-0.460042	-0.494003	-1.16271	0.0339612	-1.19667	-2.80931	19.5454	1.31364e-06	0.028337	0.103668	0.119955	0.127544	0.27533	NA	NA
cg04520242	-1.84452	-0.613744	-0.18256	-1.66196	-0.431184	-1.23078	-0.675302	19.5454	1.31367e-06	0.028337	0.30653	0.348256	0.427045	0.622987	NA	NA
cg10842229	-1.73086	-0.76996	-0.158799	-1.57206	-0.611161	-0.960904	-1.85838	19.5449	1.31396e-06	0.028337	0.165873	0.191512	0.247611	0.431321	p1	LRRC52
cg12958092	-1.61819	-0.695825	-0.464535	-1.15365	-0.23129	-0.92236	0.632324	19.4015	1.39697e-06	0.028337	0.508055	0.634964	0.638991	0.766558	NA	NA
cg07584230	-1.70292	-0.372541	-0.167786	-1.53513	-0.204755	-1.33037	0.814817	19.3234	1.44457e-06	0.028337	0.558381	0.602826	0.644662	0.84	NA	NA
cg20137410	-1.51794	-0.417724	-0.141043	-1.3769	-0.276682	-1.10022	0.958105	19.291	1.46479e-06	0.028337	0.588157	0.636657	0.666813	0.840329	NA	NA
cg07892915	-1.81943	-0.452368	-0.986735	-0.832692	0.534368	-1.36706	0.16996	19.2274	1.50544e-06	0.028337	0.445154	0.585317	0.535044	0.711609	NA	NA
cg18825531	-1.78934	-1.08392	-0.675826	-1.11351	-0.408096	-0.705418	-2.42615	19.1314	1.56917e-06	0.028337	0.112583	0.145773	0.212811	0.254501	p1	AF083120
cg11092095	-1.65132	-0.820525	-0.152175	-1.49915	-0.668349	-0.830797	0.587173	19.1257	1.57303e-06	0.028337	0.513385	0.526985	0.64685	0.799429	NA	NA
cg06800849	0.92238	1.20128	0.592535	0.329845	0.608746	-0.2789	3.65653	19.0465	1.62798e-06	0.028337	0.948994	0.922144	0.887433	0.905882	NA	NA
cg07955854	-1.18477	-0.765791	-0.248199	-0.936568	-0.517593	-0.418975	-0.427164	18.9758	1.67871e-06	0.028337	0.360022	0.391224	0.474449	0.578135	p1	MIR99AHG
cg21664764	-1.69985	-0.644019	-0.648503	-1.05135	0.00448476	-1.05583	0.389419	18.9441	1.70206e-06	0.028337	0.489944	0.553412	0.584739	0.758669	NA	NA
cg03862381	-1.9321	-0.746984	-0.263763	-1.66834	-0.483221	-1.18512	-1.37613	18.9176	1.72182e-06	0.028337	0.214888	0.262261	0.311943	0.501528	NA	NA
cg20574648	-1.28292	-0.939934	-0.269089	-1.01383	-0.670845	-0.342983	-0.813019	18.8429	1.77891e-06	0.028337	0.286679	0.311855	0.435816	0.509329	NA	NA
cg05331807	0.0574805	1.13401	1.23756	-1.18008	-0.103548	-1.07653	3.06114	18.7587	1.84564e-06	0.028337	0.920949	0.846813	0.856268	0.899114	NA	NA
cg08641951	1.91306	-0.105203	-0.670721	2.58378	0.565518	2.01826	1.77014	18.7314	1.86792e-06	0.028337	0.775193	0.827674	0.773702	0.514561	NA	NA
cg13722096	-1.15876	-0.877147	-0.507233	-0.651523	-0.369914	-0.281608	-0.673119	18.7133	1.88279e-06	0.028337	0.312775	0.35955	0.452764	0.506909	NA	NA
cg03278568	1.66541	0.155889	-0.36407	2.02948	0.51996	1.50952	0.963139	18.671	1.91811e-06	0.028337	0.690282	0.734404	0.642792	0.453894	NA	NA
cg05690805	-1.73676	-0.685695	-0.413364	-1.3234	-0.272331	-1.05106	1.71643	18.6033	1.97614e-06	0.028337	0.674619	0.780772	0.783077	0.893198	NA	NA
cg13100449	1.41486	0.897223	0.78553	0.629328	0.111693	0.517634	-1.221	18.5964	1.98222e-06	0.028337	0.395732	0.240966	0.269292	0.210481	NA	NA
cg05634256	-1.74309	-0.425657	-0.0518927	-1.6912	-0.373764	-1.31743	0.464747	18.5847	1.99248e-06	0.028337	0.532837	0.480532	0.589728	0.797786	NA	NA
cg14009688	-1.86462	-0.665052	-0.0181903	-1.84643	-0.646862	-1.19957	-0.860272	18.4278	2.13575e-06	0.028337	0.288928	0.315733	0.398096	0.580427	p1	CALD1
cg04144379	1.74142	0.362623	-0.0271983	1.76862	0.389822	1.3788	-0.708402	18.4215	2.14166e-06	0.028337	0.426142	0.483179	0.370626	0.18302	p	IQGAP2
cg06742101	-1.71612	-0.526932	-0.887668	-0.828451	0.360736	-1.18919	-2.57284	18.4026	2.1597e-06	0.028337	0.107712	0.184203	0.154683	0.277647	p2	SEMA3E
cg24482314	-1.32391	-0.800661	-0.510496	-0.813414	-0.290165	-0.523249	-0.0593288	18.373	2.18832e-06	0.028337	0.416901	0.464239	0.530137	0.669244	NA	NA
cg14006804	-1.97159	-0.172037	-0.318763	-1.65282	0.146726	-1.79955	0.296561	18.3117	2.2489e-06	0.028337	0.480245	0.559064	0.546964	0.758345	NA	NA
cg22449811	1.29432	0.629823	0.127032	1.16729	0.502791	0.664496	0.279097	18.3077	2.25294e-06	0.028337	0.61807	0.578825	0.513156	0.357076	NA	NA
cg01966066	-1.34803	-0.656526	-0.00902723	-1.339	-0.647498	-0.691503	-0.035748	18.2269	2.33562e-06	0.028337	0.43111	0.412408	0.535076	0.696371	NA	NA
cg01778667	-1.76426	-0.347994	0.309552	-2.07382	-0.657547	-1.41627	0.414753	18.2266	2.33593e-06	0.028337	0.524485	0.471111	0.576227	0.80277	NA	NA
cg17744933	-1.297	-0.828361	-0.207333	-1.08966	-0.621027	-0.468635	-0.0444139	18.2143	2.34883e-06	0.028337	0.405124	0.459935	0.556533	0.644207	NA	NA
cg12037815	-1.51641	-0.527595	-0.0273481	-1.48906	-0.500247	-0.988811	1.23232	18.1949	2.36929e-06	0.028337	0.633019	0.677009	0.713736	0.853359	NA	NA
cg09607085	-1.57926	-0.518397	-0.0249391	-1.55433	-0.493458	-1.06087	0.121626	18.1607	2.40586e-06	0.028337	0.463961	0.44873	0.550384	0.714545	NA	NA
cg04976330	-1.44053	-0.385248	-0.118812	-1.32172	-0.266437	-1.05528	-0.821377	18.117	2.45351e-06	0.0284395	0.311656	0.324248	0.383296	0.55455	NA	NA
cg10033433	-1.48194	-0.050756	0.280863	-1.7628	-0.331619	-1.43118	0.75184	17.9976	2.58898e-06	0.0285477	0.601891	0.540503	0.616558	0.81299	NA	NA
cg18889790	-1.71656	-0.547095	-0.371712	-1.34485	-0.175383	-1.16946	-0.931461	17.9885	2.59957e-06	0.0285477	0.279499	0.347626	0.364141	0.5709	NA	NA
cg09760574	-1.47316	-0.67407	-0.452806	-1.02035	-0.221264	-0.799087	-0.523405	17.977	2.61313e-06	0.0285477	0.336105	0.389737	0.449275	0.615448	NA	NA
cg08243711	-1.42969	-0.64971	-0.0677409	-1.36195	-0.581969	-0.779983	-0.107126	17.9538	2.64067e-06	0.0285477	0.408993	0.440002	0.521867	0.671764	NA	NA
cg17949057	1.90332	0.463941	0.471413	1.43191	-0.00747247	1.43938	0.557027	17.9391	2.65831e-06	0.0285477	0.664754	0.581826	0.591267	0.344593	p	CYTIP
cg10660666	-1.85139	-0.706968	-0.846581	-1.00481	0.139613	-1.14442	1.24881	17.8281	2.79538e-06	0.0295847	0.614408	0.724603	0.722852	0.849221	NA	NA
cg03148946	-1.87849	-0.309135	-0.2651	-1.61339	-0.0440356	-1.56935	-0.180477	17.7766	2.86153e-06	0.0297638	0.401248	0.463043	0.48718	0.671022	NA	NA
cg23039677	1.75341	0.445972	0.0364259	1.71698	0.409546	1.30743	0.659441	17.709	2.95089e-06	0.0297638	0.668524	0.654954	0.598715	0.367207	NA	NA
cg18509071	-1.42545	-0.794415	-0.157145	-1.2683	-0.63727	-0.631034	0.717223	17.648	3.03427e-06	0.0297638	0.549865	0.537385	0.660793	0.799981	NA	NA
cg05801066	-1.49779	-0.596916	-0.0143833	-1.48341	-0.582533	-0.900876	1.40694	17.6392	3.04655e-06	0.0297638	0.658069	0.694861	0.743549	0.866492	NA	NA
cg10801009	-1.73602	-0.618764	-0.121826	-1.61419	-0.496937	-1.11725	0.592603	17.6273	3.06305e-06	0.0297638	0.52511	0.536933	0.626871	0.809334	NA	NA
cg12756996	-1.80136	-0.572322	-0.104144	-1.69721	-0.468178	-1.22903	1.13224	17.6214	3.07141e-06	0.0297638	0.613878	0.63321	0.700335	0.860233	NA	NA
cg06254629	-1.83044	0.10256	0.237579	-2.06802	-0.135018	-1.933	-0.681042	17.6028	3.0976e-06	0.0297638	0.363374	0.332933	0.367268	0.615894	NA	NA
cg09947379	-1.44242	-0.416125	0.18073	-1.62315	-0.596855	-1.0263	0.512297	17.5319	3.20005e-06	0.0300057	0.537423	0.505315	0.603985	0.783635	NA	NA
cg12054653	-0.655089	-0.881923	-0.443127	-0.211962	-0.438796	0.226835	-1.24776	17.4981	3.25002e-06	0.0300057	0.240467	0.284519	0.368877	0.31937	NA	NA
cg21446955	-2.11189	-0.783719	-0.711725	-1.40016	-0.0719949	-1.32817	-1.41908	17.4802	3.2769e-06	0.0300057	0.20721	0.25435	0.308656	0.505968	p21	ARHGAP24
cg16719830	-1.30985	-0.739155	-0.266602	-1.04325	-0.472553	-0.570694	-0.783559	17.4734	3.28714e-06	0.0300057	0.300326	0.327776	0.413348	0.557457	NA	NA
cg17354291	-1.84628	-0.194441	0.318812	-2.16509	-0.513253	-1.65184	2.34761	17.4201	3.36892e-06	0.0302296	0.794734	0.77665	0.843085	0.898212	NA	NA
cg06350853	-1.59529	-0.685428	-0.289852	-1.30543	-0.395576	-0.909858	-0.21658	17.4037	3.39446e-06	0.0302296	0.395162	0.383326	0.494496	0.709591	NA	NA
cg08644311	-1.86752	-0.316187	-0.306595	-1.56092	-0.00959261	-1.55133	0.905211	17.3299	3.51215e-06	0.0305526	0.587281	0.650375	0.645129	0.834725	NA	NA
cg05276753	-1.73309	-0.856803	-0.206192	-1.5269	-0.650611	-0.876287	-0.208415	17.305	3.55282e-06	0.0305526	0.390855	0.37676	0.508734	0.702668	NA	NA
cg26274662	-1.56296	-0.546237	-0.216239	-1.34672	-0.329998	-1.01672	-1.62439	17.3029	3.55625e-06	0.0305526	0.200567	0.215137	0.266659	0.443504	NA	NA
cg22986793	-1.49569	-0.637362	-0.426562	-1.06913	-0.2108	-0.858327	-0.351731	17.2766	3.59999e-06	0.0305688	0.356739	0.460216	0.481103	0.597092	p	SLC9A3R2
cg15087376	-1.62357	-0.372127	0.126019	-1.74959	-0.498146	-1.25144	0.877132	17.2204	3.69508e-06	0.0310156	0.592604	0.580913	0.676998	0.791451	NA	NA
cg24380514	-1.61638	-0.099598	-0.0411893	-1.57519	-0.0584087	-1.51678	2.62742	17.1551	3.80905e-06	0.0316089	0.841837	0.842684	0.850295	0.913334	NA	NA
cg15006682	-1.60818	-0.668117	-0.192085	-1.4161	-0.476032	-0.940065	0.160507	17.1007	3.90683e-06	0.032056	0.450887	0.482487	0.559747	0.741977	NA	NA
cg21094122	-1.51089	-0.741102	-0.448643	-1.06225	-0.292459	-0.769792	0.553607	17.0562	3.98889e-06	0.0321537	0.516877	0.538926	0.619465	0.761596	p5	TRAK2
cg06532789	-1.45941	-0.476911	-0.0565937	-1.40282	-0.420317	-0.982502	-0.865243	17.0466	4.0068e-06	0.0321537	0.296896	0.332005	0.385422	0.531467	NA	NA
cg08482167	-1.15985	-0.868727	-0.299529	-0.860322	-0.569198	-0.291124	0.38361	17.0173	4.06212e-06	0.0322434	0.481792	0.52772	0.625987	0.70035	NA	NA
cg00598772	1.88588	0.493299	0.743914	1.14196	-0.250615	1.39258	1.05071	16.9657	4.16166e-06	0.0326744	0.747093	0.585732	0.648649	0.505756	NA	NA
cg17382198	-1.62833	-1.12724	-0.727512	-0.900815	-0.399728	-0.501087	-3.09553	16.9258	4.24031e-06	0.0326744	0.0699158	0.119295	0.156328	0.168379	p1	STL
cg18932726	-0.874769	-1.51085	-0.464405	-0.410365	-1.04645	0.636081	-1.94087	16.9206	4.25065e-06	0.0326744	0.134796	0.241008	0.337856	0.240215	p1	DOCK1
cg22260478	-1.29477	-0.584027	-0.382864	-0.911905	-0.201164	-0.710741	-0.827897	16.875	4.34295e-06	0.0327664	0.30025	0.351951	0.38743	0.531865	p1	CTGF
cg25323690	-1.78214	-0.630717	-0.184731	-1.59741	-0.445986	-1.15142	0.0568546	16.8704	4.35236e-06	0.0327664	0.430257	0.447979	0.545404	0.745973	NA	NA
cg17996401	-1.33771	-0.606511	-0.0606777	-1.27703	-0.545833	-0.731197	-1.30909	16.7989	4.50154e-06	0.0331453	0.234995	0.253198	0.320658	0.473091	NA	NA
cg12191789	1.47707	0.723816	0.486605	0.99047	0.237211	0.753259	1.96835	16.7974	4.50469e-06	0.0331453	0.845117	0.795	0.759852	0.657249	NA	NA
cg13510849	-2.10776	-0.780016	-0.211261	-1.8965	-0.568755	-1.32775	0.446025	16.7815	4.53886e-06	0.0331453	0.485657	0.513178	0.621534	0.789762	NA	NA
cg15802242	-1.56231	-0.541896	-0.0584002	-1.50391	-0.483496	-1.02041	-0.391124	16.7457	4.61624e-06	0.0332448	0.372047	0.382141	0.459836	0.65004	NA	NA
cg24587800	-1.78073	-0.45746	-0.0980735	-1.68266	-0.359387	-1.32327	1.24785	16.7333	4.64353e-06	0.0332448	0.640165	0.646906	0.71668	0.867534	NA	NA
cg00104303	-1.32482	-0.942364	-0.27311	-1.05171	-0.669254	-0.382453	-2.28091	16.6454	4.8411e-06	0.0339164	0.129247	0.144341	0.215287	0.294462	NA	NA
cg07109453	-1.6736	-0.533303	-0.284565	-1.38903	-0.248738	-1.14029	-0.788116	16.6115	4.91979e-06	0.0339164	0.286343	0.383094	0.40221	0.589704	NA	NA
cg07964754	1.83827	0.688659	-0.0219466	1.86022	0.710606	1.14962	1.02938	16.6075	4.92931e-06	0.0339164	0.732191	0.729661	0.62767	0.447411	NA	NA
cg02131674	-1.76667	-0.606873	-0.630128	-1.13654	0.0232551	-1.15979	-0.49632	16.5943	4.96029e-06	0.0339164	0.347191	0.426298	0.460242	0.560587	NA	NA
cg27514608	-1.78986	-0.618934	-0.617865	-1.17199	-0.00106885	-1.17092	-0.384608	16.5904	4.96955e-06	0.0339164	0.360159	0.419496	0.465238	0.63605	NA	NA
cg03438097	1.45493	0.559596	0.0248006	1.43013	0.534795	0.89533	1.98008	16.565	5.03011e-06	0.0340118	0.835779	0.820182	0.772888	0.643828	NA	NA
cg16861615	1.54546	0.514121	0.325282	1.22018	0.188839	1.03134	0.798003	16.491	5.21079e-06	0.0344844	0.707775	0.577087	0.620779	0.440808	NA	NA
cg20332143	-1.6737	-0.210096	-0.190717	-1.48298	-0.0193791	-1.46361	2.14009	16.4886	5.21689e-06	0.0344844	0.764332	0.816134	0.811339	0.90555	NA	NA
cg22500906	-1.34165	-0.559676	-0.137171	-1.20448	-0.422505	-0.781977	1.40537	16.4753	5.25014e-06	0.0344844	0.670181	0.687889	0.743998	0.843438	NA	NA
cg01944958	-1.57814	0.156738	0.298955	-1.87709	-0.142217	-1.73488	-2.26717	16.4362	5.34931e-06	0.0344844	0.163796	0.150267	0.15459	0.356167	NA	NA
cg26439401	1.45395	0.754272	0.659044	0.79491	0.0952279	0.699682	1.24022	16.386	5.47982e-06	0.0344844	0.761004	0.703511	0.664066	0.527252	NA	NA
cg20099416	0.0868279	1.2429	0.740026	-0.653198	0.502874	-1.15607	-1.78379	16.384	5.48507e-06	0.0344844	0.306618	0.198683	0.161098	0.262689	p1	MAPT
cg07834574	2.56938	-0.0752202	-0.334012	2.90339	0.258792	2.6446	-0.601879	16.3805	5.49426e-06	0.0344844	0.466406	0.399888	0.444933	0.16658	p1,p1	C17ORF107,CHRNE
cg09092280	-1.61499	-0.746083	-0.197461	-1.41753	-0.548622	-0.868908	-1.35618	16.3742	5.51073e-06	0.0344844	0.221388	0.243914	0.322471	0.490739	NA	NA
cg22274117	1.50257	0.515788	0.0976903	1.40488	0.418098	0.986784	-0.506093	16.3494	5.57704e-06	0.0344844	0.48645	0.448499	0.392484	0.249314	NA	NA
cg25525861	0.468597	0.886493	0.165214	0.303383	0.721278	-0.417895	2.56214	16.3416	5.59798e-06	0.0344844	0.885271	0.866326	0.81152	0.829446	NA	NA
cg16490015	-1.74739	-0.3207	-0.072865	-1.67452	-0.247835	-1.42669	0.0796772	16.2975	5.71801e-06	0.0344844	0.476213	0.415719	0.514782	0.752699	NA	NA
cg10421194	-1.645	-0.352049	-0.234646	-1.41035	-0.117402	-1.29295	-0.00514226	16.2954	5.72391e-06	0.0344844	0.443335	0.448079	0.505226	0.73375	NA	NA
cg00448868	-1.0735	-0.998883	-0.228661	-0.844843	-0.770222	-0.0746206	-0.926412	16.2826	5.75926e-06	0.0344844	0.283549	0.276969	0.420924	0.47521	NA	NA
cg24032265	2.36802	0.557928	0.0565766	2.31145	0.501351	1.8101	0.383408	16.2819	5.76112e-06	0.0344844	0.661092	0.567034	0.531531	0.295416	p2	MIR1204
cg26530706	-1.57534	-0.697729	-0.928211	-0.647129	0.230481	-0.87761	-1.05945	16.2011	5.99045e-06	0.0349083	0.274839	0.363996	0.329316	0.53935	p4	DTNA
cg13314012	-1.66513	-0.713087	-0.0900273	-1.5751	-0.62306	-0.952043	0.390448	16.1869	6.0317e-06	0.0349083	0.485367	0.479748	0.603146	0.798008	NA	NA
cg16924702	-1.43494	-1.02022	-0.369396	-1.06554	-0.65082	-0.414724	-1.69503	16.1653	6.09495e-06	0.0349083	0.179424	0.21534	0.285051	0.398625	p1	EPB41L3
cg25954397	-1.39109	-0.760151	-0.637722	-0.753369	-0.122429	-0.630939	0.119296	16.1617	6.10576e-06	0.0349083	0.437007	0.511569	0.563669	0.681045	NA	NA
cg18233931	-1.64577	-0.426588	-0.190138	-1.45564	-0.23645	-1.21919	-0.381785	16.1361	6.18203e-06	0.0349083	0.370793	0.395	0.458175	0.655173	NA	NA
cg20533403	-1.71517	-0.529196	-0.188226	-1.52695	-0.340971	-1.18598	-1.26853	16.1272	6.20886e-06	0.0349083	0.243868	0.266087	0.310221	0.521805	NA	NA
cg27427610	-1.5411	-0.357412	-0.131704	-1.4094	-0.225708	-1.18369	0.968556	16.1264	6.21104e-06	0.0349083	0.600927	0.639746	0.658421	0.842116	NA	NA
cg02268535	-2.023	-0.222879	0.0461699	-2.06917	-0.269049	-1.80012	-0.093212	16.1253	6.21436e-06	0.0349083	0.458291	0.390618	0.47607	0.726259	NA	NA
cg20806182	-1.14489	-0.529703	-0.776531	-0.368361	0.246828	-0.615189	0.851924	16.0843	6.33955e-06	0.0349363	0.573725	0.672021	0.633067	0.798743	NA	NA
cg24319623	1.78201	0.557005	0.241784	1.54023	0.315221	1.225	1.37052	16.0793	6.35488e-06	0.0349363	0.778703	0.699051	0.690735	0.501134	NA	NA
cg20285026	-2.10083	-0.518742	-0.731077	-1.36975	0.212336	-1.58208	0.444816	16.0698	6.38427e-06	0.0349363	0.488332	0.589333	0.581865	0.802997	NA	NA
cg24130893	-1.13556	-0.760764	-0.542283	-0.593273	-0.21848	-0.374793	1.48436	16.0539	6.43389e-06	0.0349363	0.672956	0.725353	0.761704	0.82551	NA	NA
cg23942041	-1.62136	-0.477449	0.0670786	-1.68844	-0.544527	-1.14391	0.328135	16.0355	6.49172e-06	0.0349363	0.503679	0.454934	0.582699	0.764749	NA	NA
cg17282981	-1.20231	-0.745436	-0.163145	-1.03917	-0.582291	-0.456877	-0.779689	16.0309	6.50638e-06	0.0349363	0.302785	0.322867	0.43115	0.488769	NA	NA
cg10781087	-1.73526	-0.379709	0.267495	-2.00275	-0.647204	-1.35555	0.256732	16.0151	6.55655e-06	0.0349486	0.489561	0.454933	0.560484	0.776025	NA	NA
cg01702055	1.39719	0.165455	0.474445	0.922745	-0.30899	1.23174	0.17858	15.9772	6.67893e-06	0.0353347	0.586136	0.475594	0.549563	0.321208	NA	NA
cg08416723	0.0219095	-1.21481	-1.45651	1.47842	0.241704	1.23672	-1.96819	15.9591	6.73822e-06	0.0353347	0.150533	0.325683	0.262261	0.171836	p1	C3orf25
cg07721499	-1.707	-0.636091	-0.39531	-1.31169	-0.240781	-1.07091	-1.27577	15.9265	6.84648e-06	0.0353347	0.229789	0.287162	0.318927	0.511965	NA	NA
cg16131257	-1.37721	-0.55833	-0.129349	-1.24786	-0.42898	-0.81888	0.727624	15.9188	6.87227e-06	0.0353347	0.567762	0.538675	0.643924	0.806956	NA	NA
cg06499262	1.88038	0.567365	0.111949	1.76843	0.455416	1.31301	0.372185	15.9061	6.91511e-06	0.0353347	0.629798	0.631575	0.538613	0.29863	p	NFAT5
cg13081009	-1.11405	-0.96495	-1.08438	-0.0296717	0.119432	-0.149104	0.983194	15.8935	6.95792e-06	0.0353347	0.577559	0.709343	0.691656	0.75197	NA	NA
cg00556557	2.06412	0.270512	-0.266179	2.3303	0.53669	1.79361	-0.131127	15.8906	6.96768e-06	0.0353347	0.541462	0.538964	0.46897	0.230989	NA	NA
cg18286127	-1.61192	0.0892632	0.219679	-1.8316	-0.130416	-1.70118	1.6448	15.8552	7.08962e-06	0.0355489	0.73281	0.743344	0.732241	0.876946	NA	NA
cg05270710	-1.37579	-0.403627	0.145168	-1.52095	-0.548795	-0.972158	1.63774	15.8502	7.10728e-06	0.0355489	0.705228	0.703854	0.778086	0.863443	NA	NA
cg12521353	-1.225	-0.866202	-0.708755	-0.516248	-0.157448	-0.3588	-1.76499	15.8272	7.18791e-06	0.0356674	0.171263	0.25382	0.274034	0.338781	p1	TFAP2C
cg00365749	-1.23593	-0.660211	-0.313082	-0.922853	-0.34713	-0.575724	-0.351868	15.7974	7.29377e-06	0.0356674	0.36796	0.411337	0.482169	0.615621	NA	NA
cg03347719	-0.723123	-0.958898	-0.555426	-0.167696	-0.403472	0.235776	-0.0134521	15.7834	7.34406e-06	0.0356674	0.421433	0.472432	0.558714	0.610269	p16	CRIP2
cg23480254	-1.4457	-0.497931	-0.198099	-1.2476	-0.299832	-0.947768	-0.106967	15.7779	7.36415e-06	0.0356674	0.418062	0.449277	0.521815	0.627057	NA	NA
cg04298470	-1.83993	-0.791177	-0.392103	-1.44782	-0.399074	-1.04875	-1.26989	15.7577	7.43774e-06	0.0356674	0.225668	0.27167	0.343593	0.490088	p1	AK123925
cg07019817	-1.70799	-0.589466	-0.153186	-1.55481	-0.43628	-1.11853	-0.0843687	15.7464	7.47926e-06	0.0356674	0.416983	0.420478	0.524569	0.690353	NA	NA
cg13868625	1.44808	0.501415	-0.0652046	1.51329	0.56662	0.946669	0.255584	15.74	7.50296e-06	0.0356674	0.618622	0.550339	0.510721	0.36018	NA	NA
cg16394702	-1.85149	-0.311284	0.106529	-1.95802	-0.417813	-1.54021	0.413609	15.7349	7.52171e-06	0.0356674	0.518232	0.484037	0.579219	0.791803	NA	NA
cg10334750	-1.07884	-0.739266	-0.221825	-0.857015	-0.517441	-0.339574	0.995886	15.7068	7.6267e-06	0.0356775	0.597655	0.600554	0.699453	0.811074	p9	RNF19A
cg09039561	-1.44867	-0.483893	-0.124635	-1.32403	-0.359258	-0.964775	0.206374	15.7043	7.63609e-06	0.0356775	0.471886	0.493442	0.56005	0.726549	NA	NA
cg20063241	-1.5607	-0.540062	-0.361084	-1.19962	-0.178979	-1.02064	0.734518	15.6952	7.67041e-06	0.0356775	0.558322	0.580079	0.640627	0.804826	NA	NA
cg22795331	1.62397	0.604591	0.610526	1.01344	-0.0059351	1.01938	1.15413	15.6468	7.85611e-06	0.0362628	0.770478	0.617878	0.650483	0.513958	NA	NA
cg01300852	-1.63054	-0.523997	-0.292246	-1.33829	-0.231751	-1.10654	-0.222534	15.6367	7.89556e-06	0.0362628	0.395089	0.434784	0.483754	0.669963	NA	NA
cg24645635	-1.80215	-0.58154	0.587939	-2.39008	-1.16948	-1.2206	1.28921	15.5982	8.04777e-06	0.0367309	0.658029	0.569734	0.731603	0.880718	NA	NA
cg24193140	-1.54164	-0.551795	-0.167864	-1.37378	-0.383931	-0.989847	0.632946	15.56	8.20145e-06	0.0370777	0.54387	0.558019	0.632006	0.786165	NA	NA
cg10207928	-1.77709	-0.146506	0.112941	-1.89003	-0.259447	-1.63058	-0.688012	15.5542	8.2253e-06	0.0370777	0.337887	0.342265	0.384337	0.630857	NA	NA
cg16851155	-1.7766	-0.81358	-0.193456	-1.58314	-0.620124	-0.963019	0.320801	15.539	8.28762e-06	0.0370931	0.472087	0.452134	0.600111	0.787187	NA	NA
cg26052187	-0.876564	-0.8433	-0.573497	-0.303066	-0.269803	-0.0332636	0.0323742	15.5198	8.3671e-06	0.0370931	0.429271	0.49436	0.555677	0.633804	NA	NA
cg04153551	-2.09734	-0.523417	0.29077	-2.38811	-0.814187	-1.57393	0.297446	15.5164	8.38111e-06	0.0370931	0.489534	0.402528	0.575594	0.824123	NA	NA
cg02638567	2.11352	0.19184	0.224036	1.88949	-0.0321962	1.92168	1.75982	15.4428	8.69416e-06	0.0374619	0.806553	0.755516	0.773298	0.514503	NA	NA
cg15676292	-1.40695	-0.510229	-0.228711	-1.17824	-0.281518	-0.89672	-0.195973	15.4402	8.70573e-06	0.0374619	0.404451	0.443102	0.494723	0.641509	NA	NA
cg12494541	-1.20617	-0.843552	-0.0327127	-1.17346	-0.810839	-0.362616	-0.219851	15.4285	8.75637e-06	0.0374619	0.3955	0.358214	0.528745	0.635959	NA	NA
cg08326647	-0.888327	-0.688388	-0.0701856	-0.818142	-0.618202	-0.199939	-0.947921	15.4227	8.78211e-06	0.0374619	0.287274	0.299501	0.396833	0.457052	NA	NA
cg10773047	-1.23073	-0.903134	-0.741826	-0.488902	-0.161309	-0.327593	0.0289567	15.4213	8.78827e-06	0.0374619	0.419828	0.488337	0.566687	0.627202	NA	NA
cg10373917	-1.73898	-0.62707	0.115945	-1.85492	-0.743016	-1.11191	1.37643	15.4052	8.8589e-06	0.0374619	0.651678	0.680564	0.73795	0.862822	NA	NA
cg10014443	1.35093	0.474707	0.262727	1.08821	0.21198	0.876227	0.532576	15.3892	8.9303e-06	0.0374619	0.653611	0.587952	0.5745	0.393929	NA	NA
cg01894366	-1.72928	-0.312882	-0.151129	-1.57815	-0.161753	-1.4164	1.09101	15.3785	8.97814e-06	0.0374619	0.631004	0.611312	0.670315	0.850057	NA	NA
cg11523350	-1.68036	-0.251469	-0.153393	-1.52696	-0.0980763	-1.42889	1.55807	15.3781	8.98003e-06	0.0374619	0.707673	0.698853	0.728422	0.897856	NA	NA
cg10093938	-1.35517	-0.807357	-0.438015	-0.917159	-0.369342	-0.547817	-0.929167	15.3609	9.05776e-06	0.0374619	0.269063	0.321535	0.40447	0.516032	NA	NA
cg14918359	-1.34742	-0.239298	0.100277	-1.4477	-0.339575	-1.10812	-0.393192	15.3543	9.0875e-06	0.0374619	0.397687	0.365933	0.437425	0.638299	NA	NA
cg11135108	-1.47461	-0.122702	0.188295	-1.6629	-0.310997	-1.35191	0.651895	15.3497	9.10848e-06	0.0374619	0.590311	0.513389	0.599172	0.801278	NA	NA
cg01346596	-1.67164	0.103865	0.272566	-1.9442	-0.168701	-1.7755	1.78267	15.3309	9.19478e-06	0.0374619	0.752752	0.754557	0.74702	0.881001	NA	NA
cg17414101	1.56415	0.472698	0.168232	1.39591	0.304466	1.09145	1.29075	15.3271	9.21224e-06	0.0374619	0.748877	0.747787	0.68266	0.534687	NA	NA
cg21152753	-1.15784	-0.721324	-0.180381	-0.977456	-0.540943	-0.436513	-0.880884	15.3224	9.23392e-06	0.0374619	0.296656	0.2985	0.394658	0.535682	NA	NA
cg00869285	1.51921	0.67386	-0.115056	1.63426	0.788916	0.845347	-3.06123	15.3069	9.30591e-06	0.0375453	0.14606	0.13451	0.0911287	0.0640455	p1	ZNF837
cg26591579	-1.65835	-0.430993	0.31132	-1.96967	-0.742313	-1.22736	-0.0834781	15.2647	9.50543e-06	0.0376258	0.409758	0.462517	0.512011	0.687447	NA	NA
cg13943460	-1.24581	-0.502414	-0.280327	-0.965487	-0.222087	-0.7434	-0.757579	15.2646	9.50592e-06	0.0376258	0.316225	0.391626	0.394482	0.50628	p	QKI
cg23484124	-1.21385	-0.523361	-0.281489	-0.932362	-0.241872	-0.69049	0.601291	15.262	9.51834e-06	0.0376258	0.546269	0.558859	0.616795	0.779343	NA	NA
cg25504717	1.34461	0.658382	0.324722	1.01988	0.33366	0.686224	0.00356228	15.2456	9.59736e-06	0.0376258	0.582159	0.517699	0.456796	0.349983	p	TBC1D1
cg15757806	-1.30186	-0.814185	-0.713403	-0.588459	-0.100782	-0.487677	-0.493633	15.2328	9.65938e-06	0.0376258	0.332358	0.435756	0.459389	0.579005	p	RBMS3
cg15564347	-1.57424	-0.643505	-0.426566	-1.14768	-0.216939	-0.930739	-0.420226	15.2285	9.67999e-06	0.0376258	0.368843	0.37847	0.45805	0.623905	p5	TMEM53
cg19078430	-0.787077	-0.689722	-1.04998	0.262903	0.360258	-0.097355	1.63639	15.2272	9.68651e-06	0.0376258	0.696364	0.785106	0.764865	0.747227	NA	NA
cg07285814	-1.34844	-0.490786	0.396124	-1.74456	-0.88691	-0.85765	1.38382	15.1872	9.88367e-06	0.0381885	0.682115	0.592132	0.753697	0.844888	NA	NA
cg06267617	-1.65893	-0.66595	0.0380469	-1.69698	-0.703997	-0.992983	-0.0372471	15.1452	1.00953e-05	0.0387015	0.427146	0.391716	0.535686	0.718605	NA	NA
cg00216512	-1.22385	-0.579317	-0.276863	-0.946992	-0.302454	-0.644538	-0.343246	15.1346	1.01498e-05	0.0387015	0.375687	0.419729	0.477333	0.605092	NA	NA
cg01792524	-0.415456	-1.79593	-0.673461	0.258005	-1.12247	1.38047	-2.26827	15.129	1.01785e-05	0.0387015	0.122733	0.160311	0.304466	0.166473	p2	CDK20
cg13940444	-2.62995	-1.01176	-0.537844	-2.09211	-0.473911	-1.6182	-1.03573	15.1135	1.02587e-05	0.0387015	0.249843	0.275809	0.379465	0.634218	NA	NA
cg25925006	-1.96738	-0.418742	-0.14223	-1.82515	-0.276512	-1.54864	-1.85128	15.0936	1.03621e-05	0.0387015	0.177753	0.237764	0.24202	0.397936	p2	SOX5
cg10003302	-1.32266	-0.522545	-0.194721	-1.12794	-0.327824	-0.800114	0.699654	15.083	1.04183e-05	0.0387015	0.567255	0.545396	0.626499	0.79059	NA	NA
cg08640619	-1.45513	-0.667291	-0.134347	-1.32078	-0.532944	-0.787837	-0.689941	15.0806	1.0431e-05	0.0387015	0.309056	0.350708	0.434464	0.576077	NA	NA
cg14585331	-1.37461	-0.641646	-0.370261	-1.00435	-0.271385	-0.732966	-0.719486	15.0728	1.04721e-05	0.0387015	0.320385	0.331281	0.417263	0.555762	NA	NA
cg02992632	-1.76502	-0.390811	-0.084781	-1.68024	-0.30603	-1.37421	-2.2856	15.0641	1.05183e-05	0.0387015	0.144175	0.1676	0.172973	0.376808	p1	FGF12
cg08224159	-1.07811	-0.808636	-0.287043	-0.791068	-0.521592	-0.269476	-0.43077	15.0456	1.06175e-05	0.0387015	0.354644	0.406	0.480476	0.557878	p13	AKAP12
cg07582789	1.96809	0.892067	0.96173	1.00636	-0.0696626	1.07603	1.52509	15.043	1.06317e-05	0.0387015	0.821152	0.668701	0.704727	0.564229	NA	NA
cg09435541	-1.85102	-0.259069	-0.119851	-1.73116	-0.139217	-1.59195	0.563451	15.0391	1.06524e-05	0.0387015	0.536701	0.565136	0.591817	0.81213	NA	NA
cg14054883	0.927929	0.83603	0.534303	0.393626	0.301727	0.0918995	1.766	15.003	1.08496e-05	0.0388416	0.827601	0.75404	0.72499	0.700381	NA	NA
cg10784983	-1.3251	-0.489153	-0.538284	-0.786816	0.0491308	-0.835947	-0.473591	14.9982	1.08761e-05	0.0388416	0.366465	0.408413	0.434077	0.589647	NA	NA
cg14111605	-1.68744	-0.606863	0.021573	-1.70901	-0.628436	-1.08058	-0.0915289	14.9972	1.08815e-05	0.0388416	0.419045	0.392654	0.531293	0.69353	p	NCALD
cg24087887	-2.07132	-1.26966	-0.100772	-1.97055	-1.16889	-0.801661	-2.46375	14.9932	1.09037e-05	0.0388416	0.0981483	0.139138	0.231445	0.294874	p1	FREM2
cg23851860	-2.53216	0.383123	0.637671	-3.16983	-0.254548	-2.91529	-3.2934	14.9436	1.11829e-05	0.0394842	0.118286	0.103988	0.124301	0.326448	p1	ADAM19
cg25555844	1.22085	-0.113994	0.229996	0.990851	-0.34399	1.33484	0.966652	14.9419	1.11923e-05	0.0394842	0.695269	0.602661	0.685697	0.494268	NA	NA
cg24450239	-1.06011	-0.720049	-0.159779	-0.900327	-0.56027	-0.340057	0.535353	14.9137	1.13544e-05	0.039775	0.527157	0.516457	0.633676	0.743251	p9	RNF19A
cg03982537	1.39591	0.441413	1.03813	0.357776	-0.596718	0.954494	2.48864	14.9055	1.14018e-05	0.039775	0.88527	0.793184	0.839853	0.737627	NA	NA
cg00971332	-1.36588	-0.468968	-0.0469027	-1.31898	-0.422065	-0.896914	0.555696	14.8887	1.14999e-05	0.039775	0.548835	0.494512	0.612586	0.787697	NA	NA
cg10793371	-1.34448	-0.574674	-0.165183	-1.1793	-0.409492	-0.769808	0.96892	14.8777	1.15653e-05	0.039775	0.594163	0.632483	0.695165	0.789596	NA	NA
cg12055133	-1.49898	-0.602529	-0.0930371	-1.40594	-0.509492	-0.896452	0.737341	14.8762	1.15736e-05	0.039775	0.559093	0.561156	0.657982	0.791356	NA	NA
cg02645135	-1.16771	-1.21767	-0.956208	-0.211502	-0.26146	0.0499583	0.114286	14.8672	1.16274e-05	0.039775	0.409198	0.520544	0.596549	0.654861	NA	NA
cg20343746	-1.97474	-0.330162	-0.0851194	-1.88962	-0.245042	-1.64458	1.21255	14.8624	1.1656e-05	0.039775	0.638784	0.651201	0.696717	0.857905	NA	NA
cg22825646	-1.79011	-0.396662	-0.0159857	-1.77413	-0.380676	-1.39345	-0.0726063	14.8484	1.17394e-05	0.0398734	0.422599	0.438554	0.501508	0.734911	NA	NA
cg04131845	-1.43758	-0.472707	0.260679	-1.69825	-0.733386	-0.964868	-0.147177	14.8293	1.18549e-05	0.0400793	0.421159	0.396666	0.511838	0.649229	NA	NA
cg00450516	-0.495406	-1.00038	-0.280456	-0.21495	-0.719921	0.50497	3.04988	14.807	1.19911e-05	0.0400903	0.849189	0.889211	0.906769	0.922659	NA	NA
cg26289571	-1.57412	-0.634794	-0.453138	-1.12098	-0.181656	-0.939323	-0.179676	14.8	1.20343e-05	0.0400903	0.389377	0.475965	0.496524	0.667561	NA	NA
cg11665286	-1.19706	-0.541396	-0.643201	-0.553862	0.101805	-0.655667	1.50386	14.7986	1.20431e-05	0.0400903	0.675465	0.748952	0.748985	0.852697	NA	NA
cg05621401	-0.81551	0.0581867	1.15469	-1.9702	-1.09651	-0.873697	-0.953192	14.7821	1.21451e-05	0.0400903	0.339961	0.253109	0.356635	0.458035	NA	NA
cg04816699	-1.3399	-0.621632	-0.233826	-1.10607	-0.387806	-0.718264	-1.52557	14.7787	1.21665e-05	0.0400903	0.213931	0.226365	0.285771	0.440527	NA	NA
cg24523685	-1.2087	-0.0747442	0.693719	-1.90241	-0.768463	-1.13395	0.240188	14.7753	1.21876e-05	0.0400903	0.511844	0.429574	0.553426	0.733338	NA	NA
cg12059180	1.93362	0.669633	0.13071	1.80291	0.538924	1.26399	2.75969	14.7291	1.24806e-05	0.0408703	0.905801	0.879417	0.848139	0.715446	NA	NA
cg26035535	-1.71446	-0.0555377	0.428078	-2.14253	-0.483616	-1.65892	0.18774	14.7081	1.26157e-05	0.0411281	0.494851	0.448882	0.526447	0.766516	NA	NA
cg08517286	-0.695674	-1.2932	0.648342	-1.34402	-1.94154	0.597528	-3.13953	14.6889	1.27413e-05	0.0411442	0.0856236	0.0569644	0.167888	0.154635	p3	LRP12
cg16432835	-1.75018	-0.291269	0.141348	-1.89153	-0.432617	-1.45891	0.182699	14.6832	1.27788e-05	0.0411442	0.474491	0.455252	0.54899	0.752038	NA	NA
cg01081390	-1.34367	-0.229593	-0.264692	-1.07897	0.0350991	-1.11407	1.15892	14.6815	1.27896e-05	0.0411442	0.639992	0.705017	0.689827	0.811359	p6	PIGS
cg16053889	-1.70715	-0.716898	-0.352533	-1.35461	-0.364365	-0.990249	-0.473242	14.6669	1.28866e-05	0.0411602	0.353426	0.357262	0.460985	0.635252	NA	NA
cg08276755	-0.932977	-0.749543	0.0640649	-0.997041	-0.813608	-0.183433	-0.142126	14.6482	1.30115e-05	0.0411602	0.412729	0.400694	0.541485	0.591254	NA	NA
cg01199327	1.71006	0.667589	0.317817	1.39225	0.349772	1.04248	3.2077	14.6428	1.30479e-05	0.0411602	0.926339	0.906216	0.873112	0.812887	p	CD82
cg08127131	-1.54219	-0.398279	-0.196892	-1.3453	-0.201387	-1.14391	-1.83415	14.6067	1.32935e-05	0.0411602	0.19124	0.17923	0.22952	0.411854	NA	NA
cg09328012	-1.14904	-0.980668	-0.255711	-0.893334	-0.724958	-0.168376	-0.156553	14.6058	1.32993e-05	0.0411602	0.387516	0.402496	0.553534	0.623303	p2	LOC400931
cg15671466	-1.40588	-0.274148	-0.0748746	-1.331	-0.199274	-1.13173	0.736974	14.6024	1.3323e-05	0.0411602	0.577138	0.600371	0.609361	0.820838	NA	NA
cg06181286	1.44472	0.41251	0.591565	0.853153	-0.179055	1.03221	0.0653861	14.5989	1.33467e-05	0.0411602	0.573814	0.49151	0.509217	0.303194	NA	NA
cg15892176	1.35451	0.719621	0.436281	0.918232	0.28334	0.634892	2.19583	14.5933	1.33857e-05	0.0411602	0.861118	0.804661	0.792518	0.693744	NA	NA
cg12408364	-1.3556	-0.429449	-0.29917	-1.05643	-0.130279	-0.926152	-0.490534	14.5876	1.3425e-05	0.0411602	0.361993	0.389325	0.431026	0.61459	NA	NA
cg04135246	-2.30912	-0.416071	0.191305	-2.50042	-0.607376	-1.89305	-2.10212	14.5855	1.34401e-05	0.0411602	0.152885	0.163491	0.213501	0.434348	p1	ENST00000554862
cg22693837	1.49206	0.66563	0.216786	1.27527	0.448844	0.826428	1.14962	14.5829	1.3458e-05	0.0411602	0.742831	0.731597	0.654569	0.490724	NA	NA
cg23364497	-1.23558	-0.966375	-0.56891	-0.666668	-0.397464	-0.269204	-0.00891219	14.581	1.3471e-05	0.0411602	0.411638	0.467821	0.56196	0.641094	NA	NA
cg17235398	-1.59951	-0.437178	-0.0149753	-1.58454	-0.422203	-1.16234	1.33608	14.5626	1.36001e-05	0.0413816	0.658153	0.662967	0.717719	0.880528	NA	NA
cg04052038	-1.29659	-0.761069	0.370585	-1.66718	-1.13165	-0.535524	1.46156	14.5387	1.37695e-05	0.0414615	0.683165	0.608217	0.759212	0.872754	p1	CLDN8
cg08592212	-1.83155	-0.450906	0.113782	-1.94534	-0.564688	-1.38065	0.532936	14.5272	1.38521e-05	0.0414615	0.525351	0.51213	0.616509	0.794334	NA	NA
cg16415190	1.14108	0.380043	-0.280856	1.42194	0.6609	0.761038	2.03959	14.5197	1.39059e-05	0.0414615	0.833607	0.82142	0.782276	0.702728	p,p	RFFL,RAD51L3-RFFL
cg10415258	-1.87654	-0.431753	-0.264332	-1.61221	-0.167421	-1.44478	-0.626761	14.5072	1.39962e-05	0.0414615	0.328746	0.376865	0.400474	0.676549	NA	NA
cg16710506	-1.57653	-0.721066	-0.324985	-1.25154	-0.396081	-0.855461	1.4487	14.5068	1.3999e-05	0.0414615	0.662355	0.683745	0.76134	0.85769	NA	NA
cg12175038	-1.58745	-0.579194	-0.211717	-1.37573	-0.367476	-1.00826	-0.197419	14.4999	1.40498e-05	0.0414615	0.409365	0.39052	0.485699	0.708378	NA	NA
cg12310881	-1.13495	-0.538159	-0.0989491	-1.03601	-0.43921	-0.596795	-0.26998	14.4933	1.40977e-05	0.0414615	0.407625	0.405087	0.479141	0.607161	NA	NA
cg25784969	-1.53381	-0.66919	0.156194	-1.69	-0.825383	-0.864616	-0.458598	14.4858	1.41528e-05	0.0414615	0.351969	0.351881	0.476487	0.617637	NA	NA
cg21327055	-1.4312	-0.448652	-0.0658957	-1.36531	-0.382756	-0.982552	-0.384809	14.4723	1.42524e-05	0.0414615	0.378387	0.397834	0.458488	0.621009	NA	NA
cg23208271	-1.14315	-0.894904	-0.503624	-0.639524	-0.391281	-0.248243	-0.121361	14.4648	1.43084e-05	0.0414615	0.387718	0.472345	0.530399	0.653379	NA	NA
cg01721051	-1.56287	-0.128404	0.40294	-1.96581	-0.531344	-1.43447	0.976481	14.4503	1.44163e-05	0.0414615	0.639505	0.523911	0.656715	0.857062	NA	NA
cg02867709	-1.49982	-0.328059	0.0723041	-1.57213	-0.400363	-1.17176	0.707884	14.4362	1.4523e-05	0.0414615	0.588169	0.50976	0.620038	0.81251	NA	NA
cg26996145	1.36186	0.638152	0.434454	0.927404	0.203698	0.723705	1.5771	14.4331	1.45458e-05	0.0414615	0.803065	0.735921	0.714909	0.625197	NA	NA
cg20795965	-1.52732	-0.39281	-0.111423	-1.4159	-0.281387	-1.13451	0.526731	14.4274	1.45893e-05	0.0414615	0.529707	0.531326	0.606833	0.776824	NA	NA
cg13072717	1.63087	0.0935138	-0.239662	1.87053	0.333176	1.53735	-0.369985	14.4257	1.46026e-05	0.0414615	0.481169	0.492035	0.435514	0.247202	NA	NA
cg24423088	-1.83046	-0.474249	0.220928	-2.05138	-0.695177	-1.35621	1.30279	14.4252	1.46059e-05	0.0414615	0.65437	0.628377	0.732523	0.84661	p1	KRTAP8-1
cg13104335	-1.87382	-0.437123	-0.0399225	-1.83389	-0.397201	-1.43669	0.480513	14.4222	1.46293e-05	0.0414615	0.515262	0.532036	0.583289	0.82213	NA	NA
cg17853850	-1.45099	0.00999862	0.0153683	-1.46636	-0.00536972	-1.46099	-2.43246	14.4111	1.4714e-05	0.0414615	0.141514	0.15091	0.146568	0.300104	p10	VASH2
cg00730887	-1.69751	-0.521235	-0.113128	-1.58438	-0.408107	-1.17627	0.139426	14.4089	1.47309e-05	0.0414615	0.461843	0.452406	0.550352	0.737528	p4	RAPGEF2
cg19826754	-1.28517	-1.01333	-0.946377	-0.338797	-0.0669538	-0.271843	-0.638278	14.3979	1.48152e-05	0.0414615	0.30204	0.397062	0.458795	0.533663	NA	NA
cg02719518	-1.45871	-0.842951	-0.412054	-1.04666	-0.430897	-0.615762	-0.827552	14.3959	1.48306e-05	0.0414615	0.291814	0.324084	0.416289	0.530305	NA	NA
cg03006098	1.34613	0.778977	0.196209	1.14992	0.582767	0.567148	2.68776	14.3873	1.48977e-05	0.0414615	0.88471	0.884482	0.837537	0.768247	NA	NA
cg18098839	1.58524	0.647051	0.489179	1.09606	0.157871	0.938194	0.0151176	14.3829	1.49323e-05	0.0414615	0.599286	0.499301	0.465543	0.326151	p	GOLIM4
cg00913104	-1.28924	-0.677444	-0.692941	-0.596302	0.0154969	-0.611799	-0.797225	14.3603	1.51091e-05	0.0414733	0.302826	0.371739	0.400228	0.503758	NA	NA
cg11796233	-1.53061	-0.487525	-0.361929	-1.16868	-0.125597	-1.04308	0.785751	14.3362	1.53005e-05	0.0414733	0.569744	0.584282	0.647632	0.805254	NA	NA
cg16973111	-1.33759	-0.646014	-0.210374	-1.12722	-0.43564	-0.69158	-0.260273	14.3316	1.53373e-05	0.0414733	0.384212	0.43907	0.504649	0.581092	p	DLGAP1
cg19281310	1.59579	0.891959	0.590935	1.00486	0.301024	0.703833	-1.08092	14.328	1.53663e-05	0.0414733	0.453107	0.254903	0.276793	0.211353	p	IL12A-AS1
cg13207797	-2.22543	0.191765	-0.474727	-1.7507	0.666491	-2.4172	-2.38902	14.3276	1.53697e-05	0.0414733	0.146295	0.184625	0.12775	0.432548	p1	EPO
cg06486732	-1.66445	-0.472763	-0.289358	-1.3751	-0.183405	-1.19169	-1.44452	14.3262	1.53813e-05	0.0414733	0.216565	0.270272	0.287283	0.460007	NA	NA
cg12558347	-1.40958	-0.675585	-0.385925	-1.02366	-0.289661	-0.733999	-0.469956	14.3006	1.55886e-05	0.0414733	0.353116	0.387226	0.461365	0.589577	NA	NA
cg06781712	-1.73906	-0.492914	-0.21274	-1.52632	-0.280175	-1.24614	-1.86115	14.2817	1.57437e-05	0.0414733	0.197923	0.199765	0.232369	0.386438	p1	CDH18
cg03585720	-1.58309	-0.675675	-0.426562	-1.15653	-0.249113	-0.90742	0.131541	14.2648	1.58841e-05	0.0414733	0.448559	0.468286	0.554846	0.741557	NA	NA
cg15887690	-1.11352	-0.816305	-0.392092	-0.721425	-0.424213	-0.297212	1.19957	14.2619	1.59083e-05	0.0414733	0.618759	0.683711	0.721993	0.82711	NA	NA
cg14660446	-1.31576	-0.665598	-0.333126	-0.982638	-0.332472	-0.650166	-0.558279	14.249	1.60161e-05	0.0414733	0.342148	0.362526	0.446765	0.569272	NA	NA
cg05660670	-1.5271	-1.48005	-1.12782	-0.399276	-0.352223	-0.0470528	-2.74251	14.2447	1.60518e-05	0.0414733	0.0825852	0.146354	0.206597	0.222534	p12	PDE3A
cg21064449	-1.65073	-0.0525285	0.0376048	-1.68833	-0.0901332	-1.5982	2.63707	14.2443	1.60556e-05	0.0414733	0.824228	0.869458	0.853714	0.930178	NA	NA
cg12777871	-1.99163	-0.683541	-0.0299389	-1.96169	-0.653602	-1.30809	-0.776908	14.2442	1.60561e-05	0.0414733	0.310051	0.278883	0.409947	0.605428	NA	NA
cg11627314	-2.13721	0.23697	1.6735	-3.8107	-1.43653	-2.37418	-1.54173	14.2397	1.6094e-05	0.0414733	0.287831	0.137577	0.244462	0.62779	p1	HMCN2
cg06158471	-1.7323	-0.818512	-0.492628	-1.23967	-0.325884	-0.913784	-0.387308	14.2125	1.63263e-05	0.0414733	0.345389	0.434587	0.486603	0.622834	NA	NA
cg13746290	-1.69856	-0.497608	-0.178115	-1.52044	-0.319493	-1.20095	0.606838	14.2118	1.6332e-05	0.0414733	0.5368	0.565897	0.616443	0.802762	p3	HIP1
cg08421690	1.67321	-0.131871	-0.0600516	1.73326	-0.0718195	1.80508	2.13438	14.2088	1.63583e-05	0.0414733	0.829226	0.825129	0.828074	0.626367	NA	NA
cg09193477	-1.59327	-0.180319	-0.185896	-1.40737	0.00557689	-1.41295	1.47098	14.2053	1.63877e-05	0.0414733	0.683435	0.722318	0.738496	0.803035	NA	NA
cg19264599	-1.59918	-0.503242	-0.146919	-1.45226	-0.356323	-1.09594	0.183343	14.2032	1.6406e-05	0.0414733	0.474688	0.456719	0.536555	0.783462	NA	NA
cg16247408	-2.08872	-0.293791	-0.184354	-1.90437	-0.109438	-1.79493	0.069133	14.2003	1.64313e-05	0.0414733	0.462281	0.481207	0.523313	0.696634	NA	NA
cg00459695	-1.2568	-0.582023	-0.0380592	-1.21874	-0.543963	-0.674773	0.551502	14.1995	1.64385e-05	0.0414733	0.527795	0.556016	0.63669	0.72292	NA	NA
cg23078228	1.52439	0.161204	-0.245657	1.77005	0.406861	1.36319	1.34874	14.1989	1.64429e-05	0.0414733	0.752652	0.737059	0.719453	0.495892	NA	NA
cg08106279	-0.932779	-0.990969	-0.450753	-0.482026	-0.540216	0.0581902	0.416865	14.1977	1.64538e-05	0.0414733	0.483532	0.524479	0.640136	0.683632	NA	NA
cg03727561	-1.35344	-0.741476	-0.229303	-1.12413	-0.512173	-0.61196	0.491099	14.1787	1.66192e-05	0.0414733	0.505993	0.515159	0.629944	0.765762	NA	NA
cg01147106	-1.44879	-0.850819	-0.364995	-1.08379	-0.485824	-0.597966	0.171184	14.1764	1.66396e-05	0.0414733	0.449626	0.470423	0.574083	0.735814	NA	NA
cg22644852	-1.10486	-0.406516	0.116936	-1.2218	-0.523452	-0.698343	-0.238249	14.1751	1.6651e-05	0.0414733	0.4195	0.37025	0.475823	0.669899	NA	NA
cg02503796	-1.27619	-0.762201	-0.252141	-1.02405	-0.51006	-0.513986	-0.739616	14.1712	1.66851e-05	0.0414733	0.308607	0.336037	0.423316	0.548778	p1	KIAA0408
cg24790126	1.64723	0.506863	0.0582083	1.58902	0.448655	1.14037	1.02252	14.17	1.66958e-05	0.0414733	0.712548	0.741253	0.649704	0.420761	NA	NA
cg17394189	-1.76159	-0.778092	-0.263463	-1.49813	-0.514629	-0.983502	-0.135081	14.1656	1.6734e-05	0.0414733	0.387974	0.422346	0.526164	0.707277	NA	NA
cg19844718	-0.917883	-1.0487	-0.613683	-0.3042	-0.435014	0.130814	-1.30638	14.1624	1.67622e-05	0.0414733	0.225696	0.277967	0.352667	0.376715	NA	NA
cg10639643	-2.05671	-0.674187	-0.46518	-1.59153	-0.209007	-1.38253	-0.945001	14.1599	1.67848e-05	0.0414733	0.276289	0.348832	0.367301	0.599184	NA	NA
cg19211851	-1.31819	-0.538152	0.0509936	-1.36918	-0.589145	-0.780034	0.166752	14.1536	1.68406e-05	0.0414733	0.472436	0.465768	0.557152	0.70606	NA	NA
cg21010715	-2.19171	-0.688855	-0.0760517	-2.11566	-0.612804	-1.50285	0.648297	14.1506	1.68675e-05	0.0414733	0.513634	0.551317	0.629535	0.851247	NA	NA
cg13663116	-1.64271	-0.513182	-0.193347	-1.44937	-0.319835	-1.12953	-0.395878	14.137	1.69887e-05	0.0416205	0.367112	0.385641	0.45154	0.684299	NA	NA
cg08190175	-1.17303	-0.593642	-0.241819	-0.931214	-0.351823	-0.579391	-0.209469	14.1311	1.70413e-05	0.0416205	0.406147	0.421313	0.49506	0.634931	NA	NA
cg15493494	1.46549	0.486274	-0.1266	1.59209	0.612874	0.979213	2.98488	14.1078	1.72522e-05	0.0419675	0.911559	0.896409	0.86973	0.794218	NA	NA
cg24096763	-1.87234	-0.279524	0.241028	-2.11337	-0.520552	-1.59282	1.32515	14.1028	1.72983e-05	0.0419675	0.672166	0.605032	0.712151	0.894333	NA	NA
cg24786986	-1.2685	-0.66169	-0.398459	-0.870043	-0.263231	-0.606812	-0.0471258	14.0756	1.75482e-05	0.0421937	0.430573	0.431594	0.516666	0.70255	p4	FOXP2
cg12771257	-1.0262	-0.501259	-0.0505144	-0.975688	-0.450745	-0.524943	2.79432	14.0745	1.7559e-05	0.0421937	0.847434	0.851578	0.879338	0.931538	NA	NA
cg19319037	1.53005	0.610496	0.565806	0.964243	0.0446906	0.919552	1.34866	14.0702	1.75988e-05	0.0421937	0.783753	0.692863	0.685706	0.519359	p	TTF2
cg11820846	-1.69504	-0.451128	-0.413987	-1.28105	-0.0371409	-1.24391	-0.525511	14.0663	1.76349e-05	0.0421937	0.33636	0.4405	0.426429	0.620291	NA	NA
cg12036619	1.68038	0.404857	0.135435	1.54495	0.269423	1.27553	0.763624	14.0589	1.77045e-05	0.0421937	0.682602	0.642516	0.604313	0.447367	NA	NA
cg22551546	-1.38605	0.193515	0.637291	-2.02334	-0.443776	-1.57957	0.534516	14.0553	1.77382e-05	0.0421937	0.579487	0.51367	0.571843	0.754588	p9	WDR41
cg13883479	-1.19651	-0.515749	-0.584543	-0.611963	0.0687942	-0.680757	-0.383705	14.0339	1.79399e-05	0.0423078	0.367634	0.43772	0.454256	0.619299	NA	NA
cg04436877	-1.65623	-0.254139	-0.0236743	-1.63256	-0.230465	-1.40209	0.305526	14.0316	1.79624e-05	0.0423078	0.503078	0.504517	0.549267	0.771397	NA	NA
cg00329270	-1.94887	-1.04926	-0.494277	-1.4546	-0.554985	-0.89961	-1.86418	14.0278	1.7998e-05	0.0423078	0.160012	0.214777	0.273458	0.373709	p1	KY
cg18112555	-1.52511	-0.672586	0.0653376	-1.59045	-0.737923	-0.852528	1.01888	14.0212	1.80611e-05	0.0423078	0.599778	0.551028	0.688526	0.872447	NA	NA
cg00121876	1.38934	0.51816	0.243015	1.14632	0.275145	0.871177	1.82137	14.0197	1.80759e-05	0.0423078	0.822421	0.783976	0.759879	0.607862	NA	NA
cg17121176	1.17436	0.737137	0.223085	0.951277	0.514052	0.437225	-0.185025	14.0044	1.82233e-05	0.0424509	0.530004	0.525807	0.415967	0.354893	p7	SOBP
cg20207475	-1.74791	-0.139623	-0.0489375	-1.69898	-0.0906854	-1.60829	0.451772	14.0013	1.82533e-05	0.0424509	0.536247	0.526015	0.575682	0.75858	NA	NA
cg22793714	1.16232	0.272965	-0.560396	1.72271	0.833361	0.88935	0.972678	13.984	1.84215e-05	0.0425776	0.697525	0.716224	0.635184	0.504861	NA	NA
cg05805815	-0.877712	-0.949241	-0.150932	-0.72678	-0.79831	0.0715295	-0.747991	13.9837	1.84244e-05	0.0425776	0.305637	0.299312	0.453586	0.502956	NA	NA
cg13973325	1.50143	0.373929	0.644728	0.856707	-0.270799	1.12751	2.13835	13.9644	1.86148e-05	0.0428416	0.843311	0.776375	0.80278	0.697435	NA	NA
cg27543403	0.0290254	-0.953295	-0.503559	0.532585	-0.449736	0.98232	-2.56098	13.9579	1.86791e-05	0.0428416	0.120166	0.13867	0.192561	0.13158	p3	PDE4D
cg18900929	-1.24169	-0.526589	0.203726	-1.44542	-0.730315	-0.715104	-0.350072	13.9521	1.87365e-05	0.0428416	0.394523	0.34649	0.490258	0.570512	NA	NA
cg10221299	-1.83514	-0.513574	0.0963788	-1.93152	-0.609953	-1.32156	0.178181	13.9484	1.87733e-05	0.0428416	0.466287	0.438047	0.555882	0.775584	NA	NA
cg08629884	1.5021	0.623018	0.197215	1.30489	0.425804	0.879083	3.31991	13.9348	1.89099e-05	0.0430179	0.933689	0.895994	0.88099	0.859924	NA	NA
cg26745060	1.09185	0.74855	0.302434	0.789419	0.446116	0.343303	1.95068	13.929	1.89684e-05	0.0430179	0.839368	0.797961	0.752995	0.706251	NA	NA
cg08023500	-1.69696	-0.340266	-0.0579611	-1.639	-0.282305	-1.35669	-1.38059	13.9224	1.90349e-05	0.0430352	0.230989	0.265296	0.294961	0.471985	p1	ZNF385D
cg09875016	-1.5805	-0.57861	-0.101588	-1.47891	-0.477022	-1.00189	0.634933	13.8941	1.93242e-05	0.0435543	0.541059	13:12:56.090000	0.624942	0.804465	NA	NA
cg26491791	-0.431839	-1.25311	-1.32489	0.893049	0.0717823	0.821266	-1.30989	13.8769	1.9502e-05	0.0436886	0.207858	0.387125	0.372301	0.283722	p1	DOCK1
cg16111085	-1.12222	-0.904432	-0.499728	-0.622493	-0.404704	-0.217788	-0.148165	13.8768	1.95034e-05	0.0436886	0.399273	0.428854	0.52504	0.64529	NA	NA
cg02628855	-1.36125	-0.604871	-0.50807	-0.853182	-0.096801	-0.756381	0.0150432	13.8679	1.95968e-05	0.0437636	0.435342	0.486164	0.526915	0.686835	NA	NA
cg21986821	-1.90325	-0.0787798	0.419665	-2.32292	-0.498445	-1.82447	1.42698	13.8394	1.98968e-05	0.0441581	0.700913	0.619455	0.720993	0.891179	NA	NA
cg03902017	-1.51925	-0.38039	-0.3053	-1.21395	-0.0750897	-1.13886	0.169438	13.8272	2.0027e-05	0.0441581	0.462731	0.542451	0.54836	0.674524	NA	NA
cg09746554	-1.80263	-0.233642	-0.32973	-1.4729	0.0960872	-1.56899	1.45494	13.8261	2.0039e-05	0.0441581	0.678837	0.717792	0.712374	0.850985	NA	NA
cg19183619	-1.08354	-0.489164	0.12532	-1.20886	-0.614483	-0.594373	0.0332632	13.8186	2.01195e-05	0.0441581	0.458205	0.419587	0.546127	0.654515	NA	NA
cg25024734	-1.50659	-0.744172	0.0204275	-1.52702	-0.764599	-0.762422	-1.42895	13.8098	2.02149e-05	0.0441581	0.222499	0.207984	0.325361	0.427227	NA	NA
cg06748695	-1.97205	-0.828265	-0.79678	-1.17527	-0.0314858	-1.14379	-0.177403	13.8058	2.02581e-05	0.0441581	0.367689	0.497659	0.515266	0.669997	NA	NA
cg04176141	-1.67383	-0.595889	-0.308236	-1.36559	-0.287653	-1.07794	0.182174	13.8018	2.0301e-05	0.0441581	0.456089	0.510162	0.555642	0.736864	NA	NA
cg16109875	-1.74973	-0.289118	-0.27663	-1.4731	-0.0124878	-1.46061	0.478119	13.8012	2.03076e-05	0.0441581	0.531282	0.536611	0.574244	0.803102	NA	NA
cg05089197	-1.10979	-0.823205	-0.842168	-0.267626	0.0189635	-0.286589	0.00614379	13.7967	2.03568e-05	0.0441581	0.417176	0.526823	0.527169	0.686647	NA	NA
cg12674357	-1.7416	-0.509608	0.294614	-2.03621	-0.804222	-1.23199	-1.80892	13.7944	2.03823e-05	0.0441581	0.188614	0.176413	0.242938	0.433153	NA	NA
cg21817764	-1.56796	-0.237612	-0.0288504	-1.53911	-0.208762	-1.33035	-0.122318	13.7892	2.04386e-05	0.0441581	0.43269	0.424672	0.485506	0.694831	p1	LINC01489
cg02573357	-1.19772	-0.578391	-0.177722	-1.02	-0.400669	-0.619332	-1.36047	13.7552	2.08148e-05	0.0448382	0.23718	0.244696	0.314687	0.418493	NA	NA
cg08235271	-1.96132	-1.18045	-0.939561	-1.02176	-0.240894	-0.780862	-2.45271	13.7445	2.0935e-05	0.0448744	0.106195	0.16398	0.209106	0.336048	p2	ADGRL2
cg18477563	-1.19787	-0.750491	-0.650381	-0.547492	-0.10011	-0.447381	2.36593	13.7424	2.09577e-05	0.0448744	0.779649	0.834124	0.836495	0.915471	NA	NA
cg11376472	-1.22721	-0.582068	-0.236178	-0.99103	-0.345891	-0.645139	-0.87296	13.7373	2.10159e-05	0.0448744	0.304108	0.31551	0.381792	0.524072	NA	NA
cg08979862	-1.5782	0.171302	0.867119	-2.44532	-0.695817	-1.7495	-1.84293	13.7223	2.11858e-05	0.0449049	0.226081	0.16258	0.212643	0.392246	NA	NA
cg14185860	-1.41084	0.225128	0.820421	-2.23126	-0.595293	-1.63596	1.30462	13.7116	2.13079e-05	0.0449049	0.720935	0.575715	0.67869	0.85865	NA	NA
cg06941127	-1.44954	-0.582789	-0.173532	-1.27601	-0.409257	-0.866754	0.792228	13.7093	2.1334e-05	0.0449049	0.568587	0.580847	0.658114	0.806923	NA	NA
cg11218876	-1.70428	-0.372715	-0.0977316	-1.60655	-0.274983	-1.33157	0.3504	13.7091	2.13364e-05	0.0449049	0.494584	0.544328	0.568542	0.760507	p4	PHACTR1
cg21185355	-1.09977	-0.765433	-0.443544	-0.656226	-0.321889	-0.334337	-0.668641	13.7061	2.13713e-05	0.0449049	0.31545	0.384164	0.439813	0.523067	NA	NA
cg09337852	-1.8238	-0.654587	-0.288294	-1.53551	-0.366292	-1.16922	-0.115188	13.7037	2.13992e-05	0.0449049	0.400072	0.463911	0.518425	0.673473	p1	CALD1
cg05583417	-1.5217	-0.392172	-0.395025	-1.12667	0.00285301	-1.12953	-0.127512	13.6896	2.15619e-05	0.0450336	0.412131	0.51876	0.489567	0.630515	NA	NA
cg22921027	-1.19602	-0.814302	-0.534198	-0.661823	-0.280104	-0.381719	-0.538726	13.6806	2.16665e-05	0.0450336	0.335104	0.409527	0.448108	0.574031	NA	NA
cg07036364	-2.02741	-0.633353	-0.238617	-1.78879	-0.394735	-1.39406	-0.758314	13.6766	2.17135e-05	0.0450336	0.305797	0.304672	0.405665	0.657651	NA	NA
cg04118741	-1.43916	-0.276606	0.121283	-1.56045	-0.397888	-1.16256	0.236848	13.6731	2.17543e-05	0.0450336	0.487393	0.504075	0.557583	0.710492	NA	NA
cg00795125	-1.03764	-0.668029	0.0795592	-1.1172	-0.747588	-0.36961	0.452011	13.6676	2.18183e-05	0.0450336	0.517094	0.471097	0.625048	0.729715	NA	NA
cg00710042	1.32427	0.469046	0.155604	1.16867	0.313442	0.855226	2.09001	13.6632	2.18699e-05	0.0450336	0.849414	0.792486	0.778507	0.703583	NA	NA
cg19528764	-1.61845	-0.449762	0.148761	-1.76721	-0.598523	-1.16869	0.789431	13.6613	2.18922e-05	0.0450336	0.567833	0.560405	0.645596	0.837036	NA	NA
cg27454283	-1.28528	-0.514527	-0.156756	-1.12852	-0.357771	-0.770749	-0.343182	13.6474	2.20568e-05	0.0450878	0.386832	0.385174	0.468794	0.642822	NA	NA
cg26427896	-1.36247	-0.625411	-0.454653	-0.907821	-0.170758	-0.737062	-0.409412	13.6441	2.2097e-05	0.0450878	0.358364	0.422175	0.464565	0.602291	NA	NA
cg02196044	-1.95512	-0.760609	-0.200933	-1.75418	-0.559676	-1.19451	0.608319	13.6435	2.21038e-05	0.0450878	0.521553	0.514263	0.6508	0.798447	NA	NA
cg11345703	1.24604	0.66118	0.130063	1.11598	0.531118	0.584859	1.92443	13.6182	2.24071e-05	0.0455421	0.83398	0.795032	0.757343	0.684489	NA	NA
cg05117638	0.95803	0.947078	0.344148	0.613881	0.602929	0.0109522	0.663496	13.6098	2.25088e-05	0.0455421	0.697084	0.593843	0.549597	0.492768	NA	NA
cg23270724	-1.33974	-0.540352	0.239251	-1.57899	-0.779602	-0.799385	0.245169	13.6095	2.25136e-05	0.0455421	0.492351	0.471293	0.572095	0.700801	NA	NA
cg11186282	-1.76756	-0.424703	-0.155719	-1.61185	-0.268984	-1.34286	0.109258	13.5943	2.2699e-05	0.0457904	0.443934	0.504818	0.533144	0.737366	NA	NA
cg23176316	-2.15112	-0.225972	-0.0380986	-2.11302	-0.187873	-1.92515	0.461162	13.5885	2.27696e-05	0.0458062	0.518202	0.533148	0.560907	0.834734	NA	NA
cg09520308	-1.3476	-0.0865679	0.510869	-1.85847	-0.597437	-1.26103	0.795751	13.5797	2.28782e-05	0.0458756	0.605135	0.567708	0.63618	0.769366	NA	NA
cg04950204	-1.30325	-0.48541	-0.0371613	-1.26608	-0.448248	-0.817837	-1.03773	13.5756	2.29297e-05	0.0458756	0.285703	0.272232	0.351784	0.516495	NA	NA
cg17918556	-1.43625	-0.336107	0.077556	-1.51381	-0.413663	-1.10015	-0.101772	13.5681	2.3023e-05	0.0459363	0.436678	0.433883	0.493494	0.67143	NA	NA
cg04028140	-1.41043	-0.500314	0.132279	-1.54271	-0.632593	-0.910113	-0.290433	13.5548	2.31893e-05	0.0461421	0.399982	0.360827	0.487184	0.637304	NA	NA
cg19633645	0.895545	0.652118	-0.168426	1.06397	0.820544	0.243427	1.26129	13.5339	2.34523e-05	0.0465385	0.753284	0.742909	0.654019	0.610623	NA	NA
cg14839340	-1.5996	-0.320175	0.2679	-1.8675	-0.588075	-1.27942	-0.958969	13.524	2.35786e-05	0.0466624	0.293371	0.290922	0.359282	0.554073	NA	NA
cg21402832	1.8813	-0.138052	0.327529	1.55378	-0.465581	2.01936	-2.67119	13.5149	2.36955e-05	0.046767	0.165402	0.108878	0.167039	0.0594667	p1	TNFSF10
cg00657389	-1.75466	-0.456144	0.0505174	-1.80518	-0.506661	-1.29852	0.120875	13.5061	2.38084e-05	0.0467996	0.46151	0.429508	0.532486	0.784753	NA	NA
cg18640536	-1.63534	-0.601795	-0.749086	-0.88625	0.147291	-1.03354	1.25052	13.5037	2.38402e-05	0.0467996	0.628443	0.724788	0.71134	0.838092	NA	NA
cg20339019	1.30796	0.41871	-0.07867	1.38663	0.49738	0.88925	2.53744	13.4921	2.39913e-05	0.0469392	0.879785	0.861498	0.832636	0.755202	NA	NA
cg10443287	-1.61188	-0.784857	-0.168133	-1.44374	-0.616724	-0.82702	-0.31604	13.4883	2.40398e-05	0.0469392	0.369132	0.375303	0.497031	0.672559	p20	FAM169A
cg26803289	1.87926	0.145443	0.00209481	1.87717	0.143348	1.73382	1.83503	13.4808	2.41386e-05	0.0470053	0.812471	0.788527	0.785605	0.561483	NA	NA
cg23879118	1.06297	0.304564	-0.235238	1.29821	0.539802	0.75841	1.24298	13.4751	2.42135e-05	0.0470053	0.736273	0.745735	0.68312	0.554391	NA	NA
cg14970802	-1.36247	-0.774598	-0.574823	-0.78765	-0.199775	-0.587874	1.81013	13.471	2.42668e-05	0.0470053	0.710087	0.774688	0.785474	0.891069	NA	NA
cg10804608	-1.08409	-0.535623	0.374316	-1.45841	-0.909939	-0.548467	1.40214	13.4478	2.45752e-05	0.0472927	0.682411	0.600434	0.743462	0.843386	p	NT5E
cg07144560	-1.41752	-0.578556	-0.0873676	-1.33015	-0.491188	-0.838964	-1.09266	13.4461	2.45973e-05	0.0472927	0.265755	0.291462	0.355574	0.47775	NA	NA
cg06482136	1.50467	0.9462	0.457913	1.04676	0.488286	0.558471	2.07888	13.4389	2.46947e-05	0.0472927	0.855505	0.830598	0.763845	0.62393	NA	NA
cg22147960	-1.24155	-0.581182	-0.337981	-0.903569	-0.243202	-0.660367	-1.22957	13.4354	2.4742e-05	0.0472927	0.256331	0.259298	0.331693	0.445505	NA	NA
cg22160463	-1.41405	-0.342629	0.0502596	-1.46431	-0.392889	-1.07142	-0.713263	13.4229	2.49099e-05	0.0472927	0.328622	0.353747	0.416147	0.519668	NA	NA
cg12723163	1.69571	0.605356	0.490075	1.20563	0.115281	1.09035	0.995157	13.4227	2.49136e-05	0.0472927	0.733936	0.675264	0.631291	0.458621	NA	NA
cg04838847	0.625113	0.937039	0.68888	-0.0637665	0.248159	-0.311926	3.65716	13.4169	2.4992e-05	0.0472927	0.946054	0.908124	0.896019	0.920723	NA	NA
cg22432387	-1.44854	-0.499736	-0.0734069	-1.37513	-0.426329	-0.9488	-1.13286	13.4131	2.50438e-05	0.0472927	0.265479	0.285536	0.34374	0.495586	NA	NA
cg16892624	1.48293	0.315361	-0.0530793	1.53601	0.36844	1.16757	0.647771	13.4025	2.51888e-05	0.0472927	0.652698	0.673406	0.594373	0.386538	NA	NA
cg06232721	-1.31877	-0.238967	0.538502	-1.85727	-0.777469	-1.0798	0.517369	13.3979	2.52518e-05	0.0472927	0.541357	0.54369	0.621498	0.610854	NA	NA
cg09224845	-1.14311	-0.671989	-0.19725	-0.945862	-0.474739	-0.471123	-1.37613	13.3968	2.52668e-05	0.0472927	0.236281	0.237329	0.322266	0.405157	NA	NA
cg22608889	1.31254	0.650365	-0.184931	1.49747	0.835296	0.662179	1.19601	13.3961	2.52767e-05	0.0472927	0.74429	0.755448	0.648443	0.524518	NA	NA
cg12210457	-1.09675	-0.689069	-0.388973	-0.70778	-0.300096	-0.407684	0.186379	13.39	2.53609e-05	0.0472927	0.474486	0.467666	0.576805	0.667023	p19	AGAP3
cg01285176	1.42746	0.308598	-0.338656	1.76611	0.647254	1.11886	1.78817	13.3852	2.54281e-05	0.0472927	0.808497	0.797293	0.748966	0.624065	NA	NA
cg24237081	-1.60853	-0.424921	-0.128772	-1.47976	-0.296148	-1.18361	-2.24951	13.3843	2.544e-05	0.0472927	0.141379	0.184745	0.196615	0.301612	p2	SOX5
cg01566121	-1.31644	-0.586313	-0.466427	-0.850017	-0.119885	-0.730132	1.11123	13.3792	2.55109e-05	0.0472927	0.603055	0.699193	0.706364	0.81431	NA	NA
cg25790884	0.525523	0.952997	0.259501	0.266021	0.693496	-0.427475	1.85678	13.3788	2.55161e-05	0.0472927	0.827846	0.801611	0.720533	0.738921	NA	NA
cg17954695	1.50124	0.365465	-0.244827	1.74607	0.610293	1.13578	1.31751	13.367	2.56811e-05	0.0473715	0.744376	0.782316	0.67966	0.537526	NA	NA
cg16879857	-1.35901	-0.463991	-0.136589	-1.22242	-0.327401	-0.89502	-0.219199	13.3634	2.5732e-05	0.0473715	0.404226	0.425082	0.478842	0.669548	p1	MIR217HG
cg11643041	1.48349	-0.409542	-0.683193	2.16669	0.273651	1.89304	0.646829	13.3619	2.57533e-05	0.0473715	0.606039	0.649069	0.603053	0.484952	NA	NA
cg27177514	-1.51564	-0.137594	-0.204419	-1.31122	0.0668245	-1.37804	0.628404	13.3394	2.60718e-05	0.0477102	0.562843	0.590021	0.591743	0.791939	NA	NA
cg18720720	-1.40905	-0.113299	0.0548073	-1.46386	-0.168106	-1.29575	-0.118116	13.3392	2.60744e-05	0.0477102	0.462404	0.418912	0.463581	0.681694	NA	NA
cg19424492	1.09521	0.72878	0.24911	0.846102	0.47967	0.366432	2.10102	13.3351	2.61334e-05	0.0477102	0.85026	0.827192	0.775226	0.70532	NA	NA
cg15574895	-1.30408	-0.581107	-0.309278	-0.994798	-0.271829	-0.722969	-0.156422	13.3296	2.62124e-05	0.0477349	0.404602	0.441864	0.515174	0.628288	NA	NA
cg00816396	-1.55279	-0.514992	0.217987	-1.77078	-0.732978	-1.0378	-0.181692	13.3221	2.63202e-05	0.0477349	0.411067	0.375317	0.495202	0.715029	NA	NA
cg07518989	1.49476	0.311342	-0.152965	1.64772	0.464307	1.18342	1.83005	13.3169	2.63942e-05	0.0477349	0.814861	0.79203	0.762087	0.610981	NA	NA
cg09122558	-1.45143	-0.646145	-0.518578	-0.932853	-0.127567	-0.805286	0.550708	13.3098	2.6497e-05	0.0477349	0.517497	0.569278	0.613878	0.78517	NA	NA
cg14892464	-1.667	-0.0567576	0.0585573	-1.72556	-0.115315	-1.61024	0.367118	13.3037	2.65859e-05	0.0477349	0.528869	0.49453	0.554025	0.760892	NA	NA
cg23998524	-0.88294	-0.86473	-0.481887	-0.401053	-0.382842	-0.0182107	0.153268	13.2986	2.666e-05	0.0477349	0.440863	0.526029	0.5878	0.627021	NA	NA
cg01491794	1.34464	-0.168142	0.841434	0.503204	-1.00958	1.51278	-2.74614	13.2967	2.66876e-05	0.0477349	0.150209	0.105916	0.154398	0.0794274	p1	YWHAQ
cg22479441	-1.00068	-0.731278	-0.504007	-0.496678	-0.227271	-0.269407	-0.0903912	13.292	2.67576e-05	0.0477349	0.405733	0.482163	0.539024	0.594648	NA	NA
cg21122391	-1.23665	-0.868636	-0.4859	-0.75075	-0.382735	-0.368014	-2.01426	13.2902	2.67829e-05	0.0477349	0.152861	0.171592	0.247579	0.309525	NA	NA
cg20898283	-1.32146	-0.542733	-0.304612	-1.01684	-0.238121	-0.778723	0.524545	13.2805	2.69259e-05	0.0477349	0.540866	0.524819	0.603208	0.763393	NA	NA
cg11595624	-1.38509	-0.594794	-0.498503	-0.886587	-0.0962911	-0.790296	-0.449985	13.2789	2.69496e-05	0.0477349	0.358247	0.421329	0.445534	0.607514	NA	NA
cg13084335	-1.51795	-0.450194	-0.0881628	-1.42978	-0.362031	-1.06775	-1.75888	13.2761	2.69915e-05	0.0477349	0.197472	0.186293	0.24484	0.401288	p1,p4	CRYAB,HSPB2
cg03552709	-1.7094	-0.715829	-0.0328501	-1.67655	-0.682979	-0.993574	0.501913	13.2743	2.70176e-05	0.0477349	0.502393	0.489603	0.610709	0.840273	NA	NA
cg14017402	-1.23757	-0.495267	-0.333752	-0.90382	-0.161515	-0.742305	-0.444799	13.2611	2.72146e-05	0.0477349	0.377365	0.390492	0.446301	0.579452	NA	NA
cg24598922	-1.33629	-0.78073	-0.346157	-0.990135	-0.434573	-0.555562	-0.313722	13.2609	2.72177e-05	0.0477349	0.368808	0.413624	0.495903	0.615112	NA	NA
cg00714184	-0.627798	-1.79342	-0.864265	0.236467	-0.929155	1.16562	-1.75146	13.26	2.72313e-05	0.0477349	0.18107	0.202475	0.330324	0.318466	NA	NA
cg04950393	-1.34361	-0.367577	-0.181029	-1.16258	-0.186547	-0.97603	-0.313131	13.2581	2.72582e-05	0.0477349	0.398672	0.430341	0.464206	0.58736	NA	NA
cg16787307	-1.45582	-0.433778	0.303429	-1.75925	-0.737207	-1.02204	0.213267	13.2465	2.74331e-05	0.0479263	0.488644	0.436352	0.557649	0.747794	NA	NA
cg06085432	-1.3159	-0.327171	-0.22259	-1.09331	-0.104581	-0.988725	0.304716	13.2402	2.75281e-05	0.0479776	0.488951	0.536083	0.569113	0.679248	NA	NA
cg24420884	-1.23213	-0.312445	-0.163765	-1.06837	-0.14868	-0.919686	0.39866	13.2302	2.76795e-05	0.0480148	0.517128	0.544299	0.580616	0.708755	NA	NA
cg22014112	0.915401	0.772337	0.363367	0.552033	0.40897	0.143063	1.96087	13.229	2.76974e-05	0.0480148	0.84359	0.785148	0.750426	0.7182	p11	TNFAIP3
cg16799093	-1.31754	-0.447616	0.418072	-1.73561	-0.865688	-0.86992	0.404591	13.2041	2.80803e-05	0.0480148	0.51435	0.477757	0.600545	0.751385	NA	NA
cg22539014	-1.44664	-0.751374	0.259197	-1.70584	-1.01057	-0.695271	1.7774	13.2003	2.81388e-05	0.0480148	0.689185	0.716083	0.801271	0.889146	NA	NA
cg15733367	1.76405	0.296596	0.301513	1.46254	-0.00491687	1.46746	-0.51329	13.2002	2.81393e-05	0.0480148	0.45525	0.443162	0.42033	0.257443	NA	NA
cg06778640	-2.30675	-0.558503	-0.069008	-2.23774	-0.489495	-1.74825	1.77483	13.1948	2.82232e-05	0.0480148	0.694849	0.757203	0.780604	0.905363	NA	NA
cg15878708	-1.67165	-0.624979	-0.137496	-1.53415	-0.487483	-1.04667	0.591566	13.1938	2.82395e-05	0.0480148	0.536151	0.506671	0.625975	0.807888	NA	NA
cg01104230	-0.980281	-0.812956	-0.571146	-0.409134	-0.241809	-0.167325	-0.438192	13.1877	2.83345e-05	0.0480148	0.350804	0.419576	0.48152	0.539507	NA	NA
cg26110900	1.51392	0.357281	0.332272	1.18165	0.0250095	1.15664	2.00033	13.1814	2.8432e-05	0.0480148	0.842089	0.741999	0.787306	0.655379	NA	NA
cg08751348	1.42793	0.395004	0.338012	1.08992	0.0569921	1.03293	-0.512261	13.1774	2.84961e-05	0.0480148	0.48361	0.383862	0.399335	0.273158	NA	NA
cg20044641	-1.18087	-0.380833	0.330683	-1.51155	-0.711516	-0.800032	-0.581755	13.172	2.85805e-05	0.0480148	0.381969	0.267423	0.434632	0.57285	NA	NA
cg14543169	1.26996	0.194605	-0.290177	1.56013	0.484782	1.07535	0.122817	13.1714	2.85891e-05	0.0480148	0.548914	0.620058	0.512197	0.317037	NA	NA
cg02980235	1.45793	-0.0907876	-0.563016	2.02094	0.472228	1.54871	1.58012	13.1669	2.86606e-05	0.0480148	0.74633	0.818932	0.755559	0.58014	NA	NA
cg18151713	0.44253	0.808022	1.26654	-0.824007	-0.458515	-0.365492	3.46892	13.1638	2.87094e-05	0.0480148	0.937016	0.867455	0.904292	0.914429	NA	NA
cg01185766	-1.36869	-0.343651	-0.409061	-0.959625	0.0654102	-1.02503	-1.34266	13.1621	2.87365e-05	0.0480148	0.247024	0.269627	0.298862	0.424552	NA	NA
cg23016734	-0.832819	-1.03421	-1.57409	0.741274	0.539883	0.201391	-1.17671	13.1617	2.87434e-05	0.0480148	0.2224	0.446984	0.367559	0.344474	p20	ROBO2
cg07351688	-1.14882	-0.705154	-0.324194	-0.824626	-0.380961	-0.443665	-0.0394306	13.1606	2.87602e-05	0.0480148	0.430032	0.41473	0.540369	0.667207	NA	NA
cg17344321	-1.55544	-0.915162	-0.564983	-0.990453	-0.35018	-0.640273	-1.37049	13.1596	2.8776e-05	0.0480148	0.216005	0.24746	0.325132	0.479367	NA	NA
cg27596556	-1.36695	-0.287925	0.212987	-1.57994	-0.500912	-1.07903	0.317745	13.1582	2.87988e-05	0.0480148	0.510689	0.497264	0.567556	0.724407	NA	NA
cg11712484	-1.36383	-0.528891	-0.091513	-1.27232	-0.437378	-0.834938	-0.683815	13.1516	2.89029e-05	0.0480788	0.329584	0.331444	0.414244	0.577231	NA	NA
cg16393928	-1.80183	-0.443111	-0.101923	-1.69991	-0.341188	-1.35872	0.126328	13.1445	2.90166e-05	0.0481581	0.451494	0.470509	0.5394	0.765247	NA	NA
cg14141895	-1.30611	-0.479703	-0.0929261	-1.21319	-0.386777	-0.826411	1.28069	13.1271	2.92962e-05	0.048512	0.646855	0.695984	0.709039	0.860516	NA	NA
cg13362792	-1.19541	-0.449868	-0.0263887	-1.16902	-0.423479	-0.74554	-1.07784	13.11	2.95755e-05	0.0488247	0.286338	0.333396	0.336386	0.46715	NA	NA
cg02659586	-1.27275	-0.772064	-0.196325	-1.07643	-0.575738	-0.500688	1.35383	13.0953	2.98167e-05	0.0488247	0.651948	0.671357	0.741844	0.854152	NA	NA
cg24983185	0.455958	0.961306	0.435537	0.0204211	0.52577	-0.505348	3.34283	13.0931	2.98525e-05	0.0488247	0.930704	0.913	0.878393	0.902434	NA	NA
cg24586899	-2.13151	0.221947	0.344377	-2.47589	-0.12243	-2.35345	-1.6379	13.0898	2.99065e-05	0.0488247	0.279199	0.173704	0.238435	0.466116	NA	NA
cg11268227	-1.60316	-0.513622	-0.0256502	-1.57751	-0.487971	-1.08953	0.416495	13.0869	2.9954e-05	0.0488247	0.499248	0.518352	0.606063	0.756706	NA	NA
cg25881535	-1.17493	-0.718135	-0.457478	-0.717454	-0.260657	-0.456797	0.407891	13.0816	3.0043e-05	0.0488247	0.497918	0.525376	0.617987	0.706248	NA	NA
cg02700359	1.08149	0.564928	-0.481066	1.56256	1.04599	0.516567	1.28472	13.0814	3.00456e-05	0.0488247	0.765474	0.702265	0.639707	0.619807	NA	NA
cg24105728	1.07307	0.548205	0.0336083	1.03946	0.514597	0.524862	1.57427	13.0757	3.01409e-05	0.0488247	0.79077	0.774342	0.714285	0.623506	NA	NA
cg11738486	-1.40768	-0.907195	-0.44223	-0.965452	-0.464965	-0.500487	1.07168	13.0735	3.01784e-05	0.0488247	0.598648	0.642033	0.719105	0.806168	NA	NA
cg06996586	1.44144	-0.0199679	-0.0844815	1.52592	0.0645135	1.46141	2.64427	13.0658	3.03059e-05	0.0488247	0.871423	0.8753	0.871812	0.723205	NA	NA
cg25138553	-1.76817	-0.474214	-0.545368	-1.22281	0.0711541	-1.29396	-0.403309	13.065	3.03205e-05	0.0488247	0.374133	0.427009	0.430946	0.681215	NA	NA
cg14625113	-1.54206	-0.803729	-0.395696	-1.14636	-0.408033	-0.73833	-1.57036	13.0607	3.03921e-05	0.0488247	0.198019	0.266589	0.306364	0.37878	NA	NA
cg08912229	-1.42787	-0.599032	0.0916315	-1.51951	-0.690663	-0.828843	1.10043	13.0566	3.04609e-05	0.0488247	0.622197	0.615401	0.711277	0.827403	NA	NA
cg23583457	-1.6577	-0.0554303	0.441713	-2.09942	-0.497143	-1.60227	1.65221	13.0552	3.04857e-05	0.0488247	0.714118	0.727279	0.767822	0.834721	NA	NA
cg04679620	-1.34395	-0.684495	-0.535045	-0.808907	-0.14945	-0.659457	0.152185	13.0512	3.0553e-05	0.0488247	0.441533	0.53832	0.559023	0.692829	NA	NA
cg18945877	1.37575	0.193075	-0.0798818	1.45563	0.272957	1.18267	1.15146	13.0511	3.05549e-05	0.0488247	0.710479	0.745275	0.691217	0.492186	NA	NA
cg05520003	1.23176	0.0457615	-0.785294	2.01705	0.831055	1.186	2.1914	13.0421	3.07061e-05	0.0489593	0.828697	0.852583	0.804855	0.727943	NA	NA
cg06652686	-1.15516	-0.442396	0.0280594	-1.18322	-0.470455	-0.712762	-1.7959	13.0339	3.08465e-05	0.049076	0.189738	0.19346	0.246754	0.353432	NA	NA
cg02498682	-1.29055	-0.424145	0.0701861	-1.36073	-0.494331	-0.866402	0.761761	13.025	3.09995e-05	0.0491155	0.583876	0.529371	0.643057	0.81104	NA	NA
cg19918599	-1.20072	-0.455866	0.0407979	-1.24152	-0.496663	-0.744858	0.833482	13.0236	3.10227e-05	0.0491155	0.584822	0.595351	0.656502	0.792921	NA	NA
cg26638887	-1.37079	-0.555753	0.0900897	-1.46088	-0.645843	-0.815038	-0.947651	13.0142	3.11865e-05	0.0491155	0.295422	0.283888	0.382563	0.516089	NA	NA
cg03804958	-1.55711	-0.171108	0.809235	-2.36634	-0.980343	-1.386	0.544106	13.0132	3.12033e-05	0.0491155	0.546625	0.506613	0.613323	0.752388	NA	NA
cg20794313	1.22187	0.709943	0.541356	0.680517	0.168587	0.51193	2.52644	13.0129	3.12076e-05	0.0491155	0.884793	0.846513	0.826214	0.77888	p1	ENST00000457668
cg01784030	-1.92412	-0.366673	-0.277331	-1.64678	-0.0893416	-1.55744	1.28819	13.0083	3.12877e-05	0.0491356	0.643341	0.703584	0.712351	0.831826	NA	NA
cg16450086	-1.49386	-0.505355	0.123165	-1.61702	-0.628521	-0.988503	-0.178523	13.0021	3.13951e-05	0.0491985	0.414403	0.379043	0.500427	0.692091	NA	NA
cg13860281	1.9836	0.556337	0.336768	1.64683	0.219569	1.42727	0.894436	12.9934	3.15476e-05	0.0492711	0.725824	0.620637	0.618815	0.413195	NA	NA
cg16377866	-1.22251	-0.704721	-0.0209192	-1.20159	-0.683802	-0.517793	1.58796	12.9918	3.15764e-05	0.0492711	0.694237	0.694119	0.770115	0.864882	NA	NA
cg15522844	-1.39326	-0.47539	-0.232456	-1.16081	-0.242934	-0.917872	-1.62386	12.9857	3.16838e-05	0.0493332	0.214427	0.226617	0.255702	0.412923	NA	NA
cg04588423	-1.42445	-0.440648	-0.228833	-1.19561	-0.211815	-0.983799	0.608985	12.9744	3.18821e-05	0.0494511	0.543659	0.554212	0.617465	0.793331	NA	NA
cg15213272	-1.41096	-0.547223	0.0169094	-1.42787	-0.564132	-0.863738	0.633954	12.9737	3.18949e-05	0.0494511	0.548607	0.546862	0.62637	0.758118	NA	NA
cg20970886	1.20284	0.791839	0.846838	0.355998	-0.0549994	0.410998	1.26923	12.9468	3.23755e-05	0.0497247	0.779114	0.638011	0.657134	0.613132	NA	NA
cg13671732	-1.82215	-0.426043	-0.0425395	-1.77961	-0.383504	-1.39611	-0.402228	12.9433	3.24398e-05	0.0497247	0.386941	0.345004	0.431431	0.725313	NA	NA
cg11613741	-1.74348	-0.555828	-0.308916	-1.43456	-0.246912	-1.18765	-0.106958	12.9415	3.24713e-05	0.0497247	0.419358	0.427135	0.504647	0.694437	p1	KIAA0408
cg10489936	0.890831	0.978002	1.08608	-0.195245	-0.108074	-0.0871709	-1.99988	12.9409	3.24824e-05	0.0497247	0.261161	0.214016	0.175132	0.170487	NA	NA
cg17174275	1.17943	0.794299	0.639284	0.540146	0.155015	0.385131	1.98406	12.94	3.24993e-05	0.0497247	0.845826	0.796432	0.758005	0.696785	NA	NA
cg17659389	-1.04506	-0.484022	0.336645	-1.38171	-0.820667	-0.561042	0.381473	12.938	3.25357e-05	0.0497247	0.519129	0.464524	0.5987	0.73269	NA	NA
cg01912331	1.41169	0.271792	0.254481	1.15721	0.017311	1.1399	-0.313448	12.9372	3.25499e-05	0.0497247	0.51393	0.447678	0.45164	0.246226	NA	NA
cg12081317	-1.57671	-0.30878	-0.321974	-1.25474	0.0131935	-1.26793	0.432338	12.9335	3.26161e-05	0.0497247	0.509619	0.563579	0.583025	0.756316	NA	NA
cg12710800	-1.85885	0.4017	-0.292235	-1.56661	0.693935	-2.26055	-2.97082	12.9298	3.26843e-05	0.0497249	0.12531	0.131165	0.0850346	0.280981	NA	NA
cg09147068	-1.51253	-0.45901	-0.295474	-1.21706	-0.163537	-1.05352	-0.499608	12.9243	3.27846e-05	0.0497738	0.350091	0.422481	0.438283	0.587436	NA	NA
cg23380502	-1.74121	-0.744142	-0.243878	-1.49733	-0.500264	-0.997071	0.279543	12.9075	3.30932e-05	0.050138	0.473062	0.487669	0.591698	0.7234	p4	PPFIBP2
cg01411101	-1.44798	-0.470119	-1.3449	-0.103078	0.874782	-0.977859	1.24195	12.8927	3.33676e-05	0.050391	0.613638	0.822748	0.682868	0.81049	NA	NA
cg14634900	1.21019	0.812709	0.386387	0.823798	0.426321	0.397477	2.41133	12.8826	3.35554e-05	0.050391	0.871013	0.844098	0.803943	0.781292	NA	NA
cg13306032	1.57821	-0.00647596	0.051164	1.52704	-0.05764	1.58468	1.12846	12.8809	3.35881e-05	0.050391	0.72666	0.658496	0.699098	0.459992	NA	NA
cg05636603	-1.71997	-0.446038	-0.260812	-1.45916	-0.185226	-1.27394	0.852908	12.8772	3.36564e-05	0.050391	0.584249	0.588992	0.656716	0.820324	NA	NA
cg05955332	-1.089	-0.708932	-0.291511	-0.797484	-0.417421	-0.380063	0.106036	12.8767	3.36672e-05	0.050391	0.447314	0.493131	0.574595	0.621705	NA	NA
cg09137328	-2.99566	-0.991131	-1.23036	-1.7653	0.239234	-2.00453	-2.35364	12.8763	3.36742e-05	0.050391	0.105402	0.22881	0.197902	0.477323	p1	GPR158
cg10453419	1.31112	0.443286	-0.0184971	1.32961	0.461783	0.867831	0.386444	12.8723	3.37492e-05	0.0503958	0.620372	0.607999	0.544005	0.371647	NA	NA
cg18390596	1.06749	0.740505	0.128256	0.939232	0.612249	0.326983	0.972996	12.8688	3.38154e-05	0.0503958	0.716197	0.689259	0.623354	0.495252	p	TNFSF8
cg21852439	-2.37515	-0.139862	0.0708506	-2.446	-0.210713	-2.23529	-2.22768	12.8448	3.42711e-05	0.0509709	0.148841	0.204182	0.200818	0.418703	p	GRID2
cg13946538	-1.25087	0.267489	-0.482354	-0.768521	0.749843	-1.51836	-0.948101	12.8356	3.4448e-05	0.0510284	0.323021	0.436177	0.282791	0.539018	NA	NA
cg14584292	1.14259	0.911746	0.897347	0.245241	0.0143984	0.230842	0.431074	12.8356	3.44495e-05	0.0510284	0.663831	0.512498	0.531076	0.424805	NA	NA
cg03525643	-1.20392	-0.422114	-0.0818899	-1.12203	-0.340224	-0.781808	-0.589376	12.8264	3.46263e-05	0.0511089	0.350279	0.371059	0.421693	0.566563	NA	NA
cg09111223	-1.37187	-0.349367	0.103575	-1.47545	-0.452942	-1.02251	-2.04938	12.8255	3.46439e-05	0.0511089	0.168982	0.195899	0.204328	0.361129	p1	GRID2
cg07608537	-1.23397	-0.505322	0.0100548	-1.24403	-0.515377	-0.728649	0.0299823	12.8179	3.47917e-05	0.0511546	0.456999	0.427506	0.537008	0.673716	NA	NA
cg13929970	-1.35145	-0.652739	-0.211603	-1.13985	-0.441136	-0.698714	0.53412	12.8167	3.48149e-05	0.0511546	0.524048	0.524846	0.63397	0.748199	p1	FGFBP1
cg06199070	-1.40722	-0.603013	-0.368523	-1.0387	-0.234489	-0.804207	-1.03713	12.8085	3.49757e-05	0.0512876	0.275465	0.316824	0.346125	0.537423	NA	NA
cg10470429	-1.21634	-0.760821	-0.532408	-0.68393	-0.228412	-0.455518	-0.3851	12.7979	3.51829e-05	0.0514881	0.359386	0.41258	0.481874	0.589521	NA	NA
cg21094022	-1.16792	-0.518397	-0.239698	-0.92822	-0.278699	-0.649521	-0.190261	12.7823	3.54933e-05	0.0515331	0.410213	0.432711	0.496299	0.626814	p2	LOC400931
cg17619704	1.35344	0.503802	0.12953	1.22392	0.374272	0.849643	2.83954	12.7802	3.55353e-05	0.0515331	0.896702	0.88246	0.862986	0.763255	NA	NA
cg06522768	-1.36439	0.199105	0.204387	-1.56878	-0.00528211	-1.5635	-2.61208	12.7793	3.55523e-05	0.0515331	0.160086	0.129808	0.117396	0.322555	p	FAM82A1
cg03124794	1.71973	0.0838829	0.111018	1.60872	-0.0271355	1.63585	1.99908	12.7755	3.5628e-05	0.0515331	0.816899	0.81744	0.807358	0.602793	NA	NA
cg17130131	2.01313	0.404326	0.0975202	1.91561	0.306806	1.6088	-0.333254	12.7734	3.56706e-05	0.0515331	0.512473	0.447616	0.43631	0.246032	p	NFIX
cg01894038	-1.16955	-0.696668	0.00229142	-1.17184	-0.69896	-0.472883	-1.50865	12.7686	3.57671e-05	0.0515331	0.212434	0.212575	0.311661	0.382497	NA	NA
cg08859278	1.01322	0.552106	0.830361	0.182862	-0.278254	0.461116	1.42726	12.7677	3.57854e-05	0.0515331	0.782324	0.665699	0.710961	0.611361	p7	ZAP70
cg00201393	-1.53075	-0.604205	-0.384765	-1.14598	-0.21944	-0.92654	-0.101726	12.7581	3.59783e-05	0.0515331	0.418367	0.439735	0.51838	0.653739	NA	NA
cg22959827	-1.11293	-0.667092	-0.315822	-0.797112	-0.35127	-0.445842	-0.704531	12.7535	3.60714e-05	0.0515331	0.326718	0.319731	0.42941	0.540667	NA	NA
cg23548616	1.28344	-0.121904	-0.123745	1.40719	0.00184139	1.40534	0.814194	12.7484	3.61754e-05	0.0515331	0.655935	0.640839	0.648779	0.491679	NA	NA
cg08621540	-1.241	-0.460719	-0.141134	-1.09986	-0.319584	-0.780279	-0.24044	12.7434	3.62761e-05	0.0515331	0.410256	0.422192	0.471424	0.649748	NA	NA
cg16799737	-1.07814	-0.749441	-0.392863	-0.685273	-0.356578	-0.328696	-0.976845	12.7391	3.63641e-05	0.0515331	0.283007	0.304617	0.384522	0.468082	NA	NA
cg11612098	1.72733	0.155722	0.398223	1.32911	-0.242501	1.57161	2.51268	12.735	3.64479e-05	0.0515331	0.875121	0.838539	0.853119	0.697384	NA	NA
cg15940703	1.24811	0.344013	-0.337916	1.58603	0.681929	0.904098	1.36034	12.7341	3.64654e-05	0.0515331	0.747532	0.777853	0.699866	0.55505	NA	NA
cg26889362	-1.64364	-0.238788	0.454515	-2.09815	-0.693304	-1.40485	1.48815	12.7333	3.64823e-05	0.0515331	0.710056	0.602754	0.733928	0.840339	NA	NA
cg22928020	2.077	0.57288	0.365478	1.71152	0.207402	1.50412	1.6747	12.7306	3.65376e-05	0.0515331	0.828693	0.707494	0.730727	0.534636	p	KCNJ15
cg21151335	-2.16501	-0.00454551	0.0519674	-2.21698	-0.0565129	-2.16046	-2.53427	12.7261	3.66297e-05	0.0515331	0.130625	0.158719	0.134284	0.366317	NA	NA
cg21647035	-1.3819	-1.02616	-0.59925	-0.782654	-0.426908	-0.355746	0.436395	12.723	3.6695e-05	0.0515331	0.462529	0.599167	0.630736	0.723069	NA	NA
cg02253535	-1.35809	-0.742091	-0.234134	-1.12396	-0.507957	-0.616001	-0.375144	12.7216	3.67234e-05	0.0515331	0.367193	0.383807	0.485331	0.60579	NA	NA
cg03768777	-1.80553	-0.0904798	-0.0266657	-1.77886	-0.0638141	-1.71505	-3.56117	12.7195	3.67661e-05	0.0515331	0.0715791	0.0633831	0.073206	0.208699	p1	VASH2
cg02991306	-0.55657	-0.803323	-0.18948	-0.367089	-0.613843	0.246753	0.957293	12.7184	3.67903e-05	0.0515331	0.589005	0.59951	0.699622	0.772199	NA	NA
cg05685272	1.72627	0.491501	0.0467512	1.67952	0.44475	1.23477	1.39934	12.7153	3.68545e-05	0.0515331	0.777894	0.73614	0.698967	0.520207	NA	NA
cg04192482	-1.41858	-0.293787	0.00557562	-1.42415	-0.299362	-1.12479	0.508411	12.7051	3.70656e-05	0.0515331	0.548614	0.509902	0.590054	0.781069	NA	NA
cg20546935	-1.64536	-0.560964	-0.232624	-1.41274	-0.328339	-1.0844	-0.134063	12.7028	3.71133e-05	0.0515331	0.40675	0.432989	0.513165	0.66877	p3	TPCN1
cg15163159	1.77958	0.488397	0.408617	1.37096	0.0797808	1.29118	0.897838	12.6949	3.72792e-05	0.0515331	0.69896	0.702883	0.62927	0.39179	NA	NA
cg23963252	-1.77837	-0.383979	-0.216391	-1.56198	-0.167588	-1.39439	0.207451	12.692	3.73412e-05	0.0515331	0.478824	0.494546	0.543436	0.747162	NA	NA
cg06205391	-1.10604	-0.687443	-0.348843	-0.757197	-0.3386	-0.418597	-0.867769	12.6904	3.73746e-05	0.0515331	0.298827	0.320817	0.391236	0.510529	p	SPTBN1
cg16501428	-1.13989	-0.541252	-0.0968789	-1.04301	-0.444374	-0.598636	-0.205053	12.6867	3.74522e-05	0.0515331	0.410176	0.401899	0.501149	0.644872	NA	NA
cg20657057	-1.76597	-0.0667828	0.133754	-1.89972	-0.200537	-1.69918	0.92286	12.6827	3.75366e-05	0.0515331	0.633832	0.549457	0.640779	0.832227	NA	NA
cg07388580	1.28685	0.299794	-0.478083	1.76493	0.777878	0.987056	0.354916	12.6817	3.75576e-05	0.0515331	0.59498	0.662517	0.537521	0.362401	NA	NA
cg15164173	-1.66727	-0.385972	-0.541101	-1.12617	0.155129	-1.28129	-0.303529	12.6756	3.76861e-05	0.0515331	0.394931	0.452411	0.453973	0.636246	p2	BTBD10
cg09618400	-0.968545	-0.67154	-0.459235	-0.50931	-0.212305	-0.297004	-2.10546	12.6754	3.76919e-05	0.0515331	0.149897	0.186132	0.224399	0.262695	NA	NA
cg12008581	-1.23191	-0.952059	-0.16478	-1.06713	-0.787279	-0.279855	0.774593	12.6754	3.76923e-05	0.0515331	0.546226	0.555839	0.694096	0.758793	NA	NA
cg03606954	-1.37699	-0.479299	-0.00477667	-1.37221	-0.474523	-0.897692	-0.516931	12.6741	3.77181e-05	0.0515331	0.359193	0.371715	0.441217	0.58765	NA	NA
cg17468459	-1.6445	-0.410865	0.026028	-1.67053	-0.436893	-1.23363	-0.0270252	12.6722	3.77601e-05	0.0515331	0.447334	0.414072	0.528601	0.663432	NA	NA
cg03577139	-1.17136	-0.82344	-0.856337	-0.315027	0.0328972	-0.347924	-0.0426628	12.672	3.77633e-05	0.0515331	0.410101	0.501051	0.544294	0.613354	p1	SOD3
cg14905320	1.16637	0.601319	0.324448	0.841923	0.27687	0.565052	2.41816	12.6675	3.78599e-05	0.0515331	0.87315	0.845735	0.819338	0.760286	NA	NA
cg20928429	-1.3787	-0.63135	-0.226155	-1.15255	-0.405195	-0.747352	0.948872	12.6625	3.7966e-05	0.0515331	0.584251	0.608535	0.684048	0.822382	p3	CLDN16
cg12712122	1.77079	0.740718	0.0810277	1.68976	0.65969	1.03007	1.18838	12.6601	3.8018e-05	0.0515331	0.751167	0.729168	0.661412	0.470968	NA	NA
cg07497120	-1.65144	-0.478871	-0.520509	-1.13093	0.0416379	-1.17257	-1.26013	12.6572	3.80805e-05	0.0515331	0.238078	0.295124	0.311817	0.512484	NA	NA
cg26198959	1.41401	0.719513	0.272391	1.14162	0.447122	0.694501	0.656235	12.656	3.8107e-05	0.0515331	0.69036	0.621224	0.567689	0.422087	NA	NA
cg21129401	-1.21571	-0.741785	-0.109591	-1.10612	-0.632194	-0.473922	0.191874	12.6431	3.83853e-05	0.0515399	0.455375	0.47598	0.585385	0.694169	NA	NA
cg12538674	-1.53454	-0.50773	-0.398462	-1.13608	-0.109267	-1.02681	0.296443	12.6425	3.83965e-05	0.0515399	0.4604	0.621298	0.564923	0.705419	NA	NA
cg19732421	-0.589529	1.04497	0.513939	-1.10347	0.531028	-1.6345	-4.11312	12.6398	3.84557e-05	0.0515399	0.0662413	0.0692239	0.0425817	0.0885696	p1	NDE1
cg09119005	0.488923	-0.219344	1.25742	-0.768494	-1.47676	0.708267	-4.45437	12.6398	3.84565e-05	0.0515399	0.0484197	0.0282671	0.0564721	0.0365524	p1	ZFP62
cg18701048	-2.33069	-0.690548	-0.171677	-2.15902	-0.518872	-1.64014	-3.39672	12.6363	3.85322e-05	0.0515399	0.0687832	0.0777896	0.125795	0.218265	p1	DNAH14
cg18884865	1.09164	0.46603	-0.0555757	1.14722	0.521606	0.625609	0.255561	12.6361	3.85355e-05	0.0515399	0.597333	0.571805	0.511136	0.406319	NA	NA
cg24576358	-0.978152	-0.799721	-0.0920009	-0.886151	-0.70772	-0.178431	-0.21894	12.6322	3.8621e-05	0.0515599	0.401	0.381221	0.519366	0.614705	NA	NA
cg02837536	-2.0772	-0.442834	-0.235746	-1.84146	-0.207088	-1.63437	0.342379	12.6109	3.90887e-05	0.0520454	0.467816	0.587789	0.588013	0.715536	NA	NA
cg19066171	-1.10593	-0.58913	-0.385556	-0.720372	-0.203575	-0.516797	-0.235668	12.6092	3.91272e-05	0.0520454	0.399284	0.435274	0.490557	0.619262	NA	NA
cg03272633	1.22434	0.723534	0.31941	0.904931	0.404124	0.500807	2.66072	12.5952	3.94377e-05	0.0522549	0.896443	0.857308	0.828038	0.804746	NA	NA
cg05517880	1.61076	0.683412	-0.0564996	1.66726	0.739912	0.927349	0.734125	12.5949	3.94444e-05	0.0522549	0.686323	0.692697	0.566282	0.437967	NA	NA
cg15665949	1.13171	0.687995	0.501754	0.629954	0.186241	0.443714	2.83749	12.5924	3.94994e-05	0.0522549	0.905442	0.86627	0.850991	0.827887	p17	CORO1A
cg00957952	1.45296	-0.00969546	-0.310817	1.76378	0.301121	1.46265	2.16323	12.5828	3.97153e-05	0.0523105	0.826672	0.853976	0.824771	0.648455	NA	NA
cg11954763	1.46064	0.55993	0.119415	1.34122	0.440515	0.900705	0.227397	12.5813	3.97487e-05	0.0523105	0.621244	0.533346	0.494234	0.375031	NA	NA
cg24691891	-1.45221	-0.142618	-0.0112015	-1.44101	-0.131416	-1.30959	-0.0854424	12.581	3.97563e-05	0.0523105	0.446084	0.437729	0.480789	0.700456	NA	NA
cg12273849	-1.91623	-0.724912	0.0442913	-1.96052	-0.769204	-1.19132	0.805907	12.5737	3.99208e-05	0.0523362	0.549808	0.555571	0.668298	0.833444	NA	NA
cg12052999	-1.64799	-0.32231	-0.230584	-1.4174	-0.0917265	-1.32568	0.400163	12.5609	4.02103e-05	0.0523362	0.501267	0.54932	0.574105	0.777658	p	MICAL3
cg03173502	-2.07148	-0.434776	0.323092	-2.39457	-0.757868	-1.6367	0.793902	12.5599	4.0235e-05	0.0523362	0.576253	0.527355	0.646437	0.805595	NA	NA
cg00814721	-1.33224	-0.401734	-0.0300766	-1.30217	-0.371658	-0.930509	-0.265986	12.5581	4.02742e-05	0.0523362	0.40806	0.38785	0.488303	0.609058	NA	NA
cg09712182	-1.27976	-0.471025	-0.259886	-1.01988	-0.211139	-0.808737	-0.515719	12.5565	4.03121e-05	0.0523362	0.362228	0.370993	0.426772	0.617368	NA	NA
cg02291875	-1.7352	-0.596142	-0.275883	-1.45932	-0.320259	-1.13906	0.053398	12.5542	4.03631e-05	0.0523362	0.424047	0.485337	0.538328	0.737654	NA	NA
cg08755703	1.27811	0.214457	-0.646361	1.92447	0.860819	1.06366	0.659181	12.5527	4.03987e-05	0.0523362	0.65307	0.658478	0.581576	0.457248	NA	NA
cg25305879	-1.57704	-0.474002	-0.331373	-1.24567	-0.142629	-1.10304	0.513797	12.5496	4.04686e-05	0.0523362	0.521975	0.596156	0.594795	0.743674	NA	NA
cg10131001	-1.8747	-0.356999	-0.0462537	-1.82845	-0.310746	-1.5177	0.973223	12.5462	4.0548e-05	0.0523362	0.596704	0.633965	0.666254	0.819021	NA	NA
cg13809937	-1.19377	-0.643572	-0.238461	-0.955308	-0.405111	-0.550197	0.058587	12.5373	4.07528e-05	0.0523362	0.455896	0.440052	0.54164	0.690939	NA	NA
cg21056002	1.29495	0.618911	0.395835	0.899116	0.223075	0.676041	1.19482	12.5325	4.08638e-05	0.0523362	0.750261	0.692539	0.665251	0.544049	NA	NA
cg20630926	-1.6456	-0.440324	0.301613	-1.94721	-0.741937	-1.20527	0.313611	12.5298	4.09267e-05	0.0523362	0.498823	0.448112	0.583982	0.742096	NA	NA
cg10833620	-0.585722	1.05101	0.829753	-1.41548	0.221259	-1.63673	-2.59166	12.5281	4.09654e-05	0.0523362	0.185051	0.127535	0.110542	0.202225	p1	UBA2
cg08423714	1.31253	0.65835	0.585574	0.726958	0.0727765	0.654181	0.909457	12.5271	4.09898e-05	0.0523362	0.717312	0.660764	0.613656	0.482779	p	ANKRD11
cg15766722	-1.33491	-0.626854	-0.206176	-1.12874	-0.420678	-0.708059	-0.326068	12.5251	4.10359e-05	0.0523362	0.383681	0.392187	0.472234	0.656764	NA	NA
cg26753208	-1.54828	-0.18794	-0.687073	-0.861202	0.499133	-1.36034	0.50796	12.5194	4.11681e-05	0.0523362	0.539794	0.603835	0.563972	0.750838	NA	NA
cg18343510	-1.51553	-0.33068	-0.363934	-1.15159	0.0332546	-1.18485	1.8437	12.5188	4.11836e-05	0.0523362	0.74121	0.772833	0.780823	0.883619	NA	NA
cg14178003	-1.07408	-0.767221	-0.30886	-0.765219	-0.458361	-0.306858	-0.295638	12.516	4.12476e-05	0.0523362	0.376335	0.410908	0.508644	0.580797	NA	NA
cg09619282	1.33482	0.403881	0.0462953	1.28852	0.357586	0.930937	0.638804	12.4942	4.17615e-05	0.0523362	0.655505	0.622972	0.59953	0.417176	NA	NA
cg27359501	-0.549494	-1.322	-1.0913	0.541802	-0.230701	0.772503	-2.76406	12.493	4.17911e-05	0.0523362	0.0979484	0.15449	0.180605	0.151603	p1	RTTN
cg10029459	1.3803	0.522609	0.0199388	1.36037	0.50267	0.857696	0.708868	12.4922	4.18095e-05	0.0523362	0.669888	0.664076	0.590235	0.451354	NA	NA
cg06518235	-0.969343	-0.687203	-0.562348	-0.406995	-0.124856	-0.282139	-1.64882	12.4899	4.18644e-05	0.0523362	0.195792	0.25676	0.278429	0.320982	NA	NA
cg08474614	1.37831	0.143608	-0.134088	1.5124	0.277696	1.2347	-1.94176	12.4887	4.18929e-05	0.0523362	0.243439	0.227578	0.194794	0.1385	NA	NA
cg21295171	-1.24643	0.222976	0.915383	-2.16181	-0.692407	-1.4694	1.255	12.4814	4.20669e-05	0.0523362	0.693259	0.621393	0.690233	0.761534	NA	NA
cg25949445	-1.71866	-0.526595	-0.476838	-1.24183	-0.049757	-1.19207	-0.440864	12.4808	4.20811e-05	0.0523362	0.352953	0.411836	0.435442	0.701902	NA	NA
cg10411850	-1.37095	-0.528377	0.0405624	-1.41151	-0.568939	-0.842574	-0.701445	12.4804	4.2091e-05	0.0523362	0.327632	0.322029	0.408113	0.603079	NA	NA
cg19614227	1.13401	0.655392	-0.089251	1.22326	0.744643	0.478621	2.57457	12.4803	4.20929e-05	0.0523362	0.887962	0.878859	0.815579	0.772238	NA	NA
cg07966558	-1.63787	-0.70599	-0.034515	-1.60335	-0.671475	-0.931878	0.018701	12.4781	4.21463e-05	0.0523362	0.437578	0.399223	0.559389	0.678173	NA	NA
cg10669146	-1.22727	-0.736119	-0.287694	-0.939571	-0.448425	-0.491147	0.124733	12.4742	4.22416e-05	0.0523362	0.443456	0.478023	0.566467	0.70072	NA	NA
cg03796943	-1.47009	-0.279096	0.0092971	-1.47938	-0.288393	-1.19099	0.239218	12.474	4.22452e-05	0.0523362	0.49816	0.474171	0.552206	0.731105	NA	NA
cg23815765	-1.49805	-0.372863	-0.469245	-1.0288	0.0963821	-1.12519	-0.389869	12.4729	4.22725e-05	0.0523362	0.385094	0.40629	0.435781	0.653705	NA	NA
cg12459932	1.29287	0.539677	-0.0360068	1.32888	0.575684	0.753197	2.62978	12.4704	4.23317e-05	0.0523362	0.886813	0.879637	0.831623	0.771213	NA	NA
cg02330816	1.29676	-0.338022	-0.322263	1.61902	-0.0157591	1.63478	-1.53353	12.467	4.24147e-05	0.0523362	0.268707	0.275957	0.290912	0.150259	NA	NA
cg10552836	0.807987	0.746051	1.21733	-0.409339	-0.471275	0.0619357	2.09696	12.4665	4.24264e-05	0.0523362	0.862084	0.701294	0.76653	0.794106	p	C1orf186
cg00781208	-1.77525	-0.391905	-0.535044	-1.24021	0.143139	-1.38335	-0.428403	12.4646	4.24725e-05	0.0523362	0.370492	0.415764	0.423767	0.674004	NA	NA
cg08090407	-1.79992	-0.61045	-0.0636349	-1.73628	-0.546815	-1.18947	-1.10802	12.4645	4.24734e-05	0.0523362	0.271393	0.252562	0.351409	0.523802	NA	NA
cg11190798	1.66234	0.650382	0.185996	1.47635	0.464386	1.01196	2.11933	12.4631	4.25093e-05	0.0523362	0.858091	0.811201	0.780087	0.624563	NA	NA
cg13679778	-1.75394	-0.268777	-0.205766	-1.54818	-0.0630114	-1.48517	0.091867	12.4613	4.25507e-05	0.0523362	0.466778	0.482252	0.515263	0.722284	NA	NA
cg23099730	-1.43153	-0.473945	-0.109312	-1.32222	-0.364633	-0.957588	1.02631	12.4605	4.25709e-05	0.0523362	0.618569	0.590554	0.680777	0.849231	NA	NA
cg05107618	1.28144	0.773146	0.610491	0.670954	0.162655	0.508299	0.761399	12.4442	4.2968e-05	0.0526647	0.700619	0.604496	0.59086	0.485125	NA	NA
cg19456061	0.853956	0.730234	0.56871	0.285246	0.161524	0.123723	2.16446	12.4436	4.29823e-05	0.0526647	0.853632	0.798951	0.786133	0.768379	NA	NA
cg16811988	-1.3232	-0.509839	-0.422234	-0.900969	-0.0876044	-0.813365	-0.0672575	12.4369	4.31484e-05	0.0527374	0.41954	0.488246	0.50929	0.670862	NA	NA
cg26116326	-1.12648	-0.783792	0.096729	-1.22321	-0.880522	-0.342685	-0.694555	12.4342	4.32147e-05	0.0527374	0.323993	0.322425	0.439172	0.537442	NA	NA
cg11444704	-1.5624	-1.44776	-1.10537	-0.457033	-0.342392	-0.114641	-2.79389	12.4324	4.32583e-05	0.0527374	0.0881521	0.17056	0.187339	0.22825	p	CCNJL
cg08952497	-1.59413	-0.469006	-0.254322	-1.33981	-0.214684	-1.12513	0.479636	12.4264	4.34058e-05	0.0527511	0.513804	0.552345	0.613691	0.723943	NA	NA
cg15763670	-1.6838	-0.457984	-0.172409	-1.51139	-0.285575	-1.22581	-0.947882	12.4244	4.34563e-05	0.0527511	0.300348	0.304624	0.37116	0.508334	NA	NA
cg10063403	1.37883	0.250498	0.263618	1.11522	-0.0131202	1.12834	1.30738	12.4232	4.34862e-05	0.0527511	0.74989	0.713109	0.706242	0.541478	NA	NA
cg04139452	-1.59005	-0.203341	-0.2126	-1.37745	0.00925881	-1.38671	1.65686	12.4127	4.37463e-05	0.0529244	0.709596	0.72222	0.751154	0.888908	NA	NA
cg22271374	-1.38824	-0.448966	-0.642686	-0.745551	0.19372	-0.939271	0.230385	12.4116	4.37741e-05	0.0529244	0.469554	0.575365	0.546439	0.708038	p7	TRPM2
cg10006442	-1.25389	-0.485261	-0.0258364	-1.22805	-0.459424	-0.768626	-0.217047	12.4074	4.38795e-05	0.0529641	0.42936	0.367922	0.485549	0.644754	NA	NA
cg26309221	0.548548	0.922329	0.259974	0.288574	0.662355	-0.373781	2.81122	12.4005	4.40526e-05	0.0530854	0.904827	0.871047	0.832831	0.838914	NA	NA
cg06396346	-1.36042	-0.345005	-0.103855	-1.25656	-0.24115	-1.01541	-0.537802	12.3915	4.428e-05	0.0532295	0.3689	0.339182	0.427024	0.606953	NA	NA
cg11382630	-1.78504	-0.709512	-0.440412	-1.34462	-0.2691	-1.07552	0.562794	12.39	4.4318e-05	0.0532295	0.528566	0.496612	0.639016	0.776624	NA	NA
cg19985018	1.12369	0.421309	0.0213445	1.10235	0.399964	0.702385	1.90161	12.3831	4.44935e-05	0.0533525	0.817311	0.814037	0.770665	0.663539	NA	NA
cg27150896	-1.66493	-0.646489	0.0107426	-1.67567	-0.657231	-1.01844	1.49691	12.3702	4.48225e-05	0.0536589	0.676428	0.677405	0.770326	0.826141	NA	NA
cg11518764	0.548447	0.829192	0.87989	-0.331443	-0.0506976	-0.280745	-1.17108	12.3632	4.50014e-05	0.0537235	0.390459	0.23602	0.263711	0.293918	NA	NA
cg09081069	1.33535	0.495323	-0.163495	1.49884	0.658818	0.840023	-0.054327	12.3618	4.50383e-05	0.0537235	0.549442	0.537054	0.461633	0.31782	NA	NA
cg06330250	-1.64812	-0.425288	0.355498	-2.00362	-0.780786	-1.22283	1.32686	12.3595	4.50971e-05	0.0537235	0.667519	0.60727	0.723886	0.883169	NA	NA
cg24078375	1.09582	0.230669	-0.246104	1.34192	0.476773	0.86515	0.644851	12.3528	4.52707e-05	0.0538424	0.638907	0.671666	0.592481	0.463513	NA	NA
cg07052794	-1.29061	-0.914102	-0.112581	-1.17803	-0.801521	-0.376506	-0.388681	12.3459	4.54498e-05	0.0538912	0.366221	0.340524	0.500081	0.612324	NA	NA
cg19940231	-1.63926	-0.569421	-0.162625	-1.47664	-0.406796	-1.06984	0.202199	12.3455	4.54593e-05	0.0538912	0.470321	0.469625	0.561953	0.737177	p4	FAM107A
cg19655051	-1.30826	-0.253278	0.217074	-1.52533	-0.470352	-1.05498	0.591962	12.3403	4.55966e-05	0.0539664	0.556001	0.555912	0.599133	0.772068	NA	NA
cg07552538	0.82152	0.860441	0.870331	-0.04881	-0.00988948	-0.0389206	0.490199	12.3186	4.61664e-05	0.0541929	0.681195	0.501059	0.51401	0.538987	NA	NA
cg11823253	-1.23438	-0.645579	-0.0386085	-1.19577	-0.60697	-0.5888	-0.478229	12.3116	4.63509e-05	0.0541929	0.364838	0.344715	0.462856	0.579945	NA	NA
cg11127156	-1.0445	0.00716206	0.991667	-2.03617	-0.984505	-1.05167	1.75745	12.309	4.64198e-05	0.0541929	0.779866	0.570008	0.761713	0.895593	NA	NA
cg24791478	-1.30391	-0.618668	-0.192545	-1.11136	-0.426123	-0.685239	-0.589518	12.3089	4.64227e-05	0.0541929	0.338485	0.340638	0.440866	0.598831	NA	NA
cg12029753	1.3184	0.0596584	-0.385969	1.70437	0.445628	1.25874	0.600885	12.3085	4.64335e-05	0.0541929	0.63868	0.626355	0.605512	0.40525	p	ERC2
cg14286335	-1.62086	-0.227189	-0.252322	-1.36854	0.025133	-1.39367	0.827402	12.3055	4.65146e-05	0.0541929	0.573703	0.661286	0.624003	0.825566	NA	NA
cg22745397	-1.34596	-0.342978	-0.0849358	-1.26102	-0.258042	-1.00298	0.318981	12.303	4.6581e-05	0.0541929	0.510018	0.486616	0.565556	0.744666	NA	NA
cg02838118	1.74139	-0.633274	-0.687793	2.42918	0.0545187	2.37466	-0.945947	12.303	4.65815e-05	0.0541929	0.341944	0.420122	0.396621	0.15907	p4	C1orf103
cg23155861	-0.392223	-0.929795	-0.208096	-0.184127	-0.721699	0.537572	1.14799	12.3029	4.65847e-05	0.0541929	0.621507	0.626945	0.748953	0.742539	NA	NA
cg08896387	-1.53123	-0.727868	0.0363088	-1.56754	-0.764177	-0.803365	1.20369	12.3022	4.66017e-05	0.0541929	0.622806	0.590515	0.726378	0.875359	NA	NA
cg23642200	-1.34976	-0.220788	0.241934	-1.5917	-0.462722	-1.12897	-3.03917	12.3021	4.66044e-05	0.0541929	0.0935708	0.107733	0.121418	0.185569	p2	NLGN1
cg05631456	-1.50559	-0.424874	0.245277	-1.75086	-0.670151	-1.08071	1.18022	12.2982	4.67086e-05	0.0542278	0.616614	0.656453	0.720213	0.776592	NA	NA
cg13414270	1.32629	0.776213	0.41049	0.915798	0.365723	0.550076	0.334606	12.2901	4.69277e-05	0.0543956	0.648927	0.541246	0.500245	0.417316	NA	NA
cg16898283	-0.960865	-0.6862	-0.174222	-0.786643	-0.511978	-0.274665	0.707207	12.2863	4.70291e-05	0.0544202	0.545535	0.611296	0.652265	0.751507	NA	NA
cg14588463	-1.5332	-0.342968	-0.259043	-1.27416	-0.0839253	-1.19024	-0.277469	12.2838	4.70979e-05	0.0544202	0.394125	0.444303	0.465734	0.638085	NA	NA
cg01525816	-0.974712	-0.897235	-0.494219	-0.480493	-0.403016	-0.0774772	0.247923	12.2788	4.72313e-05	0.0544355	0.452741	0.54511	0.609119	0.635504	NA	NA
cg10297617	-1.86731	-0.681876	-0.140113	-1.72719	-0.541763	-1.18543	0.271282	12.2778	4.72602e-05	0.0544355	0.481758	0.420683	0.583499	0.776156	NA	NA
cg14942617	-1.27961	-0.698234	-0.720044	-0.559568	0.0218096	-0.581378	0.444105	12.2693	4.74898e-05	0.0546137	0.491509	0.608489	0.616454	0.680835	NA	NA
cg10790954	-0.303447	0.692601	1.32209	-1.62554	-0.629488	-0.996048	2.40521	12.2648	4.7614e-05	0.0546493	0.863978	0.754783	0.824757	0.861924	NA	NA
cg17512380	-1.48154	-0.648233	-0.724378	-0.757159	0.0761447	-0.833303	1.99073	12.2627	4.76704e-05	0.0546493	0.743258	0.801083	0.8082	0.881696	NA	NA
cg08463186	-1.13038	-0.493273	-0.0486351	-1.08175	-0.444638	-0.637108	0.082387	12.2595	4.77582e-05	0.0546642	0.460631	0.451848	0.547543	0.674058	NA	NA
cg08267612	1.45318	0.620113	0.0730207	1.38016	0.547093	0.833069	0.166852	12.2565	4.78418e-05	0.0546742	0.59371	0.567447	0.502414	0.325186	NA	NA
cg05050889	-1.18501	-0.2249	0.083532	-1.26854	-0.308432	-0.960105	0.494781	12.2519	4.79693e-05	0.0547342	0.545994	0.54685	0.59362	0.723554	NA	NA
cg05852056	-1.03165	-0.808239	-0.53486	-0.496787	-0.273379	-0.223408	-1.09322	12.246	4.81299e-05	0.0548318	0.258449	0.310555	0.362986	0.474262	NA	NA
cg22779781	-1.54409	-0.452137	-0.206408	-1.33768	-0.245729	-1.09196	0.136806	12.2432	4.82097e-05	0.0548372	0.453508	0.499246	0.534749	0.748222	NA	NA
cg01636354	-1.23844	-0.551843	-0.52903	-0.709411	-0.022813	-0.686598	1.41111	12.2404	4.82855e-05	0.0548379	0.658506	0.760414	0.743181	0.80188	NA	NA
cg01806192	1.04633	0.461429	0.452676	0.593655	0.00875323	0.584902	1.22694	12.2365	4.83955e-05	0.0548776	0.742367	0.687636	0.694702	0.533775	NA	NA
cg23408990	1.2922	0.278545	0.323697	0.968505	-0.0451518	1.01366	0.148749	12.2251	4.87138e-05	0.0550446	0.571066	0.532868	0.52335	0.358869	NA	NA
cg12328162	-1.34391	-0.510165	-0.0501869	-1.29372	-0.459978	-0.833746	0.962475	12.2228	4.87788e-05	0.0550446	0.610293	0.564775	0.678562	0.825588	NA	NA
cg23437967	-1.30229	-0.665912	-0.0430207	-1.25927	-0.622891	-0.636382	-1.15235	12.2166	4.89539e-05	0.0550446	0.256677	0.269644	0.353037	0.47042	NA	NA
cg01340194	1.55053	-0.590391	-0.576315	2.12684	-0.0140757	2.14092	2.56952	12.2148	4.90045e-05	0.0550446	0.833679	0.862688	0.87174	0.722043	NA	NA
cg08352439	1.03596	0.211254	-0.922472	1.95843	1.13373	0.824702	1.16582	12.2126	4.90666e-05	0.0550446	0.721842	0.728104	0.658193	0.561803	NA	NA
cg11550950	-1.37406	-0.759514	-0.215844	-1.15822	-0.54367	-0.614551	-0.0315143	12.2114	4.90981e-05	0.0550446	0.423249	0.454098	0.539483	0.653107	NA	NA
cg08638929	-1.58979	-0.436284	0.094977	-1.68476	-0.531261	-1.1535	0.291526	12.2114	4.91002e-05	0.0550446	0.506644	0.42996	0.585495	0.72825	p3	TSPAN1
cg01870690	-1.61319	-0.423809	-0.174832	-1.43835	-0.248977	-1.18938	-0.959295	12.2098	4.91458e-05	0.0550446	0.293695	0.293409	0.355775	0.601024	p	CSRP1
cg14256511	-1.70531	-0.27505	0.317298	-2.02261	-0.592348	-1.43026	0.968835	12.2052	4.92741e-05	0.0551038	0.619765	0.553411	0.673222	0.843755	NA	NA
cg18200389	1.57003	-0.159604	-0.107167	1.6772	-0.0524373	1.72963	2.4867	12.1974	4.94969e-05	0.055217	0.862283	0.845031	0.862946	0.689422	NA	NA
cg09899215	-1.25164	-0.517103	0.0995078	-1.35115	-0.616611	-0.73454	-0.825396	12.1941	4.95908e-05	0.055217	0.318707	0.264237	0.409223	0.525902	p1	LDHD
cg04309595	-1.14751	-0.543281	-0.116017	-1.03149	-0.427264	-0.604228	-0.308907	12.1937	4.96022e-05	0.055217	0.399998	0.372029	0.47403	0.639224	NA	NA
cg10148702	-1.54575	-0.759475	-0.623117	-0.922634	-0.136358	-0.786276	0.342304	12.1851	4.98482e-05	0.0553096	0.476833	0.549219	0.60346	0.699262	NA	NA
cg00350074	-2.23924	-0.439796	-0.106105	-2.13313	-0.333691	-1.79944	0.678621	12.182	4.99394e-05	0.0553096	0.530596	0.558889	0.628848	0.835289	NA	NA
cg00975979	-1.80051	0.33474	-0.175544	-1.62496	0.510284	-2.13525	-2.04484	12.1789	5.00278e-05	0.0553096	0.180938	0.261218	0.153275	0.439197	p1	SHISA8
cg13854271	1.09435	0.75982	0.376555	0.7178	0.383266	0.334534	-0.0943137	12.1765	5.00984e-05	0.0553096	0.569125	0.462734	0.448351	0.321729	NA	NA
cg10485752	-1.18231	-0.621471	-0.197053	-0.98526	-0.424418	-0.560842	-0.397706	12.1735	5.01839e-05	0.0553096	0.368794	0.384654	0.4733	0.609889	p	MAN1C1
cg00760067	-0.88794	-0.626085	-0.0786456	-0.809295	-0.547439	-0.261856	0.099229	12.1731	5.01953e-05	0.0553096	0.454902	0.47467	0.560698	0.64979	NA	NA
cg00961679	1.41481	0.175864	-0.123519	1.53833	0.299384	1.23895	-0.105107	12.1724	5.02156e-05	0.0553096	0.528835	0.513232	0.478553	0.296922	NA	NA
cg12470218	-1.74427	-0.446624	-0.0176641	-1.7266	-0.42896	-1.29764	-0.0167121	12.1693	5.03075e-05	0.0553274	0.426926	0.42632	0.537258	0.687694	NA	NA
cg14788224	-1.31411	-0.674993	-0.507608	-0.806503	-0.167385	-0.639118	0.580871	12.165	5.04319e-05	0.0553284	0.52051	0.589551	0.620788	0.777269	NA	NA
cg11132223	-1.30047	-0.665768	0.115538	-1.41601	-0.781306	-0.634706	0.793503	12.1615	5.05334e-05	0.0553284	0.575395	0.500401	0.659999	0.829327	NA	NA
cg17674725	-1.31475	-0.190045	0.20777	-1.52252	-0.397815	-1.1247	-0.719848	12.156	5.06936e-05	0.0553284	0.339424	0.399511	0.365914	0.584124	NA	NA
cg00741432	-1.60784	-0.973861	-0.529857	-1.07799	-0.444004	-0.633983	-1.01019	12.155	5.07242e-05	0.0553284	0.259985	0.316995	0.376907	0.574244	p	PARM1
cg02967115	1.41648	-0.158721	-0.584628	2.00111	0.425907	1.5752	1.93761	12.1535	5.07688e-05	0.0553284	0.790913	0.847751	0.807029	0.602778	NA	NA
cg19588012	1.44764	0.222627	0.26649	1.18115	-0.0438628	1.22502	1.84125	12.1528	5.07874e-05	0.0553284	0.811016	0.767511	0.773262	0.654813	NA	NA
cg07110405	-1.84569	-0.515507	-0.36163	-1.48406	-0.153877	-1.33018	0.482659	12.1496	5.08808e-05	0.0553284	0.512533	0.556397	0.584037	0.802812	NA	NA
cg23344459	1.4405	-0.0622592	0.166526	1.27397	-0.228785	1.50276	0.835188	12.1449	5.10195e-05	0.0553284	0.655648	0.648449	0.662915	0.459042	NA	NA
cg09303427	0.950556	0.824661	0.107832	0.842724	0.716829	0.125895	2.03897	12.1429	5.10791e-05	0.0553284	0.845706	0.819162	0.758127	0.731892	NA	NA
cg03233490	-1.51915	-0.283529	0.190464	-1.70961	-0.473993	-1.23562	-0.125422	12.1391	5.11912e-05	0.0553284	0.440529	0.412335	0.4887	0.666279	NA	NA
cg07589691	-1.80975	-0.319933	-0.69201	-1.11774	0.372078	-1.48981	-2.70152	12.1389	5.11987e-05	0.0553284	0.102742	0.1794	0.132784	0.304315	p1	SYPL2
cg04473209	-1.4917	-0.323016	-0.0945045	-1.3972	-0.228511	-1.16869	1.35807	12.1382	5.12176e-05	0.0553284	0.650993	0.668263	0.714924	0.871826	NA	NA
cg02838492	-1.46192	-0.373895	0.0743938	-1.53632	-0.448289	-1.08803	0.123529	12.1235	5.16554e-05	0.0557189	0.476444	0.453766	0.521615	0.752908	p1	KIF12
cg20244241	-1.5508	-0.918828	-0.32155	-1.22925	-0.597278	-0.631971	-2.26153	12.1203	5.17508e-05	0.0557395	0.138499	0.152324	0.215485	0.287081	p	TBC1D2B
cg17072045	1.54392	0.553966	0.0895159	1.4544	0.46445	0.989954	2.49838	12.1135	5.19552e-05	0.0558773	0.885873	0.836886	0.822951	0.735649	NA	NA
cg26575105	-1.57466	-0.687243	0.0110421	-1.5857	-0.698285	-0.887418	0.345022	12.1066	5.21627e-05	0.0560179	0.495421	0.460659	0.59993	0.740434	NA	NA
cg11442259	-2.26914	-0.15925	0.286229	-2.55537	-0.445479	-2.10989	1.7715	12.0999	5.23674e-05	0.056035	0.735708	0.701845	0.768341	0.881587	NA	NA
cg21816128	1.51086	0.405437	0.299308	1.21155	0.106129	1.10542	1.27348	12.0999	5.23674e-05	0.056035	0.758182	0.677817	0.67896	0.561016	NA	NA
cg25620989	-1.32285	-0.340859	0.101926	-1.42477	-0.442786	-0.981988	-0.32662	12.0967	5.2463e-05	0.056035	0.402233	0.385734	0.472776	0.588649	NA	NA
cg03312984	1.92132	0.360415	-0.307592	2.22891	0.668007	1.5609	2.47286	12.0956	5.24963e-05	0.056035	0.872957	0.884177	0.832157	0.648022	NA	NA
cg07336123	-1.58372	-0.410602	-0.401202	-1.18252	-0.0093993	-1.17312	-0.59876	12.0893	5.26877e-05	0.056035	0.336267	0.42278	0.409214	0.576509	NA	NA
cg10551832	-1.57137	-0.678032	-0.274494	-1.29688	-0.403538	-0.893342	-1.41403	12.0864	5.2776e-05	0.056035	0.221577	0.241189	0.306369	0.467013	NA	NA
cg16001722	-1.51815	-0.568393	-0.238038	-1.28011	-0.330355	-0.949754	-1.96796	12.0862	5.27835e-05	0.056035	0.168793	0.187626	0.227358	0.353588	NA	NA
cg14645027	-1.57358	-0.212843	0.00947547	-1.58306	-0.222319	-1.36074	-0.237477	12.0859	5.27925e-05	0.056035	0.417666	0.399004	0.464111	0.678899	p1	KRT7
cg06848034	1.2741	0.453358	0.749679	0.524417	-0.296321	0.820738	2.15036	12.0787	5.30148e-05	0.0561536	0.851507	0.780092	0.808576	0.6972	NA	NA
cg20033091	-1.38599	-0.526707	-0.216858	-1.16913	-0.30985	-0.859282	-0.788099	12.0766	5.30779e-05	0.0561536	0.32112	0.300557	0.407312	0.528077	NA	NA
cg22076676	-1.1567	-0.631976	-0.0963596	-1.06034	-0.535617	-0.524719	-0.948855	12.0748	5.31349e-05	0.0561536	0.28778	0.305104	0.374147	0.524069	NA	NA
cg10179694	1.56472	0.556792	0.0867526	1.47797	0.47004	1.00793	1.46166	12.0594	5.36097e-05	0.0564652	0.777968	0.76042	0.707088	0.563395	NA	NA
cg10936796	-1.18342	-0.361976	-0.260616	-0.922808	-0.10136	-0.821448	0.622587	12.0551	5.37446e-05	0.0564652	0.549659	0.598301	0.606398	0.768931	p1	ENST00000448241
cg07451084	-1.3933	0.615715	-0.146318	-1.24698	0.762033	-2.00901	-3.66494	12.0517	5.38515e-05	0.0564652	0.0813699	0.0746108	0.0550877	0.168521	p1	GNPDA2
cg14302446	-0.856483	-0.806174	-0.344528	-0.511955	-0.461646	-0.0503095	-0.537681	12.0507	5.38804e-05	0.0564652	0.341724	0.376736	0.47077	0.51125	NA	NA
cg04111659	-1.25706	-0.569256	-0.0900058	-1.16706	-0.47925	-0.687808	0.840213	12.0472	5.39902e-05	0.0564652	0.564372	0.613637	0.656824	0.79938	NA	NA
cg21959598	2.15205	0.522349	-0.171431	2.32349	0.69378	1.6297	1.21926	12.046	5.40278e-05	0.0564652	0.760248	0.715042	0.670039	0.432071	NA	NA
cg04216046	-1.37612	-0.290582	-0.0422695	-1.33385	-0.248313	-1.08554	-0.800065	12.0454	5.40474e-05	0.0564652	0.313478	0.355638	0.377487	0.57888	NA	NA
cg25065809	-1.77876	-0.393689	-0.0657193	-1.71304	-0.32797	-1.38507	-0.616698	12.0435	5.41065e-05	0.0564652	0.34013	0.349553	0.404924	0.658516	NA	NA
cg06893832	-1.58549	-0.687609	-0.497211	-1.08828	-0.190399	-0.897877	1.626	12.0398	5.42228e-05	0.0564652	0.675047	0.753735	0.767227	0.881397	NA	NA
cg25537033	1.31919	0.870491	0.409668	0.909524	0.460823	0.448701	1.53849	12.0382	5.42756e-05	0.0564652	0.797003	0.767405	0.679106	0.612967	p7	SDK1
cg10612251	1.31157	0.481942	0.219722	1.09185	0.26222	0.829631	1.66006	12.038	5.42803e-05	0.0564652	0.807389	0.754632	0.732389	0.622354	NA	NA
cg25227866	-1.61154	-0.429734	-0.186	-1.42554	-0.243733	-1.1818	0.702409	12.0293	5.45568e-05	0.0566721	0.563159	0.559283	0.633274	0.786906	NA	NA
cg12024427	-1.18044	-0.580619	-0.24403	-0.936411	-0.336588	-0.599823	0.846016	12.0199	5.48558e-05	0.0569018	0.594844	0.590693	0.663207	0.768211	NA	NA
cg18592515	-1.05825	-0.574786	-0.18027	-0.877982	-0.394516	-0.483466	0.53474	12.012	5.5107e-05	0.0570812	0.525472	0.545835	0.621981	0.745625	NA	NA
cg17921991	-1.26183	-0.591586	-0.116794	-1.14504	-0.474792	-0.670245	0.299359	12.0004	5.548e-05	0.057318	0.495405	0.487398	0.578488	0.727831	NA	NA
cg06786804	-1.5585	-0.639138	-0.418847	-1.13965	-0.220292	-0.919358	-0.134881	11.999	5.55257e-05	0.057318	0.402053	0.423796	0.50751	0.707902	NA	NA
cg11365185	-1.06776	-0.790846	-0.541175	-0.526584	-0.249671	-0.276912	-1.41992	11.9952	5.56501e-05	0.057318	0.219438	0.253252	0.318689	0.387131	NA	NA
cg01184901	-1.11138	-0.664734	-0.207851	-0.903528	-0.456883	-0.446645	0.236047	11.9941	5.56841e-05	0.057318	0.463699	0.523578	0.59341	0.655522	NA	NA
cg26039685	-1.26957	0.232939	-0.166177	-1.10339	0.399116	-1.50251	2.09743	11.9928	5.5728e-05	0.057318	0.795822	0.825242	0.783367	0.882478	NA	NA
cg22253596	0.678824	0.908729	0.436847	0.241977	0.471882	-0.229905	3.46312	11.9888	5.58554e-05	0.0573682	0.93711	0.914375	0.89005	0.902615	NA	NA
cg10491127	-1.36751	-0.335241	0.132793	-1.5003	-0.468034	-1.03226	-0.0392676	11.9834	5.60332e-05	0.0574124	0.439543	0.449977	0.524349	0.647375	NA	NA
cg06582079	-1.38253	-0.393842	0.152948	-1.53548	-0.54679	-0.988689	0.502654	11.9827	5.60556e-05	0.0574124	0.562851	0.447283	0.593447	0.758609	NA	NA
cg04604708	-0.838449	-0.610364	-7.80034e-05	-0.838371	-0.610286	-0.228085	0.282188	11.9758	5.62814e-05	0.0575629	0.499621	0.453376	0.591888	0.690789	NA	NA
cg26749761	1.33374	0.62574	0.454088	0.879648	0.171652	0.707996	-1.50323	11.9674	5.65568e-05	0.0577016	0.326179	0.249896	0.238511	0.167123	NA	NA
cg14015706	-2.68301	-0.509326	-0.5678	-2.11521	0.0584743	-2.17368	-3.23993	11.965	5.66369e-05	0.0577016	0.071303	0.0985616	0.101477	0.336333	NA	NA
cg21012054	-1.07072	-0.846171	-0.156434	-0.914288	-0.689737	-0.224552	0.0901069	11.964	5.667e-05	0.0577016	0.440172	0.429711	0.579881	0.67972	NA	NA
cg11868461	0.0723838	0.820776	1.22604	-1.15366	-0.405269	-0.748392	-0.475504	11.9611	5.67652e-05	0.0577016	0.500865	0.32124	0.374802	0.436796	NA	NA
cg26263390	0.559791	0.761602	0.581689	-0.021898	0.179913	-0.201811	1.46485	11.9597	5.68121e-05	0.0577016	0.779597	0.723966	0.688249	0.706933	NA	NA
cg19702194	-1.19483	0.262339	-0.173938	-1.02089	0.436277	-1.45717	2.05625	11.9452	5.72936e-05	0.0580602	0.797277	0.818318	0.777284	0.875668	NA	NA
cg14997450	1.60955	0.313887	0.267772	1.34177	0.046115	1.29566	2.29786	11.9443	5.73242e-05	0.0580602	0.862864	0.815963	0.827769	0.670029	NA	NA
cg07913086	1.47431	0.265589	-0.0588641	1.53317	0.324453	1.20872	1.86484	11.94	5.74698e-05	0.0580951	0.803793	0.814728	0.77435	0.632218	NA	NA
cg20982659	-0.792534	0.819414	0.934981	-1.72752	-0.115567	-1.61195	3.0616	11.9385	5.75177e-05	0.0580951	0.908247	0.857818	0.860316	0.931389	NA	NA
cg25403283	-1.4443	-0.348211	0.0379291	-1.48223	-0.38614	-1.09609	0.784159	11.9329	5.77065e-05	0.0581359	0.596799	0.536142	0.64456	0.794335	NA	NA
cg05928849	-1.23845	-1.01865	-0.795028	-0.443425	-0.223626	-0.2198	-0.433313	11.9299	5.781e-05	0.0581359	0.340937	0.39304	0.494808	0.570871	NA	NA
cg27113059	-0.50841	-1.06154	-2.05362	1.54521	0.992085	0.553129	-3.49423	11.9275	5.78883e-05	0.0581359	0.0561679	0.178487	0.10501	0.10999	p1	LIPG
cg07484496	-1.53843	-0.457078	0.0490208	-1.58745	-0.506099	-1.08135	0.515251	11.927	5.79075e-05	0.0581359	0.531488	0.509722	0.606991	0.779228	NA	NA
cg13689699	-1.12067	-0.530493	-0.688078	-0.432597	0.157586	-0.590182	0.81224	11.9207	5.81214e-05	0.0581359	0.583016	0.620464	0.656598	0.751141	NA	NA
cg10512006	-0.531431	-0.930292	-0.272268	-0.259163	-0.658023	0.398861	-0.0616135	11.9177	5.82235e-05	0.0581359	0.426198	0.42229	0.556824	0.59435	NA	NA
cg08015382	-1.30261	-0.482696	0.0874471	-1.39006	-0.570143	-0.819912	-0.841436	11.9166	5.82599e-05	0.0581359	0.316639	0.283886	0.393436	0.541134	NA	NA
cg14287557	-1.00648	-1.10056	-1.18942	0.182945	0.0888596	0.0940854	-1.19719	11.9154	5.83013e-05	0.0581359	0.222361	0.356173	0.359972	0.425624	p1	C15orf52
cg10721284	-1.28574	-0.194934	-0.14045	-1.14529	-0.0544843	-1.09081	-0.0462282	11.9143	5.83363e-05	0.0581359	0.443171	0.495748	0.504564	0.62319	NA	NA
cg17755923	1.34195	0.377518	-0.200722	1.54267	0.57824	0.964431	-3.06931	11.9138	5.83543e-05	0.0581359	0.126245	0.141858	0.10201	0.0657076	p1	EPHA2
cg26599081	-1.42682	-0.500576	-0.371585	-1.05523	-0.128991	-0.926242	1.27727	11.9114	5.84373e-05	0.0581393	0.638442	0.701999	0.720343	0.844215	p36	SATB1
cg12510999	-1.09602	-0.724826	-0.346596	-0.749424	-0.37823	-0.371193	0.47065	11.9076	5.85663e-05	0.0581884	0.507038	0.555109	0.628999	0.693966	NA	NA
cg25662907	-1.05823	-0.560327	-0.194591	-0.863641	-0.365736	-0.497905	0.502219	11.9047	5.86652e-05	0.0582074	0.532387	0.53567	0.611554	0.73946	NA	NA
cg00549851	1.06496	0.41164	-0.185976	1.25093	0.597616	0.653318	1.52767	11.9011	5.87896e-05	0.0582517	0.776269	0.771743	0.713082	0.620495	NA	NA
cg03659776	1.58604	0.544798	-0.0549527	1.64099	0.599751	1.04124	2.20791	11.8985	5.88789e-05	0.0582611	0.856845	0.837518	0.791392	0.665237	NA	NA
cg10839569	2.07513	0.187415	0.216322	1.85881	-0.0289065	1.88771	1.59289	11.89	5.9173e-05	0.0582704	0.792193	0.734936	0.752401	0.517908	NA	NA
cg02485605	-1.3366	-0.433748	0.148694	-1.4853	-0.582442	-0.902856	0.797393	11.8879	5.92462e-05	0.0582704	0.578143	0.578672	0.654423	0.785986	NA	NA
cg12598169	1.40939	0.572486	0.439178	0.970211	0.133308	0.836903	1.17673	11.8867	5.92859e-05	0.0582704	0.762136	0.643027	0.658889	0.555586	NA	NA
cg00215712	-1.13442	-0.540123	-0.306356	-0.828068	-0.233767	-0.594301	-0.144122	11.8857	5.93231e-05	0.0582704	0.424724	0.431262	0.500362	0.638577	NA	NA
cg09505233	-1.17378	-0.856351	-0.552043	-0.621735	-0.304308	-0.317426	0.397083	11.885	5.9347e-05	0.0582704	0.489086	0.510728	0.614911	0.732059	NA	NA
cg03242819	-1.44004	-1.64529	0.0540204	-1.49406	-1.69931	0.20525	-1.51724	11.8828	5.94227e-05	0.0582704	0.192519	0.203724	0.392038	0.420059	p2	FAM196A
cg24956866	-1.24925	-0.142122	0.363704	-1.61295	-0.505826	-1.10713	-1.05003	11.8821	5.94469e-05	0.0582704	0.309023	0.267006	0.327506	0.499555	p1	CALD1
cg20203818	-1.16305	-0.52977	-0.172929	-0.99012	-0.35684	-0.63328	-0.399967	11.8749	5.96966e-05	0.0583523	0.37896	0.383274	0.46438	0.58985	p10	ARHGAP24
cg16974350	-1.5339	-0.587103	-0.176272	-1.35763	-0.410831	-0.946795	0.472537	11.8725	5.97812e-05	0.0583523	0.513789	0.516834	0.605107	0.777577	NA	NA
cg02102075	-1.69601	-0.599957	-0.0792036	-1.61681	-0.520753	-1.09605	-0.251355	11.8704	5.98564e-05	0.0583523	0.381818	0.417877	0.507304	0.629325	NA	NA
cg22706402	-0.722948	-0.78364	-0.523337	-0.199612	-0.260304	0.060692	-1.33184	11.8701	5.98644e-05	0.0583523	0.233647	0.289057	0.32296	0.381806	NA	NA
cg11984552	-1.50952	-0.629836	-0.468888	-1.04064	-0.160948	-0.879689	0.870752	11.8672	5.99689e-05	0.0583523	0.564459	0.615612	0.65294	0.847615	NA	NA
cg05779469	-0.90994	-0.684567	-0.336315	-0.573625	-0.348252	-0.225374	0.260442	11.866	6.00098e-05	0.0583523	0.477764	0.519567	0.583653	0.681682	NA	NA
cg07650665	-1.21738	-0.469442	0.104778	-1.32215	-0.57422	-0.747934	0.79207	11.8586	6.02725e-05	0.0584722	0.586513	0.549233	0.663059	0.768393	NA	NA
cg23097878	-0.874817	-0.855772	-0.63727	-0.237546	-0.218501	-0.0190447	-1.27248	11.8549	6.04008e-05	0.0584722	0.224626	0.312248	0.35859	0.362658	p	CRY2
cg24799921	2.55389	-0.068197	0.365744	2.18815	-0.433941	2.62209	-2.24401	11.8535	6.04521e-05	0.0584722	0.244201	0.206031	0.19045	0.102787	NA	NA
cg09622121	1.45058	0.969189	0.38692	1.06366	0.582269	0.481387	-2.89311	11.8534	6.04534e-05	0.0584722	0.161056	0.150089	0.104094	0.0817422	NA	NA
cg24473594	-1.46978	-0.609593	-0.492345	-0.977435	-0.117249	-0.860186	-0.360683	11.8464	6.0704e-05	0.0585972	0.368685	0.428094	0.462655	0.64404	p	DKFZp434J0226
cg16055241	-1.47671	-0.205012	0.156388	-1.6331	-0.3614	-1.2717	-1.59477	11.8453	6.07431e-05	0.0585972	0.222218	0.225502	0.245233	0.4634	NA	NA
cg20277282	-1.35312	0.123797	0.380355	-1.73348	-0.256557	-1.47692	1.31395	11.8413	6.08851e-05	0.0586567	0.706547	0.598754	0.69079	0.846872	NA	NA
cg07779313	-1.14273	-0.552588	-0.140436	-1.00229	-0.412153	-0.590142	-1.16869	11.8388	6.09733e-05	0.05866	0.263184	0.267798	0.33955	0.462086	NA	NA
cg19059861	1.24562	0.596085	-0.132727	1.37834	0.728811	0.64953	0.663631	11.8348	6.11173e-05	0.05866	0.667133	0.677322	0.576713	0.411371	p1	PLUNC
cg14996652	-1.25622	-0.674677	-0.369727	-0.886497	-0.30495	-0.581547	0.447771	11.8345	6.11295e-05	0.05866	0.497022	0.547973	0.61832	0.719413	NA	NA
cg00141394	-1.6507	-0.43787	-0.682226	-0.968477	0.244356	-1.21283	1.87202	11.8269	6.14005e-05	0.0587944	0.71916	0.806458	0.77648	0.887386	NA	NA
cg26839252	0.298917	0.975067	0.434833	-0.135916	0.540234	-0.67615	-1.55674	11.825	6.14715e-05	0.0587944	0.319412	0.260305	0.197195	0.258397	p1	MRPL18
cg06340234	-1.20391	0.157974	0.383504	-1.58742	-0.225529	-1.36189	-1.89101	11.8239	6.15111e-05	0.0587944	0.202022	0.201034	0.200955	0.352609	p4	GRID2
cg11825899	-1.57933	-0.819327	-0.58226	-0.997074	-0.237067	-0.760007	-0.449504	11.8175	6.174e-05	0.0588897	0.339284	0.432468	0.458608	0.624662	NA	NA
cg06500792	-1.12325	-0.707824	-0.300267	-0.822985	-0.407557	-0.415427	-0.596141	11.8146	6.18458e-05	0.0588897	0.33962	0.377223	0.444037	0.525979	NA	NA
cg25027334	-1.53561	-0.646534	0.0463276	-1.58194	-0.692862	-0.889076	-3.17112	11.8144	6.18527e-05	0.0588897	0.0802713	0.0755201	0.11883	0.208652	p2	PLOD2
cg00650889	-1.1334	0.101006	1.05046	-2.18386	-0.949457	-1.2344	-0.283666	11.8118	6.19488e-05	0.0589044	0.451938	0.336504	0.470101	0.552393	NA	NA
cg09359521	-1.24725	-0.566802	-0.170704	-1.07655	-0.396098	-0.680451	-0.153968	11.8079	6.20923e-05	0.0589161	0.420463	0.403499	0.497304	0.691591	NA	NA
cg06623218	1.28384	0.345097	0.260658	1.02318	0.0844391	0.938742	2.11096	11.807	6.21225e-05	0.0589161	0.845218	0.788637	0.795604	0.694529	NA	NA
cg11780785	1.09636	0.419378	0.268567	0.827791	0.150811	0.67698	0.825824	11.7939	6.26046e-05	0.0589382	0.690318	0.626522	0.615188	0.499968	p2	PMFBP1
cg01635555	-1.72714	-0.509188	-0.424215	-1.30293	-0.0849731	-1.21796	-0.108283	11.7936	6.26145e-05	0.0589382	0.431694	0.404957	0.489957	0.731255	NA	NA
cg14153069	-1.43565	-0.293194	-0.230314	-1.20534	-0.0628798	-1.14246	0.519648	11.7879	6.28241e-05	0.0589382	0.544809	0.540084	0.589144	0.77388	p4	PHYHD1
cg15851462	1.45683	0.385225	0.343295	1.11353	0.0419298	1.0716	0.953123	11.7875	6.28383e-05	0.0589382	0.717944	0.629196	0.63291	0.483797	NA	NA
cg12700039	-1.41755	-0.647435	-0.404727	-1.01282	-0.242708	-0.77011	0.203155	11.7871	6.28527e-05	0.0589382	0.456098	0.512468	0.571185	0.710263	p	TBC1D16
cg11582180	-1.39436	-0.382698	-0.0588102	-1.33555	-0.323888	-1.01166	-1.37305	11.7851	6.2929e-05	0.0589382	0.242566	0.232787	0.294257	0.470478	NA	NA
cg24622589	-1.426	-0.405136	0.0851724	-1.51117	-0.490309	-1.02086	-0.317874	11.7841	6.29641e-05	0.0589382	0.391129	0.379836	0.478362	0.632408	p4	FAM107A
cg20034086	1.22905	0.276117	-0.125414	1.35446	0.401531	0.952928	1.77212	11.7839	6.29714e-05	0.0589382	0.805064	0.784967	0.757567	0.63577	NA	NA
cg05010648	-1.52249	-0.0822136	-0.0569806	-1.46551	-0.025233	-1.44028	-1.18618	11.7828	6.30131e-05	0.0589382	0.284979	0.257052	0.29462	0.533509	NA	NA
cg20274462	-1.31275	-0.738515	-0.422381	-0.89037	-0.316134	-0.574236	-1.30514	11.7827	6.3017e-05	0.0589382	0.233049	0.264944	0.330646	0.439338	NA	NA
cg11572509	1.45615	0.373315	0.000601916	1.45555	0.372713	1.08283	2.46976	11.7784	6.31773e-05	0.0589382	0.860997	0.866763	0.830929	0.739056	NA	NA
cg24854925	-1.44964	-0.778812	-0.25521	-1.19443	-0.523602	-0.670832	0.159432	11.7733	6.33679e-05	0.0589382	0.437314	0.505474	0.572503	0.710746	p1	LINCR-0003
cg19045353	1.26635	0.586905	0.0171836	1.24917	0.569721	0.679446	0.214924	11.7732	6.33705e-05	0.0589382	0.603336	0.565801	0.481958	0.416671	NA	NA
cg14920797	1.07947	0.721301	0.520395	0.559079	0.200906	0.358174	2.18096	11.7708	6.34597e-05	0.0589382	0.861189	0.7842	0.782905	0.724616	NA	NA
cg08789145	-0.95577	-0.636795	-0.286933	-0.668837	-0.349862	-0.318975	-1.2999	11.7681	6.3562e-05	0.0589382	0.244083	0.261181	0.329804	0.388082	NA	NA
cg22457527	-0.216194	-0.975806	-0.864496	0.648301	-0.11131	0.759611	-2.09854	11.7681	6.35627e-05	0.0589382	0.149836	0.214844	0.249204	0.165151	p1	ROBO1
cg19923326	-0.794579	-0.697317	-0.235183	-0.559396	-0.462134	-0.097262	0.286474	11.7671	6.35971e-05	0.0589382	0.486156	0.517445	0.602729	0.634617	NA	NA
cg07814296	1.06448	0.965234	0.415661	0.648814	0.549573	0.0992414	2.18729	11.7657	6.36501e-05	0.0589382	0.861388	0.828236	0.762882	0.771129	NA	NA
cg02438816	1.13504	0.535282	0.377692	0.757349	0.15759	0.599759	1.70124	11.7649	6.36793e-05	0.0589382	0.81065	0.757167	0.732624	0.648781	NA	NA
cg10034963	1.13977	0.100707	-0.321792	1.46156	0.422499	1.03906	0.293938	11.757	6.39772e-05	0.059139	0.571309	0.610383	0.541495	0.417322	NA	NA
cg08321103	-0.89196	-0.85427	-0.318935	-0.573025	-0.535334	-0.0376907	-2.99032	11.7452	6.44243e-05	0.0594235	0.0857321	0.107153	0.147926	0.140147	p2	TMEM173
cg10290679	-1.222	-0.518574	-0.291946	-0.930051	-0.226628	-0.703423	0.00841676	11.7426	6.45211e-05	0.0594235	0.452351	0.455577	0.511394	0.704317	p4	ETS1
cg14825735	-0.956616	-0.579407	-0.115225	-0.841391	-0.464182	-0.377209	0.449874	11.7412	6.45771e-05	0.0594235	0.51706	0.551805	0.613954	0.693271	NA	NA
cg19762719	-0.830014	-0.741087	-0.526944	-0.30307	-0.214143	-0.0889271	-0.220838	11.7392	6.46534e-05	0.0594235	0.39248	0.458503	0.518424	0.54452	NA	NA
cg26208115	1.4634	0.158676	-0.527124	1.99052	0.6858	1.30472	0.610558	11.7382	6.46918e-05	0.0594235	0.645512	0.627217	0.605792	0.36523	NA	NA
cg18768238	0.94409	0.717032	0.383537	0.560553	0.333495	0.227058	0.792748	11.7283	6.50679e-05	0.0596225	0.692591	0.6434	0.592104	0.512642	p1	WDFY4
cg01119284	-1.08933	-0.77154	-1.07556	-0.0137716	0.304019	-0.31779	0.337569	11.7282	6.50718e-05	0.0596225	0.483167	0.584566	0.576604	0.709135	NA	NA
cg01584457	1.50354	0.196283	0.519968	0.983575	-0.323685	1.30726	1.69308	11.7223	6.52987e-05	0.0596854	0.783547	0.780355	0.762179	0.592165	NA	NA
cg03238702	1.44894	0.589398	0.460223	0.988712	0.129174	0.859537	2.14963	11.7222	6.53039e-05	0.0596854	0.851771	0.825375	0.790022	0.6704	NA	NA
cg17553470	-1.33208	-0.81827	-0.572733	-0.759342	-0.245537	-0.513805	-0.576271	11.715	6.558e-05	0.0597561	0.329601	0.353585	0.451362	0.589817	NA	NA
cg01480447	-1.4327	-0.315132	-0.19305	-1.23965	-0.122082	-1.11757	-0.0240936	11.7139	6.5625e-05	0.0597561	0.441674	0.459001	0.501248	0.713911	NA	NA
cg03303289	-1.22563	0.36376	0.492688	-1.71832	-0.128928	-1.58939	2.77495	11.7138	6.56267e-05	0.0597561	0.869051	0.859726	0.852004	0.913314	NA	NA
cg24203542	-0.920359	-0.599158	0.545172	-1.46553	-1.14433	-0.321201	1.21448	11.7059	6.59357e-05	0.0598816	0.64199	0.627056	0.71782	0.820696	NA	NA
cg17034091	-1.01407	-0.457299	-0.404383	-0.609683	-0.0529162	-0.556767	-0.302373	11.7057	6.59442e-05	0.0598816	0.393576	0.445533	0.475631	0.567046	NA	NA
cg06704093	-0.0680396	-1.11237	-1.8291	1.76106	0.716732	1.04433	-1.57198	11.704	6.60105e-05	0.0598816	0.192363	0.41729	0.319994	0.230004	NA	NA
cg17193151	1.10583	0.72902	0.282873	0.822959	0.446147	0.376812	2.46393	11.7004	6.61483e-05	0.0598863	0.879269	0.854926	0.813228	0.778066	NA	NA
cg09206588	-1.2853	-0.608745	-0.540167	-0.745136	-0.0685779	-0.676558	-0.215533	11.6996	6.61797e-05	0.0598863	0.390348	0.470242	0.487626	0.647468	NA	NA
cg00389614	1.31176	0.34962	0.0897107	1.22205	0.259909	0.962144	0.733605	11.6943	6.6389e-05	0.0599769	0.66928	0.636327	0.614955	0.45475	NA	NA
cg23127089	-1.38938	-0.362925	-0.37841	-1.01097	0.0154852	-1.02645	1.17238	11.6929	6.64441e-05	0.0599769	0.633623	0.692006	0.696069	0.813826	NA	NA
cg03526142	1.09299	0.599712	0.205344	0.88765	0.394368	0.493282	0.363525	11.6857	6.67249e-05	0.0601374	0.630815	0.576955	0.518101	0.418088	p1	SLFN12L
cg19451463	-1.51144	-0.376809	-0.457391	-1.05405	0.0805826	-1.13463	0.487903	11.6842	6.67867e-05	0.0601374	0.520796	0.620617	0.583743	0.73714	NA	NA
cg08770685	1.15136	0.390719	0.119351	1.03201	0.271368	0.760637	0.423484	11.6817	6.68829e-05	0.0601499	0.633225	0.559172	0.546054	0.44674	NA	NA
cg14568422	-0.721731	-0.963671	-0.765749	0.0440183	-0.197922	0.24194	0.309967	11.6783	6.70195e-05	0.060197	0.480689	0.543752	0.596841	0.660517	p20	TCF4
cg19892567	-1.34727	-0.308671	0.119969	-1.46724	-0.42864	-1.0386	1.33539	11.6727	6.7242e-05	0.060197	0.677867	0.643909	0.733518	0.814829	NA	NA
cg26562184	-2.00684	-0.442649	-0.0802802	-1.92656	-0.362369	-1.56419	0.427027	11.6691	6.73843e-05	0.060197	0.511758	0.490766	0.578015	0.8181	p1	TMEM212
cg09722212	1.54535	0.180558	-0.0297491	1.5751	0.210307	1.36479	-0.108385	11.6684	6.74139e-05	0.060197	0.524851	0.528662	0.475299	0.297914	NA	NA
cg26175343	-1.19336	-0.719936	-0.146582	-1.04677	-0.573354	-0.473419	-0.353574	11.6679	6.74341e-05	0.060197	0.372028	0.3915	0.485902	0.605507	p1	LRRN4
cg00390450	-1.3223	-0.540172	-0.264071	-1.05823	-0.276101	-0.782131	0.728439	11.6649	6.75503e-05	0.060197	0.557076	0.600288	0.650375	0.765424	NA	NA
cg08191562	1.35298	0.528529	0.0559918	1.29699	0.472537	0.824455	1.65007	11.663	6.76271e-05	0.060197	0.800746	0.762504	0.737518	0.596642	NA	NA
cg12381367	-1.84791	-0.2432	0.0527569	-1.90066	-0.295957	-1.60471	0.688672	11.6602	6.77401e-05	0.060197	0.577904	0.534652	0.607791	0.822121	NA	NA
cg00344766	0.797984	0.719435	0.324478	0.473506	0.394957	0.0785492	2.05594	11.6599	6.77537e-05	0.060197	0.843016	0.816034	0.766375	0.752013	NA	NA
cg15066337	-1.05147	-0.534584	-0.131447	-0.920022	-0.403138	-0.516885	0.734347	11.6567	6.78787e-05	0.060197	0.566818	0.572204	0.647946	0.777099	p1	CLDN16
cg00176801	-1.39124	-0.225569	-0.142077	-1.24916	-0.0834914	-1.16567	0.651129	11.6555	6.793e-05	0.060197	0.557875	0.57796	0.608784	0.776749	NA	NA
cg07659892	-0.995767	-0.735122	-0.0970241	-0.898743	-0.638097	-0.260646	-2.09731	11.6515	6.8088e-05	0.060197	0.154185	0.151304	0.239138	0.275215	NA	NA
cg08321382	-1.35773	-0.287529	-0.0998338	-1.25789	-0.187695	-1.0702	-0.869489	11.6495	6.81693e-05	0.060197	0.313619	0.310564	0.368959	0.542449	NA	NA
cg23251761	-0.539213	-1.05699	-1.00617	0.466961	-0.0508119	0.517773	0.415719	11.6494	6.81749e-05	0.060197	0.489854	0.577755	0.620185	0.659895	NA	NA
cg21810373	-1.60769	-0.87808	-0.520381	-1.0873	-0.357699	-0.729606	0.895186	11.6487	6.82028e-05	0.060197	0.554572	0.629225	0.679879	0.821253	NA	NA
cg10624729	-1.49644	-0.255066	-0.00367413	-1.49277	-0.251391	-1.24138	1.31524	11.6474	6.82542e-05	0.060197	0.664577	0.696171	0.725133	0.815863	NA	NA
cg08390352	-1.60266	-0.384304	-0.18776	-1.41489	-0.196543	-1.21835	-0.901379	11.6374	6.86595e-05	0.0603777	0.308663	0.304174	0.369985	0.534653	p1,p1	GPER1,C7ORF50
cg08804124	-1.35547	-0.652815	-0.233466	-1.122	-0.419348	-0.702656	0.0702955	11.637	6.86757e-05	0.0603777	0.441009	0.464716	0.539305	0.730353	NA	NA
cg21685266	-1.07473	-0.606765	-0.473624	-0.601107	-0.13314	-0.467967	-2.8548	11.6354	6.87434e-05	0.0603777	0.102685	0.11436	0.136956	0.200147	p1	EHHADH
cg06630567	-1.51536	-0.216033	-0.13625	-1.37911	-0.0797831	-1.29932	0.653232	11.6342	6.87899e-05	0.0603777	0.567906	0.56928	0.607433	0.787665	p1	AMBP
cg07385846	-1.32122	-0.327538	-0.101168	-1.22005	-0.226371	-0.993682	-0.0509474	11.6271	6.90794e-05	0.0605515	0.456269	0.433137	0.501416	0.657357	NA	NA
cg25313855	-1.03841	0.275158	0.4919	-1.53031	-0.216742	-1.31357	-0.016678	11.6253	6.91536e-05	0.0605515	0.507034	0.414901	0.462474	0.674538	p	EFNA5
cg02245859	-1.30889	-0.0823233	0.235757	-1.54465	-0.31808	-1.22657	0.957425	11.6194	6.93958e-05	0.0606052	0.620263	0.638982	0.658422	0.773541	NA	NA
cg18217031	-1.10107	-0.480636	-0.44297	-0.658105	-0.0376664	-0.620439	-0.461747	11.6189	6.94168e-05	0.0606052	0.371464	0.415482	0.427709	0.59916	p,p	BCL9L,MIR4492
cg05381746	-1.85437	-0.359958	0.83839	-2.69276	-1.19835	-1.49441	-2.21823	11.6178	6.94639e-05	0.0606052	0.149214	0.131829	0.232888	0.351368	p3	MKX
cg00313452	-1.94179	-0.343141	0.215119	-2.15691	-0.55826	-1.59865	0.343778	11.6119	6.97049e-05	0.0607429	0.516543	0.439159	0.574878	0.755603	NA	NA
cg18209489	-0.750924	-0.910826	-0.285229	-0.465695	-0.625598	0.159902	0.0262516	11.6051	6.99861e-05	0.0609152	0.435247	0.436634	0.575508	0.615022	NA	NA
cg06413569	-1.1023	-0.0895506	0.618039	-1.72034	-0.70759	-1.01275	0.498056	11.5957	7.03816e-05	0.0611598	0.5727	0.484887	0.580021	0.750705	NA	NA
cg15642312	-0.737608	-0.848713	-0.446377	-0.291231	-0.402336	0.111105	-1.51868	11.5944	7.04346e-05	0.0611598	0.206241	0.248664	0.320244	0.311418	p19	EIF4G1
cg13557709	1.50542	0.331168	0.0921133	1.41331	0.239054	1.17425	-0.257513	11.592	7.05352e-05	0.0611744	0.507977	0.51173	0.442086	0.267793	NA	NA
cg00250409	-1.4645	-0.502529	-0.00939758	-1.4551	-0.493132	-0.961969	0.433373	11.5834	7.08961e-05	0.0614144	0.517304	0.482382	0.597769	0.781122	NA	NA
cg27303679	1.2341	0.426841	0.207087	1.02701	0.219754	0.807256	2.3332	11.5811	7.09908e-05	0.0614236	0.865078	0.822868	0.810935	0.729921	NA	NA
cg14598116	-1.64505	-0.245937	0.452758	-2.09781	-0.698694	-1.39912	-0.0866695	11.5746	7.12678e-05	0.0615903	0.449657	0.401548	0.50781	0.638652	NA	NA
cg13420642	0.85066	0.649978	0.4515	0.39916	0.198478	0.200682	2.85766	11.5627	7.17729e-05	0.0616835	0.904528	0.869566	0.858656	0.830403	NA	NA
cg12535280	-0.244613	-1.65607	-1.24155	0.996941	-0.414519	1.41146	-1.6473	11.5615	7.1824e-05	0.0616835	0.187182	0.327279	0.391287	0.234073	NA	NA
cg11088661	1.2045	0.389297	-0.38068	1.58518	0.769977	0.815204	0.200418	11.5614	7.18289e-05	0.0616835	0.590519	0.573156	0.502594	0.370286	NA	NA
cg17701740	-1.48577	-0.792114	-0.725035	-0.76073	-0.0670791	-0.693651	-0.125509	11.5611	7.18415e-05	0.0616835	0.391066	0.457345	0.518345	0.681486	NA	NA
cg25325752	-1.91567	-0.264384	-0.504231	-1.41144	0.239846	-1.65128	2.09054	11.5611	7.18431e-05	0.0616835	0.741628	0.807419	0.79194	0.9201	NA	NA
cg02681497	0.869202	0.591493	-0.0473868	0.916589	0.63888	0.277709	2.23156	11.5599	7.18911e-05	0.0616835	0.852723	0.847009	0.790318	0.771722	NA	NA
cg05879394	-1.35764	-0.79187	-0.44652	-0.911115	-0.34535	-0.565765	-0.308793	11.5582	7.19669e-05	0.0616835	0.372501	0.391988	0.490384	0.664542	NA	NA
cg23060991	-1.22787	-0.560374	0.211863	-1.43973	-0.772238	-0.667493	-0.36739	11.5549	7.21052e-05	0.0617136	0.393348	0.328902	0.469996	0.648341	NA	NA
cg03667968	-0.255837	1.03081	-0.464046	0.208209	1.49486	-1.28665	-1.02461	11.5522	7.22231e-05	0.0617136	0.388536	0.485144	0.220839	0.464377	p1	APC
cg13850921	-1.20573	-0.492132	-0.203472	-1.00226	-0.28866	-0.7136	-0.552776	11.5514	7.22556e-05	0.0617136	0.368153	0.338072	0.424619	0.591128	NA	NA
cg04737087	1.10863	0.179625	-0.157034	1.26567	0.336659	0.929008	-0.7393	11.546	7.24906e-05	0.0618398	0.415559	0.387296	0.382265	0.24843	NA	NA
cg19625347	-1.25461	-0.264484	-0.00946271	-1.24515	-0.255021	-0.990124	0.93716	11.5429	7.26221e-05	0.0618398	0.61542	0.611592	0.66541	0.797024	NA	NA
cg03292088	1.99223	0.144911	-0.227606	2.21983	0.372517	1.84732	3.54938	11.5406	7.2723e-05	0.0618398	0.933576	0.931307	0.918785	0.790675	NA	NA
cg01546793	0.877733	-0.46993	-0.967493	1.84523	0.497563	1.34766	1.56532	11.5402	7.2742e-05	0.0618398	0.725533	0.807961	0.770349	0.619126	NA	NA
cg06071533	-1.31771	-0.283312	-0.131243	-1.18647	-0.15207	-1.0344	-0.161794	11.5364	7.29029e-05	0.0619045	0.427243	0.431782	0.480856	0.663412	NA	NA
cg17071957	-0.990298	-0.74164	-0.436781	-0.553518	-0.304859	-0.248658	-0.54896	11.5316	7.31115e-05	0.061928	0.349759	0.357605	0.454804	0.543194	p7	GSN
cg13844455	1.42374	0.0913154	-0.216075	1.63981	0.30739	1.33242	0.845636	11.5297	7.31965e-05	0.061928	0.672987	0.667459	0.641768	0.467285	NA	NA
cg17607238	1.56529	0.230491	-0.485568	2.05085	0.716059	1.33479	-0.258956	11.5286	7.32452e-05	0.061928	0.515149	0.479051	0.444146	0.278623	p1	IPCEF1
cg04047276	-1.22864	-0.662312	-0.200488	-1.02815	-0.461823	-0.566329	0.652366	11.528	7.32698e-05	0.061928	0.54322	0.551037	0.654032	0.750735	p3	CARS
cg06436504	-1.615	-0.335762	-0.434426	-1.18057	0.0986643	-1.27924	2.36503	11.5257	7.33691e-05	0.0619402	0.788691	0.860021	0.838387	0.908143	p4	C3ORF26
cg04010471	-0.276072	0.242235	2.02278	-2.29885	-1.78054	-0.518307	-5.03069	11.5173	7.37398e-05	0.0621028	0.0330299	0.0189821	0.0462688	0.0352251	NA	NA
cg22416908	-1.28525	-0.46363	-0.383103	-0.90215	-0.0805271	-0.821623	1.57233	11.5167	7.37634e-05	0.0621028	0.69162	0.720986	0.73948	0.873008	NA	NA
cg07026666	-1.59628	-0.233809	-0.371041	-1.22524	0.137232	-1.36247	-0.192041	11.5155	7.38168e-05	0.0621028	0.424746	0.420915	0.468077	0.675822	NA	NA
cg21572000	-1.54952	-0.7232	-0.527468	-1.02205	-0.195732	-0.826321	1.12372	11.5113	7.40047e-05	0.062123	0.604762	0.684216	0.714619	0.807717	NA	NA
cg26888760	-1.30165	-0.445313	-0.0290981	-1.27255	-0.416215	-0.856339	0.0852323	11.5096	7.40766e-05	0.062123	0.467966	0.451904	0.531515	0.701425	NA	NA
cg10139326	1.26821	0.417758	0.0798861	1.18832	0.337872	0.850451	0.621572	11.5088	7.41119e-05	0.062123	0.669968	0.59808	0.579796	0.434955	NA	NA
cg12231009	1.13034	0.570786	0.771913	0.358423	-0.201126	0.559549	0.679498	11.506	7.42352e-05	0.062123	0.678217	0.569642	0.56952	0.549902	p1	ENST00000556919
cg00283706	-0.92557	-0.561033	0.0916019	-1.01717	-0.652635	-0.364538	0.780606	11.5053	7.42661e-05	0.062123	0.579859	0.552494	0.67036	0.756113	NA	NA
cg25655799	-0.71257	-0.177734	-1.9995	1.28693	1.82176	-0.534836	-2.79312	11.4977	7.46052e-05	0.0622412	0.112484	0.3015	0.100916	0.226356	p4	KCNMA1
cg14390322	-1.62135	-0.391256	-0.186193	-1.43516	-0.205063	-1.2301	0.220864	11.4971	7.46311e-05	0.0622412	0.485518	0.482585	0.540559	0.754938	NA	NA
cg07921501	1.12118	0.673072	0.465098	0.656086	0.207973	0.448112	0.50637	11.4964	7.46631e-05	0.0622412	0.656818	0.580696	0.552769	0.426086	NA	NA
cg04445379	-1.17753	-0.532791	0.165339	-1.34287	-0.69813	-0.644735	-0.312556	11.4904	7.49293e-05	0.0623263	0.391625	0.38368	0.490699	0.59159	NA	NA
cg23637008	-1.38523	-0.663925	-0.398062	-0.987172	-0.265863	-0.721309	-0.411162	11.4903	7.4936e-05	0.0623263	0.363788	0.422245	0.464108	0.577763	p2	NPLOC4
cg27012446	1.40993	-0.0397427	0.0912127	1.31872	-0.130955	1.44968	-2.22548	11.48	7.53961e-05	0.062524	0.203997	0.154993	0.196133	0.111567	p2,p2	LOC100506746,AFF1
cg06805844	1.52985	0.704321	-0.191794	1.72164	0.896115	0.825528	1.26067	11.4797	7.54121e-05	0.062524	0.745433	0.800936	0.658693	0.497721	NA	NA
cg25988421	-1.28565	-0.979444	-0.95129	-0.334363	-0.0281543	-0.306208	-0.61251	11.4793	7.54305e-05	0.062524	0.3037	0.403149	0.455441	0.562433	NA	NA
cg09862861	1.46924	0.822869	0.363322	1.10591	0.459547	0.646366	3.88902	11.4712	7.57959e-05	0.0626272	0.951159	0.943237	0.905959	0.880743	p2	LCN8
cg27033919	1.90322	-0.0531635	-0.109207	2.01243	0.056043	1.95639	-1.09147	11.471	7.5805e-05	0.0626272	0.354789	0.452745	0.341984	0.141416	p1	SNORD28
cg09866472	-1.25126	-0.659557	-0.248121	-1.00314	-0.411436	-0.591705	-0.456165	11.4708	7.58123e-05	0.0626272	0.353905	0.38199	0.469111	0.590144	NA	NA
cg00307819	1.467	0.623306	-0.146158	1.61316	0.769464	0.843693	1.35039	11.4677	7.59551e-05	0.0626292	0.772229	0.736577	0.67936	0.549048	NA	NA
cg02303726	-1.28939	-0.592741	-0.361173	-0.928221	-0.231568	-0.696654	-0.0746609	11.4658	7.604e-05	0.0626292	0.427383	0.439804	0.512887	0.68457	NA	NA
cg26962843	1.25483	0.755141	0.480659	0.774175	0.274482	0.499693	0.367513	11.4651	7.6072e-05	0.0626292	0.65309	0.524408	0.526169	0.390475	NA	NA
cg18532267	-1.46772	-0.461161	0.323964	-1.79168	-0.785126	-1.00656	1.48502	11.462	7.6213e-05	0.0626746	0.677546	0.677514	0.757197	0.863887	NA	NA
cg24686420	-1.51838	-0.89238	-0.101121	-1.41726	-0.79126	-0.625997	-0.519069	11.4586	7.63674e-05	0.0626772	0.327933	0.371897	0.471011	0.614002	p	SPIDR
cg04409354	-1.36455	-0.033555	0.55268	-1.91723	-0.586235	-1.331	1.09167	11.4564	7.64669e-05	0.0626772	0.657553	0.568991	0.673417	0.822971	NA	NA
cg00430155	-1.60164	-0.861931	-0.163873	-1.43776	-0.698058	-0.739706	-1.3442	11.4563	7.64736e-05	0.0626772	0.233279	0.237213	0.335111	0.452701	p1	AGT
cg22320071	0.764717	-0.100512	0.946468	-0.181751	-1.04698	0.865229	-0.621951	11.4505	7.6738e-05	0.0628234	0.421283	0.299385	0.427982	0.351641	NA	NA
cg15537651	1.34608	0.0534429	-0.324293	1.67037	0.377736	1.29263	1.2634	11.4464	7.69287e-05	0.0628862	0.729259	0.740347	0.705324	0.524011	NA	NA
cg07115148	-1.61717	-0.720045	-0.455391	-1.16178	-0.264654	-0.897123	-0.573921	11.4437	7.70493e-05	0.0628862	0.328786	0.381684	0.439743	0.6077	NA	NA
cg22081355	0.841294	1.18677	0.214301	0.626993	0.97247	-0.345477	-1.66892	11.4406	7.71936e-05	0.0628862	0.319367	0.281589	0.180977	0.202179	p1,p1	MYO9B,HAUS8
cg08450554	-1.20086	-0.293521	0.246882	-1.44774	-0.540403	-0.907334	0.0661675	11.4396	7.72407e-05	0.0628862	0.475061	0.445866	0.524608	0.680445	NA	NA
cg24545533	-1.47587	-0.213762	-0.414091	-1.06178	0.200328	-1.26211	1.70885	11.4381	7.73093e-05	0.0628862	0.730788	0.761889	0.757946	0.849956	NA	NA
cg25155942	-0.699333	-0.784324	-0.0737842	-0.625549	-0.710539	0.0849906	-0.244651	11.4376	7.73314e-05	0.0628862	0.39229	0.398545	0.52432	0.568263	NA	NA
cg12659926	0.880579	0.737846	-0.295467	1.17605	1.03331	0.142733	1.19277	11.4281	7.77715e-05	0.0631167	0.745493	0.754315	0.631634	0.574345	NA	NA
cg10034678	-1.55558	-0.460251	0.0631165	-1.6187	-0.523368	-1.09533	-0.806134	11.4274	7.78057e-05	0.0631167	0.319345	0.298275	0.386793	0.579493	NA	NA
cg26624794	-1.78316	-0.668721	-0.260057	-1.5231	-0.408664	-1.11444	1.86156	11.4258	7.78802e-05	0.0631167	0.721194	0.746507	0.801136	0.877305	NA	NA
cg00976594	1.66436	0.100444	0.176507	1.48786	-0.0760633	1.56392	2.38173	11.4241	7.79606e-05	0.0631167	0.865724	0.812799	0.845209	0.672362	NA	NA
cg06294392	-1.97107	0.888449	1.5664	-3.53747	-0.677949	-2.85952	-2.25046	11.4179	7.82505e-05	0.0632813	0.248839	0.0959119	0.142288	0.525802	p1	HMCN2
cg02830178	0.731017	0.807743	0.610471	0.120546	0.197272	-0.0767263	1.46213	11.4131	7.84732e-05	0.0633569	0.786463	0.713133	0.689084	0.659682	NA	NA
cg11858843	-1.49283	-0.102693	-0.533959	-0.958871	0.431266	-1.39014	0.449528	11.4122	7.85176e-05	0.0633569	0.538819	0.569759	0.558985	0.731368	NA	NA
cg22515654	-1.23789	-0.665351	-0.344725	-0.893167	-0.320626	-0.572541	-0.511676	11.4097	7.86358e-05	0.0633823	0.351006	0.371195	0.45402	0.573815	NA	NA
cg12832418	-1.54974	-0.723945	-0.5174	-1.03234	-0.206545	-0.825793	-0.70142	11.4062	7.87981e-05	0.0634183	0.298721	0.397275	0.423857	0.564532	NA	NA
cg07740710	-1.57315	-0.520126	-0.421827	-1.15133	-0.0982989	-1.05303	0.711872	11.4041	7.88994e-05	0.0634183	0.532031	0.630281	0.640796	0.783189	NA	NA
cg08698139	1.23401	0.0293057	-0.13042	1.36443	0.159726	1.20471	1.20186	11.4023	7.89851e-05	0.0634183	0.722136	0.719894	0.691238	0.549613	NA	NA
cg08163918	1.15602	0.773792	0.65039	0.50563	0.123401	0.382229	3.31011	11.4014	7.90279e-05	0.0634183	0.930755	0.9045	0.885045	0.86502	p	SHMT2
cg04714881	-1.30212	-0.34593	0.134739	-1.43685	-0.480669	-0.956185	1.14334	11.397	7.92345e-05	0.0634485	0.633758	0.678339	0.707927	0.759518	NA	NA
cg00058887	-1.51402	-0.572041	0.147237	-1.66126	-0.719278	-0.941979	-0.250805	11.3969	7.92393e-05	0.0634485	0.412656	0.33888	0.485854	0.685953	p1	STOX2
cg23763788	1.58371	0.340052	0.137025	1.44668	0.203027	1.24366	0.451237	11.3943	7.93635e-05	0.0634641	0.64187	0.541317	0.579055	0.363114	NA	NA
cg08917944	-1.10144	-0.926727	-0.286577	-0.814863	-0.64015	-0.174712	-0.999001	11.3929	7.94325e-05	0.0634641	0.266525	0.28219	0.408512	0.46986	NA	NA
cg03876904	1.42177	0.261124	0.0653294	1.35644	0.195795	1.16065	2.67096	11.383	7.99049e-05	0.0636469	0.882784	0.866322	0.859513	0.764237	NA	NA
cg10874300	-1.13087	-0.408265	-0.0106558	-1.12022	-0.397609	-0.722608	-1.47404	11.383	7.99061e-05	0.0636469	0.23924	0.219984	0.28346	0.414109	p13	PIK3R1
cg05328979	-1.26836	-0.388758	0.0460394	-1.3144	-0.434797	-0.879605	-0.410522	11.3826	7.99228e-05	0.0636469	0.383262	0.3832	0.460334	0.574705	NA	NA
cg10941185	-0.83187	-0.847144	-0.752339	-0.0795308	-0.0948049	0.0152741	-0.639148	11.3761	8.02358e-05	0.0638265	0.30839	0.442954	0.449436	0.465527	NA	NA
cg01086490	-1.4062	-0.122955	-0.204786	-1.20141	0.081831	-1.28324	-1.22809	11.3677	8.06393e-05	0.0640777	0.27004	0.358226	0.28617	0.478279	NA	NA
cg11718886	-1.80212	-0.688649	-0.375182	-1.42694	-0.313467	-1.11347	1.17723	11.3589	8.10692e-05	0.0641768	0.62034	0.614751	0.703155	0.870981	NA	NA
cg10108828	-1.46024	-0.412011	-0.24013	-1.22011	-0.171881	-1.04823	0.403636	11.3588	8.1074e-05	0.0641768	0.516177	0.518934	0.580025	0.758536	p16	CYB5R3
cg20891326	-0.757062	-0.772337	-0.45373	-0.303332	-0.318607	0.015275	-0.364609	11.358	8.1114e-05	0.0641768	0.371326	0.418247	0.490624	0.546303	NA	NA
cg14926093	1.84964	0.555017	0.0282783	1.82137	0.526738	1.29463	2.75801	11.3579	8.11155e-05	0.0641768	0.881837	0.901007	0.848215	0.715202	NA	NA
cg05977043	-1.06737	-0.597181	-0.207495	-0.859873	-0.389686	-0.470187	0.648835	11.3554	8.12378e-05	0.064204	0.550643	0.574774	0.639536	0.743794	NA	NA
cg19021961	-1.3488	-0.402187	-0.239723	-1.10907	-0.162464	-0.94661	-0.361632	11.3521	8.14021e-05	0.0642399	0.385057	0.413917	0.451612	0.631493	NA	NA
cg23400056	-1.23854	-0.575448	-0.384888	-0.853655	-0.19056	-0.663095	1.28791	11.3484	8.15811e-05	0.0642399	0.650345	0.661395	0.722143	0.841071	NA	NA
cg00318550	-1.35032	-0.503611	-0.110541	-1.23977	-0.39307	-0.846704	0.382784	11.3475	8.16265e-05	0.0642399	0.514556	0.484062	0.587553	0.752144	NA	NA
cg23012256	-1.41691	-0.776212	-0.252902	-1.16401	-0.52331	-0.640698	0.369658	11.3473	8.16351e-05	0.0642399	0.486714	0.496694	0.60999	0.744618	p	PRICKLE4
cg21836358	1.05985	0.809001	0.968516	0.0913383	-0.159515	0.250853	0.484094	11.3447	8.17638e-05	0.0642719	0.647366	0.572662	0.520676	0.539143	NA	NA
cg10729854	-1.5675	-0.417849	-0.779928	-0.787572	0.362079	-1.14965	0.649759	11.3429	8.18526e-05	0.0642725	0.537316	0.65342	0.613028	0.764654	NA	NA
cg18546840	-1.6907	-0.480538	-0.566524	-1.12418	0.0859866	-1.21017	-0.0389767	11.3403	8.19768e-05	0.0643009	0.432904	0.454544	0.491171	0.750869	p4	FOXP2
cg23140245	1.48853	0.533001	0.336435	1.15209	0.196566	0.955526	-1.40052	11.334	8.22914e-05	0.0644029	0.355128	0.290522	0.270357	0.136047	p	COL14A1
cg07260778	-1.84191	-0.261346	-0.117208	-1.7247	-0.144138	-1.58056	1.44656	11.3299	8.24913e-05	0.0644029	0.672512	0.711382	0.730988	0.873541	NA	NA
cg23209962	-1.11463	-0.545842	-0.776947	-0.33768	0.231104	-0.568784	0.996129	11.3297	8.25025e-05	0.0644029	0.592265	0.715933	0.66218	0.791764	NA	NA
cg11784870	1.27218	0.324314	-0.0629114	1.33509	0.387225	0.947869	1.64776	11.3274	8.26182e-05	0.0644029	0.794753	0.762183	0.736906	0.626309	NA	NA
cg13363829	-0.2187	-0.850107	-0.591272	0.372572	-0.258835	0.631407	-1.39381	11.3187	8.30486e-05	0.0644029	0.23293	0.284135	0.329714	0.279507	p1	IL17RC
cg15831480	-0.912384	-0.784964	-0.370912	-0.541473	-0.414052	-0.12742	-1.52263	11.3173	8.3122e-05	0.0644029	0.208372	0.238875	0.308344	0.346736	NA	NA
cg16595765	1.05685	0.40632	-0.315943	1.3728	0.722263	0.650533	0.467693	11.3162	8.31755e-05	0.0644029	0.619573	0.65562	0.544655	0.436464	NA	NA
cg27408657	-1.44154	-0.576287	-0.679123	-0.76242	0.102836	-0.865256	0.145777	11.316	8.31873e-05	0.0644029	0.447555	0.532389	0.548739	0.700728	NA	NA
cg22621652	-1.43796	-0.61656	-0.349328	-1.08863	-0.267232	-0.821401	1.42206	11.3151	8.32305e-05	0.0644029	0.666792	0.691103	0.736892	0.867809	p1	FAM180A
cg19399302	1.22978	-0.491413	-0.0795732	1.30935	-0.411839	1.72119	3.07787	11.3144	8.32646e-05	0.0644029	0.874075	0.861812	0.910011	0.788379	NA	NA
cg20628541	-1.07953	-0.613987	-0.811591	-0.267944	0.197604	-0.465548	2.26827	11.3123	8.33732e-05	0.0644029	0.771825	0.85366	0.811737	0.910643	NA	NA
cg15336255	-0.920464	-0.662749	-0.374336	-0.546128	-0.288413	-0.257716	-0.961907	11.3087	8.35529e-05	0.0644029	0.288852	0.30378	0.380143	0.471486	p1	LOC285419
cg13001289	-1.46504	-0.752809	-0.391582	-1.07346	-0.361227	-0.71223	-0.298144	11.3065	8.3663e-05	0.0644029	0.383298	0.40751	0.488341	0.631526	NA	NA
cg08441931	-1.9141	-0.283429	0.0705871	-1.98469	-0.354016	-1.63067	-3.54941	11.3057	8.37019e-05	0.0644029	0.0702376	0.0575192	0.0813666	0.216114	NA	NA
cg14834925	-0.935927	-0.795807	-0.0840116	-0.851915	-0.711795	-0.14012	-1.00714	11.3051	8.3732e-05	0.0644029	0.285045	0.259505	0.389631	0.472284	NA	NA
cg13256920	0.946121	0.139285	-0.58972	1.53584	0.729005	0.806836	2.47262	11.3049	8.37442e-05	0.0644029	0.853715	0.889878	0.830426	0.778973	NA	NA
cg25036498	-0.953374	-0.685163	-0.237996	-0.715378	-0.447167	-0.268211	-1.92906	11.3033	8.38252e-05	0.0644029	0.16679	0.196519	0.248952	0.294938	NA	NA
cg17882867	-1.1555	-0.721728	-0.267363	-0.888139	-0.454364	-0.433774	-1.64116	11.3018	8.38979e-05	0.0644029	0.193272	0.227268	0.286954	0.358222	NA	NA
cg21335583	-1.15637	0.461787	0.733632	-1.89	-0.271846	-1.61816	0.454188	11.3015	8.39151e-05	0.0644029	0.601166	0.480747	0.531046	0.73287	NA	NA
cg06203243	-1.53911	-0.506463	0.136354	-1.67546	-0.642817	-1.03265	-0.345467	11.2982	8.40813e-05	0.0644029	0.387728	0.376739	0.468432	0.663567	p	ARID1B
cg16139785	0.893268	-0.134553	-0.788344	1.68161	0.653791	1.02782	0.772164	11.2977	8.41088e-05	0.0644029	0.630434	0.71289	0.634245	0.468564	NA	NA
cg11267810	-1.59193	-0.510445	-0.121305	-1.47062	-0.38914	-1.08148	-1.07657	11.2977	8.41097e-05	0.0644029	0.278372	0.258151	0.347166	0.552225	p3	RIN2
cg10688501	1.21708	0.158995	-0.201766	1.41884	0.360761	1.05808	-0.339131	11.2972	8.41353e-05	0.0644029	0.490779	0.470144	0.42731	0.300179	NA	NA
cg11258065	-1.18871	-0.201174	0.12234	-1.31105	-0.323514	-0.987536	-0.388366	11.2941	8.42886e-05	0.0644045	0.40894	0.37297	0.439103	0.591963	NA	NA
cg10671195	1.30777	0.719688	0.237178	1.07059	0.482509	0.588084	1.26589	11.2936	8.43179e-05	0.0644045	0.761534	0.742323	0.661375	0.526333	NA	NA
cg18251218	-1.10589	-0.521009	-0.0233523	-1.08254	-0.497657	-0.584885	-1.40536	11.2899	8.45027e-05	0.0644045	0.232006	0.228488	0.305494	0.43754	NA	NA
cg00152942	-1.49376	-0.438012	0.123218	-1.61697	-0.561229	-1.05574	0.105861	11.2894	8.45313e-05	0.0644045	0.467586	0.416992	0.531904	0.759762	NA	NA
cg05390795	-1.28162	-0.749286	-0.285091	-0.996533	-0.464195	-0.532338	-0.343676	11.2861	8.46995e-05	0.0644045	0.372248	0.378471	0.486081	0.638601	NA	NA
cg22475904	1.15544	0.204279	1.23268	-0.077242	-1.0284	0.951157	-3.45415	11.2848	8.4764e-05	0.0644045	0.110046	0.0481786	0.0933401	0.0631901	p1	PCGF1
cg03736062	1.29054	0.622411	-0.0831741	1.37372	0.705585	0.66813	2.50736	11.2842	8.47924e-05	0.0644045	0.880082	0.86952	0.815052	0.777623	NA	NA
cg21267628	-1.23764	-0.619769	-0.046377	-1.19126	-0.573392	-0.617867	0.134204	11.279	8.50618e-05	0.0644045	0.462402	0.454695	0.568703	0.678833	NA	NA
cg21100932	-1.4142	-0.133824	-0.183115	-1.23108	0.0492909	-1.28038	2.79034	11.2766	8.51838e-05	0.0644045	0.849015	0.875637	0.866629	0.930921	NA	NA
cg09544079	-1.24443	-0.485414	0.00210766	-1.24654	-0.487521	-0.759021	0.856776	11.2755	8.52414e-05	0.0644045	0.593392	0.577604	0.669772	0.788676	NA	NA
cg15945287	-1.898	-0.285976	0.226756	-2.12475	-0.512732	-1.61202	-0.970217	11.2753	8.52531e-05	0.0644045	0.308142	0.273	0.351462	0.58477	p2	TMEM100
cg13015157	0.893251	0.568866	0.523511	0.36974	0.0453547	0.324386	3.2361	11.2746	8.52861e-05	0.0644045	0.924106	0.891544	0.888777	0.872686	NA	NA
cg27015734	1.56674	0.341438	0.452738	1.114	-0.1113	1.2253	-0.793354	11.2712	8.54597e-05	0.0644045	0.433813	0.338313	0.345143	0.284383	p2,p3	GALNT6,SLC4A8
cg00171464	-1.57955	-0.588483	0.105588	-1.68513	-0.694071	-0.991063	0.546532	11.2707	8.54879e-05	0.0644045	0.536302	0.45692	0.621878	0.812597	NA	NA
cg08356262	1.7254	-0.00513928	0.0974094	1.62799	-0.102549	1.73054	1.61872	11.2693	8.5558e-05	0.0644045	0.776541	0.765757	0.775489	0.506695	p	IQGAP2
cg19833632	-1.44343	-0.418581	0.191743	-1.63518	-0.610324	-1.02485	-2.00908	11.2648	8.57905e-05	0.0644045	0.167794	0.193755	0.220432	0.369871	p,p	PFN2,LOC646903
cg04452766	-1.33636	-0.336822	0.0622642	-1.39863	-0.399086	-0.999542	0.357014	11.263	8.58847e-05	0.0644045	0.516331	0.491022	0.572865	0.741572	NA	NA
cg27042842	1.40817	0.526131	-0.325212	1.73338	0.851343	0.882036	1.51071	11.2626	8.59052e-05	0.0644045	0.782668	0.789915	0.709867	0.523564	NA	NA
cg13964105	-1.54309	-0.121866	0.0956467	-1.63874	-0.217513	-1.42122	-2.14545	11.2614	8.5971e-05	0.0644045	0.168857	0.168561	0.183315	0.329505	p2	LRRC3B
cg08137156	-1.55019	0.0198221	-0.529555	-1.02064	0.549377	-1.57001	0.626239	11.2598	8.60516e-05	0.0644045	0.561842	0.622027	0.583548	0.761561	p2	SSBP3
cg07675031	1.71563	0.374193	0.147653	1.56798	0.22654	1.34144	2.96141	11.2597	8.60591e-05	0.0644045	0.904871	0.906132	0.87655	0.748146	p1	SPI1
cg16566089	-1.31922	-0.412934	-0.1254	-1.19382	-0.287534	-0.906288	1.15851	11.2593	8.60776e-05	0.0644045	0.656944	0.595502	0.702165	0.834555	NA	NA
cg23379038	-1.35644	-0.34121	-0.743241	-0.613201	0.402031	-1.01523	1.24932	11.2547	8.63171e-05	0.0645176	0.63265	0.730003	0.703228	0.8182	NA	NA
cg22050877	-1.07246	-0.329999	0.462294	-1.53476	-0.792293	-0.742464	0.674109	11.2526	8.64247e-05	0.0645319	0.584387	0.504586	0.636721	0.758714	NA	NA
cg00959463	1.67771	0.704461	0.162832	1.51488	0.541629	0.973251	-0.101411	11.2508	8.65226e-05	0.0645391	0.571566	0.514814	0.452205	0.236676	NA	NA
cg05251033	-1.32338	-0.610343	-0.166042	-1.15734	-0.444301	-0.713036	-0.456008	11.2465	8.67431e-05	0.0646375	0.363322	0.364911	0.46163	0.600179	NA	NA
cg10642599	-1.42374	-0.608404	-0.589944	-0.833792	-0.0184598	-0.815332	-1.57232	11.2409	8.70412e-05	0.0647935	0.209606	0.248162	0.271507	0.419199	NA	NA
cg09494782	0.967299	0.743246	0.436631	0.530668	0.306615	0.224052	2.23518	11.2307	8.75763e-05	0.0651255	0.857866	0.833973	0.794179	0.739499	NA	NA
cg23225690	-1.74473	-0.486194	-0.216993	-1.52774	-0.269201	-1.25854	-4.03066	11.2283	8.77075e-05	0.0651567	0.0494799	0.0462782	0.0634004	0.151178	NA	NA
cg18053607	-0.761226	-0.957319	-0.547618	-0.213607	-0.409701	0.196093	-0.661707	11.2209	8.80991e-05	0.0653162	0.318884	0.358924	0.463511	0.458304	p1	INPP5J
cg02508848	0.979697	-0.302018	-0.672139	1.65184	0.370121	1.28172	-2.32274	11.22	8.81465e-05	0.0653162	0.186167	0.231225	0.195279	0.121557	p3	ZFP90
cg16253634	-1.45133	-0.303994	0.0123882	-1.46372	-0.316382	-1.14734	-0.619819	11.2192	8.81906e-05	0.0653162	0.353605	0.356898	0.401316	0.594161	p1	CALD1
cg03829839	-1.4937	-0.125394	-0.0166589	-1.47704	-0.108735	-1.3683	0.935942	11.2153	8.83964e-05	0.0653359	0.627934	0.619419	0.644041	0.797978	NA	NA
cg14756780	-1.1296	-0.829814	-0.252219	-0.877377	-0.577595	-0.299782	-1.11024	11.2141	8.84626e-05	0.0653359	0.246954	0.299455	0.382013	0.435926	NA	NA
cg03461110	-1.17792	-1.07229	-0.305982	-0.871935	-0.766309	-0.105626	-0.976872	11.2136	8.84855e-05	0.0653359	0.265321	0.270529	0.425993	0.465503	p	FOXK1
cg01836992	1.02626	-0.177255	-0.346714	1.37297	0.169459	1.20351	3.24133	11.2089	8.87411e-05	0.0653801	0.90299	0.920058	0.908626	0.844993	NA	NA
cg20981219	-0.862116	-0.831035	-0.32751	-0.534606	-0.503525	-0.0310806	-0.71176	11.2077	8.88035e-05	0.0653801	0.316946	0.33988	0.442487	0.494428	NA	NA
cg02795029	-0.874119	0.797036	0.34938	-1.2235	0.447656	-1.67116	-1.97752	11.2075	8.88141e-05	0.0653801	0.239412	0.242972	0.14875	0.328161	NA	NA
cg21613389	-1.0023	-0.669234	-0.404202	-0.598097	-0.265032	-0.333065	-0.136473	11.201	8.91629e-05	0.0654072	0.420291	0.446254	0.507889	0.625547	NA	NA
cg23066564	-1.06975	-0.617621	-0.376632	-0.693117	-0.240989	-0.452128	-0.30697	11.198	8.93265e-05	0.0654072	0.385895	0.418759	0.484383	0.599157	p2	LOC400931
cg02881374	-1.54741	-0.367269	-0.11242	-1.43499	-0.254849	-1.18014	0.759474	11.1974	8.93577e-05	0.0654072	0.578289	0.58281	0.648685	0.747884	NA	NA
cg27394911	0.816935	0.642977	0.24747	0.569465	0.395507	0.173958	1.55929	11.1959	8.94399e-05	0.0654072	0.790036	0.755877	0.706229	0.678127	NA	NA
cg14417782	-1.11749	-0.487769	0.118236	-1.23573	-0.606005	-0.629721	0.46161	11.1959	8.94428e-05	0.0654072	0.543392	0.469351	0.597885	0.75391	NA	NA
cg01819880	-1.63534	-0.214951	0.150316	-1.78566	-0.365268	-1.42039	0.779397	11.1958	8.94489e-05	0.0654072	0.594158	0.525658	0.628369	0.82787	NA	NA
cg10820158	-1.19294	-0.332035	0.158043	-1.35098	-0.490078	-0.860902	-0.748788	11.1938	8.95536e-05	0.0654072	0.338428	0.307906	0.405012	0.503932	NA	NA
cg12543821	-0.996808	-0.747351	-0.449368	-0.54744	-0.297982	-0.249458	1.5325	11.1936	8.95674e-05	0.0654072	0.674626	0.725686	0.781877	0.816854	p	ARL5B
cg19646491	1.27234	0.527629	0.256482	1.01586	0.271146	0.744709	1.02239	11.1887	8.98301e-05	0.0654593	0.73325	0.666997	0.633059	0.500268	p	FHAD1
cg19437677	-1.2426	-0.720952	-0.485001	-0.7576	-0.235952	-0.521648	-0.646943	11.1885	8.98443e-05	0.0654593	0.32022	0.361757	0.431857	0.578154	NA	NA
cg13430376	-1.13334	-0.575201	-0.153936	-0.979404	-0.421265	-0.558139	0.780376	11.1854	9.0014e-05	0.0654593	0.561265	0.586951	0.654269	0.796903	NA	NA
cg22057673	-0.942974	-0.951912	-0.513535	-0.429439	-0.438377	0.00893833	1.15318	11.1841	9.00841e-05	0.0654593	0.586486	0.709452	0.720984	0.805258	NA	NA
cg00179272	0.530673	1.03721	0.666741	-0.136067	0.370469	-0.506536	0.0902441	11.184	9.00893e-05	0.0654593	0.614109	0.483741	0.437645	0.449302	p	TMIGD3
cg16672582	-1.42875	-0.11883	0.747036	-2.17578	-0.865866	-1.30992	-0.508842	11.1812	9.02398e-05	0.0654593	0.406371	0.263048	0.432142	0.605931	NA	NA
cg26029864	1.95662	0.0255077	-0.347656	2.30428	0.373163	1.93111	0.224621	11.179	9.03585e-05	0.0654593	0.562788	0.611587	0.554094	0.321708	p2	LTBP4
cg23984989	1.3461	0.243277	-0.0182517	1.36436	0.261528	1.10283	2.53168	11.1787	9.03798e-05	0.0654593	0.872913	0.869657	0.841872	0.729603	NA	NA
cg20148334	-1.20735	-0.118038	-1.23282	0.0254627	1.11478	-1.08932	0.856413	11.1739	9.06434e-05	0.0654593	0.602787	0.707261	0.616532	0.732522	NA	NA
cg06544882	-1.07016	0.443068	0.742506	-1.81266	-0.299438	-1.51322	0.886081	11.1707	9.08143e-05	0.0654593	0.669368	0.535781	0.623655	0.710968	NA	NA
cg04979685	-1.15239	-0.823936	-0.521568	-0.630825	-0.302368	-0.328457	-0.702945	11.1707	9.08181e-05	0.0654593	0.310843	0.349842	0.435775	0.532666	NA	NA
cg15260437	1.48234	0.300123	-0.0786985	1.56104	0.378822	1.18222	3.72214	11.1701	9.08482e-05	0.0654593	0.939099	0.943393	0.925203	0.840424	NA	NA
cg15332386	-1.00947	-0.603354	0.0241622	-1.03364	-0.627517	-0.406119	-0.698159	11.1696	9.08802e-05	0.0654593	0.321207	0.335119	0.432143	0.527219	p1	SYNE1
cg06191260	1.61883	0.364503	0.0462982	1.57253	0.318204	1.25432	0.475313	11.1693	9.08936e-05	0.0654593	0.636433	0.605784	0.570385	0.363073	NA	NA
cg20768760	-1.43636	-0.580889	0.112437	-1.5488	-0.693325	-0.855471	0.22156	11.1676	9.099e-05	0.0654641	0.493671	0.413681	0.582023	0.670079	NA	NA
cg05167973	1.25394	0.162328	0.0614465	1.19249	0.100882	1.09161	-0.876495	11.1632	9.12321e-05	0.0655737	0.397671	0.363051	0.360736	0.203306	NA	NA
cg07933297	-0.946383	-0.547452	-0.463978	-0.482406	-0.0834737	-0.398932	-0.382523	11.159	9.14625e-05	0.065587	0.374928	0.430522	0.459576	0.586288	NA	NA
cg23815853	-1.40492	-0.530475	-0.399563	-1.00536	-0.130912	-0.874447	0.846665	11.1552	9.16755e-05	0.065587	0.590699	0.598882	0.656407	0.792654	NA	NA
cg15522953	-1.15587	0.0216448	0.800845	-1.95671	-0.7792	-1.17751	1.78032	11.1547	9.17015e-05	0.065587	0.765785	0.671955	0.763487	0.875917	NA	NA
cg18110150	1.56395	0.514874	0.288781	1.27517	0.226093	1.04907	0.624713	11.154	9.17423e-05	0.065587	0.686506	0.560557	0.567467	0.457712	NA	NA
cg20375342	-1.74442	-0.0960187	0.21251	-1.95693	-0.308528	-1.6484	-1.82114	11.153	9.17944e-05	0.065587	0.203304	0.18766	0.232031	0.431352	p1	FAM19A4
cg23654401	1.49027	0.295221	0.259363	1.23091	0.035858	1.19505	-0.24227	11.1524	9.18319e-05	0.065587	0.511087	0.474626	0.458934	0.288706	p3	VOPP1
cg11740194	1.36467	0.209348	-0.256657	1.62133	0.466005	1.15532	5.00286	11.1515	9.18792e-05	0.065587	0.974576	0.972394	0.965933	0.942871	NA	NA
cg15528028	-1.34021	-0.0407612	0.173296	-1.51351	-0.214057	-1.29945	-0.538229	11.1489	9.20281e-05	0.0655998	0.386232	0.356185	0.39726	0.611401	NA	NA
cg25016677	-1.48387	-0.123714	0.267334	-1.75121	-0.391049	-1.36016	-0.468127	11.1468	9.2145e-05	0.0655998	0.398842	0.327822	0.423198	0.623766	NA	NA
cg00848471	-0.881038	-0.729948	-0.738068	-0.14297	0.0081207	-0.15109	0.134256	11.1464	9.21667e-05	0.0655998	0.443412	0.555796	0.559182	0.642189	NA	NA
cg04744917	-1.52422	-0.0598181	0.261888	-1.78611	-0.321707	-1.4644	-2.61005	11.1426	9.23794e-05	0.065631	0.129692	0.115857	0.133863	0.325215	NA	NA
cg02786793	-1.17927	-0.334869	-0.23566	-0.943606	-0.0992085	-0.844397	0.170325	11.142	9.24101e-05	0.065631	0.475326	0.531257	0.53014	0.710625	p8	DAB2IP
cg11580269	-1.66754	-0.305272	-0.0351917	-1.63234	-0.27008	-1.36226	1.01635	11.1408	9.24802e-05	0.065631	0.630018	0.557096	0.674175	0.83272	NA	NA
cg01297700	0.734488	0.453341	-0.389401	1.12389	0.842743	0.281146	2.83958	11.137	9.26938e-05	0.0656678	0.891584	0.899893	0.854689	0.839414	NA	NA
cg12413156	0.404068	0.871764	0.23615	0.167918	0.635613	-0.467695	1.92333	11.1367	9.27119e-05	0.0656678	0.832057	0.785293	0.726932	0.762532	p1	LIME1
cg25607267	-1.23994	-0.472621	-0.130308	-1.10963	-0.342313	-0.767322	0.378563	11.1291	9.31368e-05	0.0658012	0.515353	0.505357	0.581169	0.743884	NA	NA
cg02117150	1.11221	0.458601	0.0401648	1.07204	0.418437	0.653605	1.40324	11.1275	9.32288e-05	0.0658012	0.760566	0.759891	0.705624	0.577477	NA	NA
cg14623374	1.39518	0.579125	0.279583	1.1156	0.299542	0.816054	0.504502	11.127	9.32556e-05	0.0658012	0.648346	0.606077	0.560197	0.394369	NA	NA
cg06863994	1.2244	0.679795	0.0557052	1.16869	0.62409	0.5446	0.676663	11.1269	9.32606e-05	0.0658012	0.678418	0.652974	0.562131	0.46768	p,p	KANSL1-AS1,KANSL1
cg27448447	-0.562938	-0.925303	-0.643743	0.0808058	-0.28156	0.362365	0.107426	11.1219	9.35472e-05	0.0659397	0.444898	0.505046	0.57057	0.624518	NA	NA
cg27335585	0.838466	0.568179	0.0825816	0.755884	0.485597	0.270287	2.11886	11.1196	9.36784e-05	0.0659685	0.844145	0.829421	0.782217	0.739773	NA	NA
cg24839608	-0.696659	-0.882179	-0.288434	-0.408225	-0.593745	0.18552	-0.469614	11.1156	9.39064e-05	0.0660653	0.351672	0.362163	0.502279	0.495001	NA	NA
cg01730970	0.914502	0.733286	0.441868	0.472634	0.291419	0.181215	1.70676	11.1118	9.41239e-05	0.066109	0.812842	0.769935	0.721958	0.65617	NA	NA
cg25018049	-1.56059	-0.466893	-0.553935	-1.00665	0.0870416	-1.09369	-0.659944	11.1099	9.42302e-05	0.066109	0.3353	0.367793	0.392777	0.645701	p	CSRP1
cg11487759	-1.36303	-0.646348	0.0530438	-1.41607	-0.699392	-0.71668	1.06338	11.1098	9.42401e-05	0.066109	0.614927	0.550287	0.706827	0.808835	NA	NA
cg09357628	-1.1482	0.123419	0.352388	-1.50059	-0.228969	-1.27162	1.24223	11.1065	9.44274e-05	0.0661768	0.698513	0.625989	0.697598	0.798608	p5	ATL3
cg06842637	0.497204	-0.0800832	-0.91801	1.41521	0.837926	0.577287	-2.02808	11.1021	9.46781e-05	0.0662503	0.189463	0.300465	0.204286	0.144033	NA	NA
cg08665528	-1.32075	-0.503447	-0.922607	-0.398142	0.41916	-0.817302	1.8479	11.1015	9.47137e-05	0.0662503	0.7152	0.846239	0.778615	0.8481	NA	NA
cg01719405	0.881936	0.848047	-0.145365	1.0273	0.993412	0.0338884	1.07607	11.0999	9.48046e-05	0.0662504	0.733818	0.744109	0.607064	0.555923	NA	NA
cg00880833	-1.39364	-0.616198	-0.503597	-0.890048	-0.112601	-0.777446	-0.250637	11.0974	9.49503e-05	0.0662618	0.391056	0.447052	0.470533	0.67889	NA	NA
cg02235659	-0.974093	-0.377885	0.211938	-1.18603	-0.589823	-0.596209	-0.979958	11.0957	9.50482e-05	0.0662618	0.300717	0.280544	0.36707	0.46816	NA	NA
cg07486252	-1.5882	-0.446132	-0.203482	-1.38472	-0.24265	-1.14207	0.182221	11.0937	9.51633e-05	0.0662618	0.472078	0.483934	0.536867	0.760378	p11	ANK2
cg10273615	-1.65362	-0.447113	-0.066902	-1.58672	-0.380211	-1.2065	1.30319	11.0909	9.53275e-05	0.0662618	0.640513	0.701967	0.730525	0.840171	NA	NA
cg10866548	-1.53614	-0.478304	-0.182334	-1.35381	-0.29597	-1.05784	-0.418614	11.0905	9.53527e-05	0.0662618	0.375965	0.355383	0.457596	0.638681	NA	NA
cg27608102	-1.01242	-0.425541	0.290328	-1.30275	-0.715869	-0.586883	0.229585	11.0901	9.53742e-05	0.0662618	0.503186	0.455998	0.57105	0.672399	p2	KRT19
cg18879014	-1.17345	-0.277046	-0.360378	-0.81307	0.0833317	-0.896401	0.631266	11.0887	9.5456e-05	0.0662618	0.559197	0.635284	0.607449	0.727454	NA	NA
cg01679611	1.81419	0.254864	-0.341909	2.1561	0.596773	1.55932	0.708289	11.0856	9.5638e-05	0.0663039	0.667733	0.66743	0.610093	0.347714	NA	NA
cg07282153	-1.36079	-0.821305	-0.674507	-0.686284	-0.146799	-0.539485	0.224207	11.0845	9.56982e-05	0.0663039	0.455954	12:57:43.028000	0.577852	0.68305	NA	NA
cg13416893	-1.39297	0.0771416	-0.023836	-1.36913	0.100978	-1.47011	1.91043	11.0751	9.62489e-05	0.0666188	0.748066	0.708738	0.761036	0.882372	NA	NA
cg00529256	-1.74251	0.565528	0.074061	-1.81657	0.491467	-2.30804	-2.66375	11.073	9.63699e-05	0.0666188	0.156627	0.13116	0.11052	0.318704	p1	SEMA3E
cg06105555	0.891921	0.676279	0.0607831	0.831138	0.615496	0.215642	2.20224	11.0721	9.64264e-05	0.0666188	0.851843	0.846115	0.784222	0.72274	NA	NA
cg13025542	-0.848272	-0.559423	0.334836	-1.18311	-0.894259	-0.28885	1.81775	11.0651	9.68377e-05	0.0667785	0.744255	0.691564	0.806491	0.860008	NA	NA
cg10778915	-1.12955	-0.456254	-0.0442131	-1.08534	-0.412041	-0.673296	0.0611962	11.0641	9.68967e-05	0.0667785	0.462023	0.462666	0.534555	0.667266	NA	NA
cg00955413	-1.20864	-0.546454	-0.241859	-0.966783	-0.304596	-0.662187	0.150017	11.0635	9.69319e-05	0.0667785	0.464939	0.502035	0.550676	0.685327	NA	NA
cg15809959	1.11304	0.979405	0.512589	0.600449	0.466816	0.133633	1.21898	11.0598	9.71485e-05	0.0668646	0.76172	0.71428	0.628282	0.573137	p14	SRCIN1
cg00358895	1.4084	0.550056	0.328557	1.07984	0.221499	0.858341	1.35461	11.054	9.74954e-05	0.0670001	0.772975	0.711792	0.69197	0.543533	p1	LOC439933
cg08073834	1.38069	0.505347	0.332311	1.04838	0.173036	0.875343	2.23987	11.0528	9.75659e-05	0.0670001	0.864484	0.812868	0.796563	0.721846	NA	NA
cg15168019	1.56999	0.479189	0.407051	1.16294	0.072138	1.0908	2.27918	11.0504	9.77117e-05	0.0670001	0.86196	0.805038	0.816416	0.693272	NA	NA
cg10409297	-1.30302	-0.845552	-0.0895582	-1.21347	-0.755994	-0.457471	2.02913	11.0503	9.77123e-05	0.0670001	0.731179	0.758406	0.843273	0.87754	NA	NA
cg02690559	-1.41068	-0.589783	-0.160299	-1.25038	-0.429484	-0.820897	-0.133641	11.0473	9.78934e-05	0.0670018	0.419605	0.410739	0.522942	0.62753	NA	NA
cg04856678	1.24589	0.49975	0.67168	0.574207	-0.17193	0.746137	-0.850468	11.0472	9.78983e-05	0.0670018	0.423812	0.319981	0.353586	0.2312	NA	NA
cg03324695	1.49323	-0.231786	0.0340033	1.45923	-0.265789	1.72502	-1.15812	11.0402	9.832e-05	0.067226	0.324175	0.335161	0.345881	0.204399	NA	NA
cg10290814	-0.853355	-1.28031	-1.24961	0.396255	-0.0307003	0.426956	-1.89078	11.0387	9.841e-05	0.067226	0.147258	0.263755	0.296783	0.247498	p1	TNK1
cg05935904	1.5529	0.489704	0.353037	1.19986	0.136667	1.06319	0.517688	11.0357	9.85894e-05	0.0672493	0.653506	0.600816	0.562253	0.38896	NA	NA
cg25544461	-1.54117	-0.280618	-0.273022	-1.26814	-0.00759638	-1.26055	0.0232531	11.0351	9.86283e-05	0.0672493	0.453165	0.48249	0.502397	0.710613	NA	NA
cg21788045	-1.76214	-0.335726	0.432798	-2.19494	-0.768524	-1.42642	1.95164	11.0294	9.89705e-05	0.0673115	0.742461	0.749798	0.809483	0.838399	NA	NA
cg18736273	-1.18332	-0.323379	-0.00780769	-1.17551	-0.315571	-0.859938	2.20356	11.0286	9.90205e-05	0.0673115	0.788417	0.803184	0.828294	0.889048	NA	NA
cg27497781	-1.21761	-0.75084	-0.330004	-0.887604	-0.420836	-0.466767	-0.234883	11.0259	9.91788e-05	0.0673115	0.384148	0.405098	0.523331	0.604161	p1	CHIA
cg26521521	-1.05916	-0.137334	0.149014	-1.20818	-0.286348	-0.921828	0.508992	11.025	9.92367e-05	0.0673115	0.548547	0.574275	0.601611	0.666947	NA	NA
cg14244164	1.67109	-0.0726016	-0.175281	1.84637	0.102679	1.74369	2.3615	11.0239	9.93039e-05	0.0673115	0.831263	0.864298	0.849207	0.652173	NA	NA
cg09106984	1.68362	0.747122	0.281108	1.40251	0.466014	0.936496	3.1562	11.0232	9.93454e-05	0.0673115	0.922625	0.910179	0.875618	0.793551	p	GRM4
cg10897433	-1.12238	-0.575771	-0.269937	-0.852447	-0.305833	-0.546614	-1.55305	11.0229	9.93648e-05	0.0673115	0.214231	0.227699	0.297521	0.353269	NA	NA
cg02924309	-1.46727	-0.259318	0.0222075	-1.48948	-0.281525	-1.20796	1.28671	11.0153	9.98229e-05	0.0675592	0.657003	0.69418	0.709306	0.842167	p11	ARHGAP9
cg01869342	-1.10309	-0.558146	0.000624519	-1.10371	-0.55877	-0.544944	1.14546	11.0125	9.9995e-05	0.0675618	0.627923	0.669591	0.718051	0.783527	NA	NA
cg21995686	-1.1048	-0.450588	-0.259052	-0.845748	-0.191536	-0.654211	-1.83988	11.0075	0.000100305	0.0675618	0.184751	0.210483	0.237473	0.332311	NA	NA
cg14939821	1.24544	0.510986	0.54752	0.697919	-0.0365344	0.734454	0.690394	11.0072	0.000100318	0.0675618	0.70077	0.543155	0.580935	0.493144	p,p	DOCK1,FAM196A
cg21263609	-1.27394	-0.326032	-0.117885	-1.15606	-0.208147	-0.947909	0.334229	11.0057	0.000100415	0.0675618	0.500337	0.524722	0.574237	0.722693	NA	NA
cg06863289	-1.19008	-0.626497	-0.8977	-0.292384	0.271202	-0.563587	0.562201	11.0057	0.000100415	0.0675618	0.527336	0.60327	0.605366	0.755088	NA	NA
cg21772826	-1.50277	-0.294738	-0.0769626	-1.4258	-0.217776	-1.20803	0.237991	11.0051	0.000100449	0.0675618	0.498438	0.478992	0.549793	0.727448	NA	NA
cg08664568	-1.44258	-0.520872	-0.353466	-1.08911	-0.167405	-0.921705	-0.683828	11.0033	0.000100558	0.0675618	0.320208	0.366389	0.41428	0.573395	NA	NA
cg11305940	1.00557	-0.264599	-0.262546	1.26811	-0.0020527	1.27017	1.71663	11.0032	0.000100567	0.0675618	0.763049	0.777609	0.779098	0.67108	NA	NA
cg08667177	0.93206	0.693615	-0.132918	1.06498	0.826533	0.238445	1.73353	11.0005	0.000100734	0.0675893	0.793467	0.834867	0.718777	0.668177	NA	NA
cg25845916	-1.75991	-0.362983	0.0860428	-1.84595	-0.449026	-1.39693	0.335682	10.9994	0.000100803	0.0675893	0.501964	0.458768	0.568199	0.799573	NA	NA
cg16108059	-1.24597	-0.809098	-0.230832	-1.01514	-0.578266	-0.43687	-0.210213	10.9964	0.000100988	0.0675893	0.382459	0.467117	0.520959	0.589189	p1	TSHR
cg09745322	-1.56394	-0.418457	-0.220996	-1.34295	-0.197461	-1.14548	-0.682092	10.9955	0.000101043	0.0675893	0.332635	0.356014	0.406286	0.576697	NA	NA
cg16408593	-1.4663	-0.454143	0.168428	-1.63473	-0.62257	-1.01216	0.743507	10.995	0.000101071	0.0675893	0.571432	0.536533	0.646317	0.800617	p1	VTCN1
cg19927540	-1.34597	-0.893127	-0.356085	-0.98988	-0.537042	-0.452838	-1.03327	10.9927	0.000101217	0.0676235	0.266143	0.262169	0.391681	0.491823	NA	NA
cg25603883	-1.29869	-0.654698	-0.165141	-1.13354	-0.489557	-0.643988	0.0270165	10.9908	0.00010133	0.0676235	0.443907	0.44813	0.537175	0.692253	NA	NA
cg02854228	0.862878	0.372401	-0.289545	1.15242	0.661945	0.490477	2.47995	10.9875	0.000101535	0.0676235	0.866101	0.876455	0.830348	0.771419	NA	NA
cg22384700	-1.19657	-0.725886	-0.053141	-1.14343	-0.672745	-0.470686	-0.972424	10.9875	0.000101535	0.0676235	0.285633	0.302906	0.388232	0.455258	p1	EFCAB12
cg07583848	1.04334	0.314228	0.706503	0.336837	-0.392275	0.729112	1.18828	10.9865	0.000101596	0.0676235	0.724828	0.6613	0.701076	0.538855	NA	NA
cg19450046	-1.55272	-0.622491	0.0154751	-1.56819	-0.637966	-0.930228	1.77828	10.9851	0.000101689	0.0676235	0.708168	0.736798	0.794334	0.887907	p	AIRE
cg22768222	1.52281	0.431789	0.0922071	1.43061	0.339581	1.09103	0.729794	10.9837	0.00010177	0.0676235	0.676803	0.652247	0.59431	0.448584	NA	NA
cg06118478	-1.09858	-0.59402	-0.22623	-0.872348	-0.36779	-0.504558	-0.464436	10.9791	0.000102059	0.0676459	0.370729	0.371131	0.453469	0.578483	NA	NA
cg02184632	0.0854195	0.657488	-0.417111	0.50253	1.0746	-0.572069	0.0931359	10.9782	0.000102115	0.0676459	0.57763	0.536592	0.449932	0.479031	NA	NA
cg14107061	-1.10373	-0.594594	-0.970703	-0.133026	0.376108	-0.509134	-0.0352713	10.9774	0.000102164	0.0676459	0.42832	0.552315	0.497639	0.646445	NA	NA
cg16130443	-1.51547	-0.338722	-0.0534746	-1.46199	-0.285248	-1.17675	0.98561	10.9773	0.000102174	0.0676459	0.61017	0.578425	0.675451	0.807516	NA	NA
cg08216304	-1.36681	-0.742654	-0.689802	-0.67701	-0.0528519	-0.624158	-0.19775	10.9744	0.000102355	0.067704	0.39529	0.442294	0.502898	0.642873	NA	NA
cg04250847	-0.828735	-0.0141077	0.992657	-1.82139	-1.00676	-0.814627	-2.40526	10.9692	0.000102679	0.067857	0.154327	0.120058	0.174473	0.246912	p3	PPFIA2
cg22588023	-1.00584	-0.685431	-0.370841	-0.634998	-0.31459	-0.320408	-0.342156	10.9631	0.000103062	0.068042	0.36856	0.428927	0.501236	0.534262	p1	IL22RA1
cg02158065	-1.20825	-0.437418	-0.0427357	-1.16551	-0.394683	-0.77083	1.80811	10.9594	0.000103301	0.068042	0.737507	0.742583	0.792127	0.871881	p3	SH2D3C
cg11399527	-1.20255	0.128872	0.536008	-1.73856	-0.407136	-1.33142	-3.55895	10.9592	0.000103312	0.068042	0.0763524	0.0661262	0.0791343	0.135831	p1	PDP2
cg12955583	-0.914647	-0.502203	0.623007	-1.53765	-1.12521	-0.412444	-3.34041	10.9589	0.000103332	0.068042	0.0762742	0.0734093	0.117644	0.14834	p1	KNDC1
cg01118295	-1.50389	-0.252378	-0.164962	-1.33893	-0.0874158	-1.25151	1.28815	10.9437	0.000104299	0.0684688	0.666125	0.696584	0.698812	0.825566	NA	NA
cg17416793	-1.6719	-0.46445	-0.366295	-1.30561	-0.0981541	-1.20745	-1.2446	10.9409	0.000104478	0.0684688	0.249237	0.296884	0.30566	0.532384	NA	NA
cg06523948	-1.53306	-0.150659	-0.0791268	-1.45394	-0.0715323	-1.3824	0.426692	10.9377	0.000104681	0.0684688	0.539104	0.506055	0.564786	0.774983	NA	NA
cg08662801	-1.3999	-0.403604	-0.346323	-1.05358	-0.057281	-0.996298	0.113376	10.9372	0.000104711	0.0684688	0.462439	0.524194	0.535492	0.665005	NA	NA
cg15200418	-1.20649	-0.746813	-0.230432	-0.976058	-0.516382	-0.459676	-0.0341813	10.9363	0.000104775	0.0684688	0.425939	0.422291	0.547108	0.652885	NA	NA
cg02506694	-1.24182	-0.0883729	-0.242792	-0.999023	0.154419	-1.15344	0.20408	10.9362	0.00010478	0.0684688	0.499395	0.5612	0.525776	0.656492	NA	NA
cg10711303	0.435255	0.728855	0.78876	-0.353504	-0.0599042	-0.2936	2.81096	10.9348	0.000104871	0.0684688	0.90027	0.845094	0.852681	0.866839	p20	ATP1A2
cg25307097	1.657	0.182725	0.0757289	1.58127	0.106996	1.47428	-0.0387851	10.9342	0.000104906	0.0684688	0.561622	0.453306	0.494114	0.307541	NA	NA
cg11644370	-1.27172	-0.700595	-0.433698	-0.838026	-0.266897	-0.571129	0.532729	10.9336	0.000104946	0.0684688	0.516431	0.555143	0.63167	0.732968	p2	LLGL2
cg06661720	-1.26038	-0.106647	0.481502	-1.74188	-0.588149	-1.15374	1.47844	10.9336	0.000104947	0.0684688	0.718712	0.641555	0.724994	0.858105	NA	NA
cg11875085	1.46012	0.510983	1.15349	0.306634	-0.642502	0.949137	-1.32897	10.9326	0.000105011	0.0684688	0.362978	0.20159	0.299286	0.187318	p2	LRRC14
cg02833588	-0.982455	-0.64844	-0.0346439	-0.947811	-0.613796	-0.334016	0.276493	10.9309	0.000105123	0.0684805	0.492509	0.448017	0.579171	0.73878	NA	NA
cg08895618	-1.40306	-0.4032	-0.0432809	-1.35978	-0.359919	-0.99986	-0.465985	10.9269	0.000105379	0.0685611	0.373783	0.34582	0.439961	0.638886	NA	NA
cg08612271	-1.38412	-0.378175	-0.114477	-1.26965	-0.263698	-1.00595	0.139975	10.9221	0.000105692	0.0685611	0.461009	0.497975	0.541785	0.713636	NA	NA
cg05624422	-1.45523	-0.6319	0.252458	-1.70768	-0.884359	-0.823325	0.413842	10.92	0.000105826	0.0685611	0.512508	0.475837	0.610116	0.742271	NA	NA
cg21568193	-1.41304	-0.30358	0.228664	-1.64171	-0.532243	-1.10946	0.193433	10.9195	0.00010586	0.0685611	0.489882	0.471648	0.533373	0.748939	NA	NA
cg04232282	-1.13504	-0.672435	-0.543773	-0.591264	-0.128662	-0.462602	0.130136	10.9185	0.000105921	0.0685611	0.444742	0.514942	0.566577	0.654833	NA	NA
cg08281696	-1.06344	-0.681792	-0.222556	-0.840881	-0.459236	-0.381645	-2.1531	10.9184	0.000105932	0.0685611	0.152338	0.152936	0.213912	0.296246	NA	NA
cg09061047	-1.35251	-0.521483	-0.520788	-0.831726	-0.000694724	-0.831031	1.59415	10.915	0.000106148	0.0685611	0.67712	0.782508	0.750869	0.860211	NA	NA
cg18729345	-1.2427	-0.507005	0.0133156	-1.25602	-0.52032	-0.735698	-0.730032	10.9148	0.000106166	0.0685611	0.330663	0.30787	0.411408	0.553827	NA	NA
cg23321751	-1.41208	-0.38108	-0.622193	-0.789884	0.241114	-1.031	-0.0319998	10.912	0.000106349	0.0685611	0.420877	0.533458	0.510095	0.656376	NA	NA
cg12950645	1.11605	0.637119	0.19856	0.917485	0.438559	0.478926	1.4368	10.9119	0.000106352	0.0685611	0.783255	0.73294	0.694212	0.594145	NA	NA
cg13748382	1.21008	0.00426275	-0.630888	1.84097	0.635151	1.20582	1.95454	10.911	0.000106412	0.0685611	0.785491	0.870897	0.793588	0.633435	NA	NA
cg16568442	-1.90004	-0.529401	-0.102542	-1.7975	-0.426859	-1.37064	0.146759	10.9099	0.000106483	0.0685611	0.449333	0.489911	0.55608	0.728869	NA	NA
cg13059335	0.984302	0.578196	0.16845	0.815851	0.409746	0.406106	2.96172	10.9087	0.000106561	0.0685611	0.907706	0.891617	0.864544	0.836065	p1	ADAMDEC1
cg03997393	1.16078	-0.30858	-0.199709	1.36048	-0.108871	1.46936	1.48913	10.9082	0.000106598	0.0685611	0.727455	0.743891	0.757777	0.630253	NA	NA
cg21861563	1.30003	0.464764	0.237285	1.06274	0.227479	0.835263	2.93516	10.9063	0.000106721	0.0685611	0.906338	0.881255	0.872504	0.80265	NA	NA
cg04606421	-1.26302	-0.624042	-0.359129	-0.903886	-0.264913	-0.638973	-0.123333	10.9044	0.000106841	0.0685611	0.412892	0.439144	0.516416	0.650057	NA	NA
cg09470638	-1.3208	-0.36969	-0.0672041	-1.2536	-0.302486	-0.951111	0.425607	10.904	0.00010687	0.0685611	0.523173	0.546857	0.587042	0.716501	p1	CCDC105
cg10811426	-1.36077	-0.0859068	-0.252225	-1.10855	0.166318	-1.27487	0.728679	10.9029	0.000106943	0.0685611	0.590888	0.613754	0.598842	0.793108	p1,p1	ENST00000421207,LOC100506795
cg12194348	1.90961	-0.17524	0.00814692	1.90146	-0.183387	2.08485	2.75592	10.9002	0.000107123	0.0685611	0.887392	0.828371	0.875477	0.720824	NA	NA
cg24449453	1.14048	-0.190303	-0.451217	1.5917	0.260914	1.33078	2.41929	10.9001	0.000107124	0.0685611	0.841267	0.873849	0.849391	0.738817	NA	NA
cg09841488	-0.283369	-1.29716	-1.33265	1.04928	0.035492	1.01379	-2.83386	10.8916	0.000107688	0.0687931	0.0982581	0.19536	0.208582	0.153164	p1	GLRA3
cg09156426	-0.977135	-0.683212	-0.472865	-0.50427	-0.210347	-0.293923	-1.28019	10.8912	0.000107715	0.0687931	0.239841	0.268428	0.341186	0.395194	NA	NA
cg15609679	-1.43236	-0.554603	-0.491995	-0.940369	-0.062608	-0.877761	0.786386	10.8881	0.000107923	0.0687931	0.569163	0.622561	0.644284	0.790435	NA	NA
cg10351808	1.87178	0.144955	0.00948547	1.8623	0.135469	1.72683	-0.0648414	10.887	0.000107992	0.0687931	0.516381	0.548503	0.508511	0.286043	p	FXYD1
cg12453188	-1.40592	-0.505195	-0.334087	-1.07184	-0.171109	-0.900727	-0.911594	10.885	0.000108125	0.0687931	0.29393	0.311114	0.373903	0.545438	NA	NA
cg07721569	-1.72707	-0.54794	-0.401156	-1.32591	-0.146784	-1.17913	-2.00711	10.8844	0.000108165	0.0687931	0.166546	0.197569	0.201744	0.425422	p18	TFAP2A
cg17142787	1.30933	0.364685	0.102509	1.20683	0.262177	0.944649	1.41967	10.8835	0.000108226	0.0687931	0.765595	0.740875	0.714066	0.566234	NA	NA
cg16252308	-0.409584	-0.770841	-0.58858	0.178996	-0.182261	0.361256	1.88905	10.8819	0.000108329	0.0687931	0.744193	0.775434	0.811568	0.815116	NA	NA
cg13476072	-0.918821	-0.837424	-0.328283	-0.590539	-0.509142	-0.0813967	-1.34588	10.8808	0.000108406	0.0687931	0.23084	0.250003	0.341783	0.383346	p4	MTMR11
cg08203284	-1.14574	-0.336251	0.0945283	-1.24027	-0.43078	-0.80949	2.97448	10.8798	0.000108474	0.0687931	0.862986	0.87767	0.893276	0.929693	NA	NA
cg07108768	-1.41845	-0.557745	-0.201496	-1.21695	-0.356249	-0.860704	0.96009	10.879	0.000108523	0.0687931	0.589378	0.607995	0.682086	0.823569	NA	NA
cg08546476	-1.28487	-0.311141	0.01535	-1.30022	-0.326491	-0.973725	-1.10949	10.877	0.000108662	0.0688116	0.297682	0.252033	0.33505	0.486497	NA	NA
cg12230040	-1.7245	-0.490622	-0.537959	-1.18654	0.0473375	-1.23388	1.23965	10.875	0.000108792	0.0688116	0.626397	0.698953	0.689426	0.860724	NA	NA
cg02154448	-0.977266	-0.647849	0.331376	-1.30864	-0.979226	-0.329417	2.22059	10.8741	0.000108853	0.0688116	0.77152	0.778726	0.848885	0.875753	NA	NA
cg14615446	-0.600223	-0.795891	-0.2437	-0.356523	-0.552191	0.195668	0.676129	10.873	0.000108929	0.0688116	0.540481	0.581667	0.673639	0.69277	NA	NA
cg25777748	1.36481	0.273228	-0.055258	1.42007	0.328486	1.09158	1.5575	10.8675	0.000109295	0.068941	0.774314	0.767369	0.729579	0.608988	NA	NA
cg02184281	-1.4119	0.089745	0.166774	-1.57867	-0.077029	-1.50164	2.4008	10.8671	0.000109323	0.068941	0.826345	0.834611	0.825204	0.901146	NA	NA
cg12639453	-1.20345	-0.494701	0.0632307	-1.26668	-0.557932	-0.708751	-0.415218	10.8646	0.000109492	0.068988	0.377981	0.367936	0.471017	0.577833	NA	NA
cg16169373	-0.494371	-0.10787	1.22544	-1.71981	-1.33331	-0.386501	-4.27789	10.8605	0.00010977	0.0690161	0.051653	0.0290614	0.058568	0.0640639	p1	CSPP1
cg11973177	-1.68174	-0.0296225	0.0495144	-1.73125	-0.0791368	-1.65211	-2.62742	10.8602	0.000109788	0.0690161	0.132519	0.131661	0.137144	0.291363	p1	VIM
cg13399773	-1.08941	-0.56639	-0.430925	-0.658482	-0.135465	-0.523017	0.404771	10.8588	0.000109884	0.0690161	0.508269	0.55111	0.573563	0.766602	p28	EPB41L1
cg07921586	-1.23139	-0.953744	-0.738157	-0.493229	-0.215588	-0.277641	-0.545458	10.8583	0.000109914	0.0690161	0.334201	0.394846	0.460283	0.565161	NA	NA
cg05050592	-1.25294	0.1243	0.539432	-1.79237	-0.415132	-1.37724	0.743592	10.8504	0.000110452	0.0692725	0.608055	0.57171	0.6102	0.751914	NA	NA
cg07619832	1.15776	0.332034	0.343755	0.814007	-0.011721	0.825728	1.03576	10.847	0.000110686	0.0692725	0.713857	0.644672	0.664804	0.529009	NA	NA
cg10806543	1.65732	0.175066	0.0696588	1.58766	0.105408	1.48225	0.0400797	10.846	0.000110757	0.0692725	0.53924	0.542209	0.515543	0.314757	p1,p1,p1	LOC101927560,LOC101927587,MIR548AP
cg22929787	-0.999829	-0.555406	-0.035622	-0.964207	-0.519784	-0.444423	-0.79763	10.8454	0.000110797	0.0692725	0.322701	0.313868	0.393854	0.522773	NA	NA
cg15989208	-0.908681	-0.579237	0.194209	-1.10289	-0.773446	-0.329444	-0.527303	10.8428	0.00011097	0.0692725	0.355102	0.384066	0.455935	0.509779	NA	NA
cg12982543	-1.36592	-0.433294	-0.0629473	-1.30297	-0.370347	-0.932625	1.33984	10.842	0.000111028	0.0692725	0.662329	0.656264	0.723043	0.869845	p3	CLDN16
cg16599817	-0.874124	-0.360085	0.0818001	-0.955924	-0.441885	-0.514039	0.307564	10.8418	0.000111039	0.0692725	0.501828	0.530416	0.580679	0.665517	p4	PRKCZ
cg07172701	-1.41735	-0.578465	-0.107057	-1.31029	-0.471407	-0.838885	0.787478	10.8411	0.000111088	0.0692725	0.57501	0.518224	0.633122	0.860203	NA	NA
cg10323573	-1.3412	-0.312477	-0.434063	-0.907138	0.121586	-1.02872	1.27297	10.8394	0.000111205	0.0692725	0.645076	0.758417	0.70681	0.805817	NA	NA
cg24874003	-1.51028	-0.55589	-0.229715	-1.28057	-0.326175	-0.954394	0.558305	10.8371	0.000111361	0.0692725	0.537497	0.540347	0.613685	0.757458	NA	NA
cg23145336	-1.05324	-0.624621	-0.230658	-0.82258	-0.393964	-0.428617	-0.491651	10.837	0.000111366	0.0692725	0.349166	0.386108	0.464594	0.55324	NA	NA
cg18344468	1.03463	0.765817	0.201703	0.832927	0.564115	0.268812	1.60575	10.8328	0.000111659	0.0693483	0.800649	0.772325	0.710132	0.620141	NA	NA
cg02215430	-1.33137	-0.331999	0.0912879	-1.42266	-0.423287	-0.999375	-0.24496	10.8306	0.000111811	0.0693483	0.412534	0.382383	0.479282	0.656655	NA	NA
cg01249670	-0.905249	-0.796708	-0.459728	-0.445521	-0.33698	-0.10854	-0.430904	10.8301	0.000111844	0.0693483	0.352827	0.43509	0.478095	0.541665	NA	NA
cg27465836	-1.56535	-0.0583622	0.0794928	-1.64484	-0.137855	-1.50698	-0.90593	10.8287	0.00011194	0.0693483	0.324069	0.285481	0.343251	0.578963	p	DOCK4
cg26720543	0.995567	0.388558	0.0536302	0.941937	0.334928	0.60701	0.014561	10.8284	0.000111963	0.0693483	0.530099	0.568754	0.488424	0.37026	p	INPP5D
cg21970554	-2.50611	-0.675162	-0.202662	-2.30345	-0.472501	-1.83095	-1.80807	10.8268	0.000112071	0.0693565	0.165863	0.217169	0.260312	0.503237	NA	NA
cg00008033	-1.28337	-0.0721092	0.0794919	-1.36286	-0.151601	-1.21126	-2.52957	10.8232	0.000112322	0.069357	0.136822	0.130569	0.144361	0.26196	NA	NA
cg12485783	-1.17012	-0.222247	0.171337	-1.34146	-0.393583	-0.947872	0.422823	10.8229	0.000112341	0.069357	0.540951	0.520505	0.580368	0.713142	NA	NA
cg09291824	-1.43775	-0.21321	-0.342464	-1.09528	0.129254	-1.22454	0.769519	10.8227	0.000112357	0.069357	0.579513	0.639243	0.635083	0.743568	NA	NA
cg10644206	-0.98277	-0.50138	-0.328527	-0.654244	-0.172853	-0.481391	0.0817598	10.8161	0.000112815	0.0695809	0.467065	0.466231	0.543945	0.648953	NA	NA
cg25222014	-1.99271	-0.0362663	0.165608	-2.15832	-0.201874	-1.95645	-2.16301	10.812	0.000113102	0.0696992	0.165539	0.199394	0.182268	0.364977	p2	C10orf88
cg27039074	-1.15231	-0.81868	-0.442734	-0.709571	-0.375946	-0.333625	-0.856426	10.8076	0.000113406	0.0697922	0.29158	0.310923	0.410198	0.516614	NA	NA
cg08865760	-1.04419	-0.727139	-0.468302	-0.575892	-0.258837	-0.317056	-0.595901	10.8069	0.000113459	0.0697922	0.328537	0.385722	0.44908	0.535243	NA	NA
cg24129193	-0.818837	-0.730934	-0.350987	-0.467849	-0.379946	-0.087903	1.1651	10.8057	0.00011354	0.0697922	0.619634	0.712861	0.730837	0.749826	NA	NA
cg03817685	-1.04849	-0.534986	-0.201221	-0.847265	-0.333765	-0.513499	-0.518827	10.8036	0.000113688	0.0698052	0.349121	0.39209	0.460053	0.525374	NA	NA
cg20729171	-1.738	-0.649455	-0.22955	-1.50845	-0.419905	-1.08855	-2.36337	10.8022	0.000113785	0.0698052	0.143346	0.138267	0.204532	0.30425	NA	NA
cg11732673	-1.02452	-0.822928	-0.462261	-0.562263	-0.360667	-0.201596	-0.00706919	10.8004	0.000113912	0.0698052	0.411325	0.495637	0.558444	0.613896	NA	NA
cg14241836	1.46861	0.60736	1.06839	0.400215	-0.461034	0.861249	0.736007	10.8	0.000113943	0.0698052	0.705337	0.522009	0.594902	0.496524	NA	NA
cg07985746	-0.61374	-0.805398	-1.0237	0.409956	0.218299	0.191658	1.0308	10.7984	0.000114057	0.0698163	0.61339	0.672523	0.700059	0.7301	NA	NA
cg08287903	1.32388	0.63854	-0.11205	1.43593	0.75059	0.685338	1.44745	10.7968	0.000114168	0.0698259	0.773767	0.77991	0.681325	0.585897	NA	NA
cg07956876	1.18663	-0.313112	-0.384093	1.57072	0.0709807	1.49974	1.3728	10.7935	0.000114398	0.0698965	0.728084	0.730336	0.740391	0.566074	NA	NA
cg05095390	-1.11673	-0.760958	-0.38289	-0.733843	-0.378068	-0.355775	0.18803	10.7924	0.000114475	0.0698965	0.457229	0.484891	0.562051	0.743601	NA	NA
cg08194377	-1.27048	-0.435047	-0.296843	-0.973634	-0.138203	-0.835431	-0.266663	10.7845	0.000115035	0.0700116	0.382611	0.461233	0.480436	0.62931	p	ANKS1A
cg26065909	-0.870842	-0.851686	-0.237858	-0.632983	-0.613828	-0.0191557	-0.414568	10.7842	0.000115061	0.0700116	0.364923	0.357813	0.496747	0.552913	p1	SELENBP1
cg11380327	-1.44601	-0.257936	-0.096857	-1.34915	-0.161079	-1.18807	-1.29834	10.784	0.000115073	0.0700116	0.260699	0.247208	0.291294	0.498664	NA	NA
cg03763300	1.44268	0.129377	-0.125111	1.56779	0.254488	1.3133	1.90129	10.7832	0.000115132	0.0700116	0.819136	0.778441	0.782326	0.626745	NA	NA
cg03489660	-1.25919	-0.666313	-0.377928	-0.881262	-0.288385	-0.592877	0.110034	10.783	0.000115143	0.0700116	0.449652	0.497008	0.55063	0.690892	NA	NA
cg16572966	1.41377	0.351061	0.260167	1.1536	0.0908941	1.06271	2.82369	10.7793	0.000115408	0.0701143	0.897023	0.881047	0.868649	0.758818	NA	NA
cg25419523	-1.16643	-0.468945	0.473865	-1.6403	-0.94281	-0.697487	0.985773	10.7766	0.0001156	0.0701726	0.608459	0.593973	0.675407	0.824996	p9	FAM65B
cg01090659	1.2101	0.169127	-0.47475	1.68485	0.643878	1.04097	0.0982396	10.775	0.000115719	0.0701868	0.555277	0.581863	0.505767	0.326427	NA	NA
cg06503422	-1.20504	-0.647645	-0.294306	-0.910738	-0.353339	-0.557399	-0.162945	10.7717	0.00011595	0.0702683	0.40353	0.425107	0.513622	0.65239	NA	NA
cg24488891	-0.688774	-0.83886	-0.971047	0.282273	0.132187	0.150086	-0.586226	10.7673	0.000116271	0.0704046	0.330901	0.46222	0.449738	0.455354	p2	GPR158
cg23630423	-1.44722	-0.665974	-0.249074	-1.19814	-0.4169	-0.781244	-0.695692	10.7652	0.000116422	0.070435	0.321034	0.347413	0.416052	0.57389	NA	NA
cg14494108	0.584521	-0.322464	-0.929755	1.51428	0.60729	0.906985	1.6031	10.7632	0.000116565	0.070435	0.726781	0.830422	0.75075	0.697202	NA	NA
cg15741156	-1.21383	-0.467617	0.628727	-1.84256	-1.09634	-0.746218	1.73731	10.7625	0.000116611	0.070435	0.729632	0.647328	0.776488	0.891116	NA	NA
cg09100373	1.40359	0.400527	0.531928	0.871664	-0.131401	1.00306	2.43721	10.7563	0.000117066	0.0705884	0.873091	0.830501	0.830377	0.739741	NA	NA
cg19650115	-0.831314	-0.659802	-0.218719	-0.612595	-0.441082	-0.171512	-2.88871	10.7556	0.000117112	0.0705884	0.0991156	0.106038	0.143283	0.163013	p1	CREB5
cg01708377	-1.09926	-0.455636	0.119086	-1.21834	-0.574721	-0.643622	-0.551389	10.7547	0.000117181	0.0705884	0.354734	0.339179	0.449863	0.556931	NA	NA
cg20632978	-1.36333	-0.533526	-0.476772	-0.886562	-0.0567545	-0.829807	2.71802	10.7537	0.000117251	0.0705884	0.828296	0.867064	0.876776	0.917813	p4	AZI1
cg13680196	1.81776	0.504099	0.504408	1.31336	-0.00030866	1.31366	-0.0398803	10.7503	0.0001175	0.0706188	0.575738	0.44988	0.479257	0.305292	NA	NA
cg05574995	-1.10946	-0.450422	0.240719	-1.35018	-0.691141	-0.659037	0.374596	10.7496	0.000117552	0.0706188	0.51912	0.471291	0.594128	0.730066	NA	NA
cg26515358	1.19789	0.410981	0.0727693	1.12512	0.338212	0.786907	-0.527131	10.749	0.000117592	0.0706188	0.49509	0.373924	0.376106	0.309874	NA	NA
cg25745119	0.923945	0.63882	0.282724	0.641221	0.356096	0.285125	2.89474	10.7467	0.000117764	0.0706639	0.902921	0.884935	0.856956	0.841845	NA	NA
cg07418291	-1.08294	-0.418957	-0.0254525	-1.05749	-0.393504	-0.663983	0.0457396	10.739	0.000118321	0.07094	0.467111	0.453882	0.519558	0.682419	NA	NA
cg20109410	1.15367	-0.235811	0.124405	1.02926	-0.360216	1.38948	2.0571	10.7357	0.000118563	0.0710269	0.814306	0.778775	0.821287	0.695462	NA	NA
cg14818794	-1.17915	-0.777203	-0.606326	-0.57282	-0.170877	-0.401943	-0.246429	10.7297	0.00011901	0.071236	0.37557	0.463113	0.507426	0.60189	p	LINC01119
cg12756081	-1.09367	-0.37889	-0.308379	-0.78529	-0.070511	-0.714779	0.496793	10.7276	0.000119166	0.07125	0.531661	0.576435	0.593558	0.733407	NA	NA
cg15343100	-0.545678	-0.816641	-0.345126	-0.200552	-0.471515	0.270964	-0.598587	10.7267	0.000119229	0.07125	0.338211	0.37642	0.457658	0.468416	NA	NA
cg25400253	1.11103	0.101822	-0.437721	1.54875	0.539543	1.00921	0.192032	10.7225	0.000119536	0.0713386	0.555138	0.5866	0.528518	0.384753	p1	ITGA2B
cg11011354	-1.06216	-0.43068	-0.0257323	-1.03643	-0.404948	-0.63148	-1.27849	10.7221	0.000119572	0.0713386	0.256786	0.252132	0.321588	0.407228	NA	NA
cg05582016	-1.3087	-0.0903432	0.0765871	-1.38529	-0.16693	-1.21836	0.679771	10.72	0.000119728	0.0713503	0.584889	0.556333	0.614619	0.768788	NA	NA
cg25417766	-1.43474	-0.761836	-0.499264	-0.935479	-0.262572	-0.672906	-1.31787	10.7179	0.000119881	0.0713503	0.222915	0.288215	0.333027	0.419085	NA	NA
cg12347344	-1.39494	0.156426	-0.283571	-1.11136	0.439997	-1.55136	2.02046	10.7146	0.000120126	0.0713503	0.781085	0.817116	0.770995	0.899658	NA	NA
cg09783609	-1.32792	-0.523417	-0.409678	-0.918244	-0.113739	-0.804505	-0.661792	10.7146	0.000120128	0.0713503	0.327551	0.38007	0.415475	0.554287	NA	NA
cg00020052	-1.49875	-0.308064	-0.315636	-1.18312	0.00757228	-1.19069	-2.28073	10.7144	0.000120139	0.0713503	0.151713	0.195911	0.160366	0.372	p1	CNRIP1
cg16085344	-1.17858	-0.637961	-0.394261	-0.784321	-0.243701	-0.540621	-0.445906	10.7139	0.000120178	0.0713503	0.358728	0.395859	0.46526	0.579425	NA	NA
cg07410319	-0.465783	0.654408	0.4769	-0.942683	0.177509	-1.12019	3.8095	10.7093	0.000120523	0.0714483	0.937082	0.933415	0.916156	0.949868	NA	NA
cg22932220	1.32433	0.297539	-0.0167105	1.34104	0.314249	1.02679	-1.55687	10.7091	0.000120539	0.0714483	0.308946	0.28443	0.248357	0.153511	NA	NA
cg25456571	1.29037	0.624809	0.639752	0.650617	-0.0149427	0.665559	1.82669	10.7013	0.000121123	0.071624	0.819336	0.776004	0.759949	0.648486	NA	NA
cg16216212	0.767194	0.747353	0.835527	-0.0683329	-0.088174	0.019841	2.58788	10.7009	0.000121151	0.071624	0.884024	0.835844	0.839153	0.802262	NA	NA
cg01089538	1.54466	-0.0741887	-0.415841	1.9605	0.341653	1.61885	0.781026	10.699	0.000121295	0.071624	0.653369	0.677618	0.637566	0.415811	p	ST6GAL1
cg08233746	-1.19426	-0.66081	-0.367665	-0.826591	-0.293145	-0.533446	-0.504719	10.6952	0.000121585	0.071624	0.341449	0.397584	0.460719	0.579856	NA	NA
cg04147969	-0.347892	-0.917916	-0.566169	0.218277	-0.351747	0.570024	-0.215351	10.692	0.000121826	0.071624	0.401242	0.435211	0.527891	0.521857	NA	NA
cg10966354	1.17788	0.539403	0.108542	1.06934	0.430861	0.63848	1.55181	10.6906	0.000121933	0.071624	0.783907	0.76782	0.719292	0.617348	NA	NA
cg24658605	-1.30736	-0.334218	0.0778184	-1.38517	-0.412037	-0.973138	0.748704	10.6892	0.000122037	0.071624	0.58239	0.551812	0.642561	0.782198	NA	NA
cg23208557	-0.933721	-0.618313	-0.358638	-0.575083	-0.259675	-0.315408	0.0406209	10.689	0.000122054	0.071624	0.453519	0.453173	0.537155	0.671127	NA	NA
cg02042997	1.22595	0.483232	0.616084	0.60987	-0.132853	0.742722	0.684678	10.6887	0.000122074	0.071624	0.689885	0.546658	0.592804	0.48109	p1	APOB48R
cg27440979	-1.07592	-0.556949	-0.328243	-0.747682	-0.228706	-0.518975	-0.282139	10.6882	0.000122113	0.071624	0.388491	0.446817	0.484629	0.587938	NA	NA
cg11474748	-0.265708	-0.898336	-0.472467	0.206758	-0.425869	0.632627	0.369611	10.687	0.000122201	0.071624	0.505205	0.528034	0.626321	0.593992	p1	LINC00598
cg26218487	1.36037	0.0862468	-0.788034	2.1484	0.87428	1.27412	-0.33114	10.687	0.000122206	0.071624	0.477163	0.540715	0.42609	0.262522	NA	NA
cg02508438	1.27968	0.502429	0.413045	0.866639	0.0893839	0.777255	1.60062	10.6868	0.00012222	0.071624	0.794085	0.751936	0.737377	0.590896	NA	NA
cg25868831	-1.34211	-0.557841	-0.25703	-1.08508	-0.300811	-0.784267	-2.93293	10.6846	0.00012239	0.071624	0.103785	0.0892932	0.136526	0.210365	p	B4GALNT4
cg21180080	1.16567	0.0657423	-0.29907	1.46474	0.364812	1.09993	1.94018	10.6837	0.000122452	0.071624	0.80066	0.823489	0.800412	0.646379	NA	NA
cg14297797	-1.11089	-0.699681	-0.102924	-1.00796	-0.596756	-0.411205	-0.214586	10.683	0.00012251	0.071624	0.405392	0.389966	0.507174	0.639081	NA	NA
cg13980607	-1.09578	-0.906362	-0.572263	-0.523516	-0.3341	-0.189417	-0.559235	10.6825	0.000122544	0.071624	0.327803	0.382468	0.463418	0.552582	p6	P2RY14
cg14085840	-0.753747	-0.631184	-0.343098	-0.410649	-0.288086	-0.122563	-1.5331	10.6815	0.000122625	0.071624	0.210662	0.267833	0.300213	0.300692	NA	NA
cg06717222	-1.57443	-0.288319	0.312374	-1.88681	-0.600693	-1.28612	1.02959	10.6805	0.000122699	0.071624	0.638472	0.577551	0.668914	0.827334	NA	NA
cg16602295	-1.29018	-0.588573	-0.350479	-0.939699	-0.238095	-0.701605	0.0271373	10.6777	0.000122913	0.0716881	0.442968	0.459547	0.556489	0.60842	NA	NA
cg14472181	-1.051	-0.841986	-0.469763	-0.581233	-0.372224	-0.209009	-0.792986	10.6765	0.000123005	0.0716881	0.300424	0.344777	0.425416	0.482326	NA	NA
cg13497525	1.26582	0.121781	-0.0315365	1.29735	0.153317	1.14404	3.68863	10.675	0.000123119	0.0716975	0.935397	0.93455	0.92647	0.870469	NA	NA
cg15281734	1.26373	0.737902	0.554446	0.70928	0.183456	0.525824	1.01924	10.6729	0.000123278	0.071715	0.739234	0.654515	0.624888	0.523715	NA	NA
cg14555811	1.08974	0.374894	0.15381	0.93593	0.221083	0.714846	1.73814	10.6719	0.000123359	0.071715	0.810116	0.756305	0.749612	0.640594	NA	NA
cg01964795	-0.305257	1.04381	0.483557	-0.788814	0.560252	-1.34907	2.96015	10.6708	0.000123444	0.071715	0.900627	0.901828	0.827885	0.918146	NA	NA
cg05141871	-1.13247	-2.20558	-1.31094	0.17847	-0.894637	1.07311	-1.00144	10.6665	0.000123768	0.0718464	0.228489	0.362554	0.53116	0.351839	p	SSH3
cg00753646	-1.31289	-0.40924	-0.295206	-1.01768	-0.114035	-0.903646	1.76002	10.6643	0.000123943	0.071853	0.722959	0.765303	0.77191	0.864265	NA	NA
cg04317318	1.42793	0.0203948	0.174053	1.25388	-0.153658	1.40753	-1.73074	10.6638	0.000123977	0.071853	0.276753	0.189013	0.254384	0.123	NA	NA
cg08586979	0.753695	0.78691	0.782627	-0.0289314	0.00428324	-0.0332146	1.06348	10.6607	0.00012422	0.0719368	0.742868	0.642811	0.62144	0.604937	NA	NA
cg24390961	-1.26023	-0.544159	-0.13699	-1.12324	-0.407169	-0.716072	-1.64569	10.6562	0.000124568	0.0720816	0.211359	0.194439	0.27328	0.374033	p1	LINC01094
cg11678075	-1.08373	-0.537178	-0.316963	-0.766767	-0.220216	-0.546551	0.308143	10.6543	0.00012471	0.0721064	0.492175	0.516941	0.579231	0.708409	NA	NA
cg08849191	-1.33043	-0.836925	-0.432195	-0.898237	-0.40473	-0.493507	-0.875866	10.6525	0.000124855	0.0721333	0.289442	0.30305	0.416212	0.516527	NA	NA
cg14832682	-1.43841	-0.209168	-0.251019	-1.18739	0.0418506	-1.22924	1.85476	10.6501	0.000125044	0.0721412	0.74643	0.77183	0.774377	0.88045	NA	NA
cg15414028	1.04864	0.181648	0.254814	0.793824	-0.0731665	0.866991	-1.68788	10.6489	0.000125131	0.0721412	0.272641	0.214369	0.240202	0.159674	NA	NA
cg01077450	-1.22459	-0.578055	0.631476	-1.85606	-1.20953	-0.646531	0.829774	10.6485	0.000125165	0.0721412	0.595088	0.518902	0.692975	0.726266	NA	NA
cg08650919	-1.13197	-0.400547	-0.317778	-0.814196	-0.0827695	-0.731426	1.03438	10.6447	0.000125459	0.0722418	0.617954	0.675877	0.677896	0.796761	NA	NA
cg27366882	-1.1578	-0.485735	0.0360414	-1.19384	-0.521777	-0.672061	0.407289	10.6435	0.000125552	0.0722418	0.523739	0.526507	0.601621	0.657969	NA	NA
cg07800034	-1.78316	-0.294005	-0.168298	-1.61486	-0.125707	-1.48915	0.364237	10.6423	0.000125646	0.0722418	0.511934	0.481951	0.564496	0.777126	NA	NA
cg12609243	-1.15815	0.310542	-0.0231938	-1.13496	0.333736	-1.46869	-2.8424	10.6403	0.000125804	0.0722418	0.1199	0.130967	0.104715	0.224267	NA	NA
cg06192292	-1.20668	-0.88227	-0.206192	-1.00049	-0.676078	-0.324414	-1.01531	10.6395	0.000125868	0.0722418	0.267588	0.26388	0.394828	0.513277	NA	NA
cg26848982	1.42724	0.544101	0.41716	1.01008	0.126942	0.883136	1.194	10.6387	0.000125934	0.0722418	0.765978	0.631978	0.671171	0.508583	NA	NA
cg03270777	1.15465	0.437307	0.380173	0.774482	0.057134	0.717348	3.1973	10.6351	0.000126215	0.0723135	0.919979	0.900681	0.891689	0.840607	NA	NA
cg25055447	0.810331	0.91211	0.773323	0.0370081	0.138787	-0.101779	1.23899	10.6346	0.000126257	0.0723135	0.76104	0.666676	0.653769	0.614207	NA	NA
cg00688636	1.4998	0.246758	0.689265	0.810537	-0.442507	1.25304	0.50999	10.6313	0.000126511	0.0724023	0.653355	0.48847	0.606929	0.386882	NA	NA
cg05350026	-1.24665	-0.628918	-0.424642	-0.822009	-0.204276	-0.617734	0.0859486	10.6293	0.000126673	0.0724382	0.433216	0.496505	0.562294	0.659225	NA	NA
cg01451760	-1.43506	-0.482427	-0.204798	-1.23026	-0.277629	-0.95263	-0.876552	10.6267	0.000126879	0.0724921	0.310622	0.305169	0.377666	0.538672	NA	NA
cg03835941	-1.27834	-0.719633	-0.419292	-0.859046	-0.300341	-0.558705	-0.691616	10.6256	0.000126965	0.0724921	0.311557	0.374664	0.430074	0.534172	NA	NA
cg00386413	-1.41707	-0.0422238	0.182479	-1.59955	-0.224703	-1.37485	0.173269	10.6231	0.000127159	0.0725266	0.509253	0.448182	0.514698	0.726379	NA	NA
cg27020668	1.22563	0.516208	0.406294	0.81934	0.109914	0.709427	2.7256	10.6221	0.000127237	0.0725266	0.894825	0.869795	0.852106	0.771391	NA	NA
cg16905754	-0.98943	-0.68946	-0.558223	-0.431208	-0.131237	-0.29997	-0.468947	10.6197	0.000127428	0.0725266	0.35043	0.437123	0.454669	0.555523	NA	NA
cg24531534	-1.02776	-0.878575	-0.881121	-0.146642	0.00254645	-0.149189	0.190629	10.6197	0.000127432	0.0725266	0.45027	0.541059	0.594515	0.619629	NA	NA
cg10747242	1.1215	0.729174	0.163805	0.957693	0.565369	0.392324	1.35234	10.6185	0.000127522	0.0725266	0.776752	0.732143	0.662638	0.601883	NA	NA
cg24407327	-1.73118	-0.122903	-0.363126	-1.36805	0.240224	-1.60828	-2.21093	10.6154	0.000127771	0.0725657	0.150222	0.212212	0.176625	0.340925	p5	NRXN2
cg14583300	-1.24954	-0.670312	-0.461435	-0.788104	-0.208876	-0.579227	-0.679568	10.6112	0.000128109	0.0725657	0.331632	0.33476	0.421591	0.555259	NA	NA
cg02965295	-1.31817	-0.342024	-0.183587	-1.13458	-0.158437	-0.976147	0.990448	10.611	0.000128126	0.0725657	0.627955	0.633262	0.656873	0.783929	NA	NA
cg00561322	-1.16233	-0.374484	0.200114	-1.36245	-0.574598	-0.78785	-0.0203284	10.6109	0.000128133	0.0725657	0.471063	0.388873	0.52617	0.630509	NA	NA
cg00100361	0.930989	0.566082	0.217338	0.713652	0.348745	0.364907	0.884208	10.6104	0.000128175	0.0725657	0.713408	0.620147	0.595469	0.574737	NA	NA
cg20132791	-0.0499173	-0.850191	-1.61152	1.5616	0.761327	0.800274	1.68005	10.6102	0.000128187	0.0725657	0.693259	0.84932	0.784266	0.731711	p1	SLC26A8
cg16553757	-1.25903	-0.49519	-1.12328	-0.135748	0.628088	-0.763836	0.933138	10.607	0.000128441	0.072578	0.582337	0.718979	0.651038	0.764824	p	SMAD6
cg08736867	1.173	0.294526	0.0807766	1.09222	0.21375	0.87847	1.2658	10.6066	0.000128473	0.072578	0.752032	0.689322	0.685918	0.58254	NA	NA
cg01459252	-1.5675	-0.304538	-0.454951	-1.11255	0.150413	-1.26296	-0.356491	10.6062	0.000128507	0.072578	0.397576	0.418976	0.440019	0.636984	NA	NA
cg25000618	-1.37787	-0.596515	-0.146769	-1.2311	-0.449747	-0.781351	0.77078	10.602	0.000128845	0.0726795	0.568315	0.560324	0.658993	0.797657	NA	NA
cg11212594	-1.44812	-0.509356	-0.332127	-1.11599	-0.177229	-0.938766	1.1429	10.6015	0.000128886	0.0726795	0.617421	0.703038	0.707654	0.801667	NA	NA
cg22562494	-1.60987	-0.652571	-0.0981289	-1.51175	-0.554442	-0.957304	-1.96308	10.5982	0.000129152	0.0727421	0.177627	0.176891	0.247863	0.332483	NA	NA
cg05111603	-1.67423	-0.713762	-0.375328	-1.2989	-0.338433	-0.960467	-1.02077	10.5969	0.00012926	0.0727421	0.264562	0.30872	0.368034	0.551739	NA	NA
cg24515883	1.31462	0.683587	0.378001	0.936624	0.305586	0.631038	1.56869	10.5962	0.000129316	0.0727421	0.799038	0.758968	0.717905	0.569547	NA	NA
cg15347788	-1.48977	-0.513236	-0.426927	-1.06284	-0.0863083	-0.976534	1.30007	10.595	0.000129409	0.0727421	0.652939	0.684838	0.715946	0.840928	NA	NA
cg25970110	-1.25281	-0.414799	-0.162718	-1.09009	-0.252081	-0.838009	-0.279328	10.5939	0.000129495	0.0727421	0.399663	0.412154	0.474277	0.629227	NA	NA
cg11651887	-0.47909	-0.755694	-0.369619	-0.109471	-0.386075	0.276604	-0.155746	10.5925	0.000129613	0.0727523	0.408774	0.456116	0.527123	0.561978	NA	NA
cg09127440	1.248	0.619202	0.376227	0.87177	0.242975	0.628796	2.72981	10.5896	0.000129845	0.0728269	0.89494	0.874152	0.851809	0.77657	NA	NA
cg14585186	1.62551	0.699073	0.322792	1.30271	0.376281	0.926433	1.33417	10.583	0.00013038	0.0728621	0.770571	0.737492	0.667902	0.545691	NA	NA
cg14934264	-1.29435	-0.844027	-0.370471	-0.923878	-0.473556	-0.450321	-0.731327	10.5828	0.000130398	0.0728621	0.303622	0.341636	0.431218	0.548222	NA	NA
cg10468933	-1.38203	-0.315554	0.364006	-1.74603	-0.67956	-1.06648	-0.058416	10.5815	0.000130505	0.0728621	0.464192	0.385511	0.504358	0.655766	NA	NA
cg27634382	-1.47882	-0.25418	-0.304942	-1.17388	0.0507616	-1.22464	-0.175795	10.5806	0.000130574	0.0728621	0.428515	0.419029	0.4699	0.69044	NA	NA
cg23976274	1.23529	-0.244038	-0.0600401	1.29533	-0.183998	1.47933	0.913475	10.5797	0.00013065	0.0728621	0.65405	0.653826	0.681402	0.484097	NA	NA
cg12121162	1.23132	0.434344	-0.177695	1.40901	0.612038	0.796974	1.0131	10.5795	0.000130665	0.0728621	0.718592	0.695821	0.64122	0.460966	p8	UTRN
cg01439322	-1.24711	-0.115914	-0.0302638	-1.21685	-0.0856504	-1.13119	0.723809	10.5793	0.000130686	0.0728621	0.584133	0.617641	0.626955	0.731941	NA	NA
cg26477856	0.800454	0.609984	0.380693	0.419761	0.229291	0.19047	0.973164	10.579	0.000130706	0.0728621	0.710069	0.668951	0.632438	0.552163	p2	DGKA
cg17624310	-0.511473	-0.725681	-1.04211	0.530642	0.316434	0.214207	1.21544	10.5751	0.000131024	0.0729144	0.634799	0.758428	0.716	0.73939	NA	NA
cg18761015	-1.15694	-0.697054	-0.109376	-1.04757	-0.587678	-0.459887	-0.669394	10.5744	0.000131087	0.0729144	0.323523	0.337035	0.432201	0.570918	NA	NA
cg11557932	-1.3876	-0.438639	0.268716	-1.65631	-0.707355	-0.94896	1.11095	10.5704	0.000131409	0.0729144	0.625415	0.576727	0.698166	0.84633	NA	NA
cg07437977	-0.769235	-0.623532	-0.267408	-0.501826	-0.356123	-0.145703	-0.487109	10.5701	0.000131434	0.0729144	0.371188	0.356788	0.459521	0.536073	NA	NA
cg10028097	1.09021	0.823724	0.480572	0.609639	0.343153	0.266487	1.42663	10.5694	0.000131491	0.0729144	0.785382	0.737451	0.681099	0.603038	NA	NA
cg04185922	1.04932	0.182872	-0.215777	1.26509	0.398649	0.866445	1.35655	10.5693	0.000131499	0.0729144	0.74629	0.729296	0.710541	0.607582	NA	NA
cg25736198	0.918094	0.587683	0.575045	0.343049	0.0126382	0.330411	2.69516	10.5682	0.000131594	0.0729144	0.893651	0.846499	0.849708	0.803691	NA	NA
cg10193422	-1.31057	-0.266223	0.0817513	-1.39233	-0.347974	-1.04435	-0.195402	10.568	0.000131607	0.0729144	0.456459	0.332535	0.436786	0.78813	NA	NA
cg24790419	-1.14159	-0.468865	0.0192239	-1.16082	-0.488089	-0.672729	-0.215226	10.5669	0.000131699	0.0729144	0.421468	0.405254	0.490909	0.602441	NA	NA
cg04804550	-1.29289	0.114305	0.22723	-1.52012	-0.112925	-1.4072	-2.90409	10.5638	0.000131957	0.0730019	0.111636	0.101203	0.110473	0.232999	p1	IGFBPL1
cg00594282	0.506178	-0.00393575	-1.02649	1.53267	1.02255	0.510114	2.15091	10.5613	0.000132163	0.0730605	0.807777	0.886833	0.792006	0.768236	NA	NA
cg26748945	-2.03943	-0.607382	-0.646839	-1.39259	0.0394572	-1.43205	-2.81446	10.5596	0.000132303	0.0730824	0.0996125	0.142746	0.1461	0.288683	p1	THSD7A
cg03644984	1.60312	-0.140113	-0.820738	2.42386	0.680625	1.74323	3.79885	10.5566	0.000132548	0.0731627	0.935708	0.946006	0.927291	0.855081	NA	NA
cg09936919	-1.54779	-0.588449	-0.356194	-1.19159	-0.232255	-0.959338	0.914661	10.5508	0.000133034	0.0732756	0.568102	0.643577	0.670847	0.826344	NA	NA
cg15586601	-1.1486	-0.280609	-0.148683	-0.999919	-0.131927	-0.867992	1.13739	10.5499	0.00013311	0.0732756	0.65632	0.636781	0.683961	0.823927	p4	HECW1
cg03495173	-1.19855	-0.796527	-0.64632	-0.552233	-0.150207	-0.402026	-0.453468	10.5494	0.000133147	0.0732756	0.342567	0.419499	0.476608	0.564374	NA	NA
cg00405112	1.50964	0.817486	-0.161004	1.67064	0.97849	0.692154	2.29529	10.5485	0.000133227	0.0732756	0.865216	0.853198	0.786727	0.709344	NA	NA
cg23508991	-1.16942	-0.279065	-0.0935355	-1.07588	-0.18553	-0.890354	0.255069	10.5476	0.000133302	0.0732756	0.495285	0.509738	0.563506	0.689008	NA	NA
cg05511755	1.5187	0.0441234	-0.14342	1.66212	0.187544	1.47458	1.7581	10.5469	0.000133355	0.0732756	0.795195	0.791235	0.779976	0.551423	NA	NA
cg11085762	-1.04881	-1.21015	-1.45632	0.407511	0.246168	0.161342	1.53281	10.5443	0.000133572	0.0733188	0.611391	0.812314	0.786845	0.801727	p	JAK3
cg08038110	0.882151	0.654671	0.250918	0.631234	0.403754	0.22748	1.84748	10.5436	0.000133638	0.0733188	0.821237	0.796557	0.745366	0.70684	NA	NA
cg16816836	-1.34392	-0.794655	-0.317801	-1.02612	-0.476853	-0.549263	0.342523	10.5424	0.000133735	0.0733188	0.477255	0.504111	0.615326	0.710694	p2	LLGL2
cg02017798	-1.37794	-0.363141	0.459002	-1.83694	-0.822143	-1.0148	0.260578	10.5406	0.000133889	0.0733485	0.516207	0.402506	0.567448	0.735289	NA	NA
cg21162356	1.47188	0.488391	0.514392	0.957484	-0.0260005	0.983485	2.38442	10.5377	0.000134125	0.0734224	0.876224	0.810407	0.822457	0.713364	NA	NA
cg03237828	1.33462	0.206647	-0.0792744	1.4139	0.285921	1.12797	1.20824	10.5352	0.000134341	0.0734313	0.71928	0.766117	0.679427	0.514352	NA	NA
cg04216845	-1.30321	-0.197867	0.0582073	-1.36142	-0.256074	-1.10535	-1.3996	10.5345	0.000134395	0.0734313	0.255413	0.229745	0.27657	0.45405	NA	NA
cg11787891	-1.39002	-0.502546	-0.404194	-0.985822	-0.0983512	-0.887471	-0.302731	10.5317	0.000134632	0.0734313	0.403108	0.40879	0.452964	0.664121	NA	NA
cg08371556	-1.07335	-0.325912	0.17699	-1.25034	-0.502901	-0.747439	0.406619	10.5315	0.000134647	0.0734313	0.548116	0.48096	0.573638	0.728692	NA	NA
cg00912625	-1.19517	-0.427591	-1.33681	0.141633	0.909214	-0.767581	-2.32799	10.5303	0.000134754	0.0734313	0.116003	0.331127	0.189622	0.239685	NA	NA
cg09162686	-1.08203	-0.576086	-0.187787	-0.894243	-0.388299	-0.505944	0.319443	10.5293	0.000134834	0.0734313	0.489783	0.534915	0.582283	0.709354	NA	NA
cg01758637	-1.17129	-0.640626	-0.615058	-0.556235	-0.0255675	-0.530667	-0.176087	10.5292	0.000134845	0.0734313	0.400455	0.476738	0.49839	0.625282	NA	NA
cg17167920	-1.02776	-0.536404	-0.0299465	-0.997816	-0.506457	-0.491359	0.532958	10.5233	0.000135344	0.0736112	0.542293	0.512852	0.622449	0.736634	p1	NUP210L
cg05683451	-1.1232	-0.184735	0.306794	-1.42999	-0.491529	-0.938462	2.37662	10.5229	0.000135377	0.0736112	0.820981	0.782692	0.848368	0.895926	NA	NA
cg05036191	1.45658	0.191235	0.343887	1.11269	-0.152652	1.26535	2.38073	10.5195	0.000135664	0.0737122	0.851622	0.842095	0.844796	0.679169	NA	NA
cg12439852	-1.48255	-0.212008	0.200169	-1.68271	-0.412177	-1.27054	0.90088	10.516	0.000135963	0.0737738	0.608873	0.598727	0.657858	0.795979	NA	NA
cg08648606	-1.55535	-0.529084	-0.542532	-1.01282	0.0134478	-1.02627	1.06913	10.5157	0.000135993	0.0737738	0.616542	0.668103	0.692628	0.797253	NA	NA
cg21726551	0.942315	0.753101	0.413083	0.529232	0.340018	0.189214	2.00806	10.5146	0.00013608	0.0737738	0.839443	0.81	0.75847	0.732594	p	GPR133
cg24351076	1.85483	0.187334	0.329169	1.52566	-0.141835	1.66749	1.87332	10.513	0.000136222	0.0737961	0.816146	0.762758	0.790404	0.578749	p6	ITPRIPL1
cg15820273	1.51229	-0.274376	0.57338	0.938913	-0.847756	1.78667	-2.13439	10.5117	0.00013633	0.0737996	0.211116	0.157737	0.232556	0.0929141	p1	CAST
cg08277453	-1.50013	-0.50356	-0.124211	-1.37592	-0.379349	-0.996571	-0.576517	10.5085	0.000136602	0.073831	0.350716	0.346801	0.430139	0.594281	NA	NA
cg13239949	-1.00789	-0.491493	-0.138578	-0.869317	-0.352915	-0.516402	-0.316802	10.5085	0.000136609	0.073831	0.398872	0.397149	0.474182	0.606855	NA	NA
cg18790143	-1.37388	-0.28452	-0.413709	-0.960174	0.129189	-1.08936	1.12104	10.5066	0.000136765	0.073831	0.616571	0.744859	0.679083	0.799875	NA	NA
cg10838789	-1.10894	-0.68567	-0.940563	-0.168373	0.254893	-0.423266	-2.05251	10.5063	0.000136792	0.073831	0.145263	0.291328	0.22773	0.321724	p1	LRRC67
cg13154908	0.249208	-0.496839	-1.47921	1.72842	0.982374	0.746047	2.33456	10.5046	0.00013694	0.073856	0.79437	0.89056	0.842692	0.769113	NA	NA
cg21299211	-0.516401	0.654348	1.26139	-1.7778	-0.607047	-1.17075	3.46818	10.5017	0.000137191	0.0738901	0.921119	0.87755	0.90274	0.940627	NA	NA
cg27392775	-1.5739	-0.498062	-0.237085	-1.33682	-0.260977	-1.07584	0.960304	10.5015	0.000137205	0.0738901	0.592185	0.605908	0.677597	0.822509	NA	NA
cg09255675	-1.35314	-0.451089	-0.0232305	-1.32991	-0.427858	-0.902051	0.409151	10.496	0.000137683	0.0739601	0.515803	0.506114	0.591388	0.748862	NA	NA
cg01369207	-1.68583	-0.561624	-0.404787	-1.28104	-0.156837	-1.1242	0.366052	10.4957	0.000137706	0.0739601	0.487033	0.541414	0.580673	0.77075	NA	NA
cg14426392	0.995433	0.5839	0.39372	0.601713	0.190179	0.411533	2.04396	10.4943	0.000137823	0.0739601	0.840368	0.807743	0.77877	0.704153	p	ATP1A1
cg05801388	-1.90975	-0.361112	0.148181	-2.05793	-0.509293	-1.54864	0.473433	10.4939	0.000137866	0.0739601	0.528518	0.468161	0.599835	0.78895	NA	NA
cg12294361	-1.05994	-0.359514	0.133946	-1.19389	-0.49346	-0.700427	0.285056	10.4938	0.000137867	0.0739601	0.515938	0.459821	0.559147	0.733572	NA	NA
cg00306951	-1.2698	0.0201448	0.551834	-1.82163	-0.53169	-1.28994	0.822686	10.4926	0.000137974	0.0739601	0.624254	0.550692	0.633684	0.779717	NA	NA
cg13578841	-1.28014	-0.741475	-0.479242	-0.800897	-0.262233	-0.538664	0.583784	10.4918	0.000138044	0.0739601	0.532114	0.554683	0.622789	0.767332	NA	NA
cg04177622	-1.67625	-0.586798	-0.13799	-1.53826	-0.448808	-1.08945	0.386635	10.4894	0.000138249	0.0739666	0.502293	0.471803	0.598233	0.754599	NA	NA
cg26031499	-1.44913	-0.302435	0.284115	-1.73325	-0.58655	-1.1467	1.22808	10.4874	0.000138428	0.0739666	0.658742	0.617596	0.726461	0.819524	NA	NA
cg19334801	-1.34696	-0.729912	-0.286358	-1.0606	-0.443554	-0.617045	-0.90831	10.4848	0.000138647	0.0739666	0.292582	0.278476	0.402453	0.510138	NA	NA
cg15890816	-1.97473	0.0954267	0.20129	-2.17602	-0.105863	-2.07016	-2.27749	10.4848	0.000138653	0.0739666	0.174483	0.15931	0.167915	0.34485	p1	NYAP2
cg25354551	0.660737	0.153122	-0.980311	1.64105	1.13343	0.507615	0.216658	10.4847	0.000138658	0.0739666	0.532927	0.691992	0.491398	0.476852	NA	NA
cg13293650	-1.07395	0.204954	-0.182253	-0.891695	0.387207	-1.2789	-3.09117	10.4847	0.000138664	0.0739666	0.110735	0.0929665	0.0872712	0.229963	p	OCA2
cg05574053	-1.49311	-0.566231	-0.182095	-1.31101	-0.384136	-0.926879	1.06288	10.4824	0.000138863	0.0740187	0.614192	0.564031	0.68091	0.872229	NA	NA
cg25541259	0.844566	0.657933	0.662592	0.181974	-0.00465842	0.186633	-1.66165	10.4801	0.000139058	0.0740536	0.300556	0.207412	0.212429	0.190197	NA	NA
cg02933431	-1.16067	-0.18112	0.978971	-2.13964	-1.16009	-0.979546	0.650208	10.4793	0.000139131	0.0740536	0.593651	0.428391	0.63427	0.776686	NA	NA
cg15987506	-1.56085	-0.343359	0.3808	-1.94165	-0.724159	-1.21749	2.80292	10.475	0.000139503	0.0741514	0.839439	0.826601	0.888581	0.929104	NA	NA
cg08258740	0.977946	0.657338	0.659418	0.318528	-0.00208018	0.320608	1.08932	10.4733	0.000139655	0.0741514	0.737834	0.646723	0.631545	0.61951	NA	NA
cg14586373	1.13284	1.09799	0.406473	0.726365	0.691517	0.0348478	-1.14242	10.4699	0.000139954	0.0741514	0.418085	0.30209	0.248389	0.256556	NA	NA
cg08540835	-1.22941	-0.498765	-0.428044	-0.801369	-0.0707209	-0.730648	0.0592057	10.4696	0.00013998	0.0741514	0.449545	0.481011	0.520215	0.720152	NA	NA
cg12952748	1.23027	0.0635866	-0.156052	1.38632	0.219639	1.16668	3.02831	10.4688	0.000140056	0.0741514	0.902967	0.89295	0.888455	0.817595	p1,p1	ISPD-AS1,ISPD
cg14968445	0.890751	0.651992	0.202035	0.688715	0.449957	0.238759	2.67464	10.4666	0.000140242	0.0741514	0.89055	0.875156	0.832606	0.818215	p	GTF2E1
cg03405785	-0.594152	-0.687391	-0.531608	-0.0625439	-0.155783	0.0932387	-0.71812	10.4666	0.000140245	0.0741514	0.316758	0.382603	0.431068	0.446202	NA	NA
cg06732258	0.948755	0.714033	0.316404	0.632352	0.39763	0.234722	2.98925	10.4658	0.000140317	0.0741514	0.914842	0.884771	0.860236	0.838576	NA	NA
cg15356529	1.21607	0.459843	0.0313861	1.18468	0.428457	0.756223	1.41107	10.4656	0.000140334	0.0741514	0.760363	0.768782	0.704185	0.57666	NA	NA
cg17063269	-1.09606	-0.640178	-0.0556596	-1.0404	-0.584519	-0.455879	0.122446	10.4637	0.000140498	0.0741514	0.455405	0.456572	0.572842	0.658294	NA	NA
cg08304279	-0.964398	-0.784646	-0.231409	-0.732989	-0.553238	-0.179751	-0.741478	10.4634	0.000140527	0.0741514	0.30783	0.335739	0.436666	0.508397	NA	NA
cg25920590	1.2688	0.551358	0.452399	0.816403	0.0989595	0.717444	0.829548	10.4633	0.000140533	0.0741514	0.690285	0.651732	0.615067	0.471333	NA	NA
cg01207684	-0.867233	-0.716067	-0.722962	-0.144271	0.00689559	-0.151167	-0.534137	10.4582	0.000140984	0.0742611	0.337369	0.450082	0.450315	0.498289	NA	NA
cg03729676	1.27117	0.906557	0.228479	1.04269	0.678078	0.364611	0.859296	10.4541	0.000141355	0.0742611	0.716504	0.694051	0.575847	0.461073	NA	NA
cg00940095	-1.48891	-0.575156	-0.557936	-0.93097	-0.0172202	-0.913749	0.248336	10.4526	0.000141484	0.0742611	0.464259	0.544079	0.553146	0.761591	NA	NA
cg06005318	1.51736	-0.205622	-0.571682	2.08905	0.366061	1.72299	-1.13116	10.4525	0.000141494	0.0742611	0.343909	0.36232	0.330193	0.20917	p1	TUBB
cg23150343	-1.08049	-0.491692	-0.586018	-0.494469	0.0943257	-0.588794	-0.247271	10.4524	0.000141499	0.0742611	0.392683	0.520331	0.465911	0.598696	p4	TCF4
cg07989614	-1.30682	-0.465225	0.212816	-1.51963	-0.678042	-0.841591	-1.55648	10.4523	0.000141512	0.0742611	0.222879	0.204808	0.287286	0.391277	p	DLGAP1
cg25530397	-1.53645	-0.754615	-0.832093	-0.70436	0.0774774	-0.781837	2.03409	10.4518	0.000141556	0.0742611	0.739939	0.794204	0.795855	0.906562	NA	NA
cg20715159	-1.17616	-0.496938	-0.222893	-0.953272	-0.274046	-0.679226	-1.4028	10.4512	0.000141614	0.0742611	0.236332	0.255557	0.300736	0.398009	p	ARHGAP26
cg12151124	0.932556	0.404617	0.698808	0.233747	-0.294191	0.527938	-2.27052	10.4487	0.000141828	0.0742611	0.204464	0.158533	0.16723	0.122499	p3	ICAM1
cg11953335	1.30289	0.837929	0.639814	0.663078	0.198114	0.464963	0.917495	10.4481	0.000141884	0.0742611	0.734994	0.612889	0.59903	0.507028	NA	NA
cg26212321	0.942271	0.762935	0.494327	0.447944	0.268607	0.179337	1.87653	10.4478	0.000141915	0.0742611	0.834016	0.769826	0.742914	0.704281	NA	NA
cg04151727	-1.07322	-0.709308	-0.320128	-0.753095	-0.38918	-0.363915	-0.915573	10.4471	0.000141978	0.0742611	0.284242	0.317026	0.400406	0.477051	NA	NA
cg22889646	0.508835	0.933921	1.08425	-0.575412	-0.150325	-0.425087	-0.0190674	10.4448	0.000142176	0.0742611	0.600454	0.363873	0.445998	0.466944	p	KIF13B
cg03675258	1.24255	0.332197	0.16095	1.0816	0.171247	0.910348	-0.634837	10.4443	0.000142228	0.0742611	0.460689	0.346059	0.376974	0.286025	NA	NA
cg09180181	-1.05787	-0.776334	-0.691504	-0.366365	-0.0848298	-0.281535	-0.270458	10.4416	0.000142467	0.0742611	0.401557	0.401683	0.487938	0.612717	p1	STOX2
cg04536856	-1.31895	-0.416801	-0.0838197	-1.23513	-0.332982	-0.902144	-0.422949	10.4414	0.000142488	0.0742611	0.378508	0.369506	0.455623	0.613651	NA	NA
cg10744928	0.628792	0.66135	1.13438	-0.505589	-0.473032	-0.0325575	3.87006	10.4408	0.000142543	0.0742611	0.948459	0.91863	0.923485	0.922984	NA	NA
cg26835283	-1.06871	-0.745174	-0.0920532	-0.976659	-0.653121	-0.323538	0.62355	10.4393	0.000142673	0.0742611	0.530053	0.561097	0.659772	0.721879	NA	NA
cg15287310	1.3601	0.377914	-0.0458885	1.40598	0.423802	0.982182	1.6666	10.4384	0.000142757	0.0742611	0.793945	0.784906	0.726145	0.643074	NA	NA
cg03026119	-1.55501	-0.260798	-0.0201488	-1.53486	-0.24065	-1.29422	1.32923	10.4376	0.000142827	0.0742611	0.654297	0.726144	0.723953	0.789808	NA	NA
cg10028136	-1.3249	0.000120123	0.475344	-1.80024	-0.475223	-1.32502	0.549374	10.436	0.000142969	0.0742611	0.578351	0.506329	0.581153	0.744245	NA	NA
cg21724915	-1.36723	-0.404088	0.00305167	-1.37028	-0.40714	-0.963141	0.014126	10.4356	0.00014301	0.0742611	0.450696	0.448146	0.515045	0.709708	NA	NA
cg08453036	-1.72171	0.123047	0.32247	-2.04418	-0.199423	-1.84476	-2.04503	10.4348	0.00014308	0.0742611	0.184098	0.1766	0.17685	0.438027	NA	NA
cg01869233	-1.47958	-0.603103	-0.326175	-1.15341	-0.276928	-0.876481	-0.822505	10.4327	0.000143268	0.0742927	0.307209	0.324811	0.387734	0.553969	p5	LRRN4
cg06542172	-1.24233	-0.516711	-0.297031	-0.945299	-0.21968	-0.725619	0.315452	10.4314	0.000143387	0.0742927	0.49407	0.528175	0.574837	0.720687	NA	NA
cg02258482	-1.06848	-0.65835	-0.384378	-0.684098	-0.273972	-0.410127	-0.720606	10.4305	0.00014347	0.0742927	0.311654	0.374064	0.419789	0.509192	NA	NA
cg23841470	-1.3592	-0.502778	-0.136245	-1.22296	-0.366533	-0.856426	-0.341986	10.4287	0.000143626	0.0742927	0.387702	0.385603	0.476299	0.614727	p9	ARHGAP24
cg17027335	-1.16816	-0.3607	0.126218	-1.29438	-0.486918	-0.807462	0.824283	10.4268	0.000143799	0.0742927	0.596762	0.556429	0.632516	0.836688	NA	NA
cg00207352	-0.812358	-0.822596	-0.793652	-0.0187064	-0.0289437	0.0102373	-0.926905	10.4243	0.000144029	0.0742927	0.286951	0.361604	0.392857	0.415718	NA	NA
cg23848712	-1.54333	-0.702692	-0.19046	-1.35287	-0.512232	-0.840642	-0.169343	10.4232	0.000144124	0.0742927	0.403724	0.409425	0.509692	0.679	NA	NA
cg23213770	-1.11741	-0.499456	-0.399766	-0.71764	-0.0996897	-0.61795	-0.464711	10.4232	0.000144125	0.0742927	0.367836	0.402574	0.44418	0.572359	NA	NA
cg06385281	1.0494	0.48166	-0.0890127	1.13841	0.570673	0.567737	0.5001	10.4232	0.000144127	0.0742927	0.640102	0.630161	0.545782	0.440672	p	ZDHHC18
cg06991078	-1.32345	-0.194631	-0.371027	-0.952426	0.176396	-1.12882	1.08291	10.4229	0.000144158	0.0742927	0.639251	0.694381	0.672387	0.792775	NA	NA
cg22006852	1.23431	0.435346	0.1646	1.06971	0.270746	0.798966	1.55961	10.4211	0.00014432	0.0743147	0.784456	0.748255	0.731037	0.61053	NA	NA
cg15981281	-1.10599	-0.206679	-0.213397	-0.892598	0.00671769	-0.899315	-2.03795	10.4201	0.000144405	0.0743147	0.172678	0.195732	0.197646	0.306002	NA	NA
cg25563198	-1.14958	-0.170208	0.195196	-1.34478	-0.365403	-0.979376	0.285762	10.418	0.000144596	0.0743329	0.516337	0.512775	0.547545	0.701276	NA	NA
cg18640030	-1.03972	-0.84646	0.0824012	-1.12212	-0.928861	-0.193256	0.375734	10.414	0.000144965	0.0743329	0.482835	0.510054	0.619421	0.720746	p1	CRH
cg06070582	-1.04971	-0.51962	-0.399468	-0.650238	-0.120151	-0.530087	-0.879876	10.4129	0.000145067	0.0743329	0.313767	0.316354	0.374878	0.505143	NA	NA
cg00618626	-1.2013	-0.610802	-0.209831	-0.991467	-0.400971	-0.590496	0.391221	10.4119	0.000145153	0.0743329	0.504931	0.516661	0.608304	0.705306	NA	NA
cg01629545	1.28199	0.35387	-0.206427	1.48841	0.560296	0.928116	1.63413	10.4115	0.000145193	0.0743329	0.782395	0.802948	0.726288	0.622505	NA	NA
cg23506629	-1.02786	-0.467347	-0.196739	-0.831122	-0.270608	-0.560513	-0.0108036	10.4108	0.000145255	0.0743329	0.43983	0.472476	0.52998	0.637956	p2	LLGL2
cg18937354	1.42742	-0.265215	-0.140228	1.56765	-0.124987	1.69264	0.6334	10.4093	0.000145392	0.0743329	0.624797	0.590204	0.653441	0.381744	NA	NA
cg15610548	-1.40975	0.528749	0.361648	-1.7714	0.167101	-1.9385	-2.66855	10.4077	0.000145545	0.0743329	0.149512	0.126206	0.108686	0.29873	p1	FGF5
cg14193343	-1.26231	-0.21438	-0.0367944	-1.22552	-0.177586	-1.04793	1.10722	10.4063	0.000145671	0.0743329	0.643326	0.667044	0.677892	0.812483	NA	NA
cg09430518	-1.5609	-0.521042	-0.470041	-1.09086	-0.0510002	-1.03986	0.171502	10.4051	0.000145779	0.0743329	0.462968	0.536204	0.53512	0.726383	NA	NA
cg17367776	-1.05797	-0.578279	-0.258402	-0.799573	-0.319877	-0.479695	-1.1369	10.405	0.000145789	0.0743329	0.272918	0.279871	0.350847	0.411669	p8	KIF21A
cg06168149	-1.22847	-0.445822	-0.0948806	-1.13359	-0.350941	-0.78265	-1.82386	10.4045	0.000145836	0.0743329	0.189155	0.18989	0.245714	0.341951	p1	GPD1
cg07538187	1.12837	0.878031	0.123956	1.00441	0.754076	0.250339	1.66287	10.4042	0.000145858	0.0743329	0.819778	0.773861	0.700721	0.621666	NA	NA
cg04296187	1.1268	0.45205	0.865333	0.261466	-0.413283	0.674749	3.87479	10.4031	0.000145968	0.0743329	0.945166	0.922308	0.931421	0.901391	NA	NA
cg25806563	1.85286	0.689703	0.377257	1.47561	0.312447	1.16316	-0.520267	10.4028	0.000145994	0.0743329	0.501151	0.441172	0.379173	0.203121	NA	NA
cg07638450	-1.17582	-0.619388	-0.247502	-0.928321	-0.371885	-0.556436	0.918337	10.402	0.000146069	0.0743329	0.58999	0.616665	0.689254	0.773797	NA	NA
cg23685650	-1.40043	-0.501003	-0.178003	-1.22242	-0.323001	-0.899424	-0.0527241	10.3999	0.000146262	0.0743792	0.432127	0.474786	0.50075	0.685486	NA	NA
cg11792124	-1.57278	-0.755139	-0.296577	-1.2762	-0.458562	-0.81764	-0.263445	10.3906	0.000147119	0.0747074	0.358112	0.48664	0.516152	0.564713	NA	NA
cg13479077	-1.2846	-0.379671	0.0186828	-1.30328	-0.398354	-0.904928	-0.590816	10.3905	0.00014713	0.0747074	0.366464	0.329801	0.421654	0.562653	NA	NA
cg06100210	1.24837	0.10131	-0.583692	1.83206	0.685002	1.14706	0.52322	10.3896	0.000147214	0.0747074	0.62949	0.607095	0.568363	0.452004	NA	NA
cg06158754	-0.970494	-0.651231	-0.516886	-0.453608	-0.134345	-0.319263	-0.207104	10.3871	0.000147443	0.0747206	0.40024	0.462724	0.48827	0.63208	NA	NA
cg25208017	-1.96758	0.0825956	1.84548	-3.81306	-1.76288	-2.05018	-1.06486	10.3871	0.000147444	0.0747206	0.28659	0.370663	0.372482	0.493584	p1	FMN2
cg07998923	0.809015	0.651208	0.231953	0.577062	0.419255	0.157807	2.37088	10.3826	0.000147864	0.0748814	0.868494	0.840372	0.805633	0.774525	p13	KIAA0430
cg27613273	-0.517199	-0.810747	-0.478722	-0.0384769	-0.332024	0.293547	-1.74628	10.3768	0.000148409	0.0750921	0.185672	0.21941	0.288958	0.253217	NA	NA
cg13254518	-1.70362	-0.1692	0.109361	-1.81298	-0.278561	-1.53442	1.00518	10.3748	0.000148598	0.0750921	0.615863	0.608406	0.646044	0.864111	NA	NA
cg13358061	-0.984949	-0.496933	-0.0724469	-0.912502	-0.424486	-0.488016	0.981422	10.3707	0.000148975	0.0750921	0.611357	0.593067	0.689422	0.792877	NA	NA
cg21207418	1.22624	-0.160469	-0.350722	1.57696	0.190252	1.38671	1.8295	10.3705	0.000148994	0.0750921	0.791164	0.790244	0.782067	0.652707	p1	ACP5
cg26174216	-1.41875	-0.34871	-0.0352512	-1.3835	-0.313459	-1.07004	1.1975	10.3702	0.000149021	0.0750921	0.64554	0.66775	0.707552	0.818538	NA	NA
cg17128666	1.2407	-0.0830776	-0.393573	1.63428	0.310496	1.32378	-0.685183	10.3695	0.00014909	0.0750921	0.403627	0.431445	0.397571	0.236614	NA	NA
cg11346377	0.654612	0.734237	0.446237	0.208374	0.288	-0.0796259	1.40827	10.3691	0.000149133	0.0750921	0.770409	0.743673	0.682513	0.648778	NA	NA
cg08753002	-1.92891	-0.568617	-0.485767	-1.44315	-0.0828502	-1.3603	0.563011	10.3676	0.000149271	0.0750921	0.520117	0.55697	0.603301	0.820672	NA	NA
cg24536751	-1.16834	-0.583975	-0.398642	-0.769696	-0.185333	-0.584363	0.9706	10.3674	0.000149289	0.0750921	0.603474	0.65358	0.694874	0.73903	NA	NA
cg00158770	-0.857632	-0.595644	0.0247706	-0.882403	-0.620415	-0.261988	0.762921	10.3672	0.000149309	0.0750921	0.588129	0.538041	0.661997	0.751224	NA	NA
cg18450254	-2.06354	-0.739014	-0.504659	-1.55888	-0.234355	-1.32452	-1.3222	10.365	0.000149519	0.0751461	0.220696	0.290674	0.312042	0.553902	NA	NA
cg09801339	1.41969	0.339942	0.0053812	1.41431	0.334561	1.07975	-0.73502	10.362	0.0001498	0.0752002	0.434219	0.398046	0.356495	0.2284	NA	NA
cg13555415	1.14777	0.625956	0.532119	0.615655	0.0938372	0.521818	1.272	10.3615	0.000149851	0.0752002	0.761817	0.693032	0.674409	0.579255	NA	NA
cg12603576	-1.4738	-0.512563	-0.028415	-1.44538	-0.484148	-0.961233	-2.59022	10.36	0.000149985	0.0752002	0.120243	0.133769	0.16018	0.266828	p1	GAL
cg04734103	-0.953867	-0.470535	-0.292936	-0.660931	-0.177599	-0.483332	0.457756	10.3585	0.000150136	0.0752002	0.530258	0.548159	0.610001	0.671743	NA	NA
cg04813376	-1.53444	-0.226048	-0.0106894	-1.52376	-0.215359	-1.3084	1.21838	10.3578	0.000150194	0.0752002	0.635419	0.70246	0.708602	0.778706	NA	NA
cg16867466	-1.21821	-0.254939	0.532745	-1.75096	-0.787685	-0.963271	1.09785	10.3573	0.000150244	0.0752002	0.630968	0.62979	0.69281	0.812009	NA	NA
cg18081863	-0.70436	-0.883248	-0.424864	-0.279497	-0.458384	0.178887	-0.759101	10.353	0.000150652	0.0752812	0.303722	0.371099	0.438955	0.436951	NA	NA
cg17105005	-1.08884	-0.602121	-0.319809	-0.769031	-0.282311	-0.486719	-0.441564	10.3511	0.000150834	0.0752812	0.369615	0.383403	0.459413	0.581065	NA	NA
cg25892278	1.16545	-0.0634517	0.329818	0.83563	-0.393269	1.2289	2.73736	10.351	0.000150849	0.0752812	0.883646	0.840384	0.876326	0.798033	NA	NA
cg27518892	-0.950144	-0.683462	-0.261565	-0.688579	-0.421897	-0.266682	-1.28388	10.3497	0.000150972	0.0752812	0.249728	0.247441	0.327974	0.422454	NA	NA
cg06466796	-1.2458	-0.326591	-0.113533	-1.13226	-0.213058	-0.919206	0.199158	10.3473	0.000151195	0.0752812	0.482202	0.522414	0.54732	0.683876	p	TNS1
cg03708250	-1.01776	-0.78483	-0.568172	-0.449592	-0.216658	-0.232934	-0.00580893	10.3449	0.000151429	0.0752812	0.419804	0.504205	0.560638	0.572306	NA	NA
cg18896032	0.766099	0.664908	0.310841	0.455258	0.354067	0.101191	2.74468	10.344	0.000151513	0.0752812	0.89558	0.866577	0.840298	0.833118	NA	NA
cg04148584	-2.1402	0.0102071	0.510003	-2.6502	-0.499796	-2.1504	-3.14904	10.3432	0.000151591	0.0752812	0.100123	0.0823313	0.105539	0.351851	p1	LAMB1
cg00986742	-1.75601	-0.609523	0.0296752	-1.78568	-0.639199	-1.14648	-2.12062	10.3418	0.000151721	0.0752812	0.151174	0.153058	0.210689	0.406007	p1	LRRC52
cg03184218	-1.17894	-0.285891	0.198013	-1.37695	-0.483904	-0.893047	0.63233	10.3403	0.000151873	0.0752812	0.570879	0.505782	0.613803	0.793168	NA	NA
cg26692003	0.857233	0.76605	0.288881	0.568353	0.477169	0.0911833	2.49223	10.339	0.000151997	0.0752812	0.882019	0.849353	0.804154	0.810602	NA	NA
cg24106002	-1.27101	-0.207047	-0.126182	-1.14483	-0.0808647	-1.06397	0.302245	10.3387	0.00015202	0.0752812	0.50756	0.538346	0.553898	0.706717	NA	NA
cg10021494	-0.0360749	0.693174	0.618356	-0.65443	0.0748184	-0.729249	2.04282	10.3384	0.000152047	0.0752812	0.82494	0.771716	0.779121	0.795747	NA	NA
cg05230694	-1.37984	-0.704185	-0.207872	-1.17197	-0.496313	-0.67566	0.675952	10.3384	0.000152048	0.0752812	0.54366	0.533519	0.645716	0.801979	NA	NA
cg09848445	1.09969	0.854254	0.358162	0.741524	0.496092	0.245431	3.95558	10.3382	0.000152073	0.0752812	0.95499	0.93175	0.921309	0.9057	NA	NA
cg05182302	0.606478	-0.916883	-0.326745	0.933223	-0.590138	1.52336	-0.321192	10.337	0.000152188	0.0752812	0.408881	0.429404	0.530148	0.333727	NA	NA
cg24099241	-1.10129	-0.661687	-0.0321767	-1.06911	-0.629511	-0.439598	1.47935	10.3364	0.000152247	0.0752812	0.669503	0.684583	0.761019	0.853412	NA	NA
cg25997486	0.698444	0.73402	0.582476	0.115968	0.151544	-0.0355759	0.835249	10.3362	0.000152262	0.0752812	0.703955	0.62532	0.594354	0.538857	NA	NA
cg14402955	-0.198799	1.03534	1.01052	-1.20932	0.024822	-1.23414	4.17995	10.3345	0.000152423	0.0752827	0.957394	0.93626	0.927579	0.956922	NA	NA
cg07839071	-1.23039	-0.690869	-0.289134	-0.941251	-0.401734	-0.539517	-0.881983	10.3339	0.00015248	0.0752827	0.284458	0.331373	0.413619	0.468928	NA	NA
cg24376271	-1.53511	0.06797	-0.0756964	-1.45941	0.143666	-1.60308	1.34724	10.3328	0.000152594	0.0752827	0.692526	0.692414	0.691665	0.855068	NA	NA
cg05263620	1.47573	0.466721	0.0767802	1.39895	0.38994	1.00901	1.25749	10.3319	0.000152677	0.0752827	0.757439	0.69918	0.681629	0.515717	NA	NA
cg02738617	-1.37404	-0.281116	-0.4498	-0.924239	0.168684	-1.09292	-1.02141	10.3284	0.000153012	0.0753971	0.300888	0.324837	0.333015	0.479392	NA	NA
cg08412053	1.40627	0.240864	0.139502	1.26677	0.101363	1.16541	2.07484	10.3263	0.000153225	0.0754507	0.840461	0.787001	0.790966	0.697609	NA	NA
cg17155010	1.46065	0.313454	0.468019	0.992628	-0.154565	1.14719	-0.0612754	10.3242	0.000153424	0.075498	0.548645	0.477024	0.467831	0.369329	p	LOC100506860
cg04218566	0.545505	-0.931906	-0.174672	0.720177	-0.757234	1.47741	2.19063	10.3202	0.000153808	0.0756362	0.780312	0.816229	0.86081	0.702733	NA	NA
cg14256268	-1.48034	-0.605888	-0.130195	-1.35015	-0.475693	-0.874455	-0.0135157	10.3186	0.000153972	0.075656	0.434327	0.431443	0.532239	0.693201	NA	NA
cg13788918	-1.20067	0.14586	0.189507	-1.39018	-0.0436477	-1.34653	1.90767	10.3175	0.000154071	0.075656	0.770962	0.753386	0.78	0.854656	NA	NA
cg14578146	-1.22563	-0.177083	-0.741713	-0.483917	0.564631	-1.04855	1.76361	10.3166	0.00015416	0.075656	0.730072	0.796471	0.762526	0.849992	p4	AK1
cg07545526	1.19757	0.548701	0.182699	1.01487	0.366002	0.648864	1.20139	10.3142	0.000154394	0.0757201	0.750036	0.710763	0.652499	0.569201	NA	NA
cg08811482	0.965259	0.646508	0.307885	0.657374	0.338623	0.318751	2.19666	10.3108	0.000154732	0.0757454	0.854453	0.823451	0.7912	0.752924	NA	NA
cg05460903	-1.20031	-0.340549	0.134055	-1.33436	-0.474604	-0.859756	-0.0716379	10.3107	0.000154741	0.0757454	0.43865	0.457161	0.498403	0.672579	p,p	LOC101929570,KCNH7
cg03908932	-1.30426	0.525648	0.179713	-1.48397	0.345935	-1.8299	-1.43824	10.3105	0.000154757	0.0757454	0.270773	0.321873	0.243685	0.384281	NA	NA
cg14399271	-0.953915	0.299879	0.666845	-1.62076	-0.366966	-1.25379	1.07567	10.3091	0.000154899	0.0757642	0.685219	0.590616	0.646312	0.808021	NA	NA
cg24042578	-1.32333	-0.904987	-0.897118	-0.426209	-0.00786936	-0.41834	-0.108358	10.3059	0.000155215	0.0758683	0.39342	0.486188	0.528822	0.649552	NA	NA
cg01399402	1.06234	0.455957	0.420127	0.642217	0.0358307	0.606386	0.434029	10.3004	0.000155759	0.0758971	0.621622	0.556853	0.551416	0.475747	NA	NA
cg04071264	-1.23928	-0.656267	-0.683366	-0.555915	0.0270982	-0.583013	0.688278	10.3	0.000155797	0.0758971	0.534407	0.623666	0.632354	0.782073	NA	NA
cg18693202	-1.7191	-0.59405	-0.401353	-1.31775	-0.192697	-1.12505	0.599984	10.2995	0.00015584	0.0758971	0.510983	0.621378	0.633433	0.745539	NA	NA
cg05330301	-1.55529	-0.167201	-0.0176653	-1.53763	-0.149536	-1.38809	1.64039	10.2979	0.000156005	0.0758971	0.714226	0.757259	0.749889	0.82558	NA	NA
cg14531564	1.1584	0.726149	0.488731	0.669665	0.237418	0.432247	1.59152	10.2961	0.000156183	0.0758971	0.796404	0.748668	0.718416	0.630016	p	SDF4
cg12513870	-0.906948	-0.876635	-0.452107	-0.454841	-0.424528	-0.0303134	-0.127166	10.2953	0.000156261	0.0758971	0.414626	0.411948	0.540914	0.586816	p	AGAP3
cg12684668	-1.20653	-0.168828	0.488105	-1.69464	-0.656933	-1.0377	-0.0686015	10.2949	0.000156294	0.0758971	0.481057	0.352128	0.49708	0.655835	NA	NA
cg14453876	1.14384	0.865792	0.592176	0.551665	0.273616	0.27805	2.25387	10.2948	0.000156306	0.0758971	0.861636	0.836503	0.789727	0.719608	NA	NA
cg14222615	-1.47915	-0.547047	-0.600869	-0.878277	0.0538221	-0.932099	0.451353	10.2936	0.000156425	0.0758971	0.499112	0.587904	0.593954	0.750592	p6	FN1
cg26021928	0.691459	0.700123	0.850333	-0.158874	-0.15021	-0.00866362	-0.291576	10.2935	0.000156437	0.0758971	0.526389	0.379046	0.406368	0.438419	NA	NA
cg07354209	-1.30099	0.272195	0.79002	-2.09101	-0.517825	-1.57318	-0.102312	10.2928	0.000156502	0.0758971	0.473297	0.461842	0.485748	0.535314	p1	FAP
cg23782224	1.48826	0.231164	0.191007	1.29726	0.0401574	1.2571	2.00131	10.2926	0.000156522	0.0758971	0.817011	0.828506	0.801401	0.620408	p8	ACKR2
cg14254704	1.06332	0.88199	0.26668	0.796636	0.61531	0.181326	2.47728	10.2899	0.000156789	0.0759574	0.882294	0.862184	0.801054	0.785928	NA	NA
cg07382347	0.305105	0.957228	0.627838	-0.322732	0.329391	-0.652123	2.1821	10.2883	0.000156955	0.0759574	0.851133	0.827139	0.770305	0.783165	NA	NA
cg15691178	1.00362	0.655282	-0.0599261	1.06355	0.715208	0.348338	1.18913	10.2857	0.000157215	0.0759574	0.744462	0.72557	0.646909	0.581688	NA	NA
cg17569124	-0.960076	-0.720775	-0.389513	-0.570563	-0.331262	-0.239302	-0.0888703	10.2846	0.000157325	0.0759574	0.418492	0.482584	0.516797	0.62471	NA	NA
cg13804141	1.17315	0.593857	0.212053	0.961098	0.381804	0.579294	2.08815	10.2838	0.000157406	0.0759574	0.826023	0.847234	0.760618	0.762857	NA	NA
cg12593793	-1.42811	-0.57091	-0.165934	-1.26218	-0.404977	-0.857202	-2.68255	10.2819	0.000157593	0.0759574	0.110278	0.11326	0.156842	0.241948	NA	NA
cg26221796	-0.841049	-0.747904	-0.0350246	-0.806024	-0.71288	-0.0931444	1.11635	10.28	0.000157787	0.0759574	0.633763	0.595883	0.732317	0.758789	NA	NA
cg04531854	1.1271	0.536802	0.228756	0.898343	0.308047	0.590297	2.83545	10.2785	0.000157937	0.0759574	0.901536	0.87854	0.854263	0.82336	NA	NA
cg12785993	-1.48399	-0.359021	-0.147088	-1.3369	-0.211932	-1.12497	1.07218	10.2783	0.000157954	0.0759574	0.624902	0.658031	0.693616	0.77182	NA	NA
cg17017514	-1.07476	-0.572517	-0.429755	-0.645	-0.142762	-0.502238	-0.308535	10.278	0.000157985	0.0759574	0.393894	0.417295	0.478339	0.592881	NA	NA
cg04100107	-1.37205	-0.221651	-0.029153	-1.34289	-0.192498	-1.1504	-2.07598	10.2765	0.00015813	0.0759574	0.16797	0.197415	0.207019	0.294735	p4	ENST00000550042
cg06033949	-1.09757	-0.72146	-0.448535	-0.649039	-0.272925	-0.376114	0.255769	10.2756	0.000158225	0.0759574	0.472589	0.513452	0.588532	0.681274	NA	NA
cg06865026	-0.530525	-0.852355	-0.411292	-0.119232	-0.441063	0.32183	-0.0548993	10.2752	0.000158261	0.0759574	0.416265	0.475739	0.570706	0.517139	NA	NA
cg02005147	-1.07006	-0.964442	-1.59096	0.520904	0.626518	-0.105614	-2.61052	10.2748	0.0001583	0.0759574	0.0958286	0.231114	0.173262	0.197081	p1	HHIPL1
cg16450097	-1.08078	-0.708914	-0.199459	-0.881322	-0.509455	-0.371868	0.966878	10.2747	0.000158318	0.0759574	0.594272	0.591093	0.69607	0.802692	p9	RNF19A
cg13378368	-1.26805	-0.607791	-0.222441	-1.04561	-0.38535	-0.660258	0.0553592	10.2737	0.000158415	0.0759574	0.437821	0.469559	0.547301	0.693057	NA	NA
cg26913800	-1.34823	-0.191577	0.0910175	-1.43925	-0.282594	-1.15665	-0.270024	10.2723	0.000158559	0.0759574	0.413704	0.399036	0.466028	0.634027	NA	NA
cg05855878	1.15609	0.0790996	0.528355	0.627738	-0.449255	1.07699	2.40506	10.2713	0.000158658	0.0759574	0.85469	0.814625	0.843609	0.760236	NA	NA
cg17408972	-1.24227	-0.314536	0.0143241	-1.2566	-0.32886	-0.927738	-0.486636	10.27	0.000158787	0.0759574	0.38254	0.346019	0.433789	0.602588	NA	NA
cg13664391	-1.5732	-0.641428	-0.36786	-1.20534	-0.273568	-0.931775	1.04184	10.2697	0.000158818	0.0759574	0.608415	0.612389	0.696593	0.826796	NA	NA
cg17260968	-1.03328	-0.688269	-0.120788	-0.912494	-0.56748	-0.345014	0.347473	10.2695	0.000158842	0.0759574	0.491118	0.488093	0.613547	0.695627	NA	NA
cg02371631	-0.878058	0.227373	0.729984	-1.60804	-0.502611	-1.10543	1.67803	10.2685	0.000158934	0.0759574	0.760636	0.678846	0.756802	0.815117	NA	NA
cg00914315	-1.39473	-0.495957	0.218969	-1.6137	-0.714926	-0.898777	0.340598	10.2649	0.000159306	0.0759822	0.517389	0.431913	0.574693	0.776282	NA	NA
cg27111050	1.26054	0.245421	-0.173694	1.43423	0.419116	1.01512	1.0082	10.2648	0.000159308	0.0759822	0.71441	0.679725	0.645112	0.482153	p	SPOPL
cg24401193	1.15884	0.0461818	-1.26441	2.42325	1.31059	1.11266	2.49731	10.2645	0.000159345	0.0759822	0.830321	0.903436	0.823356	0.750805	NA	NA
cg03029127	0.536816	-0.587361	0.00220105	0.534615	-0.589562	1.12418	-2.15535	10.2639	0.000159402	0.0759822	0.183254	0.157372	0.214729	0.180538	NA	NA
cg19506215	-1.07601	-0.32947	0.743873	-1.81988	-1.07334	-0.746538	1.41886	10.2628	0.000159516	0.0759865	0.685873	0.651485	0.738016	0.851188	NA	NA
cg09331545	0.912024	0.755048	0.503983	0.408041	0.251065	0.156976	1.17498	10.2593	0.000159873	0.0760129	0.745292	0.715047	0.642969	0.573049	NA	NA
cg11908758	-1.37892	-0.38808	0.205784	-1.5847	-0.593864	-0.990839	0.540483	10.2584	0.000159963	0.0760129	0.539083	0.516524	0.614233	0.771115	NA	NA
cg05985907	-1.72396	-0.176498	-0.56364	-1.16032	0.387142	-1.54746	-1.89866	10.257	0.0001601	0.0760129	0.181733	0.268701	0.194251	0.412089	NA	NA
cg02268988	-1.01392	-0.268542	0.504525	-1.51845	-0.773068	-0.745379	1.91913	10.2546	0.000160346	0.0760129	0.785402	0.638467	0.788252	0.887189	NA	NA
cg18896448	-1.1832	0.235543	-0.0464133	-1.13679	0.281956	-1.41874	-3.91161	10.2543	0.000160378	0.0760129	0.0602909	0.0643959	0.0559652	0.114962	NA	NA
cg03537657	1.0412	0.77345	0.428656	0.612545	0.344794	0.267751	2.29358	10.2541	0.000160396	0.0760129	0.869485	0.833354	0.792436	0.746183	NA	NA
cg13413451	0.897504	1.10682	0.446382	0.451122	0.660435	-0.209313	2.71038	10.2519	0.000160623	0.0760129	0.902824	0.870729	0.808294	0.832008	NA	NA
cg15155209	-1.36002	-0.573171	-0.448096	-0.911921	-0.125075	-0.786846	-0.729883	10.2509	0.000160726	0.0760129	0.318727	0.370886	0.401734	0.548933	NA	NA
cg25602049	1.19775	0.362034	0.385764	0.811989	-0.02373	0.835719	-3.07076	10.2482	0.000161003	0.0760129	0.125829	0.120526	0.104929	0.05778	p1	VARS2
cg11265734	-1.38617	-0.392207	-0.323789	-1.06238	-0.0684176	-0.993966	0.616001	10.2475	0.000161068	0.0760129	0.559596	0.562749	0.615648	0.760079	NA	NA
cg21543918	-1.45708	-0.82335	-0.553308	-0.903776	-0.270042	-0.633734	0.0413554	10.2468	0.000161141	0.0760129	0.421997	0.486211	0.562829	0.655308	NA	NA
cg17653942	1.08703	0.697093	0.417835	0.669198	0.279259	0.389939	2.74171	10.2467	0.000161156	0.0760129	0.901168	0.853989	0.834547	0.831207	NA	NA
cg05161209	-1.24173	-0.603028	-0.215859	-1.02587	-0.38717	-0.638705	0.514404	10.2463	0.000161197	0.0760129	0.527531	0.539844	0.624071	0.726276	NA	NA
cg03876423	-0.825175	-0.641261	-1.44517	0.61999	0.803904	-0.183914	1.56078	10.2461	0.000161211	0.0760129	0.673757	0.848421	0.754713	0.767378	NA	NA
cg20527746	-1.32611	-0.638284	-0.281422	-1.04469	-0.356861	-0.687826	0.0626489	10.2461	0.000161217	0.0760129	0.442321	0.476602	0.54844	0.676977	p4	RAPGEF2
cg05192388	1.35772	-0.208401	-0.47925	1.83697	0.270849	1.56612	1.57106	10.2443	0.000161399	0.0760129	0.751902	0.786885	0.765954	0.554868	NA	NA
cg07338464	-1.24245	-0.424562	-0.715513	-0.526942	0.290951	-0.817893	0.0985641	10.2428	0.000161559	0.0760129	0.442805	0.573418	0.526113	0.662274	NA	NA
cg24757778	-1.10212	-0.450188	-0.101249	-1.00088	-0.348939	-0.651936	-0.241367	10.2427	0.000161563	0.0760129	0.405955	0.429829	0.484614	0.608356	NA	NA
cg11891735	-1.12226	-0.42886	-0.464739	-0.657521	0.0358795	-0.6934	0.422659	10.2414	0.000161694	0.0760129	0.526753	0.556639	0.585009	0.698912	p	AES
cg06286521	-1.26132	-0.478209	-0.255186	-1.00613	-0.223023	-0.783107	1.15927	10.2406	0.000161776	0.0760129	0.633295	0.640235	0.701876	0.835708	NA	NA
cg00371765	1.27317	0.193811	-0.0745144	1.34769	0.268326	1.07936	2.60723	10.2399	0.000161851	0.0760129	0.872037	0.879424	0.853103	0.758715	NA	NA
cg04123469	-1.4375	-0.175505	0.388717	-1.82622	-0.564222	-1.262	0.819428	10.2394	0.000161906	0.0760129	0.604526	0.545957	0.647697	0.79884	NA	NA
cg13696241	1.48457	0.315916	0.177037	1.30753	0.138879	1.16866	0.797473	10.2381	0.000162039	0.0760129	0.69854	0.591155	0.6169	0.468985	NA	NA
cg05523897	-1.31632	-0.276509	-0.219139	-1.09718	-0.0573707	-1.03981	0.0140566	10.2368	0.000162172	0.0760129	0.461012	0.47292	0.514139	0.652364	NA	NA
cg04644353	1.46035	0.500072	-0.288385	1.74873	0.788457	0.960276	2.08326	10.2367	0.000162187	0.0760129	0.822117	0.850345	0.774122	0.677011	NA	NA
cg17653875	-0.825215	-0.785533	-0.324457	-0.500759	-0.461076	-0.0396826	-1.52743	10.2358	0.000162277	0.0760129	0.207219	0.229038	0.319448	0.333199	NA	NA
cg09873989	-1.13604	-0.212252	0.101151	-1.23719	-0.313404	-0.923784	0.354827	10.2338	0.00016248	0.0760287	0.532678	0.497259	0.570194	0.705455	NA	NA
cg11194708	1.34087	0.345872	0.0986624	1.24221	0.247209	0.995002	2.67605	10.2332	0.000162548	0.0760287	0.881077	0.873711	0.846547	0.771841	NA	NA
cg14459543	-0.876241	-0.62325	-0.115624	-0.760617	-0.507625	-0.252991	-0.686861	10.2304	0.000162838	0.0760287	0.325442	0.354707	0.433819	0.487995	NA	NA
cg21394729	-1.29122	-0.441233	-0.207313	-1.08391	-0.233919	-0.849989	0.426835	10.2294	0.000162935	0.0760287	0.509745	0.588586	0.58356	0.728538	NA	NA
cg24076854	1.50874	0.617689	1.13884	0.369907	-0.521148	0.891055	-2.44414	10.2294	0.000162941	0.0760287	0.20606	0.136443	0.152266	0.0888292	p1	C6orf108
cg16406967	-0.933492	-0.620596	0.0487361	-0.982228	-0.669332	-0.312896	1.80636	10.2284	0.000163037	0.0760287	0.731326	0.740487	0.803292	0.847069	p1	HOXA3
cg10244390	1.29775	0.103964	0.356113	0.94164	-0.252149	1.19379	0.282887	10.2268	0.000163203	0.0760287	0.589605	0.527262	0.545602	0.411646	NA	NA
cg16616070	1.18264	0.585362	0.0385449	1.1441	0.546817	0.597282	1.13691	10.2268	0.000163206	0.0760287	0.737728	0.724818	0.650015	0.522758	NA	NA
cg00558053	0.327187	0.577964	-0.667651	0.994838	1.24562	-0.250777	-4.95017	10.2264	0.000163248	0.0760287	0.0362789	0.052546	0.0236631	0.0321105	p1	SCAMP4
cg02539855	-1.35353	0.316409	1.27398	-2.62751	-0.957575	-1.66994	-2.11378	10.2242	0.000163482	0.0760891	0.20229	0.133805	0.186079	0.360795	p1	LY6H
cg02579816	-1.1507	-0.200898	0.132151	-1.28285	-0.333049	-0.949805	-0.48335	10.2179	0.000164133	0.0761893	0.385664	0.359008	0.422728	0.606519	p1	CST5
cg07275363	1.52041	0.384258	-0.0393525	1.55976	0.42361	1.13615	0.123469	10.2176	0.000164162	0.0761893	0.565724	0.598476	0.505161	0.306064	NA	NA
cg06453019	0.700742	-0.643065	-0.4414	1.14214	-0.201666	1.34381	-1.36145	10.2164	0.000164286	0.0761893	0.262984	0.300306	0.325129	0.213258	NA	NA
cg17745602	-1.25786	-0.4592	0.14104	-1.3989	-0.600241	-0.798663	-1.83557	10.2164	0.000164286	0.0761893	0.189274	0.181509	0.243704	0.352183	p	RARA
cg09927836	1.70243	0.541768	0.520368	1.18206	0.0214002	1.16066	0.608474	10.2162	0.000164307	0.0761893	0.664835	0.602425	0.589658	0.375958	NA	NA
cg10036405	-1.35077	-0.427001	0.0470719	-1.39784	-0.474072	-0.92377	-1.08367	10.2161	0.000164323	0.0761893	0.285526	0.239838	0.342322	0.555364	NA	NA
cg03982787	-0.999625	-0.365097	0.174496	-1.17412	-0.539594	-0.634527	-0.494657	10.2114	0.000164812	0.0763673	0.384745	0.343886	0.443434	0.539755	p	RARA
cg14189890	-1.05807	-0.672034	-0.421485	-0.636583	-0.250549	-0.386035	0.568536	10.2087	0.000165094	0.0764107	0.527235	0.584196	0.614903	0.753477	NA	NA
cg06458557	-1.41062	-0.0117779	0.236516	-1.64713	-0.248294	-1.39884	1.03327	10.2085	0.000165115	0.0764107	0.623603	0.664027	0.677751	0.758677	NA	NA
cg05390356	-1.11788	-0.521843	-0.67725	-0.440634	0.155407	-0.596041	0.169642	10.2031	0.000165689	0.0766281	0.486231	0.513716	0.53772	0.665941	NA	NA
cg01986432	1.35891	0.387162	-0.0526191	1.41153	0.439781	0.97175	1.522	10.2014	0.000165865	0.0766608	0.788933	0.738614	0.718076	0.550025	NA	NA
cg12398332	-1.67671	-0.115024	0.326613	-2.00332	-0.441637	-1.56169	-3.01626	10.199	0.000166122	0.0767309	0.107528	0.0807916	0.112266	0.251292	NA	NA
cg21565942	1.17371	0.0077445	-0.310754	1.48446	0.318499	1.16596	1.42044	10.1974	0.000166286	0.0767583	0.743482	0.752456	0.727268	0.602716	NA	NA
cg07290549	1.22325	0.380022	0.149853	1.0734	0.230169	0.843233	2.9611	10.1944	0.000166605	0.076857	0.906517	0.889061	0.869833	0.819942	NA	NA
cg22455529	-0.911171	-0.55045	-0.508753	-0.402418	-0.0416968	-0.360721	3.39379	10.1925	0.000166812	0.0769037	0.891637	0.915568	0.923218	0.933377	NA	NA
cg16181943	-1.4894	-0.170355	-0.0289799	-1.46042	-0.141375	-1.31905	-1.67797	10.1904	0.000167037	0.0769082	0.213955	0.222278	0.249853	0.378372	NA	NA
cg26951839	-1.39773	-0.292302	0.30037	-1.6981	-0.592673	-1.10543	-0.328083	10.1899	0.000167082	0.0769082	0.414181	0.345418	0.456901	0.655977	NA	NA
cg22216643	-1.31922	-0.26042	-0.29727	-1.02195	0.0368498	-1.0588	0.52265	10.1885	0.000167237	0.0769082	0.540417	0.569926	0.592106	0.740827	NA	NA
cg12280150	-1.08983	0.16521	-0.468043	-0.621787	0.633253	-1.25504	1.9801	10.1878	0.000167311	0.0769082	0.781427	0.832502	0.770038	0.858624	NA	NA
cg25173275	-1.51879	-0.149085	1.30602	-2.8248	-1.4551	-1.3697	-3.62166	10.1863	0.000167469	0.0769082	0.0834231	0.0312425	0.0895258	0.168786	p2	GPAA1
cg04710402	-0.956104	-1.18584	0.174048	-1.13015	-1.35989	0.229736	-2.04987	10.1855	0.000167553	0.0769082	0.161178	0.170079	0.29124	0.332923	NA	NA
cg03373913	1.00467	0.663246	0.257324	0.747342	0.405922	0.341419	1.09573	10.1855	0.000167559	0.0769082	0.72794	0.7137	0.637557	0.575962	NA	NA
cg04454506	-1.76755	0.164656	-0.0759557	-1.69159	0.240612	-1.9322	-3.21925	10.183	0.000167828	0.0769187	0.0945259	0.0847975	0.0839603	0.257398	p	PLA2G7
cg06999417	1.90705	0.0937486	0.122777	1.78428	-0.0290282	1.81331	-0.207792	10.1824	0.00016789	0.0769187	0.519232	0.463908	0.483518	0.23323	NA	NA
cg18221226	-0.627851	-0.698962	-0.374909	-0.252942	-0.324053	0.0711103	-1.16239	10.1823	0.000167898	0.0769187	0.262729	0.28469	0.362626	0.356121	p1	NCOR2
cg20055965	-1.21315	-0.591889	-0.0375493	-1.1756	-0.554339	-0.621265	-0.276314	10.1813	0.000168003	0.0769187	0.397841	0.377318	0.489508	0.646565	NA	NA
cg14817241	1.18787	0.415136	0.572756	0.615114	-0.15762	0.772734	1.58294	10.1794	0.000168207	0.0769328	0.789959	0.724343	0.738059	0.630432	NA	NA
cg20082904	-0.00277754	-0.764066	-1.01095	1.00818	0.246889	0.761288	-0.810681	10.1791	0.000168244	0.0769328	0.316865	0.419867	0.421061	0.296389	p2	TMEM61
cg12871836	1.77202	0.165092	-0.00291937	1.77494	0.168011	1.60693	3.33039	10.1743	0.000168762	0.0771213	0.924461	0.906971	0.906859	0.793331	NA	NA
cg03028000	1.49373	0.256153	-0.0268136	1.52054	0.282966	1.23758	1.32579	10.1732	0.000168879	0.0771263	0.765818	0.674854	0.703684	0.552296	NA	NA
cg07657771	1.31697	0.134125	-0.224606	1.54158	0.358731	1.18285	-0.172975	10.1713	0.00016908	0.0771648	0.511194	0.521814	0.469542	0.275711	NA	NA
cg20114199	0.751594	0.644169	0.436417	0.315178	0.207752	0.107426	2.39884	10.1704	0.000169175	0.0771648	0.870374	0.829014	0.811973	0.767399	NA	NA
cg15717764	1.30659	0.366933	0.396165	0.910428	-0.0292317	0.939659	0.88034	10.1676	0.000169482	0.0771807	0.68218	0.663728	0.656668	0.434352	NA	NA
cg00859858	1.45322	0.414002	0.19616	1.25706	0.217842	1.03922	0.253275	10.1676	0.000169483	0.0771807	0.620776	0.509708	0.523769	0.355992	p	ZC3H12A
cg27217474	-0.980825	-0.494039	0.151871	-1.1327	-0.64591	-0.486786	0.484104	10.1663	0.000169626	0.0771807	0.54412	0.505041	0.602948	0.735418	NA	NA
cg15410236	0.954001	0.699956	0.269582	0.684419	0.430374	0.254045	3.47209	10.1662	0.000169632	0.0771807	0.936304	0.914759	0.892719	0.894127	NA	NA
cg17057783	-1.45293	-0.662726	-0.53119	-0.921741	-0.131536	-0.790205	-2.99172	10.1641	0.000169862	0.0772373	0.0876528	0.135736	0.12873	0.252531	p1	SLC43A1
cg08690378	-1.02956	-0.579244	-0.444019	-0.585537	-0.135225	-0.450312	1.16514	10.1609	0.000170206	0.0773455	0.632012	0.68211	0.723527	0.776498	NA	NA
cg17086320	-1.08703	-0.582149	0.114287	-1.20131	-0.696435	-0.504878	0.515924	10.1578	0.000170545	0.0773927	0.532855	0.508673	0.626791	0.736474	NA	NA
cg08659629	-1.45585	-0.480746	-0.505226	-0.950626	0.0244797	-0.975106	0.905953	10.1578	0.000170546	0.0773927	0.561229	0.691592	0.672344	0.784663	NA	NA
cg23304262	-1.17985	-0.58901	-0.632245	-0.547604	0.0432351	-0.590839	0.38824	10.157	0.000170628	0.0773927	0.503018	0.554842	0.588437	0.720858	NA	NA
cg11800398	-1.46114	-0.517022	-0.163942	-1.29719	-0.35308	-0.944115	-0.0355562	10.1532	0.000171045	0.0774702	0.433365	0.457413	0.533183	0.638825	NA	NA
cg19276668	-1.12807	-0.428247	-0.333507	-0.794559	-0.0947395	-0.69982	-0.27852	10.1531	0.000171059	0.0774702	0.38342	0.479902	0.488243	0.559623	NA	NA
cg02661623	-1.5416	-0.410998	-0.0607241	-1.48087	-0.350274	-1.1306	0.437364	10.1523	0.000171141	0.0774702	0.506813	0.503747	0.588877	0.798717	p2	FLJ23834
cg01856692	-1.31122	-0.271703	0.141818	-1.45304	-0.413521	-1.03952	0.617508	10.1516	0.000171223	0.0774702	0.561411	0.543723	0.615325	0.764895	NA	NA
cg14775247	0.668989	0.707674	0.173144	0.495845	0.53453	-0.0386854	2.30361	10.1496	0.000171438	0.0775001	0.858381	0.85031	0.793668	0.794166	NA	NA
cg02621481	-0.759348	-0.703923	-0.349153	-0.410194	-0.354769	-0.0554251	0.190003	10.149	0.000171502	0.0775001	0.468317	0.508947	0.585451	0.617305	NA	NA
cg25613288	0.318924	0.473592	-0.469203	0.788127	0.942795	-0.154668	0.950964	10.1478	0.00017164	0.0775149	0.690165	0.70982	0.611856	0.595685	NA	NA
cg08162205	-1.17714	-0.662418	-0.183341	-0.993797	-0.479077	-0.51472	0.387744	10.1423	0.000172242	0.0777276	0.492724	0.522495	0.609839	0.7128	NA	NA
cg24384472	-0.829568	-0.309088	0.74639	-1.57596	-1.05548	-0.52048	1.77446	10.1416	0.000172324	0.0777276	0.746963	0.684367	0.803432	0.810894	NA	NA
cg23780021	-1.18287	-0.623943	-0.36862	-0.814254	-0.255323	-0.558931	-0.503933	10.1353	0.000173015	0.077991	0.343256	0.397903	0.455849	0.572447	NA	NA
cg04970516	-1.6069	-0.391094	0.062322	-1.66922	-0.453416	-1.21581	-0.875721	10.1323	0.000173352	0.0780885	0.333826	0.25066	0.381082	0.551863	NA	NA
cg11682700	-1.8781	-0.164635	-0.0581258	-1.81998	-0.10651	-1.71347	0.478788	10.1314	0.000173445	0.0780885	0.515034	0.589833	0.582454	0.743815	p14	ZBTB20
cg08900409	-0.921321	-0.758176	-0.399615	-0.521706	-0.358561	-0.163145	-0.65354	10.1289	0.000173728	0.0781678	0.319313	0.375709	0.454725	0.477548	p	PGPEP1
cg16413076	-1.21862	-0.822369	-0.293711	-0.92491	-0.528658	-0.396252	-1.40804	10.1278	0.000173841	0.0781703	0.221341	0.227732	0.336785	0.391558	NA	NA
cg06362319	0.69189	0.641829	-0.00783535	0.699725	0.649664	0.0500613	1.8573	10.1251	0.000174145	0.0782452	0.818759	0.809659	0.738456	0.71663	NA	NA
cg25108866	-0.926716	-0.384951	0.527426	-1.45414	-0.912378	-0.541764	0.226605	10.1244	0.000174222	0.0782452	0.500219	0.451879	0.580311	0.649865	NA	NA
cg02967377	0.788724	0.802275	0.0158199	0.772904	0.786455	-0.0135505	2.33866	10.1182	0.000174921	0.0785112	0.866427	0.856519	0.791661	0.757974	NA	NA
cg14884895	-0.805591	-0.805539	-0.286372	-0.519219	-0.519167	-5.22512e-05	-0.259904	10.1169	0.000175063	0.0785265	0.386361	0.415742	0.524261	0.541559	p5	VPS13D
cg09052355	-0.239221	-0.757031	-1.03653	0.797313	0.279503	0.51781	2.85829	10.1157	0.000175202	0.0785405	0.847435	0.903483	0.89134	0.884232	NA	NA
cg17715668	1.33591	-0.255596	-0.200962	1.53687	-0.0546341	1.5915	-2.15044	10.1121	0.000175599	0.07867	0.191781	0.199831	0.21371	0.111652	p1	C10orf11
cg23717517	1.65419	0.544843	-0.278849	1.93304	0.823692	1.10935	-0.023749	10.1095	0.000175891	0.0787357	0.588574	0.51847	0.463333	0.261311	NA	NA
cg05347500	-1.29565	-0.444037	-0.218515	-1.07714	-0.225522	-0.851617	-1.21665	10.1089	0.000175961	0.0787357	0.25623	0.283948	0.321655	0.458032	NA	NA
cg03890680	-1.15406	-0.771079	-0.420198	-0.733858	-0.350881	-0.382977	-0.636085	10.1072	0.000176149	0.0787717	0.316447	0.417967	0.465879	0.454973	NA	NA
cg03570045	-1.25767	-0.535185	-0.0798128	-1.17785	-0.455373	-0.72248	1.02874	10.1048	0.000176426	0.0788473	0.624044	0.577525	0.697977	0.805251	p1	PRHOXNB
cg25545260	-1.04222	-0.433436	-0.0878661	-0.954357	-0.34557	-0.608788	-0.447214	10.1021	0.000176724	0.0789319	0.382923	0.392208	0.45732	0.536653	NA	NA
cg21541159	-1.07817	-0.457474	-0.211678	-0.86649	-0.245797	-0.620693	-0.558399	10.0997	0.000176996	0.0789682	0.372227	0.35119	0.415737	0.591478	NA	NA
cg03230364	1.51843	0.159924	-0.651577	2.17	0.811501	1.3585	1.9113	10.0995	0.000177021	0.0789682	0.805188	0.849191	0.7803	0.600528	NA	NA
cg13185188	1.4136	0.068236	-0.398043	1.81164	0.466279	1.34536	-0.273726	10.094	0.000177652	0.0791617	0.484245	0.493756	0.459726	0.295128	NA	NA
cg24822696	-2.26023	-1.75345	-0.72989	-1.53034	-1.02357	-0.506778	-3.33	10.0938	0.000177672	0.0791617	0.0518886	0.133807	0.178489	0.173327	p1	STL
cg21757951	1.40251	0.561288	-0.0261709	1.42868	0.587459	0.841223	-1.38579	10.0919	0.000177883	0.0792017	0.34708	0.325072	0.267623	0.141231	NA	NA
cg17861295	-1.37872	-0.0554267	0.222917	-1.60164	-0.278343	-1.32329	-1.25748	10.0899	0.000178114	0.0792017	0.262628	0.319576	0.30471	0.425463	p1	ZNF879
cg11408480	-1.53756	-0.471547	0.0528037	-1.59036	-0.524351	-1.06601	1.33872	10.0889	0.000178225	0.0792017	0.653114	0.660463	0.742717	0.845436	NA	NA
cg21703994	-1.36131	-0.432809	0.0373499	-1.39866	-0.470159	-0.928503	0.671932	10.088	0.000178335	0.0792017	0.561863	0.524927	0.623158	0.813063	NA	NA
cg06555521	0.674084	-0.702731	0.0190546	0.655029	-0.721785	1.37681	0.55976	10.0875	0.00017839	0.0792017	0.56806	0.569293	0.670348	0.457018	NA	NA
cg24352662	-1.66135	0.157808	0.160056	-1.82141	-0.00224808	-1.81916	1.22742	10.0873	0.000178412	0.0792017	0.677754	0.669901	0.668063	0.828322	NA	NA
cg00340179	-1.39676	-0.41078	-0.380153	-1.01661	-0.0306271	-0.985984	-0.307816	10.0856	0.000178613	0.0792105	0.384999	0.445279	0.465168	0.64678	p	FAM13A
cg09972205	-1.91778	-0.225681	-0.097113	-1.82067	-0.128568	-1.6921	-3.72151	10.0851	0.000178659	0.0792105	0.0615892	0.0672195	0.0674753	0.224169	p1	ZFP14
cg12997242	-1.24398	-0.282507	-0.281502	-0.962475	-0.00100478	-0.96147	0.2643	10.0841	0.000178779	0.0792105	0.496359	0.573187	0.555231	0.638189	p1	C8orf22
cg21759811	0.352964	-0.665759	0.376804	-0.0238392	-1.04256	1.01872	-3.58494	10.083	0.000178906	0.0792105	0.0767232	0.0509311	0.0994338	0.0756996	p1	FAM174A
cg01873690	-1.16991	-0.0993006	-0.11053	-1.05938	0.0112295	-1.0706	2.31247	10.0824	0.000178975	0.0792105	0.794064	0.851096	0.822082	0.874626	NA	NA
cg14417655	1.19782	0.518743	0.274233	0.92359	0.24451	0.67908	1.63515	10.0793	0.000179331	0.0792772	0.80004	0.758547	0.727212	0.623982	NA	NA
cg26293014	1.10887	0.832006	0.867969	0.240903	-0.0359637	0.276867	1.47253	10.0789	0.000179378	0.0792772	0.807352	0.648942	0.682298	0.649315	NA	NA
cg26799602	0.341421	-0.752757	-0.271122	0.612543	-0.481635	1.09418	0.0959563	10.0783	0.000179451	0.0792772	0.478998	0.480662	0.587819	0.461291	NA	NA
cg05848001	-1.1524	-0.497934	-0.540299	-0.612097	0.042365	-0.654462	1.82702	10.0756	0.000179751	0.0793038	0.72637	0.770781	0.7886	0.847351	NA	NA
cg11606570	1.6227	0.572994	0.14468	1.47802	0.428313	1.04971	2.02127	10.0754	0.000179783	0.0793038	0.837353	0.810986	0.779852	0.653279	NA	NA
cg02898721	-1.28447	-0.579484	-0.337257	-0.947217	-0.242227	-0.70499	0.0439317	10.0748	0.000179847	0.0793038	0.440899	0.481619	0.529252	0.705095	NA	NA
cg02562604	1.11335	0.369608	0.0916022	1.02175	0.278006	0.743739	1.68978	10.074	0.000179945	0.0793038	0.798591	0.770933	0.744737	0.640338	NA	NA
cg05351767	0.672825	0.701866	0.528288	0.144538	0.173578	-0.0290402	2.50589	10.0703	0.000180363	0.0794401	0.879329	0.846443	0.823099	0.800178	NA	NA
cg13016035	-0.272716	-0.727045	0.114807	-0.387524	-0.841853	0.454329	0.868511	10.0677	0.000180669	0.0795245	0.594139	0.57027	0.686802	0.725603	NA	NA
cg08714341	1.2184	0.671986	0.781241	0.437164	-0.109255	0.546418	1.72186	10.0655	0.000180924	0.0795245	0.821272	0.714511	0.741769	0.645536	NA	NA
cg11678427	-1.02109	-0.533555	-0.30332	-0.717765	-0.230235	-0.487531	-1.35035	10.0654	0.000180932	0.0795245	0.236695	0.27417	0.31196	0.395409	NA	NA
cg23524300	-1.4556	-0.540324	-0.204383	-1.25122	-0.335941	-0.915279	-0.481474	10.0636	0.000181142	0.0795245	0.367817	0.329844	0.454656	0.614968	NA	NA
cg13064571	1.37637	0.264812	-0.202674	1.57904	0.467487	1.11155	0.0360388	10.0633	0.000181184	0.0795245	0.556812	0.54008	0.48283	0.358442	NA	NA
cg10099518	0.957696	0.774731	0.293876	0.663821	0.480855	0.182966	4.30792	10.0631	0.000181209	0.0795245	0.962599	0.951596	0.939417	0.928214	NA	NA
cg27048597	-1.11616	-0.788764	-0.351816	-0.76434	-0.436948	-0.327392	-0.2268	10.0614	0.000181403	0.0795621	0.412191	0.380534	0.508946	0.603833	NA	NA
cg24494802	1.22843	0.0366884	-0.107116	1.33554	0.143805	1.19174	1.21185	10.0576	0.000181843	0.0797072	0.709608	0.756941	0.712274	0.489987	p	ZFYVE28
cg02800711	1.5237	0.0497275	-0.190151	1.71385	0.239879	1.47398	3.7365	10.0554	0.000182096	0.0797276	0.938699	0.93489	0.92737	0.860404	NA	NA
cg09923648	1.08322	0.312924	-0.0417804	1.125	0.354704	0.770294	1.1811	10.0553	0.000182108	0.0797276	0.72523	0.713226	0.687491	0.541281	NA	NA
cg11014582	-1.33816	-0.594538	-0.127044	-1.21112	-0.467494	-0.743626	1.29743	10.0507	0.000182655	0.0799163	0.648104	0.657555	0.737624	0.837601	NA	NA
cg21851032	-1.44636	-0.368425	-0.2364	-1.20996	-0.132025	-1.07793	1.70303	10.0498	0.000182758	0.0799163	0.707143	0.76694	0.758518	0.889953	NA	NA
cg08717672	1.23096	0.712542	-0.30889	1.53985	1.02143	0.518416	0.488995	10.0477	0.000183001	0.0799586	0.641796	0.667266	0.533445	0.392297	NA	NA
cg13041009	0.8187	0.60157	0.850279	-0.0315783	-0.248708	0.21713	2.17124	10.0471	0.000183074	0.0799586	0.853297	0.780787	0.79814	0.771842	NA	NA
cg04625862	0.929464	0.582733	0.370706	0.558757	0.212027	0.346731	0.967557	10.0436	0.000183486	0.0800908	0.708969	0.676653	0.629088	0.544749	NA	NA
cg15981087	-1.53142	-0.467939	0.254064	-1.78548	-0.722002	-1.06348	0.452471	10.0389	0.000184046	0.0802873	0.528856	0.460939	0.593339	0.792503	NA	NA
cg26840770	-1.00437	-0.00309827	-0.795057	-0.209317	0.791958	-1.00128	-2.28903	10.0377	0.000184186	0.0803003	0.158133	0.22742	0.15375	0.276472	p3	BDNF
cg05684054	1.17174	0.377338	0.509622	0.662123	-0.132284	0.794407	2.3405	10.0336	0.00018467	0.0804635	0.862671	0.826498	0.826423	0.727247	NA	NA
cg24898784	1.05107	-0.271494	-0.285392	1.33646	0.0138982	1.32256	0.729722	10.0296	0.00018514	0.0806199	0.62069	0.653866	0.637038	0.500554	NA	NA
cg00103448	-0.920314	0.392717	0.0307304	-0.951044	0.361986	-1.31303	1.66358	10.0282	0.000185311	0.080639	0.766758	0.75638	0.717678	0.840617	NA	NA
cg23987137	-1.32039	-0.705029	-0.493322	-0.827069	-0.211707	-0.615363	-0.444451	10.0269	0.000185465	0.080639	0.350084	0.385623	0.466695	0.613555	NA	NA
cg16842654	1.27551	0.274162	0.220987	1.05453	0.0531753	1.00135	2.28905	10.0265	0.000185515	0.080639	0.854034	0.830136	0.826851	0.70916	NA	NA
cg08718220	-0.91288	-0.551646	-0.965302	0.0524217	0.413656	-0.361234	1.83448	10.0224	0.000185999	0.0808013	0.700741	0.851369	0.796527	0.829849	p10	SYNE2
cg08945331	-0.855196	-0.576251	-0.220009	-0.635187	-0.356241	-0.278945	-0.671127	10.0189	0.000186427	0.0809391	0.341045	0.342505	0.419807	0.518151	NA	NA
cg18110428	1.26318	0.427771	0.33105	0.932129	0.0967215	0.835408	1.31582	10.0175	0.000186587	0.0809603	0.763595	0.688002	0.693761	0.565649	NA	NA
cg13276704	-1.2002	-0.330235	0.0959173	-1.29612	-0.426152	-0.869967	-0.246705	10.0123	0.000187212	0.0811835	0.411392	0.410381	0.471904	0.644783	NA	NA
cg02211646	-0.887833	-0.585396	-0.270675	-0.617158	-0.31472	-0.302437	-0.384653	10.0077	0.000187777	0.0813444	0.376841	0.412386	0.460302	0.602457	p7	FOXP2
cg18279994	-0.258512	-1.01754	-0.760203	0.501691	-0.257339	0.75903	-3.86922	10.0074	0.000187806	0.0813444	0.0562459	0.0624831	0.0865746	0.0680648	p1	EML6
cg20497091	-1.32092	-0.778667	-0.78868	-0.532239	0.0100127	-0.542252	-1.11111	10.0039	0.000188237	0.0814827	0.251722	0.326579	0.352847	0.490005	p1	GDPD3
cg03038003	-1.16597	0.387312	0.257686	-1.42366	0.129626	-1.55329	-3.0242	10.0026	0.000188384	0.081498	0.118009	0.100051	0.0966635	0.199736	NA	NA
cg23567142	-1.08345	-0.834117	-0.508812	-0.574643	-0.325305	-0.249337	0.165156	10.0005	0.000188648	0.081564	0.449746	0.489961	0.576388	0.682926	p	STXBP1
cg06096208	-1.29891	-0.377632	-0.3766	-0.922307	-0.00103162	-0.921276	0.0836154	9.9992	0.000188802	0.0815824	0.443435	0.54766	0.540596	0.637596	NA	NA
cg12221621	-1.37032	-0.46255	0.21235	-1.58267	-0.674901	-0.907771	1.48062	9.99596	0.000189196	0.0816587	0.699546	0.600667	0.756752	0.868642	NA	NA
cg06113917	-1.03503	-0.678423	-0.489264	-0.54577	-0.189158	-0.356611	-1.20354	9.99591	0.000189203	0.0816587	0.254969	0.290253	0.349309	0.381991	NA	NA
cg26967723	1.10155	-0.362606	-0.875498	1.97705	0.512892	1.46416	1.29286	9.99034	0.000189883	0.0818958	0.679979	0.797992	0.73358	0.552101	NA	NA
cg02197034	-0.847769	-0.81566	0.118192	-0.965961	-0.933852	-0.0321096	-1.79231	9.98957	0.000189976	0.0818958	0.187232	0.180206	0.293987	0.261469	p2	ITGA1
cg08034440	-1.65712	-0.0891099	0.286629	-1.94375	-0.375739	-1.56801	-2.282	9.98422	0.000190633	0.082094	0.139884	0.222704	0.184115	0.33852	NA	NA
cg16721191	-0.830103	-1.30732	-0.868004	0.037901	-0.439315	0.477216	-2.2968	9.98259	0.000190833	0.082094	0.120552	0.200305	0.253086	0.23043	p1	HMCN1
cg08244518	-1.68257	-0.226636	0.299695	-1.98226	-0.526331	-1.45593	0.818243	9.98148	0.000190969	0.082094	0.608285	0.505516	0.628463	0.842507	NA	NA
cg05578055	-0.443278	-1.1414	-0.579192	0.135914	-0.56221	0.698124	-3.39588	9.98061	0.000191077	0.082094	0.0627131	0.0956924	0.122265	0.119006	NA	NA
cg26166177	-0.0319528	0.837153	1.01357	-1.04552	-0.176415	-0.869106	1.79562	9.98034	0.000191109	0.082094	0.807538	0.740619	0.733024	0.786473	NA	NA
cg13853365	-1.09571	-0.244352	0.608668	-1.70438	-0.853019	-0.851361	1.18934	9.98034	0.00019111	0.082094	0.659649	0.626831	0.714756	0.77824	NA	NA
cg13260793	-1.14756	-0.408729	-0.677674	-0.469884	0.268945	-0.738828	3.06121	9.97893	0.000191284	0.082111	0.867027	0.904534	0.886333	0.936223	NA	NA
cg21760537	-1.16643	-0.72133	0.0168802	-1.18331	-0.73821	-0.445098	0.53076	9.97735	0.000191478	0.082111	0.518033	0.51471	0.647025	0.724585	p	APBB2
cg09106646	-1.32973	-0.529434	-0.133959	-1.19577	-0.395476	-0.800292	-1.07435	9.97728	0.000191487	0.082111	0.274137	0.262979	0.362641	0.485016	NA	NA
cg09675215	-1.27019	-0.433896	0.264224	-1.53442	-0.69812	-0.836297	1.53339	9.97451	0.00019183	0.0821316	0.675406	0.722853	0.764727	0.841259	NA	NA
cg01980817	0.83937	0.552966	0.288875	0.550495	0.264091	0.286403	2.00385	9.97414	0.000191875	0.0821316	0.830431	0.816613	0.773579	0.729401	NA	NA
cg17027476	-1.44749	-0.705974	-0.23703	-1.21046	-0.468945	-0.74152	0.421978	9.97337	0.000191971	0.0821316	0.50613	0.520774	0.61577	0.712723	NA	NA
cg21045147	-1.43274	-0.22713	0.397297	-1.83003	-0.624427	-1.20561	1.07515	9.97325	0.000191985	0.0821316	0.623239	0.631072	0.681419	0.828593	NA	NA
cg20712631	-1.16207	-0.370837	-0.0527665	-1.10931	-0.318071	-0.791236	-0.393017	9.97139	0.000192215	0.0821765	0.38699	0.406842	0.453186	0.580354	NA	NA
cg14051662	-0.762118	-1.03114	-0.690015	-0.0721029	-0.341124	0.269021	0.185235	9.97028	0.000192353	0.0821765	0.449682	0.514057	0.587227	0.653322	NA	NA
cg20540235	-1.27922	-0.692089	-0.0354279	-1.24379	-0.656661	-0.587128	-0.120317	9.96968	0.000192428	0.0821765	0.410307	0.427703	0.532426	0.635175	NA	NA
cg02518591	-1.10184	-0.643303	-0.150047	-0.951791	-0.493256	-0.458535	0.212977	9.96735	0.000192717	0.0822424	0.479188	0.461266	0.580921	0.685956	NA	NA
cg16908123	-0.543845	-0.633504	-0.27263	-0.271215	-0.360875	0.0896594	-1.56486	9.96525	0.000192978	0.0822424	0.214243	0.240381	0.295366	0.328753	NA	NA
cg13363808	1.37508	0.422885	0.498256	0.87682	-0.0753718	0.952192	1.52038	9.96514	0.000192992	0.0822424	0.770054	0.745237	0.735447	0.553819	NA	NA
cg13141812	-1.52959	-0.238145	-0.185922	-1.34367	-0.0522233	-1.29145	0.503449	9.96405	0.000193128	0.0822424	0.529509	0.557953	0.586879	0.770756	NA	NA
cg10526325	-1.10025	-0.565084	-0.0652407	-1.03501	-0.499843	-0.535168	-0.517237	9.96391	0.000193145	0.0822424	0.358035	0.345226	0.460497	0.555158	NA	NA
cg22127075	-1.04684	-0.173638	0.148199	-1.19503	-0.321837	-0.873198	0.826658	9.96177	0.000193412	0.0822701	0.618654	0.560723	0.651185	0.750368	NA	NA
cg17185052	-1.03656	-0.587938	-0.607928	-0.428632	0.01999	-0.448622	2.97128	9.95978	0.000193661	0.0822701	0.848216	0.8886	0.898406	0.926244	NA	NA
cg13318256	-1.15754	-0.648744	-0.347585	-0.809951	-0.301159	-0.508791	0.797841	9.9579	0.000193896	0.0822701	0.568455	0.595425	0.655002	0.786411	NA	NA
cg07805967	0.364991	-0.943914	-0.344455	0.709446	-0.599459	1.3089	-2.68478	9.9573	0.000193972	0.0822701	0.119364	0.140949	0.174868	0.133478	p1	CSTF2T
cg07748712	1.21114	0.428835	-0.225905	1.43704	0.654739	0.782302	1.39684	9.9566	0.000194059	0.0822701	0.767137	0.756138	0.690603	0.580732	NA	NA
cg14711108	-1.24445	-0.704458	-0.761009	-0.483445	0.0565506	-0.539995	-0.114574	9.95597	0.000194137	0.0822701	0.41191	0.469553	0.51074	0.641895	NA	NA
cg25489477	0.596962	0.435504	-0.296092	0.893055	0.731596	0.161458	1.01966	9.95548	0.0001942	0.0822701	0.700755	0.717146	0.632634	0.580737	NA	NA
cg06264615	0.896271	0.0499162	-0.577489	1.47376	0.627405	0.846355	2.0235	9.9532	0.000194484	0.0822701	0.798655	0.859199	0.794128	0.713341	NA	NA
cg20817975	-0.928814	-0.650127	-0.246322	-0.682492	-0.403805	-0.278687	-0.72069	9.95315	0.000194491	0.0822701	0.32616	0.340686	0.427061	0.481679	NA	NA
cg26956141	0.993695	0.499962	0.089933	0.903762	0.410029	0.493733	-1.4435	9.95301	0.000194509	0.0822701	0.322033	0.260949	0.237443	0.277492	p1	LOC101927851
cg02565730	0.439228	0.981029	0.86958	-0.430352	0.111449	-0.541801	-3.07251	9.95206	0.000194629	0.0822701	0.149045	0.0865467	0.0836821	0.111215	p1,p5	COQ6,FAM161B
cg25180248	-1.30059	-0.598527	-0.484187	-0.816406	-0.11434	-0.702066	0.295298	9.95091	0.000194773	0.0822701	0.487431	0.546437	0.559492	0.732142	NA	NA
cg16209364	-1.22725	-0.542014	-0.0807483	-1.1465	-0.461266	-0.685233	0.579107	9.95088	0.000194777	0.0822701	0.543298	0.554322	0.619666	0.741035	NA	NA
cg06930016	-0.936641	-0.67988	-0.594077	-0.342564	-0.0858029	-0.256761	0.388333	9.95079	0.000194788	0.0822701	0.497204	0.562434	0.598972	0.69897	NA	NA
cg10438110	1.39337	0.710076	0.678014	0.71536	0.0320618	0.683298	-1.03364	9.94838	0.000195091	0.0823113	0.418689	0.30395	0.310294	0.194562	NA	NA
cg02516134	-1.15852	-0.325945	-0.2444	-0.91412	-0.0815452	-0.832575	1.74087	9.94823	0.000195111	0.0823113	0.724661	0.769542	0.778842	0.85285	NA	NA
cg02793494	-1.09883	0.108069	0.143268	-1.24209	-0.0351996	-1.20689	-0.590462	9.94454	0.000195575	0.0824423	0.400341	0.355264	0.380422	0.538396	NA	NA
cg08662826	-0.726609	-0.754555	-0.0468894	-0.67972	-0.707666	0.0279459	-0.609398	9.94397	0.000195647	0.0824423	0.349571	0.296171	0.460915	0.515849	NA	NA
cg03466765	1.38871	0.3556	-0.0445762	1.43329	0.400177	1.03311	1.9344	9.94217	0.000195875	0.0824908	0.81928	0.836651	0.772414	0.625439	NA	NA
cg09552242	-1.4129	-0.297945	-0.0959439	-1.31695	-0.202001	-1.11495	0.373727	9.94013	0.000196133	0.0825518	0.510049	0.525453	0.574061	0.743288	NA	NA
cg20324147	1.20158	0.948485	1.10719	0.0943909	-0.158701	0.253091	1.70587	9.93729	0.000196494	0.0826534	0.82111	0.719549	0.711121	0.678163	NA	NA
cg10081086	1.25797	0.23165	0.597343	0.660623	-0.365692	1.02632	2.25958	9.93645	0.000196601	0.0826534	0.859762	0.784751	0.824257	0.703635	NA	NA
cg04682832	-1.35089	-0.510738	-0.494449	-0.856444	-0.0162885	-0.840155	1.47034	9.93512	0.000196769	0.0826764	0.673232	0.733622	0.748405	0.848858	NA	NA
cg14415629	1.32738	0.101074	-0.27788	1.60526	0.378953	1.22631	0.0528637	9.93341	0.000196987	0.0826798	0.544586	0.548023	0.5202	0.293775	NA	NA
cg16203203	-1.16158	-0.596678	-0.214631	-0.946951	-0.382047	-0.564904	-1.58586	9.93328	0.000197003	0.0826798	0.204499	0.23085	0.286024	0.381354	p1	STL
cg00179026	1.3871	0.588962	0.122463	1.26463	0.466499	0.798134	2.43244	9.93043	0.000197366	0.0827403	0.878516	0.853589	0.812496	0.72827	NA	NA
cg10806175	1.15696	0.402224	-0.0471769	1.20413	0.449401	0.754733	1.37498	9.92674	0.000197837	0.0827403	0.761231	0.744496	0.694865	0.59297	NA	NA
cg27164337	-1.11823	-0.525809	-0.069373	-1.04886	-0.456436	-0.59242	-0.709912	9.92599	0.000197934	0.0827403	0.320932	0.355005	0.417786	0.53611	NA	NA
cg02825478	-1.58315	-0.0160889	-0.523243	-1.0599	0.507154	-1.56706	0.849514	9.92391	0.000198201	0.0827403	0.591586	0.653147	0.623334	0.789	NA	NA
cg18795525	1.52163	0.557956	0.170436	1.35119	0.38752	0.963673	0.191348	9.9238	0.000198215	0.0827403	0.602519	0.56689	0.499389	0.320471	NA	NA
cg16132610	-0.87925	-0.672469	0.10583	-0.98508	-0.778299	-0.206781	0.438351	9.92301	0.000198315	0.0827403	0.523137	0.471407	0.624155	0.714334	NA	NA
cg19996304	-1.60233	-0.414755	-0.272037	-1.33029	-0.142717	-1.18757	1.03358	9.92264	0.000198362	0.0827403	0.58944	0.681452	0.683452	0.805245	NA	NA
cg20447066	0.666999	0.709341	0.278754	0.388245	0.430587	-0.0423418	2.40666	9.92263	0.000198364	0.0827403	0.868225	0.849464	0.810856	0.803011	NA	NA
cg01583716	-1.64389	0.0356151	0.171511	-1.8154	-0.135896	-1.67951	-1.97001	9.92258	0.000198371	0.0827403	0.190848	0.169784	0.199203	0.402249	NA	NA
cg06979604	-1.21417	-0.422937	-0.129861	-1.08431	-0.293076	-0.791236	0.931728	9.92224	0.000198414	0.0827403	0.611761	0.617893	0.669181	0.783804	NA	NA
cg00882835	-1.02365	0.20251	0.292386	-1.31604	-0.0898754	-1.22616	2.65675	9.92171	0.000198482	0.0827403	0.85649	0.850299	0.853149	0.910735	NA	NA
cg03260530	-1.08799	-0.421415	0.177593	-1.26558	-0.599008	-0.666576	0.301865	9.92152	0.000198507	0.0827403	0.503429	0.50171	0.579653	0.685975	NA	NA
cg09690040	-1.2406	-0.276226	0.048909	-1.28951	-0.325135	-0.964375	0.428362	9.9196	0.000198753	0.0827957	0.530501	0.543538	0.570018	0.744285	NA	NA
cg08248579	-0.740096	-0.742515	-0.543003	-0.197094	-0.199512	0.00241826	-0.174083	9.91698	0.00019909	0.0828167	0.401011	0.453901	0.516765	0.5969	NA	NA
cg07310873	-1.02251	-0.619231	-0.184085	-0.838429	-0.435146	-0.403283	-1.28815	9.91677	0.000199118	0.0828167	0.247541	0.255424	0.331809	0.405147	NA	NA
cg25191704	1.50607	0.0970308	-0.25708	1.76315	0.354111	1.40904	3.01909	9.91649	0.000199154	0.0828167	0.895438	0.918378	0.88864	0.771014	NA	NA
cg26360429	-1.07761	-0.524154	-0.136859	-0.94075	-0.387295	-0.553455	-0.768523	9.91568	0.000199257	0.0828167	0.311183	0.344376	0.413925	0.508898	p1	ENST00000456777
cg15871766	0.999535	0.338441	0.609875	0.38966	-0.271434	0.661094	0.446486	9.91328	0.000199568	0.0828774	0.643351	0.475273	0.571707	0.463328	NA	NA
cg10566933	-1.19522	-0.67525	-0.322988	-0.872236	-0.352262	-0.519974	-1.32252	9.91212	0.000199717	0.0828774	0.237353	0.252909	0.328493	0.421066	NA	NA
cg11164865	1.20799	-0.147696	-0.682929	1.89092	0.535234	1.35569	-0.112182	9.91191	0.000199744	0.0828774	0.501727	0.545078	0.486646	0.309833	NA	NA
cg11790706	-1.23366	0.0697708	0.435431	-1.66909	-0.36566	-1.30343	0.0432779	9.90951	0.000200055	0.0829322	0.498733	0.433815	0.495984	0.665611	NA	NA
cg21703462	-1.32588	-0.517925	-0.0244625	-1.30142	-0.493463	-0.80796	1.04955	9.90772	0.000200287	0.0829322	0.617749	0.600622	0.68374	0.849673	p4	ACOT2
cg17093539	-1.35561	-0.309436	0.122374	-1.47798	-0.431809	-1.04618	-0.361674	9.90543	0.000200583	0.0829322	0.407957	0.357428	0.464868	0.585119	p3	GAB1
cg04144222	-1.24354	-0.396735	0.204168	-1.44771	-0.600903	-0.846804	0.849681	9.90508	0.000200629	0.0829322	0.588777	0.564091	0.668794	0.793964	p	ANXA9
cg16357353	0.845661	0.638821	0.27784	0.567821	0.360981	0.206839	0.856173	9.90456	0.000200696	0.0829322	0.696833	0.662755	0.59456	0.557394	NA	NA
cg25655489	-1.12601	-0.564016	0.136345	-1.26235	-0.700361	-0.56199	0.281092	9.90442	0.000200714	0.0829322	0.505208	0.466598	0.583005	0.662167	NA	NA
cg23259375	-1.03544	0.115816	-0.131771	-0.903672	0.247588	-1.15126	1.93921	9.90369	0.00020081	0.0829322	0.771975	0.782947	0.774821	0.859904	NA	NA
cg24675673	-1.13688	0.385664	0.576973	-1.71385	-0.191309	-1.52254	2.43796	9.90348	0.000200837	0.0829322	0.834507	0.823306	0.828956	0.877295	NA	NA
cg17566946	1.49176	0.214699	-0.0308343	1.52259	0.245533	1.27706	0.517775	9.90267	0.000200942	0.0829322	0.64365	0.57804	0.582619	0.399145	NA	NA
cg16359643	-1.38792	-0.575789	-0.161219	-1.2267	-0.41457	-0.812134	0.331163	9.90214	0.000201011	0.0829322	0.499779	0.480686	0.578147	0.763855	NA	NA
cg07381013	-1.59787	-0.68851	0.0729368	-1.6708	-0.761446	-0.909357	0.47941	9.89934	0.000201376	0.0829671	0.511436	0.483781	0.633208	0.754061	NA	NA
cg27518279	-2.02192	-0.966252	-0.442196	-1.57972	-0.524055	-1.05567	-1.66824	9.89877	0.00020145	0.0829671	0.181369	0.276228	0.334349	0.424843	p2	TFAP2C
cg20973598	1.31458	0.268884	-0.489812	1.80439	0.758696	1.0457	0.895594	9.89753	0.000201612	0.0829671	0.690424	0.680986	0.613059	0.51297	p	ABCG1
cg00478886	0.946368	-0.356058	-0.540595	1.48696	0.184537	1.30243	1.56367	9.89744	0.000201624	0.0829671	0.738797	0.764757	0.757279	0.648889	NA	NA
cg25522143	0.889222	0.740458	0.468813	0.420409	0.271645	0.148764	0.18517	9.89713	0.000201664	0.0829671	0.598232	0.541025	0.488883	0.400428	NA	NA
cg10873188	-1.50175	0.0566355	0.80985	-2.3116	-0.753215	-1.55839	2.49143	9.89593	0.00020182	0.0829699	0.817587	0.809861	0.845681	0.90545	p1,p1	DAB1-AS1,DAB1
cg27338793	1.22326	0.106789	0.125129	1.09813	-0.0183399	1.11647	-0.471077	9.89495	0.000201948	0.0829699	0.466512	0.399677	0.430221	0.263353	NA	NA
cg18714398	-0.886298	-0.709368	-0.494298	-0.392	-0.215071	-0.17693	0.219215	9.89447	0.000202012	0.0829699	0.474502	0.504753	0.57305	0.679635	NA	NA
cg22575300	0.637942	0.799557	0.158873	0.479069	0.640683	-0.161614	2.61593	9.89167	0.000202379	0.0830178	0.885007	0.874742	0.820496	0.828544	NA	NA
cg15142116	-1.81381	-0.387445	0.110326	-1.92414	-0.497772	-1.42637	1.20745	9.89105	0.00020246	0.0830178	0.641188	0.627485	0.696921	0.875373	NA	NA
cg10902905	-1.45293	-0.30847	0.0448722	-1.49781	-0.353342	-1.14446	0.586676	9.89097	0.00020247	0.0830178	0.549966	0.543769	0.611254	0.780416	p5	LRRN4
cg10978799	1.26168	0.167096	-0.112787	1.37447	0.279884	1.09458	0.993823	9.88966	0.000202642	0.0830214	0.693309	0.706393	0.661705	0.493903	p1	IL10
cg18326610	-1.30944	0.11486	-0.121373	-1.18807	0.236233	-1.4243	-3.04414	9.88906	0.000202721	0.0830214	0.104886	0.119069	0.105608	0.205438	NA	NA
cg05894124	-1.48362	-0.135842	0.246136	-1.72975	-0.381978	-1.34777	-1.89401	9.88831	0.000202819	0.0830214	0.190772	0.184082	0.215842	0.383818	NA	NA
cg01556275	-0.783739	-0.717105	-0.145245	-0.638494	-0.57186	-0.0666342	-0.230075	9.88645	0.000203064	0.08304	0.385511	0.441341	0.52695	0.546459	NA	NA
cg05704952	1.21606	0.869907	0.363468	0.852587	0.506439	0.346148	1.38945	9.88623	0.000203092	0.08304	0.776405	0.752832	0.665777	0.572316	NA	NA
cg21546522	-1.53387	0.0983268	-0.327805	-1.20606	0.426131	-1.63219	0.469952	9.8852	0.000203228	0.083049	0.553832	0.552464	0.524727	0.796696	p1,p1	ENST00000421207,LOC100506795
cg13276633	0.982256	-0.0350286	-0.314518	1.29677	0.279489	1.01728	0.50682	9.88227	0.000203614	0.0831605	0.601446	0.617156	0.583629	0.486909	NA	NA
cg14322570	-1.10029	-0.718513	-0.101617	-0.998671	-0.616896	-0.381774	1.62591	9.87897	0.000204049	0.083259	0.685379	0.691026	0.777182	0.855856	NA	NA
cg05198461	-1.52508	-0.159726	0.200471	-1.72555	-0.360198	-1.36535	2.06547	9.87871	0.000204084	0.083259	0.77647	0.754545	0.791657	0.920997	NA	NA
cg11155432	-1.58021	-0.805537	-0.581501	-0.998709	-0.224037	-0.774672	-0.935619	9.8762	0.000204417	0.0833485	0.281511	0.352208	0.374406	0.54167	p1	CDH9
cg17653203	1.16432	0.0888304	-0.109849	1.27417	0.198679	1.07549	1.98906	9.87258	0.000204897	0.083462	0.811904	0.816722	0.799718	0.658434	NA	NA
cg01650747	-1.16439	-0.472314	-0.163253	-1.00114	-0.309061	-0.692075	-0.884997	9.87237	0.000204924	0.083462	0.307897	0.30554	0.376684	0.522402	NA	NA
cg22246446	-1.25739	-0.193864	-0.438356	-0.819033	0.244492	-1.06352	1.19023	9.86945	0.000205314	0.0835259	0.651444	0.707515	0.685547	0.786273	p26	TNS1
cg24018814	1.02077	0.679698	0.547838	0.47293	0.13186	0.341071	1.98299	9.86936	0.000205325	0.0835259	0.838745	0.783217	0.765279	0.713648	NA	NA
cg00356723	1.67615	-0.17768	-0.40345	2.0796	0.22577	1.85383	-2.81893	9.86815	0.000205487	0.0835259	0.135801	0.167077	0.146595	0.0644189	NA	NA
cg00898920	1.28157	0.490532	0.34556	0.936011	0.144972	0.791039	1.33448	9.86679	0.000205667	0.0835259	0.759922	0.70605	0.695483	0.587652	p19	RNPEPL1
cg23448998	-1.07429	-0.342282	0.055146	-1.12944	-0.397428	-0.732008	-0.308753	9.8658	0.000205799	0.0835259	0.410361	0.388504	0.471595	0.585342	NA	NA
cg25836133	1.19285	0.495043	0.0786327	1.11422	0.41641	0.69781	1.92254	9.86559	0.000205828	0.0835259	0.825771	0.806743	0.765637	0.66439	NA	NA
cg14708398	-0.992166	-0.830699	-0.180313	-0.811853	-0.650385	-0.161467	0.105942	9.86519	0.000205882	0.0835259	0.442839	0.452412	0.585444	0.647202	NA	NA
cg23637124	-2.04512	-0.286277	-0.252082	-1.79303	-0.0341948	-1.75884	-2.73987	9.86238	0.000206256	0.0836314	0.110702	0.184551	0.127564	0.351602	p3	SHC4
cg13070193	-1.42008	0.258229	0.342303	-1.76238	-0.0840736	-1.67831	-2.25539	9.86061	0.000206494	0.0836812	0.154849	0.228141	0.162841	0.344229	p1	ADCY1
cg00849854	-1.0429	-0.520037	-0.633443	-0.409453	0.113406	-0.522859	0.360632	9.85878	0.000206739	0.08369	0.501018	0.579499	0.584634	0.672271	NA	NA
cg16701694	-1.41344	-0.128772	-0.334659	-1.07879	0.205887	-1.28467	1.69144	9.85874	0.000206745	0.08369	0.727463	0.761654	0.743852	0.886755	NA	NA
cg00533206	1.26163	0.634884	0.402309	0.859317	0.232575	0.626742	1.82429	9.85764	0.000206891	0.083703	0.825043	0.78128	0.750121	0.639807	NA	NA
cg19880790	-0.919475	-0.650618	-0.0634575	-0.856017	-0.58716	-0.268857	-0.51389	9.85631	0.000207071	0.0837291	0.35899	0.353575	0.462267	0.53967	p9	ARHGAP24
cg18678971	-1.95327	-0.300724	0.262083	-2.21535	-0.562807	-1.65254	1.77511	9.85429	0.000207342	0.0837925	0.712051	0.708528	0.787466	0.880088	NA	NA
cg25428429	-1.02282	-0.609593	-0.283776	-0.739043	-0.325817	-0.413226	0.11333	9.8531	0.000207502	0.0838106	0.4666	0.464819	0.551455	0.670437	NA	NA
cg01307906	-0.933769	0.393886	0.144925	-1.07869	0.248961	-1.32765	1.31932	9.85005	0.000207914	0.0838336	0.692141	0.735643	0.686074	0.769886	NA	NA
cg24794697	1.49397	0.7304	0.163767	1.3302	0.566633	0.763571	0.749741	9.85001	0.000207919	0.0838336	0.693169	0.658366	0.569477	0.46797	NA	NA
cg21848191	-1.63379	0.305551	0.556935	-2.19072	-0.251385	-1.93934	2.01865	9.84997	0.000207924	0.0838336	0.781469	0.734771	0.793151	0.886238	NA	NA
cg24468603	1.52491	0.719606	0.0295745	1.49533	0.690032	0.805301	0.393069	9.84928	0.000208018	0.0838336	0.646891	0.604133	0.510053	0.387308	NA	NA
cg13507686	-1.13854	-0.185722	-0.140539	-0.998003	-0.0451827	-0.952821	-1.08777	9.84783	0.000208213	0.0838432	0.294204	0.305241	0.324213	0.472969	NA	NA
cg02632314	1.29865	0.193893	0.262007	1.03665	-0.0681139	1.10476	-1.24667	9.8474	0.000208271	0.0838432	0.336532	0.276186	0.30704	0.189801	p1	ELF1
cg03434423	0.866873	0.607294	-0.0171089	0.883982	0.624403	0.259579	-0.853164	9.84621	0.000208432	0.0838618	0.401984	0.414564	0.333496	0.25487	NA	NA
cg27374269	0.97655	0.525216	0.252243	0.724308	0.272973	0.451335	1.70157	9.84489	0.00020861	0.0838872	0.805893	0.752865	0.736469	0.65512	NA	NA
cg08437662	-1.2325	-0.0473656	0.267324	-1.49982	-0.31469	-1.18513	2.41219	9.84345	0.000208807	0.0839199	0.823169	0.822446	0.839697	0.896023	NA	NA
cg22455914	-1.58842	-1.1585	-0.578044	-1.01037	-0.580453	-0.429921	-1.56014	9.83855	0.000209472	0.0841411	0.202272	0.293735	0.354298	0.373027	NA	NA
cg23560704	-1.2745	-0.430129	-0.279798	-0.994701	-0.15033	-0.84437	-0.618423	9.83467	0.00021	0.0843026	0.350286	0.362522	0.417173	0.542871	NA	NA
cg15814747	1.08389	0.432847	0.239196	0.84469	0.193652	0.651038	2.51995	9.83362	0.000210143	0.0843026	0.866799	0.865671	0.829203	0.776898	NA	NA
cg10582152	-1.62772	0.0165101	0.3172	-1.94492	-0.30069	-1.64423	2.06938	9.83305	0.000210221	0.0843026	0.776611	0.728058	0.801985	0.907853	NA	NA
cg23349790	-1.93291	-0.358112	0.0631675	-1.99608	-0.421279	-1.5748	-0.883963	9.82918	0.00021075	0.0843514	0.30465	0.349302	0.341352	0.665936	p1	IGSF21
cg06367354	1.31733	0.436872	-0.0500473	1.36738	0.486919	0.880458	1.36454	9.82864	0.000210825	0.0843514	0.750613	0.763835	0.692112	0.56727	NA	NA
cg07382129	-1.07469	-0.912943	-0.374721	-0.699971	-0.538222	-0.161749	-0.399116	9.82705	0.000211043	0.0843514	0.356837	0.387865	0.496716	0.579181	NA	NA
cg00980106	-1.29475	-0.610409	-0.21852	-1.07623	-0.391889	-0.684339	-0.263787	9.82658	0.000211107	0.0843514	0.388383	0.414451	0.500173	0.619542	NA	NA
cg05400219	-1.08109	-0.0186459	0.354961	-1.43605	-0.373607	-1.06244	0.337691	9.82624	0.000211154	0.0843514	0.540089	0.479189	0.56429	0.691265	NA	NA
cg10405645	1.35169	0.0958291	-0.299021	1.65071	0.39485	1.25586	0.213237	9.82569	0.000211229	0.0843514	0.557309	0.637776	0.537585	0.323296	NA	NA
cg05586607	-1.02523	-0.347048	0.0795574	-1.10478	-0.426606	-0.678179	-0.244623	9.82452	0.00021139	0.0843514	0.414142	0.401164	0.481951	0.616713	NA	NA
cg02717112	-1.25029	-0.555163	-0.150798	-1.09949	-0.404365	-0.695122	-0.553194	9.82238	0.000211684	0.0843514	0.353439	0.347644	0.446131	0.567542	p4	RAPGEF2
cg10338697	-1.21137	-0.412555	-0.131452	-1.07991	-0.281103	-0.798811	0.387481	9.82194	0.000211745	0.0843514	0.516627	0.516066	0.584593	0.732605	NA	NA
cg03993093	-1.39035	-0.133339	0.0893451	-1.47969	-0.222684	-1.25701	0.858296	9.82114	0.000211854	0.0843514	0.613625	0.562392	0.627041	0.817826	NA	NA
cg04881957	-0.396116	1.341	1.35812	-1.75424	-0.017125	-1.73711	-4.46904	9.8203	0.000211971	0.0843514	0.0749974	0.0351326	0.0395554	0.054891	p6	GAPDH
cg02409829	1.07051	0.266927	0.196712	0.873799	0.0702144	0.803584	2.2191	9.81961	0.000212065	0.0843514	0.849622	0.815825	0.810817	0.720096	NA	NA
cg24846775	-1.52106	-0.26881	-0.098815	-1.42225	-0.169995	-1.25225	1.19557	9.81902	0.000212147	0.0843514	0.655852	0.632289	0.69277	0.852089	NA	NA
cg21560521	0.751145	0.935878	0.718922	0.0322227	0.216956	-0.184733	2.48749	9.8185	0.000212219	0.0843514	0.882434	0.848841	0.809567	0.784712	NA	NA
cg09051913	-1.26765	-0.48014	-0.190622	-1.07703	-0.289518	-0.787513	1.52021	9.81687	0.000212444	0.0843514	0.674208	0.745218	0.748093	0.864274	NA	NA
cg11774624	0.680978	0.893738	0.9401	-0.259122	-0.0463615	-0.21276	2.78115	9.81633	0.000212519	0.0843514	0.904855	0.830934	0.833604	0.858512	NA	NA
cg07364631	-0.866099	-0.730423	0.0930003	-0.959099	-0.823423	-0.135676	0.0482016	9.81625	0.000212529	0.0843514	0.447836	0.414262	0.574062	0.6306	NA	NA
cg10309354	-1.39336	-0.487398	-0.790564	-0.602797	0.303166	-0.905963	2.00613	9.81502	0.000212699	0.0843514	0.74577	0.83126	0.806254	0.866657	NA	NA
cg00723847	-1.24131	-0.0717497	-0.258229	-0.983086	0.186479	-1.16957	1.34374	9.81453	0.000212768	0.0843514	0.678514	0.719117	0.714334	0.796779	NA	NA
cg23704137	-1.26593	-0.255138	0.368491	-1.63442	-0.62363	-1.01079	-1.46057	9.81258	0.000213037	0.0843514	0.243982	0.207677	0.28778	0.413792	NA	NA
cg14610236	-1.46239	-0.420811	-0.119767	-1.34262	-0.301044	-1.04158	-0.172378	9.81252	0.000213045	0.0843514	0.410032	0.437045	0.492579	0.666752	NA	NA
cg15094236	1.74613	-0.0169546	-0.819403	2.56553	0.802449	1.76308	0.963572	9.81251	0.000213046	0.0843514	0.683112	0.717544	0.641854	0.459058	NA	NA
cg04963967	-1.65012	-0.220965	-0.0678376	-1.58229	-0.153127	-1.42916	0.203582	9.81153	0.000213183	0.0843514	0.475619	0.538792	0.540668	0.710232	NA	NA
cg10421346	1.58657	0.340849	-0.0523906	1.63896	0.393239	1.24572	1.1407	9.8113	0.000213214	0.0843514	0.725962	0.734838	0.683992	0.42546	NA	NA
cg24629020	-1.44979	-0.141199	-0.165266	-1.28453	0.0240671	-1.30859	-0.860371	9.81119	0.00021323	0.0843514	0.325768	0.365338	0.361007	0.496223	NA	NA
cg27232629	-1.13362	-0.372948	0.0685098	-1.20213	-0.441458	-0.760676	-0.735936	9.80863	0.000213585	0.0844046	0.342528	0.299578	0.407658	0.521575	NA	NA
cg17852388	-1.61421	-0.267981	0.353714	-1.96793	-0.621696	-1.34623	1.58611	9.80855	0.000213596	0.0844046	0.706728	0.659075	0.753669	0.861847	p	ZNF720
cg15016481	-1.14527	-0.264951	-0.759406	-0.385869	0.494455	-0.880324	1.07477	9.80635	0.000213903	0.0844666	0.633324	0.681807	0.647953	0.78708	NA	NA
cg25758918	-1.3114	-0.420393	-0.100728	-1.21067	-0.319665	-0.891009	1.52028	9.80576	0.000213984	0.0844666	0.668413	0.767918	0.762356	0.810746	NA	NA
cg08888490	1.40489	0.468941	0.211983	1.1929	0.256958	0.935946	1.77357	9.80354	0.000214293	0.0845288	0.820054	0.737382	0.750597	0.63889	NA	NA
cg04101969	-2.6187	-0.24595	-0.114031	-2.50466	-0.131919	-2.37275	-3.55497	9.80228	0.000214469	0.0845288	0.0611874	0.079912	0.0803579	0.345739	p1	GJB6
cg15808924	-1.06948	-0.461168	0.13033	-1.19981	-0.591498	-0.608312	0.418591	9.80151	0.000214577	0.0845288	0.5075	0.560788	0.601823	0.675441	NA	NA
cg07791222	-1.02742	-0.814308	-0.568703	-0.458715	-0.245604	-0.21311	2.03215	9.80131	0.000214605	0.0845288	0.753932	0.75141	0.822615	0.886298	NA	NA
cg15911594	1.13616	-0.164998	-0.241687	1.37785	0.076689	1.30116	1.74537	9.79909	0.000214915	0.0845375	0.775392	0.796655	0.78074	0.63813	NA	NA
cg17937464	-0.999229	-0.400569	0.55139	-1.55062	-0.951959	-0.59866	1.10793	9.79789	0.000215083	0.0845375	0.636969	0.604259	0.728408	0.746919	NA	NA
cg17413194	-1.06845	0.26996	0.154842	-1.2233	0.115118	-1.33841	1.40629	9.7971	0.000215193	0.0845375	0.729122	0.677752	0.699381	0.801513	NA	NA
cg06951727	-0.98926	-0.710327	-0.197393	-0.791867	-0.512934	-0.278933	-1.64857	9.79634	0.000215299	0.0845375	0.197414	0.212269	0.284584	0.356601	p	LRRFIP1
cg19143990	1.27933	0.0492444	-0.343561	1.62289	0.392805	1.23009	-1.33836	9.79559	0.000215406	0.0845375	0.322241	0.297956	0.280188	0.196562	NA	NA
cg14102988	-1.92134	-0.491503	-0.176791	-1.74455	-0.314713	-1.42984	-1.8263	9.79492	0.000215499	0.0845375	0.18775	0.179993	0.236011	0.461873	p5	LPAR1
cg03775330	1.21546	0.157173	-0.290265	1.50573	0.447438	1.05829	2.43864	9.79452	0.000215556	0.0845375	0.855857	0.875574	0.834501	0.736725	NA	NA
cg01661284	1.11515	0.462491	-0.0819595	1.19711	0.54445	0.652663	2.75401	9.79391	0.000215641	0.0845375	0.892623	0.888637	0.847835	0.801801	p	TMED8
cg16334882	-1.2273	-0.360772	-0.0871667	-1.14013	-0.273605	-0.866528	-1.28186	9.79325	0.000215733	0.0845375	0.260791	0.24509	0.306309	0.465046	NA	NA
cg09229493	1.07991	0.226021	0.0941882	0.985725	0.131833	0.853891	-0.954684	9.79289	0.000215784	0.0845375	0.385229	0.324718	0.332806	0.252098	p17	PISD
cg21619775	-1.12426	-0.120287	0.411379	-1.53564	-0.531666	-1.00397	1.08542	9.7919	0.000215923	0.0845464	0.666813	0.555669	0.675757	0.80741	NA	NA
cg11587466	1.09935	0.644447	0.714436	0.384914	-0.0699886	0.454903	2.8588	9.78937	0.000216279	0.0846171	0.905383	0.861515	0.857792	0.802481	NA	NA
cg02141144	-1.32502	-0.451356	-0.203598	-1.12142	-0.247759	-0.873662	0.784183	9.78746	0.000216548	0.0846171	0.587985	0.560776	0.656924	0.753033	NA	NA
cg05235344	-0.820011	-0.730058	-0.262029	-0.557982	-0.468029	-0.0899525	-1.08436	9.78676	0.000216647	0.0846171	0.266995	0.28963	0.374971	0.421753	NA	NA
cg23908403	-1.40036	-0.362288	0.246689	-1.64705	-0.608977	-1.03808	1.57873	9.78555	0.000216818	0.0846171	0.684653	0.72935	0.762493	0.844312	NA	NA
cg22557167	1.07342	0.676182	0.213094	0.860325	0.463088	0.397237	0.794449	9.78454	0.000216961	0.0846171	0.695875	0.646516	0.594933	0.482422	NA	NA
cg22301097	-1.6155	-0.0706127	-0.105563	-1.50994	0.0349503	-1.54489	0.493877	9.78423	0.000217004	0.0846171	0.527059	0.622451	0.582952	0.705751	NA	NA
cg15479189	-1.39208	-0.546115	-0.200665	-1.19141	-0.345449	-0.845963	-0.74935	9.78408	0.000217026	0.0846171	0.315449	0.329024	0.402169	0.587494	NA	NA
cg23373556	0.850736	0.741946	0.143039	0.707697	0.598907	0.10879	1.37081	9.78405	0.00021703	0.0846171	0.769857	0.757165	0.659547	0.651226	NA	NA
cg25486993	-0.844844	-0.787189	-0.425237	-0.419607	-0.361953	-0.0576544	-1.56185	9.78209	0.000217307	0.0846799	0.207285	0.23891	0.30323	0.332949	NA	NA
cg11837749	-1.34623	-0.292494	-0.2026	-1.14363	-0.0898939	-1.05374	-0.375561	9.77861	0.000217801	0.0847147	0.393875	0.407507	0.446516	0.600806	NA	NA
cg16420756	-1.51302	-0.274829	-0.141098	-1.37193	-0.133731	-1.2382	-1.85911	9.77843	0.000217826	0.0847147	0.191043	0.198861	0.220227	0.407601	NA	NA
cg21880624	-1.26261	-0.610269	-0.24256	-1.02005	-0.367708	-0.652344	2.82265	9.77735	0.000217979	0.0847147	0.827989	0.861276	0.884449	0.932648	p	ETS2
cg24597875	-1.23508	-0.117719	0.137653	-1.37273	-0.255373	-1.11736	2.03398	9.7764	0.000218115	0.0847147	0.789248	0.747201	0.800128	0.887225	NA	NA
cg26307581	-1.07571	0.161264	0.313729	-1.38944	-0.152465	-1.23698	0.471551	9.77627	0.000218133	0.0847147	0.558844	0.557804	0.564661	0.717896	NA	NA
cg10820736	-1.51762	-0.198316	-0.125829	-1.39179	-0.0724866	-1.31931	0.770865	9.77562	0.000218224	0.0847147	0.578884	0.607334	0.605819	0.836992	NA	NA
cg09550041	-1.64931	-0.168014	-0.128158	-1.52115	-0.0398554	-1.4813	-2.1176	9.77548	0.000218245	0.0847147	0.166161	0.186481	0.18148	0.398308	p1	LRRC52
cg09554103	0.480983	0.733526	0.496841	-0.0158578	0.236685	-0.252543	0.946734	9.77453	0.00021838	0.0847147	0.711105	0.638249	0.620418	0.567936	NA	NA
cg10820485	1.28206	0.346673	0.123691	1.15837	0.222982	0.935386	-0.294577	9.7741	0.000218441	0.0847147	0.489695	0.515652	0.449177	0.247668	NA	NA
cg07551060	1.24544	0.633512	0.306722	0.938713	0.32679	0.611923	0.954939	9.77241	0.000218682	0.0847355	0.719421	0.646355	0.604832	0.549026	NA	NA
cg21220670	-1.17666	0.010689	-0.688679	-0.487981	0.699368	-1.18735	2.27424	9.7721	0.000218726	0.0847355	0.794078	0.867424	0.807729	0.894903	NA	NA
cg04834693	-1.16726	-0.838365	-0.312135	-0.855127	-0.52623	-0.328897	1.02216	9.76958	0.000219086	0.0848299	0.575053	0.687042	0.695612	0.802643	NA	NA
cg12295485	-1.47044	-0.241353	0.0805328	-1.55097	-0.321886	-1.22909	-0.314362	9.76733	0.000219408	0.0849094	0.4011	0.379339	0.461019	0.65439	NA	NA
cg22389121	-0.878188	-0.560472	0.0257002	-0.903888	-0.586173	-0.317715	1.39827	9.76555	0.000219663	0.0849306	0.670092	0.657486	0.736035	0.859014	NA	NA
cg04048950	1.20418	0.342763	-0.186111	1.39029	0.528874	0.861415	0.913506	9.76532	0.000219695	0.0849306	0.719868	0.609253	0.613894	0.537992	NA	NA
cg01605949	1.44215	0.181167	0.00192096	1.44023	0.179247	1.26098	1.4419	9.76417	0.00021986	0.0849493	0.745389	0.765346	0.735044	0.540925	NA	NA
cg25099065	-1.25559	-0.21025	-0.335323	-0.920271	0.125072	-1.04534	1.90875	9.76201	0.00022017	0.0849959	0.759712	0.790356	0.783374	0.862996	NA	NA
cg25369211	-1.04943	-0.423536	-0.114653	-0.934779	-0.308883	-0.625897	0.688046	9.76138	0.00022026	0.0849959	0.568449	0.575113	0.630069	0.762338	NA	NA
cg12898427	0.984524	0.573764	0.118731	0.865793	0.455032	0.41076	1.26143	9.75989	0.000220474	0.0849959	0.749251	0.731507	0.675021	0.564746	NA	NA
cg09629679	-1.33771	-0.359242	-0.0314754	-1.30624	-0.327766	-0.978471	0.156229	9.75942	0.000220542	0.0849959	0.475317	0.462043	0.548633	0.708456	NA	NA
cg16268734	1.83287	0.417201	0.0131625	1.8197	0.404038	1.41567	2.49808	9.75928	0.000220562	0.0849959	0.876817	0.857752	0.838796	0.683251	NA	NA
cg27065717	-1.36075	-0.520873	-0.773641	-0.587109	0.252767	-0.839877	1.14364	9.75774	0.000220783	0.085036	0.622761	0.693978	0.687882	0.824895	NA	NA
cg09419518	1.04921	-0.0615282	-0.133604	1.18281	0.0720758	1.11074	-0.130404	9.75628	0.000220994	0.0850361	0.487015	0.496612	0.487077	0.387052	p,p	TTC4,MROH7-TTC4
cg16032884	-0.841732	-0.682882	-0.244695	-0.597036	-0.438187	-0.158849	0.00673479	9.75613	0.000221016	0.0850361	0.434977	0.460791	0.554599	0.615284	NA	NA
cg03363567	-1.6551	-0.468889	-0.695923	-0.95918	0.227034	-1.18621	-4.33327	9.7516	0.00022167	0.0852007	0.038622	0.0507591	0.0508967	0.123475	p1	DHX40
cg03434029	-1.4734	-0.357307	0.166866	-1.64026	-0.524173	-1.11609	-2.11266	9.75155	0.000221677	0.0852007	0.180591	0.135381	0.211214	0.315265	p1	BTBD19
cg02998240	-0.976989	-0.54204	-0.183849	-0.79314	-0.358191	-0.434949	-0.650337	9.75026	0.000221863	0.0852273	0.332525	0.363815	0.429839	0.528049	NA	NA
cg17158559	1.16722	0.132535	0.166857	1.00036	-0.0343218	1.03468	3.0668	9.7487	0.000222089	0.0852692	0.903151	0.903125	0.88962	0.816486	NA	NA
cg05705052	-1.46995	0.291347	0.399947	-1.86989	-0.1086	-1.76129	-0.353291	9.74745	0.00022227	0.085294	0.414958	0.449564	0.420153	0.587191	NA	NA
cg24774200	-1.01646	0.0863853	0.187764	-1.20422	-0.101379	-1.10284	0.786976	9.74556	0.000222546	0.0853217	0.620317	0.578172	0.622066	0.756584	NA	NA
cg25158734	1.38452	-0.253096	0.176642	1.20788	-0.429738	1.63762	-0.63229	9.74432	0.000222725	0.0853217	0.416417	0.351632	0.435744	0.248024	NA	NA
cg14825187	-0.843306	-0.801813	-0.0839173	-0.759389	-0.717896	-0.0414926	2.12998	9.744	0.000222773	0.0853217	0.761607	0.761614	0.857537	0.836445	NA	NA
cg07766803	-1.01611	-0.521563	-0.410829	-0.60528	-0.110734	-0.494546	-0.0885885	9.7436	0.00022283	0.0853217	0.440868	0.467028	0.490449	0.646623	NA	NA
cg15958104	-1.16306	-0.618897	-0.28238	-0.880685	-0.336518	-0.544167	0.543504	9.74294	0.000222927	0.0853217	0.537021	0.533831	0.621183	0.74876	NA	NA
cg23681664	-1.85453	0.00459267	0.49485	-2.34938	-0.490257	-1.85912	-1.9967	9.74127	0.000223169	0.0853429	0.182783	0.185	0.192058	0.426647	NA	NA
cg21238609	-0.904335	-0.7667	-0.339541	-0.564794	-0.427159	-0.137635	0.600942	9.74095	0.000223216	0.0853429	0.539896	0.554685	0.641586	0.727242	NA	NA
cg14116294	0.776979	0.80909	0.405996	0.370983	0.403094	-0.0321103	0.606521	9.73956	0.000223419	0.0853552	0.668765	0.617884	0.531465	0.543931	NA	NA
cg19106353	-0.520819	-1.19406	-0.964072	0.443253	-0.22999	0.673242	0.647154	9.73913	0.000223482	0.0853552	0.522928	0.578471	0.673371	0.68403	NA	NA
cg13361779	-1.28497	-0.0130225	-0.0891276	-1.19584	0.0761051	-1.27195	-0.60812	9.73639	0.000223881	0.0853818	0.378712	0.398239	0.377893	0.559932	NA	NA
cg17838834	-1.36067	-0.587074	-0.618676	-0.741993	0.0316016	-0.773594	-0.363292	9.73565	0.00022399	0.0853818	0.378722	0.443684	0.466066	0.56951	NA	NA
cg11699576	-1.71782	-0.400044	-0.214105	-1.50372	-0.185939	-1.31778	0.28402	9.73559	0.000223999	0.0853818	0.468164	0.586866	0.542211	0.763387	NA	NA
cg25735305	1.479	-0.390097	-0.822314	2.30131	0.432218	1.8691	1.49753	9.73543	0.000224021	0.0853818	0.743664	0.76155	0.740812	0.544944	NA	NA
cg16740910	1.35715	0.569692	0.380556	0.976589	0.189136	0.787453	1.41641	9.73465	0.000224136	0.0853818	0.777171	0.738046	0.701492	0.557833	NA	NA
cg22841357	-1.87775	0.255537	0.419183	-2.29694	-0.163646	-2.13329	-2.2579	9.73091	0.000224685	0.0855463	0.203749	0.108194	0.158459	0.38295	NA	NA
cg02021485	-0.958325	0.285218	0.0343844	-0.992709	0.250833	-1.24354	1.73363	9.72965	0.00022487	0.085572	0.762564	0.781991	0.742228	0.829896	NA	NA
cg18290640	-1.34575	-0.24497	0.0548728	-1.40062	-0.299842	-1.10078	-0.0660677	9.72582	0.000225433	0.0857415	0.447364	0.444416	0.497782	0.662983	NA	NA
cg21908110	1.20753	0.647489	0.509945	0.697587	0.137544	0.560044	0.588033	9.72249	0.000225924	0.0858758	0.663213	0.590742	0.558788	0.440022	NA	NA
cg03851645	-0.277101	-0.100823	-1.23092	0.953821	1.1301	-0.176277	-2.81339	9.72183	0.000226021	0.0858758	0.132846	0.163274	0.112524	0.188512	p1	PLCD1
cg21281167	1.00486	0.630207	0.154708	0.850155	0.475499	0.374656	1.99819	9.72088	0.000226162	0.0858849	0.834993	0.821805	0.761582	0.712478	NA	NA
cg26262197	-1.60547	-0.325617	-0.16406	-1.44141	-0.161557	-1.27985	1.23016	9.71787	0.000226607	0.0859411	0.630665	0.711463	0.692062	0.860151	NA	NA
cg08411235	-1.04994	-0.585502	-0.0646478	-0.985292	-0.520854	-0.464437	-0.207858	9.71713	0.000226717	0.0859411	0.40859	0.393723	0.511982	0.606155	NA	NA
cg04751089	-1.16591	-0.623483	-0.89725	-0.268658	0.273767	-0.542425	-0.191474	9.71512	0.000227015	0.0859411	0.402345	0.490247	0.489398	0.609556	p3	IRS1
cg04797958	-1.16618	-0.249121	-0.0345376	-1.13164	-0.214584	-0.917054	-0.195675	9.71479	0.000227063	0.0859411	0.422996	0.427224	0.470584	0.66545	NA	NA
cg19255874	1.16274	-0.0618988	0.0457116	1.11703	-0.10761	1.22464	-1.72258	9.71348	0.000227259	0.0859411	0.266152	0.200595	0.252009	0.159109	p	LOC388282
cg10293217	0.479967	0.835814	0.851123	-0.371156	-0.0153093	-0.355847	1.23888	9.71224	0.000227442	0.0859411	0.761244	0.626267	0.654735	0.676355	NA	NA
cg05130816	1.3372	0.480073	0.433045	0.90415	0.0470281	0.857122	0.655065	9.71175	0.000227516	0.0859411	0.66159	0.640683	0.60293	0.376639	NA	NA
cg22934308	1.26129	0.277095	-0.510605	1.7719	0.7877	0.984198	0.544214	9.71161	0.000227537	0.0859411	0.62827	0.6694	0.578071	0.381394	NA	NA
cg23940311	1.20141	-0.251125	-0.830065	2.03148	0.57894	1.45254	1.2012	9.71071	0.00022767	0.0859411	0.683243	0.718437	0.6998	0.595746	NA	NA
cg26897713	-0.634982	0.748676	1.02539	-1.66037	-0.276717	-1.38366	-3.08123	9.71009	0.000227762	0.0859411	0.132662	0.0699572	0.0873924	0.195957	NA	NA
cg21085022	-1.3658	-0.399208	0.422356	-1.78816	-0.821564	-0.966593	1.07111	9.70945	0.000227858	0.0859411	0.623413	0.61103	0.692489	0.831778	NA	NA
cg15610027	-2.08184	-0.549828	-0.996122	-1.08572	0.446294	-1.53201	-0.96747	9.70705	0.000228217	0.0859411	0.284284	0.386129	0.321343	0.611644	p4	DTNA
cg06901200	-1.34504	-0.0173376	0.00555315	-1.3506	-0.0228907	-1.32771	-0.787339	9.70666	0.000228274	0.0859411	0.348206	0.335199	0.358002	0.538994	NA	NA
cg12396057	0.936068	0.550699	0.114291	0.821777	0.436407	0.385369	2.2578	9.70619	0.000228345	0.0859411	0.864002	0.818778	0.794424	0.763447	NA	NA
cg17972995	0.859868	0.89216	0.812964	0.0469043	0.079196	-0.0322917	2.93702	9.70557	0.000228437	0.0859411	0.914696	0.859519	0.856865	0.845634	NA	NA
cg17317764	1.17195	0.199479	-0.359621	1.53157	0.5591	0.972467	0.288138	9.70545	0.000228454	0.0859411	0.603101	0.562208	0.522642	0.386198	NA	NA
cg21656801	-0.610087	0.635272	0.586429	-1.19652	0.048843	-1.24536	-3.53685	9.70521	0.00022849	0.0859411	0.0896142	0.0903126	0.0680545	0.110462	NA	NA
cg27625479	1.37149	0.576394	-0.0529272	1.42442	0.629322	0.7951	1.47739	9.7052	0.000228493	0.0859411	0.769022	0.775604	0.704291	0.564055	NA	NA
cg09692449	-1.07545	-0.53687	0.0138935	-1.08935	-0.550763	-0.538584	-0.0415885	9.70484	0.000228546	0.0859411	0.434336	0.463951	0.531147	0.619047	p	KRT19
cg24905039	-1.61827	-0.8679	-0.630492	-0.987777	-0.237408	-0.750369	0.881726	9.7038	0.000228701	0.0859551	0.55936	0.644953	0.681393	0.789556	NA	NA
cg19426434	1.01498	0.568346	0.34371	0.671267	0.224636	0.446631	1.19656	9.70114	0.0002291	0.0860135	0.751606	0.687407	0.660074	0.579023	p	KLHL6
cg17633917	1.36143	0.408971	-0.10391	1.46534	0.512881	0.952454	0.847395	9.70048	0.000229198	0.0860135	0.678994	0.668388	0.622573	0.494966	NA	NA
cg13941235	-1.51904	-0.630519	-0.464373	-1.05467	-0.166146	-0.88852	0.0168369	9.70018	0.000229243	0.0860135	0.442558	0.458994	0.536071	0.657798	NA	NA
cg02905828	1.37008	-0.0957674	-0.683214	2.05329	0.587447	1.46584	-1.00006	9.69889	0.000229437	0.0860135	0.347465	0.525478	0.326291	0.213221	p1	SNORD28
cg12040203	0.678438	-0.558744	0.0119043	0.666534	-0.570648	1.23718	3.11986	9.69884	0.000229446	0.0860135	0.881479	0.892335	0.912984	0.857772	NA	NA
cg04874580	-1.14251	-0.757647	-0.631272	-0.511242	-0.126375	-0.384867	-0.377436	9.69764	0.000229625	0.0860366	0.361166	0.433467	0.486002	0.570884	NA	NA
cg18824549	-1.34372	-0.497065	-0.105125	-1.2386	-0.39194	-0.846659	-0.107157	9.69536	0.000229968	0.0861209	0.42881	0.431188	0.516329	0.637849	NA	NA
cg02101707	-1.06866	-0.431387	0.0888107	-1.15747	-0.520198	-0.637271	-0.884847	9.69102	0.000230622	0.0863153	0.311521	0.285106	0.389859	0.496708	NA	NA
cg12799349	0.499548	0.69552	0.724509	-0.224961	-0.0289881	-0.195972	-3.55653	9.69035	0.000230724	0.0863153	0.0939932	0.0817865	0.0697762	0.0684261	p1	RALBP1
cg06209576	0.0725491	0.244638	-0.989078	1.06163	1.23372	-0.172089	0.183385	9.68767	0.000231128	0.0863881	0.516257	0.732	0.487665	0.442577	NA	NA
cg12750031	-1.41182	-0.0568073	0.253436	-1.66525	-0.310243	-1.35501	0.833728	9.6875	0.000231155	0.0863881	0.611558	0.578221	0.632458	0.77367	p2	LRRC69
cg11139633	-0.415722	0.999717	0.337934	-0.753656	0.661783	-1.41544	-1.2556	9.68579	0.000231413	0.0864367	0.343726	0.339541	0.229826	0.373611	NA	NA
cg24185850	-1.34427	-0.469719	0.260969	-1.60524	-0.730689	-0.874552	1.70628	9.68508	0.000231521	0.0864367	0.72009	0.652792	0.775783	0.880534	NA	NA
cg18166959	-1.13217	-0.539624	-0.274264	-0.857906	-0.26536	-0.592546	0.0602313	9.68341	0.000231774	0.0864869	0.459914	0.454552	0.528513	0.699607	NA	NA
cg20914416	-0.82629	-0.788729	-0.413448	-0.412842	-0.375281	-0.0375611	-1.03658	9.68066	0.000232192	0.0865585	0.268004	0.313033	0.379198	0.440848	NA	NA
cg07367469	-1.15551	-0.16524	-0.314405	-0.841103	0.149166	-0.990269	-1.17006	9.68012	0.000232275	0.0865585	0.283125	0.305307	0.310723	0.427995	NA	NA
cg25110204	-1.20024	-0.321551	-0.106464	-1.09378	-0.215087	-0.878694	1.80465	9.67981	0.000232322	0.0865585	0.726297	0.740578	0.750208	0.905466	NA	NA
cg13485533	-1.1416	-0.353823	0.0800649	-1.22166	-0.433888	-0.787773	0.171078	9.67732	0.0002327	0.0866553	0.488887	0.451108	0.54781	0.707169	NA	NA
cg20571958	1.23624	0.0564954	0.696464	0.539777	-0.639969	1.17975	1.52535	9.67407	0.000233197	0.0867697	0.779086	0.615628	0.756143	0.600572	NA	NA
cg00218146	-0.616006	0.132047	-1.45886	0.842854	1.59091	-0.748053	-3.72608	9.67298	0.000233363	0.0867697	0.070689	0.136413	0.0609339	0.0866853	p2	KLF13
cg06517489	-1.3027	0.544887	-0.570388	-0.73231	1.11528	-1.84758	-2.11169	9.67297	0.000233364	0.0867697	0.190677	0.296328	0.143871	0.330079	p3	SLC17A6
cg14186103	-1.26547	-0.22447	0.631447	-1.89691	-0.855917	-1.041	0.0401077	9.6706	0.000233728	0.0868607	0.501051	0.305646	0.530887	0.696221	NA	NA
cg09638473	2.08482	0.289725	-0.386504	2.47133	0.676228	1.7951	1.24356	9.6685	0.000234049	0.0868835	0.762074	0.675003	0.667349	0.477325	NA	NA
cg07906992	-1.06127	-0.653929	-0.348725	-0.71254	-0.305204	-0.407337	-0.96487	9.66796	0.000234132	0.0868835	0.287079	0.301285	0.385928	0.466932	NA	NA
cg01604459	-1.17133	-0.558165	-0.154707	-1.01662	-0.403458	-0.613164	-1.37073	9.66763	0.000234182	0.0868835	0.241325	0.239694	0.312808	0.419767	NA	NA
cg12207747	-1.27777	-0.269301	0.0128467	-1.29062	-0.282148	-1.00847	-0.0182347	9.66709	0.000234265	0.0868835	0.453331	0.448926	0.494827	0.714053	NA	NA
cg09708275	-1.22622	-0.274103	-0.20019	-1.02603	-0.0739126	-0.95212	-1.24882	9.66313	0.000234875	0.0870136	0.265634	0.255833	0.308681	0.468517	NA	NA
cg01698298	1.76888	0.072288	-0.00584393	1.77472	0.078132	1.69659	-0.429603	9.66273	0.000234936	0.0870136	0.480153	0.427102	0.428744	0.320347	p1	VWCE
cg22648750	0.877085	0.884042	0.588821	0.288264	0.295222	-0.00695722	2.44985	9.66249	0.000234973	0.0870136	0.879038	0.833861	0.812821	0.757738	NA	NA
cg21570911	-1.05319	-0.762021	-0.309676	-0.743515	-0.452345	-0.29117	-0.504562	9.65943	0.000235444	0.087046	0.344564	0.37332	0.473219	0.545692	NA	NA
cg08130309	-0.132869	-0.800688	-1.32651	1.19364	0.525822	0.667818	2.83229	9.65903	0.000235507	0.087046	0.843303	0.903996	0.883021	0.880193	NA	NA
cg08265449	-0.970748	-0.46141	-0.0483015	-0.922447	-0.413109	-0.509338	0.797059	9.65866	0.000235563	0.087046	0.597891	0.551178	0.652156	0.777536	NA	NA
cg01895890	-1.31239	-0.149685	0.0195046	-1.3319	-0.169189	-1.16271	0.291385	9.6586	0.000235573	0.087046	0.528824	0.451294	0.545479	0.745192	NA	NA
cg02214783	-1.461	-0.302407	-0.207734	-1.25326	-0.0946723	-1.15859	1.19657	9.65806	0.000235657	0.087046	0.647122	0.662713	0.696862	0.836243	NA	NA
cg00213487	-1.24275	-0.498898	-0.149339	-1.09341	-0.349559	-0.743853	0.217004	9.65461	0.00023619	0.0870722	0.503053	0.447956	0.549483	0.705899	NA	NA
cg13951797	1.01688	-0.283999	-0.739387	1.75627	0.455389	1.30088	-0.732852	9.65237	0.000236538	0.0870722	0.364505	0.506782	0.396754	0.234066	NA	NA
cg00155777	1.15571	0.508531	0.813604	0.342108	-0.305072	0.64718	-0.126156	9.65225	0.000236556	0.0870722	0.560879	0.417269	0.477744	0.294918	NA	NA
cg04981165	-0.930567	-0.393993	-0.00805704	-0.92251	-0.385936	-0.536575	0.437813	9.65201	0.000236594	0.0870722	0.521575	0.53701	0.600195	0.714711	NA	NA
cg25375317	-1.32582	0.119869	0.331687	-1.65751	-0.211818	-1.44569	1.12643	9.65101	0.00023675	0.0870722	0.682493	0.565544	0.662994	0.83734	NA	NA
cg25468058	-1.37127	-0.492036	-0.0364499	-1.33482	-0.455586	-0.879235	1.43367	9.65094	0.00023676	0.0870722	0.682111	0.661112	0.747859	0.846725	p	ANXA9
cg25182763	-0.986598	-0.53687	-0.00703568	-0.979563	-0.529834	-0.449729	0.231678	9.64983	0.000236932	0.0870722	0.490692	0.465675	0.575869	0.686642	NA	NA
cg23264234	1.23641	0.308354	0.280222	0.956185	0.0281317	0.928054	-0.595655	9.64969	0.000236954	0.0870722	0.462507	0.32384	0.383598	0.34966	NA	NA
cg07645228	1.47664	-0.0446245	0.0923546	1.38428	-0.136979	1.52126	0.532466	9.64871	0.000237106	0.0870722	0.634666	0.566106	0.59017	0.438952	NA	NA
cg05321694	-0.705265	-0.685698	-0.2365	-0.468765	-0.449198	-0.019567	-0.663626	9.64869	0.000237109	0.0870722	0.335977	0.347389	0.437176	0.489132	NA	NA
cg15112076	-1.33738	-0.624715	-0.153356	-1.18402	-0.47136	-0.712664	-0.403274	9.64858	0.000237127	0.0870722	0.376775	0.352752	0.468058	0.622607	NA	NA
cg14602413	-1.51503	-0.025493	-0.0867096	-1.42832	0.0612165	-1.48954	1.42443	9.64837	0.000237159	0.0870722	0.685413	0.71891	0.701346	0.88349	NA	NA
cg14866200	-2.84172	-0.247763	0.210078	-3.05179	-0.457841	-2.59395	-2.38814	9.6475	0.000237295	0.0870786	0.130667	0.192403	0.178087	0.433864	p2	SHISA3
cg09297933	-1.7371	0.16104	0.382066	-2.11917	-0.221026	-1.89814	1.03641	9.64599	0.00023753	0.0871032	0.644958	0.614754	0.636376	0.835324	NA	NA
cg19192282	-1.5129	-0.580416	-0.289846	-1.22305	-0.290571	-0.932482	-0.295633	9.64452	0.00023776	0.0871032	0.384825	0.393378	0.480966	0.659719	NA	NA
cg25048686	1.36319	-0.0659874	0.408384	0.954803	-0.474371	1.42917	2.78112	9.64433	0.000237789	0.0871032	0.881236	0.848267	0.882516	0.784074	NA	NA
cg20095427	1.89476	-0.0183036	-0.157904	2.05266	0.1396	1.91306	3.02565	9.64401	0.000237839	0.0871032	0.904568	0.892706	0.887935	0.743543	NA	NA
cg14432944	0.646443	0.681577	0.269971	0.376472	0.411606	-0.0351344	1.38745	9.64192	0.000238165	0.0871789	0.766737	0.746447	0.679139	0.640653	NA	NA
cg04645521	-1.413	-0.289615	0.0654753	-1.47848	-0.35509	-1.12339	0.739661	9.6409	0.000238324	0.0871892	0.583843	0.548	0.620877	0.815035	NA	NA
cg22319016	-1.12174	0.00842349	-0.345223	-0.776521	0.353647	-1.13017	1.87153	9.64021	0.000238432	0.0871892	0.762427	0.810655	0.762831	0.850195	NA	NA
cg18800081	1.10969	0.0435546	-0.213545	1.32324	0.257099	1.06614	0.199222	9.63879	0.000238655	0.087193	0.55758	0.572424	0.530125	0.407073	NA	NA
cg18222609	-1.17322	-0.440626	-0.108061	-1.06516	-0.332566	-0.732598	1.94828	9.63862	0.000238681	0.087193	0.750887	0.790684	0.811645	0.847485	p3	CTGF
[truncated: 698 more rows]
