# Supplementary material for: Nongenetic Evolution Drives Lung Adenocarcinoma Spatial Heterogeneity and Progression
Source: Oxford University Press journal article supplement (doi:10.1158/2159-8290.cd-20-1274), 2021-02-09
Supplement: 21598290cd201274-sup-250305_2_supp_6853948_qn4tzl.xlsx [file 21598290cd201274-sup-250305_2_supp_6853948_qn4tzl.xlsx]

## Sheet: Table legend
Supplementary Table 5. CHUV cohort, clinical characteristics and molecular and imaging data generated for each sample.

## Sheet: CHUV cohort
Patient	Age	Sex	TNM	Stage	Pattern A	%	Pattern B	%	Pattern C	%	Pattern D	%	Clincal Driver
1	64	F	pT2bN0	IIA	lepidic	60	acinar	30	solid	10			NA
2	77	F	pT2aN0	IB	lepidic	40	acinar	30	papillary	30			EGFR
3	71	M	pT2aN0	IB	lepidic	50	papillary	30	acinar	20			NA
4	70	M	pT2aN0	IB	lepidic	80	acinar	20					NA
5	53	M	pT1bN0	IA2	acinar	60	lepidic	40					NA
6	59	M	pT2aN1	IIB	papillary	40	acinar	30	solid	20	lepidic	10	KRAS
7	81	M	pT2aN0	IB	solid	60	lepidc	30	acinar	10			IDH1
8	78	F	pT2aN0	IB	solid	40	lepidc	30	acinar	20	papillaty	10	EGFR
9	68	F	pT1aN0	IA1	lepidic	70	acinar	30					NA
10	65	F	pT1bN0	IA2	lepidc	10	papillary	40	acinar	50			NA
11	72	F	PT2aN1	IIB	acinar	75	solid	15	lepidic	10			EGFR
12	78	F	pT1cN0	IA3	solid	30	lepidc	30	acinar	40			BRAF
13	73	M	pT1cN1	IA3	Acinar	60	papillary	15	lepidic	15	solid	10	EGFR
					one region selected for molecular analyses
					two non-adjacent regions selected for molecular analyses

## Sheet: CHUV molecular data
Patient	Region	Sample	Pattern	Whole-exome sequencing	RNA sequencing	DNA methylation
1	A	s1A	normal	x
	B	s1B	lepidic	x	x	x
	C	s1C	acinar	x	x	x
	D	s1D	lepidic	x	x	x
	E	s1E	acinar	x	x	x
	F	s1F	solid	x	x	x
2	A	s2A	normal	x
	B	s2B	lepidic	x	x
	C	s2C	papillary	x	x	x
	D	s2D	acinar	x	x	x
3	A	s3A	normal	x
	B	s3B	lepidic	x	x	x
	C	s3C	lepidic	x	x	x
	D	s3D	acinar	x	x	x
	E	s3E	acinar	x	x	x
4	A	s4A	normal	x
	B	s4B	acinar	x	x	x
	C	s4C	lepidic	x	x	x
5	A	s5A	normal	x
	B	s5B	lepidic	x	x	x
	C	s5C	acinar	x	x	x
6	A	s6A	normal	x
	B	s6B	papillary	x	x	x
	C	s6C	acinar	x	x	x
7	A	s7A	normal	x
	B	s7B	lepidic	x	x	x
	C	s7C	solid	x	x	x
8	A	s8A	normal
	B	s8B	solid	x	x	x
	C	s8C	lepidic		x	x
	D	s8D	papillary	x	x	x
	E	s8E	lepidic	x	x	x
9	A	s9A	normal	x
	B	s9B	acinar	x	x	x
	C	s9C	lepidic		x	x
10	A	s10A	normal	x
	B	s10B	lepidic	x	x	x
	C	s10C	papillary	x	x	x
	D	s10D	acinar	x	x	x

## Sheet: CHUV imaging data
Patient	Slide	Patterns on the slide	H&E staining	TTF1 staining	Multicolor immunofluorescence	DSP
1	s1D	normal, lepidic, acinar	x	x	x	x (batch1)
2	s2C	normal, papillary, acinar	x	x	x	x (batch1)
3	s3E	normal, lepidic, papillary, acinar	x	x	x
4	s4B	normal, lepidic, acinar	x	x	x
5	s5C	normal, acinar	x	x	x	x (batch1)
6	s6C	normal, acinar	x	x	x
7	s7C	normal, solid	x	x	x
8	s8B	normal, lepidic, papillary, acinar, solid	x	x	x	x (batch1)
9	s9B	normal, acinar	x	x	x
10	s10B	normal, lepidic, acinar	x		x	x (batch1)
10	s10D	normal, acinar	x	x	x
11	s11C	normal, lepidic, acinar, solid	x	x	x	x (batch2)
12	s12B	normal, solid	x	x	x	x (batch2)
13	s13B	normal, papillary, acinar, solid	x	x	x	x (batch2)
