# Supplementary material for: Nongenetic Evolution Drives Lung Adenocarcinoma Spatial Heterogeneity and Progression
Source: Oxford University Press journal article supplement (doi:10.1158/2159-8290.cd-20-1274), 2021-02-09
Supplement: 21598290cd201274-sup-250305_2_supp_6853949_qn4tzl.xlsx [file 21598290cd201274-sup-250305_2_supp_6853949_qn4tzl.xlsx]

## Sheet: Table legend
Supplementary Table 2. Statistical tests and results performed in this study.

## Sheet: Table_S2
Histologic patterns abbreviations: N = normal lung, L = lepidic, P = papillary, A = acinar, S = solid
Significance thresholds for unadjusted p-values: p < 0.05
Significance thresholds for adjusted p-values: FDR < 0.2
Figure	Analysis	Result	Dataset	N	Overall test	Overall test p-value	Post-hoc test (if applicable)	Post-hoc test p-values	Multiple hypothesis correction (if applicable)	Result(s) statistically significant, trend, not significant	Comments
1b	Association between tumor mutational burden and patterns	Significantly different TMB among patterns, with high TMB in solid pattern and low TMB in lepidic pattern. Solid patterns harbors significantly more mutations than each of the other patterns.	TCGA	206	Kruskal-Wallis	0.000297	Dunn	P_adj_AvsS = 0.002, P_adj_LvsS = 0.01, P_adj_PvsS = 0.003, others: ns	Benjamini-Hochberg procedure	Significant	Multiple hypothesis correction was used in the post-hoc Dunn test
	Association between fraction of genome altered (FGA) and patterns	Significantly different FGA among patterns, trend for higher FGA in solid pattern (significant vs papillary and acinar, not significant vs lepidic)	TCGA	201	Kruskal-Wallis	0.03608	Dunn	P_adj_AvsS = 0.04, P_adj_PvsS = 0.09, others: ns	Benjamini-Hochberg procedure	Significant	Multiple hypothesis correction was used in the post-hoc Dunn test
S1c	Association between tumor mutational burden and patterns	Trend for higher TMB in solid pattern	Chen	162	Kruskal-Wallis	0.1067	Dunn	P_adj_AvsS = 0.2, P_adj_LvsS = 0.15, others: ns	Benjamini-Hochberg procedure	Trend	Multiple hypothesis correction was used in the post-hoc Dunn test
S1a	Association between tumor stage and patterns	No association between stage and patterns	TCGA	206	Chi-square	0.84				Not significant	Stages and substages were collapsed into 4 categories (I, II, III, IV)
S1b,d	Association between oncogenic alterations and patterns	Significantly increased frequencies of TP53 alterations in solid pattern (trend confirmed in Chen dataset) and of PIK3CA alterations in lepidic pattern (not confirmed in Chen dataset)	TCGA	206	Chi-square	0.096 (TP53), 0.0004 (PIK3CA)	Pattern showing highest residual was determined	na	Benjamini-Hochberg procedure	Significant	Only alterations found in at least 3 samples were tested
1d,g,h	Association between gene expression and patterns	Several differentially expressed genes	TCGA	205	Multiple linear regression (see Limma documentation)	See Table_S3			Benjamini-Hochberg procedure	See table
1i	Association between differentially expressed genes and Gene Ontology (GO) terms	Enrichment for several GO terms	TCGA	See Table S4	Hypergeometric test (see MSigDB documentation)	See Table_S4			Benjamini-Hochberg procedure	See table
1f	Association between DNA methylation and patterns	Several differentially methylated probes	TCGA	167	Multiple linear regression (see Limma documentation)	See Table_S3			Benjamini-Hochberg procedure	See table
1j	Association between differentially methylated gene promoters and Gene Ontology (GO) terms	Enrichment for several GO terms	TCGA	167	Hypergeometric test (see MSigDB documentation)	See Table_S4			Benjamini-Hochberg procedure	Significant
1k	Association between RNA-based estimation of the abundance of several immune cell types and patterns	The abundance of several immune cell types is significantly different in lepidic vs other patterns	TCGA		Kruskal-Wallis	See figure	Dunn	See figure	Benjamini-Hochberg procedure	See figure	Multiple hypothesis correction was used in the post-hoc Dunn test. Significance symbols shown in figure refer to comparisons between lepidic and all other patterns
S1f	Correlation between Lepidic vs Solid gene expression fold changes in TCGA and Chen dataset	Lepidic vs Solid fold changes are highly correlated between the two datasets	TCGA, Chen	14454 (# genes)	Pearson correlation coefficient	< 2.2e-16				Significant
S1g	Correlation between Lepidic vs Solid gene expression fold changes in TCGA and Ding dataset	Lepidic vs Solid fold changes are highly correlated between the two datasets	TCGA, Ding	11732 (# genes)	Pearson correlation coefficient	< 2.2e-16				Significant
S1h	Association between RNA-based estimation of the abundance of several immune cell types and patterns	The abundance of few immune cell types is significantly different in lepidic vs solid pattern	Chen	169	Kruskal-Wallis	See figure	Dunn	See figure	Benjamini-Hochberg procedure	See figure	Multiple hypothesis correction was used in the post-hoc Dunn test. Significance symbols shown in figure refer to comparisons between lepidic and all other patterns
S2a	Association between patient-normalized regional tumor mutational burden (number of mutations in the region / min(number of mutations across regions of the patient) ) and patterns	Regions annotated to solid pattern tended to have more mutations than regions annotated to other patterns	CHUV	27	Kruskal-Wallis	0.11	Dunn	P_adj_AvsS = 0.2, P_adj_LvsS = 0.2, others: ns	Benjamini-Hochberg procedure	Trend	Multiple hypothesis correction was used in the post-hoc Dunn test
2c	Association between gene expression and patterns, accounting for patient	Several differentially expressed genes	CHUV	29	Multiple linear regression, with Patient as covariate (see Limma documentation)	See Table_S6			Benjamini-Hochberg procedure	See table
S2b	Association between DNA methylation and patterns, accounting for patient	Several differentially methylated probes	CHUV	28	Multiple linear regression, with Patient as covariate (see Limma documentation)	See Table_S6			Benjamini-Hochberg procedure	See table
S2c	Correlation between Lepidic vs Solid gene expression fold changes in TCGA and CHUV dataset	Lepidic vs Solid fold changes are highly correlated between the two datasets	TCGA, CHUV	15110 (# genes)	Pearson correlation coefficient	< 2.2e-16				Significant
S2d	Correlation between Lepidic vs Solid gene expression fold changes in Chen and CHUV dataset	Lepidic vs Solid fold changes are highly correlated between the two datasets	Chen, CHUV	14334 (# genes)	Pearson correlation coefficient	< 2.2e-16				Significant
S2e,2e	Association between RNA-based estimation of the abundance of several immune cell types and patterns	The abundance of a few immune cell types is significantly different in lepidic vs other patterns	CHUV	29	Kruskal-Wallis	See figure	Dunn	See figure	Benjamini-Hochberg procedure	See figure	Multiple hypothesis correction was used in the post-hoc Dunn test. Significance symbols shown in figure refer to comparisons between lepidic and all other patterns
3a	Association between gene expression in single cells and cell type (cancer vs non-cancer), for each patient	Extraction of genes predominantly expressd in cancer cells	Lambrechts et al.	8969 (patient 3), 13751 (patient 4), 6672 (patient 6)	Wilcoxon Rank-Sum test (see Seurat documentation)	See methods			Bonferroni (see Seurat documentation)	See methods
3b	Association between gene expression and patterns (lepidic vs solid), restricting to genes predominantly expressed in cancer cells, accounting for patient	Several differentially expressed genes	CHUV	15	Multiple linear regression (see Limma documentation), including patient as covariate	See figure			Benjamini-Hochberg procedure	See figure
3c	Association between differentially expressed genes and Gene Ontology (GO) terms	Enrichment for several GO terms	CHUV	See Table S8	Hypergeometric test (see MSigDB documentation)	See Table_S8			Benjamini-Hochberg procedure	See table
3e	Correlation between normalized enrichment score of transcriptional regulators in CHUV and TCGA datasets	Strong correlation between the two	CHUV, TCGA	425	Pearson correlation coefficient	< 2.2e-16				Significant
3g	Association between survival and binarized lepidic-to-solid signature scores	Solid-like tumor samples have a significantly worse survival than lepidic-like samples	TCGA	258	Chi-square	7.9e-06				Significant
3h,S3e	Association between survival and continuous lepidic-to-solid signature scores across multiple datasets controlling for sex, age and stage	Significant association in all but one datasets	See figures	See figures	Cox regression	See figures				See figures
3d	Association between survival and histologic pattern annotation	Not significant	TCGA	206	Chi-square	0.4				Not significant
3i	Correlation between lepidic-to-solid signature scores and predicted prevalence of non-tumor cell types in multiple datasets	See figure	See figure	See figure	Pearson correlation coefficient	See figure				See figure
4e, Ki-67	Association between density of Ki-67-positive cells in each pixel and pattern annotation of pixels	Solid-annotated pixels harbored significantly higher densities of Ki-67-positive cells	CHUV	54037	Kruskal-Wallis	< 2.2e-16	Dunn	All comparisons had adjusted p-value < 1e-06	Benjamini-Hochberg procedure	Significant	Multiple hypothesis correction was used in the post-hoc Dunn test. P-values are inflated by the high number of data points, however results were reproducible across different pixel sizes
4e, CD4	Association between density of CD4-positive cells in each pixel and pattern annotation of pixels	Acinar-annotated pixels harbored significantly higher densities of CD4-positive cells	CHUV	54037	Kruskal-Wallis	< 2.2e-16	Dunn	All comparisons had adjusted p-value < 1e-06	Benjamini-Hochberg procedure	Significant	Multiple hypothesis correction was used in the post-hoc Dunn test. P-values are inflated by the high number of data points, however results were reproducible across different pixel sizes
4e, CD8	Association between density of CD8-positive cells in each pixel and pattern annotation of pixels	Acinar-annotated pixels harbored significantly higher densities of CD8-positive cells	CHUV	54037	Kruskal-Wallis	< 2.2e-16	Dunn	All comparisons had adjusted p-value < 1e-06, except P_adj_LvsN = 0.01	Benjamini-Hochberg procedure	Significant	Multiple hypothesis correction was used in the post-hoc Dunn test. P-values are inflated by the high number of data points, however results were reproducible across different pixel sizes
4e, CD20	Association between density of CD20-positive cells in each pixel and pattern annotation of pixels	Acinar-annotated pixels harbored significantly higher densities of CD20-positive cells	CHUV	54037	Kruskal-Wallis	< 2.2e-16	Dunn	All comparisons had adjusted p-value < 1e-06	Benjamini-Hochberg procedure	Significant	Multiple hypothesis correction was used in the post-hoc Dunn test. P-values are inflated by the high number of data points, however results were reproducible across different pixel sizes
4e, CD68	Association between density of CD68-positive cells in each pixel and pattern annotation of pixels	Acinar-annotated pixels harbored significantly higher densities of CD68-positive cells	CHUV	54037	Kruskal-Wallis	< 2.2e-16	Dunn	All comparisons had adjusted p-value < 1e-06, except P_adj_LvsP (ns)	Benjamini-Hochberg procedure	Significant	Multiple hypothesis correction was used in the post-hoc Dunn test. P-values are inflated by the high number of data points, however results were reproducible across different pixel sizes
4g	Association between density of Tertiary Lymphoid Structures (TLSs) in each region and pattern annotation of regions	Acinar-annotated regions harbored significantly higher densities of TLSs (ns vs Papillary)	CHUV	44	Kruskal-Wallis	2.271e-06	Dunn	P_adj_AvsL = 0.0006, P_adj_AvsN = 0.000002, P_adj_LvsN = ns, P_adj_AvsP = ns, P_adj_LvsP = 0.13, P_adj_NvsP = 0.09, P_adj_AvsS 0.13, P_adj_LvsS = 0.17, P_adj_NvsS = 0.13, P_adj_PvsS = ns	Benjamini-Hochberg procedure	Significant	Multiple hypothesis correction was used in the post-hoc Dunn test
4h	Colocalization of TTF1+ and TTF1- cells across patterns	Colocalization of TTF1+ and TTF1- is significantly lower in solid pattern	CHUV	45	Spearman correlation coefficient, Kruskal-Wallis	0.0000005968 (Kruskal-Wallis test)	Dunn	P_adj_AvsL = 0.09, P_adj_AvsN = 0.00003, P_adj_LvsN = 0.18, P_adj_AvsP = ns, P_adj_LvsP = 0.16, P_adj_NvsP = 0.008, P_adj_AvsS 0.17, P_adj_LvsS = 0.007, P_adj_NvsS = 0.00002, P_adj_PvsS = 0.19	Benjamini-Hochberg procedure	Significant	Multiple hypothesis correction was used in the post-hoc Dunn test
4l, Ki-67	Association between density of Ki-67-positive cells in pixel located in periphery (distance from boundary: 0-0.5 mm, inside) vs core (distance from boundary: > 1 mm, inside) of solid pattern regions	No recurrent significant association in observed	CHUV	8505 (sample 7C), 3965 (8B), 13170 (11C), 8265 (12B), 22905 (13B)	Negative Binomial Generalized Linear Model	Pval_7C = ns, Pval_8B < 1e-06, Pval_11C = 0.00003, Pval_12B = 0.00003, Pval_13B < 1e-06				Not significant (opposite trends in different samples)	Samples: 7C, 8B, 11C, 12B, 13B
4l, CD4	Association between density of CD4-positive cells in pixel located in periphery (distance from boundary: 0-0.5 mm, inside) vs core (distance from boundary: > 1 mm, inside) of solid pattern regions	Density of CD4-positive cells is significantly higher in periphery than in core across all samples	CHUV	8505 (sample 7C), 3965 (8B), 13170 (11C), 8265 (12B), 22905 (13B)	Negative Binomial Generalized Linear Model	Pval_7C = ns, Pval_8B < 1e-06, Pval_11C = 0.0002, Pval_12B < 1e-06, Pval_13B < 1e-06				Significant	Samples: 7C, 8B, 11C, 12B, 13B
4l, CD8	Association between density of CD8-positive cells in pixel located in periphery (distance from boundary: 0-0.5 mm, inside) vs core (distance from boundary: > 1 mm, inside) of solid pattern regions	Density of CD8-positive cells is significantly higher in periphery than in core across all samples	CHUV	8505 (sample 7C), 3965 (8B), 13170 (11C), 8265 (12B), 22905 (13B)	Negative Binomial Generalized Linear Model	Pval_7C = ns, Pval_8B < 1e-06, Pval_11C = 0.0002, Pval_12B = 0.0002, Pval_13B < 1e-06				Significant	Samples: 7C, 8B, 11C, 12B, 13B
4l, CD20	Association between density of CD20-positive cells in pixel located in periphery (distance from boundary: 0-0.5 mm, inside) vs core (distance from boundary: > 1 mm, inside) of solid pattern regions	Density of CD20-positive cells is significantly higher in periphery than in core across all samples (except 11C)	CHUV	8505 (sample 7C), 3965 (8B), 13170 (11C), 8265 (12B), 22905 (13B)	Negative Binomial Generalized Linear Model	Pval_7C = ns, Pval_8B < 1e-06, Pval_11C = ns, Pval_12B < 1e-06, Pval_13B < 1e-06				Significant (all except sample 11C)	Samples: 7C, 8B, 11C, 12B, 13B
4l, CD68	Association between density of CD68-positive cells in pixel located in periphery (distance from boundary: 0-0.5 mm, inside) vs core (distance from boundary: > 1 mm, inside) of solid pattern regions	Density of CD68-positive cells is significantly higher in periphery than in core across all samples	CHUV	8505 (sample 7C), 3965 (8B), 13170 (11C), 8265 (12B), 22905 (13B)	Negative Binomial Generalized Linear Model	Pval_7C = ns, Pval_8B < 1e-06, Pval_11C = 0.0002, Pval_12B < 1e-06, Pval_13B < 1e-06				Significant	Samples: 7C, 8B, 11C, 12B, 13B
S4a	Correlation between Ki-67+ and TTF1+ cell densities (log10-scale) across regions	Ki-67+ and TTF1+ cell densities are correlated	CHUV	30	Pearson correlation coefficient	0.008656				Significant
5c	Association between DSP protein expression levels (SNR) in ROIs located in periphery vs center of solid pattern region	Some immune-related proteins show significantly higher levels in the periphery, whereas some tumor-related proteins show significantly higher levels in the center	CHUV	6	T-test	See figure			Benjamini-Hochberg procedure	See figure
5f	Association between DSP protein expression levels (SNR) in CD45+ AOIs located in periphery vs center of solid pattern regions, accounting for sample	Some markers associated with regulatory T cells are upregulated in CD45+ AOIs located in the center.	CHUV	26	Two-way ANOVA (independent variables: Sample, location)	See figure			Benjamini-Hochberg procedure	See figure
5e	Association between DSP protein expression levels (SNR) in PanCK+ AOIs located in periphery vs center of solid pattern regions, accounting for sample	A few markers were differentially regulated (see figure)	CHUV	26	Two-way ANOVA (independent variables: Sample, location)	See figure			Benjamini-Hochberg procedure	See figure
