# Supplementary material for: Nongenetic Evolution Drives Lung Adenocarcinoma Spatial Heterogeneity and Progression
Source: Oxford University Press journal article supplement (doi:10.1158/2159-8290.cd-20-1274), 2021-02-09
Supplement: 21598290cd201274-sup-250305_2_supp_6853951_qn4tzl.xlsx [file 21598290cd201274-sup-250305_2_supp_6853951_qn4tzl.xlsx]

## Sheet: Table legend
Supplementary Table 4. Gene ontology categories showing significant enrichment of genes overexpressed in lepidic samples or in solid samples or targeted by promoter hypermethylation in lepidic samples or in solid samples.

## Sheet: over-expressed in lepidic
Gene Set Name	# Genes in Gene Set (K)	Description	# Genes in Overlap (k)	k/K	p-value	FDR q-value
GO_NEUROGENESIS	1625	Generation of cells within the nervous system. [GO_REF:0000021, GOC:cls, GOC:curators, GOC:dgh, GOC:dph, GOC:jid, GOC:mtg_15jun06]	62	0.0382	3.92e-15	3.6e-11
GO_CELLULAR_COMPONENT_MORPHOGENESIS	1141	The process in which cellular structures, including whole cells or cell parts, are generated and organized. [GOC:dph, GOC:mah, GOC:tb]	44	0.0386	3.66e-11	1.12e-07
GO_REGULATION_OF_CELL_DIFFERENTIATION	1881	Any process that modulates the frequency, rate or extent of cell differentiation, the process in which relatively unspecialized cells acquire specialized structural and functional features. [GOC:go_curators]	59	0.0314	6.09e-11	1.4e-07
GO_CELL_PROJECTION_ORGANIZATION	1545	A process that is carried out at the cellular level which results in the assembly, arrangement of constituent parts, or disassembly of a prolongation or process extending from a cell, e.g. a flagellum or axon. [GOC:jl, GOC:mah, http://www.cogsci.princeton.edu/~wn/]	52	0.0337	7.91e-11	1.45e-07
GO_POSITIVE_REGULATION_OF_DEVELOPMENTAL_PROCESS	1428	Any process that activates or increases the rate or extent of development, the biological process whose specific outcome is the progression of an organism over time from an initial condition (e.g. a zygote, or a young adult) to a later condition (e.g. a multicellular animal or an aged adult). [GOC:ai]	47	0.0329	1.4e-09	1.29e-06
GO_TISSUE_MORPHOGENESIS	670	The process in which the anatomical structures of a tissue are generated and organized. [GOC:dph, GOC:jid]	29	0.0433	7.41e-09	3.99e-06
GO_NEURON_DIFFERENTIATION	1365	The process in which a relatively unspecialized cell acquires specialized features of a neuron. [GOC:mah]	49	0.0359	3.24e-11	1.12e-07
GO_RESPONSE_TO_ENDOGENOUS_STIMULUS	1721	Any process that results in a change in state or activity of a cell or an organism (in terms of movement, secretion, enzyme production, gene expression, etc.) as a result of a stimulus arising within the organism. [GOC:sm]	55	0.032	1.47e-10	2.25e-07
GO_OSSIFICATION	396	The formation of bone or of a bony substance, or the conversion of fibrous tissue or of cartilage into bone or a bony substance. [GOC:mtg_mpo, PMID:17572649]	24	0.0606	2.25e-10	2.96e-07
GO_MICROTUBULE_BASED_MOVEMENT	283	A microtubule-based process that results in the movement of organelles, other microtubules, or other cellular components. Examples include motor-driven movement along microtubules and movement driven by polymerization or depolymerization of microtubules. [GOC:cjm, ISBN:0815316194]	20	0.0707	5.15e-10	5.91e-07
GO_TRANSMEMBRANE_TRANSPORT	1604	The process in which a solute is transported across a lipid bilayer, from one side of a membrane to the other. [GOC:dph, GOC:jid]	51	0.0318	8.63e-10	8.82e-07
GO_CILIUM_MOVEMENT	73	The directed, self-propelled movement of a cilium. [GOC:dph, GOC:jl]	11	0.1507	1.61e-09	1.35e-06
GO_CELLULAR_RESPONSE_TO_ENDOGENOUS_STIMULUS	1454	Any process that results in a change in state or activity of a cell (in terms of movement, secretion, enzyme production, gene expression, etc.) as a result of a stimulus arising within the organism. [GOC:mah]	47	0.0323	2.48e-09	1.9e-06
GO_OSTEOBLAST_DIFFERENTIATION	223	The process whereby a relatively unspecialized cell acquires the specialized features of an osteoblast, a mesodermal or neural crest cell that gives rise to bone. [CL:0000062, GO_REF:0000034, GOC:jid]	17	0.0762	3.29e-09	2.33e-06
GO_REGULATION_OF_MEMBRANE_POTENTIAL	435	Any process that modulates the establishment or extent of a membrane potential, the electric potential existing across any membrane arising from charges in the membrane itself and from the charges present in the media on either side of the membrane. [GOC:jl, GOC:mtg_cardio, GOC:tb, ISBN:0198506732]	23	0.0529	7.21e-09	3.99e-06
GO_NEURON_DEVELOPMENT	1114	The process whose specific outcome is the progression of a neuron over time, from initial commitment of the cell to a specific fate, to the fully functional differentiated cell. [GOC:dph]	39	0.035	7.32e-09	3.99e-06
GO_UROGENITAL_SYSTEM_DEVELOPMENT	331	The process whose specific outcome is the progression of the urogenital system over time, from its formation to the mature structure. [GOC:go_curators]	20	0.0604	7.6e-09	3.99e-06
GO_ANIMAL_ORGAN_MORPHOGENESIS	1071	Morphogenesis of an animal organ. An organ is defined as a tissue or set of tissues that work together to perform a specific function or functions. Morphogenesis is the process in which anatomical structures are generated and organized. Organs are commonly observed as visibly distinct structures, but may also exist as loosely associated clusters of cells that work together to perform a specific f…	38	0.0355	8.07e-09	3.99e-06
GO_CELL_CELL_SIGNALING	1665	Any process that mediates the transfer of information from one cell to another. This process includes signal transduction in the receiving cell and, where applicable, release of a ligand and any processes that actively facilitate its transport and presentation to the receiving cell. Examples include signaling via soluble ligands, via cell adhesion molecules and via gap junctions. [GOC:dos, GOC:ma…	50	0.03	8.24e-09	3.99e-06
GO_ACTIN_FILAMENT_BASED_PROCESS	766	Any cellular process that depends upon or alters the actin cytoskeleton, that part of the cytoskeleton comprising actin filaments and their associated proteins. [GOC:mah]	31	0.0405	1.06e-08	4.88e-06
GO_AXON_DEVELOPMENT	523	The progression of an axon over time. Covers axonogenesis (de novo generation of an axon) and axon regeneration (regrowth), as well as processes pertaining to the progression of the axon over time (fasciculation and defasciculation). [GOC:dph, GOC:pg, GOC:pr]	25	0.0478	1.2e-08	5.23e-06
GO_CYTOSKELETON_ORGANIZATION	1335	A process that is carried out at the cellular level which results in the assembly, arrangement of constituent parts, or disassembly of cytoskeletal structures. [GOC:dph, GOC:jl, GOC:mah]	43	0.0322	1.37e-08	5.61e-06
GO_POSITIVE_REGULATION_OF_CELL_DIFFERENTIATION	1000	Any process that activates or increases the frequency, rate or extent of cell differentiation. [GOC:go_curators]	36	0.036	1.4e-08	5.61e-06
GO_ENZYME_LINKED_RECEPTOR_PROTEIN_SIGNALING_PATHWAY	1051	Any series of molecular signals initiated by the binding of an extracellular ligand to a receptor on the surface of the target cell, where the receptor possesses catalytic activity or is closely associated with an enzyme such as a protein kinase, and ending with regulation of a downstream cellular process, e.g. transcription. [GOC:mah, GOC:signaling, ISBN:0815316194]	37	0.0352	1.57e-08	5.99e-06
GO_CALCIUM_ION_BINDING	701	Interacting selectively and non-covalently with calcium ions (Ca2+). [GOC:ai]	29	0.0414	1.99e-08	7.32e-06
GO_MICROTUBULE_BUNDLE_FORMATION	93	A process that results in a parallel arrangement of microtubules. [GOC:dph]	11	0.1183	2.22e-08	7.66e-06
GO_CELL_MORPHOGENESIS_INVOLVED_IN_DIFFERENTIATION	748	The change in form (cell shape and size) that occurs when relatively unspecialized cells, e.g. embryonic or regenerative cells, acquire specialized structural and/or functional features that characterize the cells, tissues, or organs of the mature organism or some other relatively stable phase of the organism's life history. [GOC:go_curators]	30	0.0401	2.25e-08	7.66e-06
GO_MICROTUBULE_BASED_PROCESS	752	Any cellular process that depends upon or alters the microtubule cytoskeleton, that part of the cytoskeleton comprising microtubules and their associated proteins. [GOC:mah]	30	0.0399	2.53e-08	8.31e-06
GO_EPITHELIAL_TUBE_MORPHOGENESIS	327	The process in which the anatomical structures of a tube are generated and organized from an epithelium. Epithelial tubes transport gases, liquids and cells from one site to another and form the basic structure of many organs and tissues, with tube shape and organization varying from the single-celled excretory organ in Caenorhabditis elegans to the branching trees of the mammalian kidney and ins…	19	0.0581	3.36e-08	1.01e-05
GO_PASSIVE_TRANSMEMBRANE_TRANSPORTER_ACTIVITY	473	Enables the transfer of a single solute from one side of a membrane to the other by a mechanism involving conformational change, either by facilitated diffusion or in a membrane potential dependent process if the solute is charged. [GOC:mtg_transport, ISBN:0815340729]	23	0.0486	3.38e-08	1.01e-05
GO_RENAL_SYSTEM_DEVELOPMENT	294	The process whose specific outcome is the progression of the renal system over time, from its formation to the mature structure. The renal system maintains fluid balance and contributes to electrolyte balance, acid/base balance, and disposal of nitrogenous waste products. In humans, the renal system comprises a pair of kidneys, a pair of ureters, urinary bladder, urethra, sphincter muscle and ass…	18	0.0612	3.5e-08	1.01e-05
GO_GROWTH	990	The increase in size or mass of an entire organism, a part of an organism or a cell. [GOC:bf, GOC:ma]	35	0.0354	3.5e-08	1.01e-05
GO_DRUG_METABOLIC_PROCESS	600	The chemical reactions and pathways involving a drug, a substance used in the diagnosis, treatment or prevention of a disease; as used here antibiotic substances (see antibiotic metabolism) are considered to be drugs, even if not used in medical or veterinary practice. [GOC:cab2]	26	0.0433	4.38e-08	1.22e-05
GO_TUBE_FORMATION	149	Creation of the central hole of a tube in an anatomical structure through which gases and/or liquids flow. [GOC:bf]	13	0.0872	4.78e-08	1.26e-05
GO_POSITIVE_REGULATION_OF_SIGNALING	1869	Any process that activates, maintains or increases the frequency, rate or extent of a signaling process. [GOC:mtg_signal]	52	0.0278	4.84e-08	1.26e-05
GO_EPITHELIUM_DEVELOPMENT	1296	The process whose specific outcome is the progression of an epithelium over time, from its formation to the mature structure. An epithelium is a tissue that covers the internal or external surfaces of an anatomical structure. [GOC:dph, GOC:mtg_lung]	41	0.0316	4.93e-08	1.26e-05
GO_REGULATION_OF_PHOSPHORUS_METABOLIC_PROCESS	1823	Any process that modulates the frequency, rate or extent of the chemical reactions and pathways involving phosphorus or compounds containing phosphorus. [GOC:ai]	51	0.028	5.55e-08	1.38e-05
GO_POSITIVE_REGULATION_OF_MULTICELLULAR_ORGANISMAL_PROCESS	1825	Any process that activates or increases the frequency, rate or extent of an organismal process, any of the processes pertinent to the function of an organism above the cellular level; includes the integrated processes of tissues and organs. [GOC:ai]	51	0.0279	5.74e-08	1.39e-05
GO_TRANSPORTER_ACTIVITY	1173	Enables the directed movement of substances (such as macromolecules, small molecules, ions) into, out of or within a cell, or between cells. [GOC:ai, GOC:dgf]	38	0.0324	8.56e-08	2.02e-05
GO_TRANSMEMBRANE_RECEPTOR_PROTEIN_SERINE_THREONINE_KINASE_SIGNALING_PATHWAY	348	A series of molecular signals initiated by the binding of an extracellular ligand to a receptor on the surface of the target cell where the receptor possesses serine/threonine kinase activity, and ending with regulation of a downstream cellular process, e.g. transcription. [GOC:mah, GOC:signaling]	19	0.0546	8.94e-08	2.05e-05
GO_ION_TRANSPORT	1692	The directed movement of charged atoms or small charged molecules into, out of or within a cell, or between cells, by means of some agent such as a transporter or pore. [GOC:ai]	48	0.0284	9.33e-08	2.09e-05
GO_MORPHOGENESIS_OF_AN_EPITHELIUM	544	The process in which the anatomical structures of epithelia are generated and organized. An epithelium consists of closely packed cells arranged in one or more layers, that covers the outer surfaces of the body or lines any internal cavity or tube. [GOC:dph, GOC:jl, GOC:tb, ISBN:0198506732]	24	0.0441	1.04e-07	2.29e-05
GO_CENTRAL_NERVOUS_SYSTEM_DEVELOPMENT	995	The process whose specific outcome is the progression of the central nervous system over time, from its formation to the mature structure. The central nervous system is the core nervous system that serves an integrating and coordinating function. In vertebrates it consists of the brain and spinal cord. In those invertebrates with a central nervous system it typically consists of a brain, cerebral…	34	0.0342	1.23e-07	2.63e-05
GO_CELL_MORPHOGENESIS_INVOLVED_IN_NEURON_DIFFERENTIATION	592	The process in which the structures of a neuron are generated and organized. This process occurs while the initially relatively unspecialized cell is acquiring the specialized features of a neuron. [GOC:dph, GOC:tb]	25	0.0422	1.3e-07	2.66e-05
GO_LOCOMOTION	1984	Self-propelled movement of a cell or organism from one location to another. [GOC:dgh]	53	0.0267	1.3e-07	2.66e-05
GO_RESPONSE_TO_GROWTH_FACTOR	732	Any process that results in a change in state or activity of a cell or an organism (in terms of movement, secretion, enzyme production, gene expression, etc.) as a result of a growth factor stimulus. [GOC:BHF, GOC:mah]	28	0.0383	1.76e-07	3.51e-05
GO_CELL_PART_MORPHOGENESIS	691	The process in which the anatomical structures of a cell part are generated and organized. [GOC:mah]	27	0.0391	1.92e-07	3.76e-05
GO_HEART_PROCESS	295	A circulatory system process carried out by the heart. The heart is a hollow, muscular organ, which, by contracting rhythmically, keeps up the circulation of the blood. The heart is a hollow, muscular organ, which, by contracting rhythmically, keeps up the circulation of the blood. [GOC:mtg_cardio]	17	0.0576	1.99e-07	3.81e-05
GO_TUBE_DEVELOPMENT	1122	The process whose specific outcome is the progression of a tube over time, from its initial formation to a mature structure. Epithelial and endothelial tubes transport gases, liquids and cells from one site to another and form the basic structure of many organs and tissues including lung and trachea, kidney, the mammary gland, the vascular system and the gastrointestinal and urinary-genital tract…	36	0.0321	2.38e-07	4.43e-05
GO_REGULATION_OF_ION_TRANSPORT	699	Any process that modulates the frequency, rate or extent of the directed movement of charged atoms or small charged molecules into, out of or within a cell, or between cells, by means of some agent such as a transporter or pore. [GOC:jl]	27	0.0386	2.41e-07	4.43e-05
GO_REGULATION_OF_SYSTEM_PROCESS	614	Any process that modulates the frequency, rate or extent of a system process, a multicellular organismal process carried out by any of the organs or tissues in an organ system. [GOC:jl]	25	0.0407	2.57e-07	4.63e-05
GO_REGULATION_OF_PROTEIN_MODIFICATION_PROCESS	1880	Any process that modulates the frequency, rate or extent of the covalent alteration of one or more amino acid residues within a protein. [GOC:mah, GOC:tb]	50	0.0266	3.46e-07	6.11e-05
GO_SIGNALING_RECEPTOR_BINDING	1611	Interacting selectively and non-covalently with one or more specific sites on a receptor molecule, a macromolecule that undergoes combination with a hormone, neurotransmitter, drug or intracellular messenger to initiate a change in cell function. [GOC:bf, GOC:ceb, ISBN:0198506732]	45	0.0279	3.7e-07	6.41e-05
GO_REGULATION_OF_TRANSMEMBRANE_RECEPTOR_PROTEIN_SERINE_THREONINE_KINASE_SIGNALING_PATHWAY	242	Any process that modulates the rate, frequency, or extent of the series of molecular signals generated as a consequence of a transmembrane receptor serine/threonine kinase binding to its physiological ligand. [GOC:dph, GOC:tb]	15	0.062	4.12e-07	6.92e-05
GO_LIPID_METABOLIC_PROCESS	1405	The chemical reactions and pathways involving lipids, compounds soluble in an organic solvent but not, or sparingly, in an aqueous solvent. Includes fatty acids; neutral fats, other fatty-acid esters, and soaps; long-chain (fatty) alcohols and waxes; sphingoids and other long-chain bases; glycolipids, phospholipids and sphingolipids; and carotenes, polyprenols, sterols, terpenes and other isopren…	41	0.0292	4.14e-07	6.92e-05
GO_DEVELOPMENTAL_GROWTH	677	The increase in size or mass of an entire organism, a part of an organism or a cell, where the increase in size or mass has the specific outcome of the progression of the organism over time from one condition to another. [GOC:go_curators]	26	0.0384	4.5e-07	7.38e-05
GO_CHEMICAL_HOMEOSTASIS	1207	Any biological process involved in the maintenance of an internal steady state of a chemical. [GOC:isa_complete]	37	0.0307	4.87e-07	7.85e-05
GO_SMALL_MOLECULE_METABOLIC_PROCESS	1962	The chemical reactions and pathways involving small molecules, any low molecular weight, monomeric, non-encoded molecule. [GOC:curators, GOC:pde, GOC:vw]	51	0.026	5.17e-07	8.2e-05
GO_RESPONSE_TO_TRANSFORMING_GROWTH_FACTOR_BETA	248	Any process that results in a change in state or activity of a cell or an organism (in terms of movement, secretion, enzyme production, gene expression, etc.) as a result of a transforming growth factor beta stimulus. [GOC:mah]	15	0.0605	5.63e-07	8.77e-05
GO_BIOLOGICAL_ADHESION	1425	The attachment of a cell or organism to a substrate, another cell, or other organism. Biological adhesion includes intracellular attachment between membrane regions. [GOC:isa_complete]	41	0.0288	5.94e-07	9.1e-05
GO_EMBRYO_DEVELOPMENT	1029	The process whose specific outcome is the progression of an embryo from its formation until the end of its embryonic life stage. The end of the embryonic stage is organism-specific. For example, for mammals, the process would begin with zygote formation and end with birth. For insects, the process would begin at zygote formation and end with larval hatching. For plant zygotic embryos, this would …	33	0.0321	7.75e-07	0.000117
GO_CELLULAR_MODIFIED_AMINO_ACID_METABOLIC_PROCESS	191	The chemical reactions and pathways involving compounds derived from amino acids, organic acids containing one or more amino substituents. [GOC:ai]	13	0.0681	8.53e-07	0.000126
GO_BIOMINERALIZATION	162	The process where mineral crystals are formed and deposited in an organized fashion in a matrix (either cellular or extracellular) by living organisms. This gives rise to inorganic compound-based structures such as skeleton, teeth, ivory, shells, cuticle, and corals as well as bacterial biomineralization products. [GOC:aa, PMID:24395694, PMID:28229486]	12	0.0741	9.21e-07	0.000134
GO_PATTERN_SPECIFICATION_PROCESS	446	Any developmental process that results in the creation of defined areas or spaces within an organism to which cells respond and eventually are instructed to differentiate. [GOC:go_curators, GOC:isa_complete, ISBN:0521436125]	20	0.0448	9.4e-07	0.000135
GO_REGULATION_OF_TRANSMEMBRANE_TRANSPORT	573	Any process that modulates the frequency, rate or extent of the directed movement of a solute from one side of a membrane to the other. [GOC:mah]	23	0.0401	9.87e-07	0.00014
GO_REGULATION_OF_TRANSPORT	1894	Any process that modulates the frequency, rate or extent of the directed movement of substances (such as macromolecules, small molecules, ions) into, out of or within a cell, or between cells, by means of some agent such as a transporter or pore. [GOC:ai]	49	0.0259	1.01e-06	0.00014
GO_REGULATION_OF_BLOOD_CIRCULATION	299	Any process that modulates the frequency, rate or extent of blood circulation. [GO_REF:0000058, GOC:mr, GOC:TermGenie, PMID:10659969]	16	0.0535	1.21e-06	0.000165
GO_VOLTAGE_GATED_ION_CHANNEL_ACTIVITY	198	Enables the transmembrane transfer of an ion by a voltage-gated channel. An ion is an atom or group of atoms carrying an electric charge by virtue of having gained or lost one or more electrons. A voltage-gated channel is a channel whose open state is dependent on the voltage across the membrane in which it is embedded. [GOC:mtg_transport, ISBN:0198506732, ISBN:0815340729]	13	0.0657	1.28e-06	0.000173
GO_REGENERATION	199	The regrowth of a lost or destroyed body part, such as an organ or tissue. This process may occur via renewal, repair, and/or growth alone (i.e. increase in size or mass). [GOC:mah, GOC:pr]	13	0.0653	1.35e-06	0.00018
GO_BONE_MINERALIZATION	112	The deposition of hydroxyapatite, a form of calcium phosphate with the formula Ca10(PO4)6(OH)2, in bone tissue. [GOC:mah, PMID:22936354]	10	0.0893	1.37e-06	0.000181
GO_FATTY_ACID_DERIVATIVE_METABOLIC_PROCESS	169	The chemical reactions and pathways involving fatty acid derivative. [GOC:pr, GOC:TermGenie]	12	0.071	1.44e-06	0.000185
GO_REGULATION_OF_INTRACELLULAR_SIGNAL_TRANSDUCTION	1863	Any process that modulates the frequency, rate or extent of intracellular signal transduction. [GOC:dph, GOC:signaling, GOC:tb, GOC:TermGenie]	48	0.0258	1.46e-06	0.000185
GO_KIDNEY_EPITHELIUM_DEVELOPMENT	140	The process whose specific outcome is the progression of an epithelium in the kidney over time, from its formation to the mature structure. An epithelium is a tissue that covers the internal or external surfaces of an anatomical structure. [GOC:mtg_kidney_jan10]	11	0.0786	1.47e-06	0.000185
GO_HEART_DEVELOPMENT	589	The process whose specific outcome is the progression of the heart over time, from its formation to the mature structure. The heart is a hollow, muscular organ, which, by contracting rhythmically, keeps up the circulation of the blood. [GOC:jid, UBERON:0000948]	23	0.039	1.57e-06	0.000195
GO_GATED_CHANNEL_ACTIVITY	343	Enables the transmembrane transfer of a solute by a channel that opens in response to a specific stimulus. [GOC:mtg_transport]	17	0.0496	1.61e-06	0.000197
GO_ION_TRANSMEMBRANE_TRANSPORTER_ACTIVITY	873	Enables the transfer of an ion from one side of a membrane to the other. [GOC:dgf, GOC:mtg_transport, ISBN:0815340729]	29	0.0332	1.85e-06	0.000223
GO_CONNECTIVE_TISSUE_DEVELOPMENT	274	The progression of a connective tissue over time, from its formation to the mature structure. [GOC:BHF]	15	0.0547	1.96e-06	0.000233
GO_MOLECULAR_TRANSDUCER_ACTIVITY	1495	A compound molecular function in which an effector function is controlled by one or more regulatory components. [GOC:dos, GOC:pdt]	41	0.0274	1.97e-06	0.000233
GO_MUSCLE_SYSTEM_PROCESS	470	A organ system process carried out at the level of a muscle. Muscle tissue is composed of contractile cells or fibers. [GOC:mtg_cardio]	20	0.0426	2.09e-06	0.000243
GO_SMAD_PROTEIN_SIGNAL_TRANSDUCTION	71	The cascade of processes by which a signal interacts with a receptor, causing a change in the activity of a SMAD protein, and ultimately effecting a change in the functioning of the cell. [GOC:BHF, GOC:dph, GOC:tb]	8	0.1127	2.74e-06	0.000314
GO_BRANCHING_MORPHOGENESIS_OF_AN_EPITHELIAL_TUBE	151	The process in which the anatomical structures of branches in an epithelial tube are generated and organized. A tube is a long hollow cylinder. [GOC:dgh, GOC:dph, GOC:jid]	11	0.0728	3.08e-06	0.000345
GO_MORPHOGENESIS_OF_EMBRYONIC_EPITHELIUM	151	The process in which the anatomical structures of embryonic epithelia are generated and organized. [GOC:jl]	11	0.0728	3.08e-06	0.000345
GO_NEGATIVE_REGULATION_OF_DEVELOPMENTAL_PROCESS	1047	Any process that stops, prevents or reduces the rate or extent of development, the biological process whose specific outcome is the progression of an organism over time from an initial condition (e.g. a zygote, or a young adult) to a later condition (e.g. a multicellular animal or an aged adult). [GOC:ai]	32	0.0306	3.12e-06	0.000346
GO_COENZYME_BINDING	287	Interacting selectively and non-covalently with a coenzyme, any of various nonprotein organic cofactors that are required, in addition to an enzyme and a substrate, for an enzymatic reaction to proceed. [ISBN:0198506732]	15	0.0523	3.45e-06	0.000374
GO_REGULATION_OF_ION_TRANSMEMBRANE_TRANSPORT	486	Any process that modulates the frequency, rate or extent of the directed movement of ions from one side of a membrane to the other. [GOC:mah]	20	0.0412	3.46e-06	0.000374
GO_PROTEIN_HOMODIMERIZATION_ACTIVITY	854	Interacting selectively and non-covalently with an identical protein to form a homodimer. [GOC:jl]	28	0.0328	3.56e-06	0.00038
GO_REGULATION_OF_CELL_DEVELOPMENT	955	Any process that modulates the rate, frequency or extent of the progression of the cell over time, from its formation to the mature structure. Cell development does not include the steps involved in committing a cell to a specific fate. [GOC:dph, GOC:tb]	30	0.0314	3.73e-06	0.000386
GO_CARDIAC_MUSCLE_CELL_ACTION_POTENTIAL	74	An action potential that occurs in a cardiac muscle cell. [GOC:BHF, GOC:mtg_cardiac_conduct_nov11]	8	0.1081	3.75e-06	0.000386
GO_SULFUR_COMPOUND_BINDING	253	Interacting selectively and non-covalently with a sulfur compound. [GOC:pr, GOC:TermGenie]	14	0.0553	3.78e-06	0.000386
GO_ION_TRANSMEMBRANE_TRANSPORT	1160	A process in which an ion is transported across a membrane. [GOC:mah]	34	0.0293	3.78e-06	0.000386
GO_ORGANIC_ACID_METABOLIC_PROCESS	1164	The chemical reactions and pathways involving organic acids, any acidic compound containing carbon in covalent linkage. [ISBN:0198506732]	34	0.0292	4.07e-06	0.000411
GO_MESONEPHROS_DEVELOPMENT	101	The process whose specific outcome is the progression of the mesonephros over time, from its formation to the mature structure. In mammals, the mesonephros is the second of the three embryonic kidneys to be established and exists only transiently. In lower vertebrates such as fish and amphibia, the mesonephros will form the mature kidney. [GOC:dph, ISBN:0124020607, ISBN:0721662544, PMID:10535314]	9	0.0891	4.72e-06	0.000471
GO_CIRCULATORY_SYSTEM_DEVELOPMENT	1175	The process whose specific outcome is the progression of the circulatory system over time, from its formation to the mature structure. The circulatory system is the organ system that passes nutrients (such as amino acids and electrolytes), gases, hormones, blood cells, etc. to and from cells in the body to help fight diseases and help stabilize body temperature and pH to maintain homeostasis. [GO…	34	0.0289	4.97e-06	0.000491
GO_HEAD_DEVELOPMENT	774	The biological process whose specific outcome is the progression of a head from an initial condition to its mature state. The head is the anterior-most division of the body. [GOC:dph]	26	0.0336	5.18e-06	0.000504
GO_DRUG_BINDING	1724	Interacting selectively and non-covalently with a drug, any naturally occurring or synthetic substance, other than a nutrient, that, when administered or applied to an organism, affects the structure or functioning of the organism; in particular, any such substance used in the diagnosis, prevention, or treatment of disease. [GOC:jl, ISBN:0198506732]	44	0.0255	5.21e-06	0.000504
GO_RESPONSE_TO_ORGANIC_CYCLIC_COMPOUND	973	Any process that results in a change in state or activity of a cell or an organism (in terms of movement, secretion, enzyme production, gene expression, etc.) as a result of an organic cyclic compound stimulus. [GOC:ef]	30	0.0308	5.37e-06	0.000515
GO_EMBRYONIC_MORPHOGENESIS	592	The process in which anatomical structures are generated and organized during the embryonic phase. The embryonic phase begins with zygote formation. The end of the embryonic phase is organism-specific. For example, it would be at birth for mammals, larval hatching for insects and seed dormancy in plants. [GOC:jid, GOC:mtg_sensu]	22	0.0372	5.81e-06	0.000551
GO_TUBE_MORPHOGENESIS	928	The process in which the anatomical structures of a tube are generated and organized. Epithelial and endothelial tubes transport gases, liquids and cells from one site to another and form the basic structure of many organs and tissues, with tube shape and organization varying from the single-celled excretory organ in Caenorhabditis elegans to the branching trees of the mammalian kidney and insect…	29	0.0312	5.98e-06	0.000561
GO_CYTOSKELETAL_PROTEIN_BINDING	980	Interacting selectively and non-covalently with any protein component of any cytoskeleton (actin, microtubule, or intermediate filament cytoskeleton). [GOC:mah]	30	0.0306	6.17e-06	0.000573
GO_REGULATION_OF_PHOSPHORYLATION	1625	Any process that modulates the frequency, rate or extent of addition of phosphate groups into a molecule. [GOC:jl]	42	0.0258	6.36e-06	0.000585

## Sheet: over-expressed in solid
Gene Set Name	# Genes in Gene Set (K)	Description	# Genes in Overlap (k)	k/K	p-value	FDR q-value					Gene Set Name*	# Genes in Gene Set (K)	Description	# Genes in Overlap (k)	k/K	p-value	FDR q-value			* Enrichment performed after removing genes in the GO_CELL_CYCLE category
GO_CELL_CYCLE	1864	The progression of biochemical and morphological phases and events that occur in a cell during successive cell replication or nuclear replication events. Canonically, the cell cycle comprises the replication and segregation of genetic material followed by the division of the cell, but in endocycles or syncytial cells nuclear replication or nuclear division may not be followed by cell division. [G…	138	0.074	1.02e-93	9.38e-90					GO_IMMUNE_EFFECTOR_PROCESS	1267	Any process of the immune system that can potentially contribute to an immune response. [GO_REF:0000022, GOC:add, GOC:mtg_15nov05, ISBN:0781735149]	39	0.0308	1.27e-20	1.17e-16
GO_MITOTIC_CELL_CYCLE	1030	Progression through the phases of the mitotic cell cycle, the most common eukaryotic cell cycle, which canonically comprises four successive phases called G1, S, G2, and M and includes replication of the genome and the subsequent segregation of chromosomes into daughter cells. In some variant cell cycles nuclear replication or nuclear division may not be followed by cell division, or G1 and G2 ph…	112	0.1087	1.44e-92	6.61e-89					GO_POSITIVE_REGULATION_OF_IMMUNE_SYSTEM_PROCESS	1187	Any process that activates or increases the frequency, rate, or extent of an immune system process. [GOC:add]	36	0.0303	7.63e-19	1.75e-15
GO_CELL_CYCLE_PROCESS	1399	The cellular process that ensures successive accurate and complete genome replication and chromosome segregation. [GOC:isa_complete, GOC:mtg_cell_cycle]	118	0.0843	4.71e-85	1.44e-81					GO_DEFENSE_RESPONSE	1765	Reactions, triggered in response to the presence of a foreign body or the occurrence of an injury, which result in restriction of damage to the organism attacked or prevention/recovery from the infection caused by the attack. [GOC:go_curators]	40	0.0227	1.58e-16	1.81e-13
GO_CELL_DIVISION	598	The process resulting in division and partitioning of components of a cell to form more cells; may or may not be accompanied by the physical separation of a cell into distinct, individually membrane-bounded daughter cells. [GOC:di, GOC:go_curators, GOC:pr]	80	0.1338	5.14e-72	1.18e-68					GO_CYTOKINE_PRODUCTION	808	The appearance of a cytokine due to biosynthesis or secretion following a cellular stimulus, resulting in an increase in its intracellular or extracellular levels. [GOC:add, ISBN:0781735149]	27	0.0334	2.67e-15	1.88e-12
GO_CHROMOSOME_SEGREGATION	324	The process in which genetic material, in the form of chromosomes, is organized into specific structures and then physically separated and apportioned to two or more sets. In eukaryotes, chromosome segregation begins with the condensation of chromosomes, includes chromosome separation, and ends when chromosomes have completed movement to the spindle poles. [GOC:jl, GOC:mah, GOC:mtg_cell_cycle, GO…	62	0.1914	1.68e-65	3.09e-62					GO_SECRETION	1680	The controlled release of a substance by a cell or a tissue. [GOC:ai]	43	0.0256	1.03e-19	4.76e-16
GO_ORGANELLE_FISSION	450	The creation of two or more organelles by division of one organelle. [GOC:jid]	68	0.1511	1.33e-64	2.04e-61					GO_RESPONSE_TO_BIOTIC_STIMULUS	1567	Any process that results in a change in state or activity of a cell or an organism (in terms of movement, secretion, enzyme production, gene expression, etc.) as a result of a biotic stimulus, a stimulus caused or produced by a living organism. [GOC:hb]	41	0.0262	3.95e-19	1.21e-15
GO_MITOTIC_NUCLEAR_DIVISION	264	A mitotic cell cycle process comprising the steps by which the nucleus of a eukaryotic cell divides; the process involves condensation of chromosomal DNA into a highly compacted form. Canonically, mitosis produces two daughter nuclei whose chromosome complement is identical to that of the mother cell. [ISBN:0198547684]	55	0.2083	3.24e-60	4.26e-57					GO_REGULATION_OF_IMMUNE_SYSTEM_PROCESS	1670	Any process that modulates the frequency, rate, or extent of an immune system process. [GOC:add]	41	0.0246	3.76e-18	6.91e-15
GO_CHROMOSOME_ORGANIZATION	1223	A process that is carried out at the cellular level that results in the assembly, arrangement of constituent parts, or disassembly of chromosomes, structures composed of a very long molecule of DNA and associated proteins that carries hereditary information. This term covers covalent modifications at the molecular level as well as spatial relationships among the major components of a chromosome. …	87	0.0711	4.92e-55	5.66e-52					GO_BIOLOGICAL_ADHESION	1425	The attachment of a cell or organism to a substrate, another cell, or other organism. Biological adhesion includes intracellular attachment between membrane regions. [GOC:isa_complete]	37	0.026	3.59e-17	5.5e-14
GO_NUCLEAR_CHROMOSOME_SEGREGATION	263	The process in which genetic material, in the form of nuclear chromosomes, is organized into specific structures and then physically separated and apportioned to two or more sets. Nuclear chromosome segregation begins with the condensation of chromosomes, includes chromosome separation, and ends when chromosomes have completed movement to the spindle poles. [GOC:dos]	51	0.1939	4.22e-54	4.31e-51					GO_REGULATION_OF_IMMUNE_RESPONSE	1116	Any process that modulates the frequency, rate or extent of the immune response, the immunological reaction of an organism to an immunogenic stimulus. [GOC:ai]	33	0.0296	5.48e-17	7.2e-14
GO_REGULATION_OF_CELL_CYCLE	1224	Any process that modulates the rate or extent of progression through the cell cycle. [GOC:ai, GOC:dph, GOC:tb]	83	0.0678	9.83e-51	9.04e-48					GO_DEFENSE_RESPONSE_TO_OTHER_ORGANISM	1200	Reactions triggered in response to the presence of another organism that act to protect the cell or organism from damage caused by that organism. [GOC:dos]	33	0.0275	4.47e-16	4.46e-13
GO_SISTER_CHROMATID_SEGREGATION	189	The cell cycle process in which sister chromatids are organized and then physically separated and apportioned to two or more sets. [GOC:ai, GOC:elh]	44	0.2328	1.72e-50	1.43e-47					GO_POSITIVE_REGULATION_OF_MULTICELLULAR_ORGANISMAL_PROCESS	1825	Any process that activates or increases the frequency, rate or extent of an organismal process, any of the processes pertinent to the function of an organism above the cellular level; includes the integrated processes of tissues and organs. [GOC:ai]	40	0.0219	4.85e-16	4.46e-13
GO_MITOTIC_SISTER_CHROMATID_SEGREGATION	151	The cell cycle process in which replicated homologous chromosomes are organized and then physically separated and apportioned to two sets during the mitotic cell cycle. Each replicated chromosome, composed of two sister chromatids, aligns at the cell equator, paired with its homologous partner. One homolog of each morphologic type goes into each of the resulting chromosome sets. [GOC:ai, GOC:jl]	41	0.2715	3.83e-50	2.94e-47					GO_REGULATION_OF_RESPONSE_TO_STRESS	1559	Any process that modulates the frequency, rate or extent of a response to stress. Response to stress is a change in state or activity of a cell or an organism (in terms of movement, secretion, enzyme production, gene expression, etc.) as a result of a disturbance in organismal or cellular homeostasis, usually, but not necessarily, exogenous (e.g. temperature, humidity, ionizing radiation). [GOC:d…	37	0.0237	6.2e-16	5.18e-13
GO_CELL_CYCLE_PHASE_TRANSITION	637	The cell cycle process by which a cell commits to entering the next cell cycle phase. [GOC:mtg_cell_cycle]	63	0.0989	4.89e-48	3.46e-45					GO_CELL_ACTIVATION	1442	A change in the morphology or behavior of a cell resulting from exposure to an activating factor such as a cellular or soluble ligand. [GOC:mgi_curators]	35	0.0243	2.2e-15	1.68e-12
GO_REGULATION_OF_CELL_CYCLE_PROCESS	790	Any process that modulates a cellular process that is involved in the progression of biochemical and morphological phases and events that occur in a cell during successive cell replication or nuclear replication events. [GOC:dph, GOC:tb]	65	0.0823	1.53e-44	1.01e-41					GO_REGULATION_OF_RESPONSE_TO_EXTERNAL_STIMULUS	1124	Any process that modulates the frequency, rate or extent of a response to an external stimulus. [GOC:mah]	31	0.0276	3.58e-15	2.35e-12
GO_REGULATION_OF_MITOTIC_CELL_CYCLE	664	Any process that modulates the rate or extent of progress through the mitotic cell cycle. [GOC:dph, GOC:go_curators, GOC:tb]	58	0.0873	4.03e-41	2.47e-38					GO_CYTOKINE_SECRETION	252	The regulated release of cytokines from a cell. Cytokines are any of a group of proteins that function to control the survival, growth and differentiation of tissues and cells, and which have autocrine and paracrine activity. [GOC:ai, GOC:bf, ISBN:0198599471]	17	0.0675	7.08e-15	4.34e-12
GO_MICROTUBULE_CYTOSKELETON_ORGANIZATION	553	A process that is carried out at the cellular level which results in the assembly, arrangement of constituent parts, or disassembly of cytoskeletal structures comprising microtubules and their associated proteins. [GOC:mah]	51	0.0922	2.66e-37	1.53e-34					GO_CELL_MOTILITY	1758	Any process involved in the controlled self-propelled movement of a cell that results in translocation of the cell from one place to another. [GOC:dgh, GOC:dph, GOC:isa_complete, GOC:mlg]	37	0.021	2.56e-14	1.47e-11
GO_DNA_METABOLIC_PROCESS	925	Any cellular metabolic process involving deoxyribonucleic acid. This is one of the two main types of nucleic acid, consisting of a long, unbranched macromolecule formed from one, or more commonly, two, strands of linked deoxyribonucleotides. [ISBN:0198506732]	61	0.0659	3.29e-36	1.78e-33					GO_POSITIVE_REGULATION_OF_IMMUNE_RESPONSE	895	Any process that activates or increases the frequency, rate or extent of the immune response, the immunological reaction of an organism to an immunogenic stimulus. [GOC:ai]	27	0.0302	3.1e-14	1.68e-11
GO_MICROTUBULE_BASED_PROCESS	752	Any cellular process that depends upon or alters the microtubule cytoskeleton, that part of the cytoskeleton comprising microtubules and their associated proteins. [GOC:mah]	56	0.0745	5.55e-36	2.84e-33					GO_INFLAMMATORY_RESPONSE	765	The immediate defensive reaction (by vertebrate tissue) to infection or injury caused by chemical or physical agents. The process is characterized by local vasodilation, extravasation of plasma into intercellular spaces and accumulation of white blood cells and macrophages. [GO_REF:0000022, GOC:mtg_15nov05, ISBN:0198506732]	25	0.0327	5.12e-14	2.62e-11
GO_MICROTUBULE_CYTOSKELETON_ORGANIZATION_INVOLVED_IN_MITOSIS	134	Any microtubule cytoskeleton organization that is involved in mitosis. [GO_REF:0000060, GOC:TermGenie, PMID:18799626]	30	0.2239	4.29e-34	2.08e-31					GO_INNATE_IMMUNE_RESPONSE	1005	Innate immune responses are defense responses mediated by germline encoded components that directly recognize components of potential pathogens. [GO_REF:0000022, GOC:add, GOC:ebc, GOC:mtg_15nov05, GOC:mtg_sensu]	28	0.0279	6.96e-14	3.37e-11
GO_CELLULAR_RESPONSE_TO_DNA_DAMAGE_STIMULUS	856	Any process that results in a change in state or activity of a cell (in terms of movement, secretion, enzyme production, gene expression, etc.) as a result of a stimulus indicating damage to its DNA from environmental insults or errors during metabolism. [GOC:go_curators]	57	0.0666	4.94e-34	2.27e-31					GO_CELL_ACTIVATION_INVOLVED_IN_IMMUNE_RESPONSE	710	A change in the morphology or behavior of a cell resulting from exposure to an activating factor such as a cellular or soluble ligand, leading to the initiation or perpetuation of an immune response. [GO_REF:0000022, GOC:add, GOC:mtg_15nov05, ISBN:0781735149]	24	0.0338	8.26e-14	3.8e-11
GO_DNA_REPLICATION	267	The cellular metabolic process in which a cell duplicates one or more molecules of DNA. DNA replication begins when specific sequences, known as origins of replication, are recognized and bound by initiation proteins, and ends when the original DNA molecule has been completely duplicated and the copies topologically separated. The unit of replication usually corresponds to the genome of the cell,…	36	0.1348	2.23e-32	9.76e-30					GO_MYELOID_LEUKOCYTE_ACTIVATION	650	A change in the morphology or behavior of a myeloid leukocyte resulting from exposure to an activating factor such as a cellular or soluble ligand. [GOC:add, ISBN:0781735149]	23	0.0354	1.1e-13	4.81e-11
GO_SPINDLE_ORGANIZATION	169	A process that is carried out at the cellular level which results in the assembly, arrangement of constituent parts, or disassembly of the spindle, the array of microtubules and associated molecules that forms between opposite poles of a eukaryotic cell during DNA segregation and serves to move the duplicated chromosomes apart. [GOC:go_curators, GOC:mah]	31	0.1834	2.62e-32	1.06e-29					GO_LEUKOCYTE_MEDIATED_IMMUNITY	872	Any process involved in the carrying out of an immune response by a leukocyte. [GO_REF:0000022, GOC:add, GOC:mtg_15nov05, ISBN:0781735149]	26	0.0298	1.27e-13	5.3e-11
GO_REGULATION_OF_NUCLEAR_DIVISION	187	Any process that modulates the frequency, rate or extent of nuclear division, the partitioning of the nucleus and its genetic information. [GOC:ai]	32	0.1711	2.66e-32	1.06e-29					GO_POSITIVE_REGULATION_OF_CYTOKINE_PRODUCTION	468	Any process that activates or increases the frequency, rate or extent of production of a cytokine. [GOC:add, ISBN:0781735149]	20	0.0427	1.55e-13	6.19e-11
GO_REGULATION_OF_CHROMOSOME_SEGREGATION	103	Any process that modulates the frequency, rate or extent of chromosome segregation, the process in which genetic material, in the form of chromosomes, is organized and then physically separated and apportioned to two or more sets. [GOC:ai]	26	0.2524	3.49e-31	1.34e-28					GO_LOCOMOTION	1984	Self-propelled movement of a cell or organism from one location to another. [GOC:dgh]	38	0.0192	2.01e-13	7.68e-11
GO_REGULATION_OF_CELL_CYCLE_PHASE_TRANSITION	482	Any process that modulates the frequency, rate or extent of cell cycle phase transition. [GOC:mtg_cell_cycle, GOC:TermGenie, PMID:22841721]	43	0.0892	6.75e-31	2.48e-28					GO_NEGATIVE_REGULATION_OF_IMMUNE_SYSTEM_PROCESS	481	Any process that stops, prevents, or reduces the frequency, rate, or extent of an immune system process. [GOC:add]	20	0.0416	2.57e-13	9.44e-11
GO_CELL_CYCLE_CHECKPOINT	217	A cell cycle process that controls cell cycle progression by monitoring the integrity of specific cell cycle events. A cell cycle checkpoint begins with detection of deficiencies or defects and ends with signal transduction. [GOC:mtg_cell_cycle]	32	0.1475	3.76e-30	1.33e-27					GO_NEGATIVE_REGULATION_OF_RESPONSE_TO_STIMULUS	1703	Any process that stops, prevents, or reduces the frequency, rate or extent of a response to a stimulus. Response to stimulus is a change in state or activity of a cell or an organism (in terms of movement, secretion, enzyme production, gene expression, etc.) as a result of a stimulus. [GOC:jid]	35	0.0206	2.85e-13	1.01e-10
GO_NEGATIVE_REGULATION_OF_CELL_CYCLE	637	Any process that stops, prevents or reduces the rate or extent of progression through the cell cycle. [GOC:dph, GOC:go_curators, GOC:tb]	47	0.0738	4.91e-30	1.67e-27					GO_NEGATIVE_REGULATION_OF_MULTICELLULAR_ORGANISMAL_PROCESS	1318	Any process that stops, prevents, or reduces the frequency, rate or extent of an organismal process, the processes pertinent to the function of an organism above the cellular level; includes the integrated processes of tissues and organs. [GOC:ai]	30	0.0228	1.43e-12	4.86e-10
GO_POSITIVE_REGULATION_OF_CELL_CYCLE	391	Any process that activates or increases the rate or extent of progression through the cell cycle. [GOC:go_curators]	39	0.0997	6.44e-30	2.11e-27					GO_REGULATION_OF_SECRETION	824	Any process that modulates the frequency, rate or extent of the controlled release of a substance from a cell or a tissue. [GOC:ai]	24	0.0291	1.96e-12	6.43e-10
GO_MITOTIC_SPINDLE_ORGANIZATION	107	A process that is carried out at the cellular level which results in the assembly, arrangement of constituent parts, or disassembly of the microtubule spindle during a mitotic cell cycle. [GOC:go_curators, GOC:mah]	25	0.2336	4.27e-29	1.35e-26					GO_MYELOID_LEUKOCYTE_MEDIATED_IMMUNITY	549	Any process involved in the carrying out of an immune response by a myeloid leukocyte. [GO_REF:0000022, GOC:add, GOC:mtg_15nov05, ISBN:0781735149]	20	0.0364	2.87e-12	9.11e-10
GO_REPRODUCTION	1457	The production of new individuals that contain some portion of genetic material inherited from one or more parent organisms. [GOC:go_curators, GOC:isa_complete, GOC:jl, ISBN:0198506732]	65	0.0446	1.1e-28	3.38e-26					GO_REGULATION_OF_CELL_ACTIVATION	619	Any process that modulates the frequency, rate or extent of cell activation, the change in the morphology or behavior of a cell resulting from exposure to an activating factor such as a cellular or soluble ligand. [GOC:ai]	21	0.0339	3.05e-12	9.36e-10
GO_CYTOSKELETON_ORGANIZATION	1335	A process that is carried out at the cellular level which results in the assembly, arrangement of constituent parts, or disassembly of cytoskeletal structures. [GOC:dph, GOC:jl, GOC:mah]	62	0.0464	2.78e-28	8.26e-26					GO_REGULATION_OF_CELL_ADHESION	695	Any process that modulates the frequency, rate or extent of attachment of a cell to another cell or to the extracellular matrix. [GOC:mah]	22	0.0317	3.49e-12	1.03e-09
GO_POSITIVE_REGULATION_OF_CELL_CYCLE_PROCESS	297	Any process that increases the rate, frequency or extent of a cellular process that is involved in the progression of biochemical and morphological phases and events that occur in a cell during successive cell replication or nuclear replication events. [GOC:dph, GOC:tb]	34	0.1145	3.41e-28	9.8e-26					GO_REGULATION_OF_MULTI_ORGANISM_PROCESS	777	Any process that modulates the frequency, rate or extent of a multi-organism process, a process in which an organism has an effect on another organism of the same or different species. [GOC:jl]	23	0.0296	4.23e-12	1.22e-09
GO_REGULATION_OF_ORGANELLE_ORGANIZATION	1267	Any process that modulates the frequency, rate or extent of a process involved in the formation, arrangement of constituent parts, or disassembly of an organelle. [GOC:mah]	60	0.0474	8.37e-28	2.33e-25					GO_PEPTIDE_SECRETION	641	The controlled release of a peptide from a cell or a tissue. [GOC:add]	21	0.0328	5.88e-12	1.64e-09
GO_DNA_CONFORMATION_CHANGE	322	A cellular process that results in a change in the spatial configuration of a DNA molecule. A conformation change can bend DNA, or alter the, twist, writhe, or linking number of a DNA molecule. [GOC:mah]	34	0.1056	5.19e-27	1.4e-24					GO_NEGATIVE_REGULATION_OF_LEUKOCYTE_PROLIFERATION	80	Any process that stops, prevents, or reduces the frequency, rate or extent of leukocyte proliferation. [GOC:add, GOC:mah]	10	0.125	6.14e-12	1.66e-09
GO_MITOTIC_CELL_CYCLE_CHECKPOINT	165	A cell cycle checkpoint that ensures accurate chromosome replication and segregation by preventing progression through a mitotic cell cycle until conditions are suitable for the cell to proceed to the next stage. [GOC:mtg_cell_cycle]	27	0.1636	7.28e-27	1.91e-24					GO_RESPONSE_TO_OXYGEN_LEVELS	391	Any process that results in a change in state or activity of a cell or an organism (in terms of movement, secretion, enzyme production, gene expression, etc.) as a result of a stimulus reflecting the presence, absence, or concentration of oxygen. [GOC:BHF, GOC:mah]	17	0.0435	8.52e-12	2.24e-09
GO_DNA_REPAIR	551	The process of restoring DNA after damage. Genomes are subject to damage by chemical and physical agents in the environment (e.g. UV and ionizing radiations, chemical mutagens, fungal and bacterial toxins, etc.) and by free radicals or alkylating agents endogenously generated in metabolism. DNA is also damaged because of errors during its replication. A variety of different DNA repair pathways ha…	41	0.0744	2.08e-26	5.32e-24					GO_EXOCYTOSIS	900	A process of secretion by a cell that results in the release of intracellular molecules (e.g. hormones, matrix proteins) contained within a membrane-bounded vesicle. Exocytosis can occur either by full fusion, when the vesicle collapses into the plasma membrane, or by a kiss-and-run mechanism that involves the formation of a transient contact, a pore, between a granule (for exemple of chromaffin …	24	0.0267	1.23e-11	3.14e-09
GO_CHROMOSOME_SEPARATION	89	The cell cycle process in which paired chromosomes are detached from each other. Chromosome separation begins with the release of cohesin complexes from chromosomes; in budding yeast, this includes the cleavage of cohesin complexes along the chromosome arms, followed by the separation of the centromeric regions. Chromosome separation also includes formation of chromatid axes mediated by condensin…	22	0.2472	2.44e-26	6.06e-24					GO_REGULATION_OF_CELL_DIFFERENTIATION	1881	Any process that modulates the frequency, rate or extent of cell differentiation, the process in which relatively unspecialized cells acquire specialized structural and functional features. [GOC:go_curators]	34	0.0181	2.2e-11	5.47e-09
GO_MEIOTIC_CELL_CYCLE	245	Progression through the phases of the meiotic cell cycle, in which canonically a cell replicates to produce four offspring with half the chromosomal content of the progenitor cell via two nuclear divisions. [GOC:ai]	30	0.1224	7.24e-26	1.75e-23					GO_REGULATION_OF_CELLULAR_COMPONENT_MOVEMENT	1107	Any process that modulates the frequency, rate or extent of the movement of a cellular component. [GOC:ai, GOC:dph, GOC:jl]	26	0.0235	2.63e-11	6.24e-09
GO_DNA_DEPENDENT_DNA_REPLICATION	146	A DNA replication process that uses parental DNA as a template for the DNA-dependent DNA polymerases that synthesize the new strands. [GOC:mah, ISBN:0198506732]	25	0.1712	1.79e-25	4.23e-23					GO_REGULATION_OF_TRANSPORT	1894	Any process that modulates the frequency, rate or extent of the directed movement of substances (such as macromolecules, small molecules, ions) into, out of or within a cell, or between cells, by means of some agent such as a transporter or pore. [GOC:ai]	34	0.018	2.65e-11	6.24e-09
GO_MEIOTIC_CELL_CYCLE_PROCESS	187	A process that is part of the meiotic cell cycle. [GO_REF:0000060, GOC:mtg_cell_cycle, GOC:TermGenie]	27	0.1444	2.4e-25	5.51e-23					GO_RESPONSE_TO_CYTOKINE	1210	Any process that results in a change in state or activity of a cell or an organism (in terms of movement, secretion, enzyme production, gene expression, etc.) as a result of a cytokine stimulus. [GOC:sl]	27	0.0223	3.32e-11	7.63e-09
GO_REGULATION_OF_CHROMOSOME_SEPARATION	62	Any process that modulates the frequency, rate or extent of chromosome separation. [GO_REF:0000058, GOC:bhm, GOC:TermGenie, PMID:21795393]	19	0.3065	6.37e-25	1.43e-22					GO_REGULATION_OF_CELL_POPULATION_PROLIFERATION	1716	Any process that modulates the frequency, rate or extent of cell proliferation. [GOC:jl]	32	0.0186	4.25e-11	9.52e-09
GO_NEGATIVE_REGULATION_OF_CELL_CYCLE_PROCESS	356	Any process that decreases the rate, frequency or extent of a cellular process that is involved in the progression of biochemical and morphological phases and events that occur in a cell during successive cell replication or nuclear replication events. [GOC:dph, GOC:tb]	33	0.0927	2.02e-24	4.42e-22					GO_REGULATION_OF_DEFENSE_RESPONSE	804	Any process that modulates the frequency, rate or extent of a defense response. [GOC:mah]	22	0.0274	5.76e-11	1.26e-08
GO_REGULATION_OF_SISTER_CHROMATID_SEGREGATION	80	Any process that modulates the frequency, rate or extent of sister chromatid segregation. [GOC:mah]	20	0.25	3.65e-24	7.81e-22					GO_REGULATION_OF_PEPTIDE_SECRETION	511	Any process that modulates the frequency, rate, or extent of peptide secretion. [GOC:add]	18	0.0352	6.43e-11	1.38e-08
GO_METAPHASE_ANAPHASE_TRANSITION_OF_CELL_CYCLE	56	The cell cycle process in which a cell progresses from metaphase to anaphase as part of the cell cycle. [GOC:mtg_cell_cycle]	18	0.3214	4.14e-24	8.65e-22					GO_REGULATION_OF_IMMUNE_EFFECTOR_PROCESS	455	Any process that modulates the frequency, rate, or extent of an immune effector process. [GOC:add]	17	0.0374	9.05e-11	1.89e-08
GO_NEGATIVE_REGULATION_OF_MITOTIC_CELL_CYCLE	339	Any process that stops, prevents or reduces the rate or extent of progression through the mitotic cell cycle. [GOC:dph, GOC:go_curators, GOC:tb]	32	0.0944	5.91e-24	1.21e-21					GO_POSITIVE_REGULATION_OF_CELL_ACTIVATION	394	Any process that activates or increases the frequency, rate or extent of activation. [GOC:ai]	16	0.0406	9.8e-11	2e-08
GO_CELL_CYCLE_G1_S_PHASE_TRANSITION	299	The cell cycle process by which a cell in G1 phase commits to S phase. [GOC:mtg_cell_cycle]	30	0.1003	2.7e-23	5.39e-21					GO_GRANULOCYTE_MIGRATION	142	The movement of a granulocyte within or between different tissues and organs of the body. [GOC:cvs, PMID:24163421, PMID:24193336]	11	0.0775	1.05e-10	2.09e-08
GO_DOUBLE_STRAND_BREAK_REPAIR	251	The repair of double-strand breaks in DNA via homologous and nonhomologous mechanisms to reform a continuous DNA helix. [GOC:elh]	28	0.1116	4.4e-23	8.61e-21					GO_LEUKOCYTE_CELL_CELL_ADHESION	343	The attachment of a leukocyte to another cell via adhesion molecules. [GOC:go_curators]	15	0.0437	1.38e-10	2.71e-08
GO_DNA_RECOMBINATION	288	Any process in which a new genotype is formed by reassortment of genes resulting in gene combinations different from those that were present in the parents. In eukaryotes genetic recombination can occur by chromosome assortment, intrachromosomal recombination, or nonreciprocal interchromosomal recombination. Interchromosomal recombination occurs by crossing over. In bacteria it may occur by genet…	29	0.1007	1.34e-22	2.57e-20					GO_NEGATIVE_REGULATION_OF_CELL_ADHESION	294	Any process that stops, prevents, or reduces the frequency, rate or extent of cell adhesion. [GOC:go_curators]	14	0.0476	1.92e-10	3.67e-08
GO_REGULATION_OF_CHROMOSOME_ORGANIZATION	347	Any process that modulates the frequency, rate or extent of a process involved in the formation, arrangement of constituent parts, or disassembly of a chromosome. [GOC:mah]	31	0.0893	1.61e-22	3.01e-20					GO_RESPONSE_TO_MOLECULE_OF_BACTERIAL_ORIGIN	358	Any process that results in a change in state or activity of an organism (in terms of movement, secretion, enzyme production, gene expression, etc.) as a result of a stimulus by molecules of bacterial origin such as peptides derived from bacterial flagellin. [GOC:rl, GOC:sm]	15	0.0419	2.51e-10	4.7e-08
GO_CELL_CYCLE_G2_M_PHASE_TRANSITION	271	The cell cycle process by which a cell in G2 phase commits to M phase. [GOC:jl, GOC:mtg_cell_cycle]	28	0.1033	3.66e-22	6.73e-20					GO_NEGATIVE_REGULATION_OF_DEVELOPMENTAL_PROCESS	1047	Any process that stops, prevents or reduces the rate or extent of development, the biological process whose specific outcome is the progression of an organism over time from an initial condition (e.g. a zygote, or a young adult) to a later condition (e.g. a multicellular animal or an aged adult). [GOC:ai]	24	0.0229	2.66e-10	4.9e-08
GO_POSITIVE_REGULATION_OF_MITOTIC_CELL_CYCLE	164	Any process that activates or increases the rate or extent of progression through the mitotic cell cycle. [GOC:dph, GOC:go_curators, GOC:tb]	23	0.1402	1.82e-21	3.28e-19					GO_RESPONSE_TO_BACTERIUM	711	Any process that results in a change in state or activity of a cell or an organism (in terms of movement, secretion, enzyme production, gene expression, etc.) as a result of a stimulus from a bacterium. [GOC:hb]	20	0.0281	2.82e-10	5.08e-08
GO_PROTEIN_PHOSPHORYLATION	1994	The process of introducing a phosphate group on to a protein. [GOC:hb]	65	0.0326	2.9e-21	5.12e-19					GO_ACTIVATION_OF_IMMUNE_RESPONSE	720	Any process that initiates an immune response. [GO_REF:0000022, GOC:add, GOC:mtg_15nov05, ISBN:0781735149]	20	0.0278	3.51e-10	6.2e-08
GO_REGULATION_OF_PROTEIN_MODIFICATION_PROCESS	1880	Any process that modulates the frequency, rate or extent of the covalent alteration of one or more amino acid residues within a protein. [GOC:mah, GOC:tb]	63	0.0335	3.27e-21	5.67e-19					GO_POSITIVE_REGULATION_OF_SIGNALING	1869	Any process that activates, maintains or increases the frequency, rate or extent of a signaling process. [GOC:mtg_signal]	32	0.0171	3.63e-10	6.3e-08
GO_RECOMBINATIONAL_REPAIR	136	A DNA repair process that involves the exchange, reciprocal or nonreciprocal, of genetic material between the broken DNA molecule and a homologous region of DNA. [GOC:elh]	21	0.1544	1.32e-20	2.24e-18					GO_EXTRACELLULAR_STRUCTURE_ORGANIZATION	373	A process that is carried out at the cellular level which results in the assembly, arrangement of constituent parts, or disassembly of structures in the space external to the outermost structure of a cell. For cells without external protective or external encapsulating structures this refers to space outside of the plasma membrane, and also covers the host cell environment outside an intracellula…	15	0.0402	4.41e-10	7.44e-08
GO_NEGATIVE_REGULATION_OF_CHROMOSOME_SEGREGATION	45	Any process that stops, prevents, or reduces the frequency, rate or extent of chromosome segregation, the process in which genetic material, in the form of chromosomes, is organized and then physically separated and apportioned to two or more sets. [GOC:ai]	15	0.3333	1.41e-20	2.36e-18					GO_POSITIVE_REGULATION_OF_TRANSPORT	984	Any process that activates or increases the frequency, rate or extent of the directed movement of substances (such as macromolecules, small molecules, ions) into, out of or within a cell, or between cells, by means of some agent such as a transporter or pore. [GOC:ai]	23	0.0234	4.45e-10	7.44e-08
GO_REGULATION_OF_PHOSPHORUS_METABOLIC_PROCESS	1823	Any process that modulates the frequency, rate or extent of the chemical reactions and pathways involving phosphorus or compounds containing phosphorus. [GOC:ai]	61	0.0335	1.67e-20	2.74e-18					GO_MYELOID_LEUKOCYTE_MIGRATION	212	The movement of a myeloid leukocyte within or between different tissues and organs of the body. [GOC:cvs, PMID:22342843, PMID:24157461]	12	0.0566	5.56e-10	9.13e-08
GO_NEGATIVE_REGULATION_OF_CELL_CYCLE_PHASE_TRANSITION	267	Any process that stops, prevents or reduces the frequency, rate or extent of cell cycle phase transition. [GOC:mtg_cell_cycle, GOC:TermGenie, PMID:22841721]	26	0.0974	5.24e-20	8.45e-18					GO_REGULATION_OF_RESPONSE_TO_BIOTIC_STIMULUS	522	Any process that modulates the frequency, rate, or extent of a response to biotic stimulus. [GOC:add]	17	0.0326	7.37e-10	1.19e-07
GO_NEGATIVE_REGULATION_OF_CHROMOSOME_ORGANIZATION	146	Any process that stops, prevents or reduces the frequency, rate or extent of chromosome organization. [GOC:obol]	21	0.1438	6.09e-20	9.66e-18					GO_REGULATION_OF_LEUKOCYTE_PROLIFERATION	225	Any process that modulates the frequency, rate or extent of leukocyte proliferation. [GOC:add, GOC:mah]	12	0.0533	1.1e-09	1.74e-07
GO_REGULATION_OF_CELL_POPULATION_PROLIFERATION	1716	Any process that modulates the frequency, rate or extent of cell proliferation. [GOC:jl]	58	0.0338	1.06e-19	1.65e-17					GO_REGULATION_OF_PROTEIN_LOCALIZATION	1037	Any process that modulates the frequency, rate or extent of any process in which a protein is transported to, or maintained in, a specific location. [GOC:dph, GOC:mah, GOC:tb]	23	0.0222	1.21e-09	1.89e-07
GO_REGULATION_OF_PHOSPHORYLATION	1625	Any process that modulates the frequency, rate or extent of addition of phosphate groups into a molecule. [GOC:jl]	56	0.0345	2.08e-19	3.18e-17					GO_POSITIVE_REGULATION_OF_DEVELOPMENTAL_PROCESS	1428	Any process that activates or increases the rate or extent of development, the biological process whose specific outcome is the progression of an organism over time from an initial condition (e.g. a zygote, or a young adult) to a later condition (e.g. a multicellular animal or an aged adult). [GOC:ai]	27	0.0189	1.26e-09	1.93e-07
GO_ATTACHMENT_OF_SPINDLE_MICROTUBULES_TO_KINETOCHORE	33	The process in which spindle microtubules become physically associated with the proteins making up the kinetochore complex. [GOC:vw, PMID:10322137]	13	0.3939	3.91e-19	5.9e-17					GO_DECIDUALIZATION	24	The cellular and vascular changes occurring in the endometrium of the pregnant uterus just after the onset of blastocyst implantation. This process involves the proliferation and differentiation of the fibroblast-like endometrial stromal cells into large, polyploid decidual cells that eventually form the maternal component of the placenta. [ISBN:0721662544, PMID:11133685]	6	0.25	1.4e-09	2.1e-07
GO_DRUG_BINDING	1724	Interacting selectively and non-covalently with a drug, any naturally occurring or synthetic substance, other than a nutrient, that, when administered or applied to an organism, affects the structure or functioning of the organism; in particular, any such substance used in the diagnosis, prevention, or treatment of disease. [GOC:jl, ISBN:0198506732]	57	0.0331	6.34e-19	9.4e-17					GO_MULTI_MULTICELLULAR_ORGANISM_PROCESS	231	A multicellular organism process which involves another multicellular organism of the same or different species. [GOC:jl]	12	0.0519	1.48e-09	2.19e-07
GO_REGULATION_OF_CELL_CYCLE_G2_M_PHASE_TRANSITION	214	Any signalling pathway that modulates the activity of a cell cycle cyclin-dependent protein kinase to modulate the switch from G2 phase to M phase of the cell cycle. [GO_REF:0000058, GOC:jl, GOC:TermGenie]	23	0.1075	8.43e-19	1.23e-16					GO_POSITIVE_REGULATION_OF_CELL_POPULATION_PROLIFERATION	960	Any process that activates or increases the rate or extent of cell proliferation. [GOC:go_curators]	22	0.0229	1.58e-09	2.3e-07
GO_NEGATIVE_REGULATION_OF_NUCLEAR_DIVISION	60	Any process that stops, prevents, or reduces the frequency, rate or extent of nuclear division, the partitioning of the nucleus and its genetic information. [GOC:ai]	15	0.25	1.94e-18	2.79e-16					GO_CYTOKINE_MEDIATED_SIGNALING_PATHWAY	791	A series of molecular signals initiated by the binding of a cytokine to a receptor on the surface of a cell, and ending with regulation of a downstream cellular process, e.g. transcription. [GOC:mah, GOC:signaling, PMID:19295629]	20	0.0253	1.76e-09	2.53e-07
GO_DNA_REPLICATION_INITIATION	37	The process in which DNA-dependent DNA replication is started; this begins with the ATP dependent loading of an initiator complex onto the DNA, this is followed by DNA melting and helicase activity. In bacteria, the gene products that enable the helicase activity are loaded after the initial melting and in archaea and eukaryotes, the gene products that enable the helicase activity are inactive wh…	13	0.3514	2.36e-18	3.29e-16					GO_POSITIVE_REGULATION_OF_CYTOKINE_SECRETION	141	Any process that activates or increases the frequency, rate or extent of the regulated release of cytokines from a cell. [GOC:ai]	10	0.0709	1.79e-09	2.53e-07
GO_NEGATIVE_REGULATION_OF_METAPHASE_ANAPHASE_TRANSITION_OF_CELL_CYCLE	37	Any process that stops, prevents or reduces the frequency, rate or extent of metaphase/anaphase transition of cell cycle. [GOC:mtg_cell_cycle, GOC:TermGenie]	13	0.3514	2.36e-18	3.29e-16					GO_FEMALE_PREGNANCY	191	The set of physiological processes that allow an embryo or foetus to develop within the body of a female animal. It covers the time from fertilization of a female ovum by a male spermatozoon until birth. [ISBN:0192800825]	11	0.0576	2.47e-09	3.41e-07
GO_DNA_INTEGRITY_CHECKPOINT	158	A cell cycle process that controls cell cycle progression in response to changes in DNA structure by monitoring the integrity of the DNA. The DNA integrity checkpoint begins with detection of DNA damage, defects in DNA structure or DNA replication, and progresses through signal transduction and ends with cell cycle effector processes. [GOC:mtg_cell_cycle]	20	0.1266	6.32e-18	8.68e-16					GO_POSITIVE_REGULATION_OF_RESPONSE_TO_EXTERNAL_STIMULUS	643	Any process that activates, maintains or increases the rate of a response to an external stimulus. [GOC:mah]	18	0.028	2.48e-09	3.41e-07
GO_ADENYL_NUCLEOTIDE_BINDING	1541	Interacting selectively and non-covalently with adenyl nucleotides, any compound consisting of adenosine esterified with (ortho)phosphate. [ISBN:0198506732]	52	0.0337	1.16e-17	1.57e-15					GO_RESPONSE_TO_OXYGEN_CONTAINING_COMPOUND	1698	Any process that results in a change in state or activity of a cell or an organism (in terms of movement, secretion, enzyme production, gene expression, etc.) as a result of an oxygen-containing compound stimulus. [GOC:pr, GOC:TermGenie]	29	0.0171	2.87e-09	3.89e-07
GO_NEGATIVE_REGULATION_OF_CELLULAR_COMPONENT_ORGANIZATION	724	Any process that stops, prevents, or reduces the frequency, rate or extent of a process involved in the formation, arrangement of constituent parts, or disassembly of cell structures, including the plasma membrane and any external encapsulating structures such as the cell wall and cell envelope. [GOC:ai]	36	0.0497	1.5e-17	2e-15					GO_POSITIVE_REGULATION_OF_SECRETION	431	Any process that activates or increases the frequency, rate or extent of the controlled release of a substance from a cell or a tissue. [GOC:ai]	15	0.0348	3.15e-09	4.2e-07
GO_REGULATION_OF_TRANSFERASE_ACTIVITY	976	Any process that modulates the frequency, rate or extent of transferase activity, the catalysis of the transfer of a group, e.g. a methyl group, glycosyl group, acyl group, phosphorus-containing, or other groups, from one compound (generally regarded as the donor) to another compound (generally regarded as the acceptor). Transferase is the systematic name for any enzyme of EC class 2. [EC:2.-.-.-…	41	0.042	2.8e-17	3.67e-15					GO_LEUKOCYTE_MIGRATION	502	The movement of a leukocyte within or between different tissues and organs of the body. [GOC:add, ISBN:0781735149, PMID:14680625, PMID:14708592, PMID:7507411, PMID:8600538]	16	0.0319	3.23e-09	4.25e-07
GO_POSITIVE_REGULATION_OF_CELL_CYCLE_PHASE_TRANSITION	106	Any process that activates or increases the frequency, rate or extent of cell cycle phase transition. [GOC:mtg_cell_cycle, GOC:TermGenie, PMID:22841721]	17	0.1604	3.26e-17	4.22e-15					GO_POSITIVE_REGULATION_OF_DEFENSE_RESPONSE	514	Any process that activates or increases the frequency, rate or extent of a defense response. [GOC:mah]	16	0.0311	4.51e-09	5.84e-07
GO_METAPHASE_PLATE_CONGRESSION	57	The alignment of chromosomes at the metaphase plate (spindle equator), a plane halfway between the poles of the spindle. [GOC:ai]	14	0.2456	3.56e-17	4.54e-15					GO_POSITIVE_REGULATION_OF_CELL_CELL_ADHESION	259	Any process that activates or increases the rate or extent of cell adhesion to another cell. [GOC:isa_complete]	12	0.0463	5.36e-09	6.85e-07
GO_SPINDLE_ASSEMBLY	107	The aggregation, arrangement and bonding together of a set of components to form the spindle, the array of microtubules and associated molecules that serves to move duplicated chromosomes apart. [GOC:ai, GOC:expert_rg, GOC:mtg_sensu, GOC:tb]	17	0.1589	3.85e-17	4.85e-15					GO_REGULATION_OF_T_CELL_ACTIVATION	318	Any process that modulates the frequency, rate or extent of T cell activation. [GOC:ai]	13	0.0409	5.48e-09	6.89e-07
GO_MEIOTIC_CHROMOSOME_SEGREGATION	90	The process in which genetic material, in the form of chromosomes, is organized into specific structures and then physically separated and apportioned to two or more sets during M phase of the meiotic cell cycle. [GOC:ai, GOC:mah]	16	0.1778	5.04e-17	6.26e-15					GO_REGULATION_OF_ESTABLISHMENT_OF_PROTEIN_LOCALIZATION	767	Any process that modulates the frequency, rate or extent of the directed movement of a protein to a specific location. [GOC:BHF, GOC:mah]	19	0.0248	6.38e-09	7.93e-07
GO_DNA_DEPENDENT_ATPASE_ACTIVITY	109	Catalysis of the reaction: ATP + H2O = ADP + phosphate; this reaction requires the presence of single- or double-stranded DNA, and it drives another reaction. [GOC:jl]	17	0.156	5.33e-17	6.53e-15					GO_NEUTROPHIL_MIGRATION	119	The movement of a neutrophil within or between different tissues and organs of the body. [PMID:1826836]	9	0.0756	6.72e-09	8.19e-07
GO_CHROMOSOME_LOCALIZATION	76	Any process in which a chromosome is transported to, or maintained in, a specific location. [GOC:ai]	15	0.1974	9.2e-17	1.11e-14					GO_RESPONSE_TO_ABIOTIC_STIMULUS	1235	Any process that results in a change in state or activity of a cell or an organism (in terms of movement, secretion, enzyme production, gene expression, etc.) as a result of an abiotic (not derived from living organisms) stimulus. [GOC:hb]	24	0.0194	6.77e-09	8.19e-07
GO_ATPASE_ACTIVITY	438	Catalysis of the reaction: ATP + H2O = ADP + phosphate + 2 H+. May or may not be coupled to another reaction. [EC:3.6.1.3, GOC:jl]	28	0.0639	1.27e-16	1.52e-14					GO_RESPONSE_TO_VIRUS	328	Any process that results in a change in state or activity of a cell or an organism (in terms of movement, secretion, enzyme production, gene expression, etc.) as a result of a stimulus from a virus. [GOC:hb]	13	0.0396	7.92e-09	9.45e-07
GO_MEIOSIS_I_CELL_CYCLE_PROCESS	118	A process that contributes to the first meiotic division. The first meiotic division is the reductive division resulting in the separation of homologous chromosome pairs. [PMID:29385397]	17	0.1441	2.13e-16	2.51e-14					GO_CARBOHYDRATE_BINDING	270	Interacting selectively and non-covalently with any carbohydrate, which includes monosaccharides, oligosaccharides and polysaccharides as well as substances derived from monosaccharides by reduction of the carbonyl group (alditols), by oxidation of one or more hydroxy groups to afford the corresponding aldehydes, ketones, or carboxylic acids, or by replacement of one or more hydroxy group(s) by a…	12	0.0444	8.53e-09	1.01e-06
GO_REGULATION_OF_RESPONSE_TO_STRESS	1559	Any process that modulates the frequency, rate or extent of a response to stress. Response to stress is a change in state or activity of a cell or an organism (in terms of movement, secretion, enzyme production, gene expression, etc.) as a result of a disturbance in organismal or cellular homeostasis, usually, but not necessarily, exogenous (e.g. temperature, humidity, ionizing radiation). [GOC:d…	50	0.0321	4.04e-16	4.7e-14					GO_POSITIVE_REGULATION_OF_MULTI_ORGANISM_PROCESS	540	Any process that activates or increases the frequency, rate or extent of a multi-organism process, a process in which an organism has an effect on another organism of the same or different species. [GOC:jl]	16	0.0296	9.03e-09	1.05e-06
GO_CYTOKINESIS	170	The division of the cytoplasm and the plasma membrane of a cell and its partitioning into two daughter cells. [GOC:mtg_cell_cycle]	19	0.1118	4.56e-16	5.24e-14					GO_T_CELL_ACTIVATION	468	The change in morphology and behavior of a mature or immature T cell resulting from exposure to a mitogen, cytokine, chemokine, cellular ligand, or an antigen for which it is specific. [GOC:mgi_curators, ISBN:0781735149]	15	0.0321	9.48e-09	1.09e-06
GO_POSITIVE_REGULATION_OF_CELL_POPULATION_PROLIFERATION	960	Any process that activates or increases the rate or extent of cell proliferation. [GOC:go_curators]	39	0.0406	5.33e-16	6.05e-14					GO_POSITIVE_REGULATION_OF_LEUKOCYTE_CELL_CELL_ADHESION	219	Any process that activates or increases the frequency, rate or extent of leukocyte cell-cell adhesion. [GO_REF:0000058, GOC:BHF, GOC:rl, GOC:TermGenie, PMID:21106532]	11	0.0502	1.03e-08	1.16e-06
GO_POSITIVE_REGULATION_OF_MULTICELLULAR_ORGANISMAL_PROCESS	1825	Any process that activates or increases the frequency, rate or extent of an organismal process, any of the processes pertinent to the function of an organism above the cellular level; includes the integrated processes of tissues and organs. [GOC:ai]	54	0.0296	6.8e-16	7.62e-14					GO_POSITIVE_REGULATION_OF_CELL_ADHESION	401	Any process that activates or increases the frequency, rate or extent of cell adhesion. [GOC:go_curators]	14	0.0349	1.03e-08	1.16e-06
GO_RIBONUCLEOTIDE_BINDING	1893	Interacting selectively and non-covalently with a ribonucleotide, any compound consisting of a ribonucleoside that is esterified with (ortho)phosphate or an oligophosphate at any hydroxyl group on the ribose moiety. [GOC:mah]	55	0.0291	7.6e-16	8.42e-14					GO_POSITIVE_REGULATION_OF_TUMOR_NECROSIS_FACTOR_SUPERFAMILY_CYTOKINE_PRODUCTION	88	Any process that activates or increases the frequency, rate or extent of tumor necrosis factor superfamily cytokine production. [GO_REF:0000058, GOC:TermGenie, PMID:24187568]	8	0.0909	1.1e-08	1.22e-06
GO_CATALYTIC_ACTIVITY_ACTING_ON_DNA	205	Catalytic activity that acts to modify DNA. [GOC:pdt]	20	0.0976	1.09e-15	1.2e-13					GO_LEUKOCYTE_CHEMOTAXIS	224	The movement of a leukocyte in response to an external stimulus. [GOC:add, GOC:jl]	11	0.0491	1.3e-08	1.42e-06
GO_DNA_HELICASE_ACTIVITY	73	Catalysis of the reaction: ATP + H2O = ADP + phosphate; this reaction drives the unwinding of the DNA helix. [EC:3.6.4.12, GOC:jl]	14	0.1918	1.52e-15	1.64e-13					GO_REGULATION_OF_PHOSPHORUS_METABOLIC_PROCESS	1823	Any process that modulates the frequency, rate or extent of the chemical reactions and pathways involving phosphorus or compounds containing phosphorus. [GOC:ai]	29	0.0159	1.38e-08	1.49e-06
GO_ESTABLISHMENT_OF_ORGANELLE_LOCALIZATION	406	The directed movement of an organelle to a specific location. [GOC:ai]	26	0.064	1.55e-15	1.66e-13					GO_REGULATION_OF_CELL_CELL_ADHESION	411	Any process that modulates the frequency, rate or extent of attachment of a cell to another cell. [GOC:isa_complete]	14	0.0341	1.41e-08	1.5e-06
GO_DNA_PACKAGING	210	Any process in which DNA and associated proteins are formed into a compact, orderly structure. [GOC:mah, ISBN:0815316194]	20	0.0952	1.74e-15	1.84e-13					GO_NEGATIVE_REGULATION_OF_LEUKOCYTE_CELL_CELL_ADHESION	131	Any process that stops, prevents or reduces the frequency, rate or extent of leukocyte cell-cell adhesion. [GO_REF:0000058, GOC:BHF, GOC:rl, GOC:TermGenie, PMID:21106532]	9	0.0687	1.56e-08	1.65e-06
GO_DNA_GEOMETRIC_CHANGE	114	The process in which a transformation is induced in the geometry of a DNA double helix, resulting in a change in twist, writhe, or both, but with no change in linking number. Includes the unwinding of double-stranded DNA by helicases. [GOC:mah]	16	0.1404	2.53e-15	2.64e-13					GO_SIGNALING_RECEPTOR_BINDING	1611	Interacting selectively and non-covalently with one or more specific sites on a receptor molecule, a macromolecule that undergoes combination with a hormone, neurotransmitter, drug or intracellular messenger to initiate a change in cell function. [GOC:bf, GOC:ceb, ISBN:0198506732]	27	0.0168	1.6e-08	1.66e-06
GO_ORGANELLE_LOCALIZATION	622	Any process in which an organelle is transported to, and/or maintained in, a specific location. [GOC:ai]	31	0.0498	2.79e-15	2.88e-13					GO_MATERNAL_PLACENTA_DEVELOPMENT	35	Maternally driven process whose specific outcome is the progression of the placenta over time, from its formation to the mature structure. The placenta is an organ of metabolic interchange between fetus and mother, partly of embryonic origin and partly of maternal origin. [GOC:add, ISBN:068340007X]	6	0.1714	1.61e-08	1.66e-06
GO_MULTI_ORGANISM_REPRODUCTIVE_PROCESS	1016	A biological process that directly contributes to the process of producing new individuals, involving another organism. [GOC:jl]	39	0.0384	3.37e-15	3.44e-13					GO_POSITIVE_REGULATION_OF_CELL_DIFFERENTIATION	1000	Any process that activates or increases the frequency, rate or extent of cell differentiation. [GOC:go_curators]	21	0.021	1.72e-08	1.76e-06
GO_POSITIVE_REGULATION_OF_MOLECULAR_FUNCTION	1781	Any process that activates or increases the rate or extent of a molecular function, an elemental biological activity occurring at the molecular level, such as catalysis or binding. [GO:jl]	52	0.0292	4.32e-15	4.37e-13					GO_LYMPHOCYTE_ACTIVATION	736	A change in morphology and behavior of a lymphocyte resulting from exposure to a specific antigen, mitogen, cytokine, chemokine, cellular ligand, or soluble factor. [GOC:mgi_curators, ISBN:0781735149]	18	0.0245	1.98e-08	2e-06
GO_POSITIVE_REGULATION_OF_PROTEIN_METABOLIC_PROCESS	1724	Any process that activates or increases the frequency, rate or extent of the chemical reactions and pathways involving a protein. [GOC:ai]	51	0.0296	4.93e-15	4.92e-13					GO_POSITIVE_REGULATION_OF_PEPTIDE_SECRETION	292	Any process that activates or increases the frequency, rate, or extent of peptide secretion. [GOC:add]	12	0.0411	2.03e-08	2.03e-06
GO_POSITIVE_REGULATION_OF_CATALYTIC_ACTIVITY	1429	Any process that activates or increases the activity of an enzyme. [GOC:ebc, GOC:jl, GOC:tb, GOC:vw]	46	0.0322	6.14e-15	6.07e-13					GO_POSITIVE_REGULATION_OF_T_CELL_PROLIFERATION	96	Any process that activates or increases the rate or extent of T cell proliferation. [GOC:ai]	8	0.0833	2.21e-08	2.17e-06
GO_NEGATIVE_REGULATION_OF_ORGANELLE_ORGANIZATION	394	Any process that decreases the frequency, rate or extent of a process involved in the formation, arrangement of constituent parts, or disassembly of an organelle. [GOC:dph, GOC:tb]	25	0.0635	6.83e-15	6.68e-13					GO_REGULATION_OF_INTRACELLULAR_SIGNAL_TRANSDUCTION	1863	Any process that modulates the frequency, rate or extent of intracellular signal transduction. [GOC:dph, GOC:signaling, GOC:tb, GOC:TermGenie]	29	0.0156	2.22e-08	2.17e-06
GO_RESPONSE_TO_ABIOTIC_STIMULUS	1235	Any process that results in a change in state or activity of a cell or an organism (in terms of movement, secretion, enzyme production, gene expression, etc.) as a result of an abiotic (not derived from living organisms) stimulus. [GOC:hb]	42	0.034	1.67e-14	1.62e-12					GO_MATERNAL_PROCESS_INVOLVED_IN_FEMALE_PREGNANCY	64	A reproductive process occurring in the mother that allows an embryo or fetus to develop within it. [GOC:dph]	7	0.1094	2.55e-08	2.44e-06
GO_PROTEIN_CONTAINING_COMPLEX_ASSEMBLY	1782	The aggregation, arrangement and bonding together of a set of macromolecules to form a protein-containing complex. [GOC:jl]	51	0.0286	1.8e-14	1.72e-12					GO_MONOCYTE_CHEMOTAXIS	64	The movement of a monocyte in response to an external stimulus. [GOC:add, PMID:11696603, PMID:15173832]	7	0.1094	2.55e-08	2.44e-06
GO_POSITIVE_REGULATION_OF_PROTEIN_MODIFICATION_PROCESS	1247	Any process that activates or increases the frequency, rate or extent of the covalent alteration of one or more amino acid residues within a protein. [GOC:mah, GOC:tb]	42	0.0337	2.31e-14	2.19e-12					GO_RESPONSE_TO_LIPID	930	Any process that results in a change in state or activity of a cell or an organism (in terms of movement, secretion, enzyme production, gene expression, etc.) as a result of a lipid stimulus. [GOC:sl]	20	0.0215	2.62e-08	2.47e-06
GO_TUBULIN_BINDING	341	Interacting selectively and non-covalently with monomeric or multimeric forms of tubulin, including microtubules. [GOC:clt]	23	0.0674	2.33e-14	2.19e-12					GO_NEGATIVE_REGULATION_OF_CELL_DIFFERENTIATION	750	Any process that stops, prevents, or reduces the frequency, rate or extent of cell differentiation. [GOC:go_curators]	18	0.024	2.64e-08	2.47e-06
GO_DEVELOPMENTAL_PROCESS_INVOLVED_IN_REPRODUCTION	974	A developmental process in which a progressive change in the state of some part of an organism specifically contributes to its ability to form offspring. [GOC:dph, GOC:isa_complete]	37	0.038	2.5e-14	2.32e-12					GO_LEUKOCYTE_PROLIFERATION	301	The expansion of a leukocyte population by cell division. [GOC:add]	12	0.0399	2.84e-08	2.63e-06
GO_MICROTUBULE_ORGANIZING_CENTER_ORGANIZATION	133	A process that is carried out at the cellular level which results in the assembly, arrangement of constituent parts, or disassembly of a microtubule organizing center, a structure from which microtubules grow. [GOC:dph, GOC:jl, GOC:mah]	16	0.1203	3.04e-14	2.77e-12					GO_TISSUE_MORPHOGENESIS	670	The process in which the anatomical structures of a tissue are generated and organized. [GOC:dph, GOC:jid]	17	0.0254	2.95e-08	2.71e-06

## Sheet: hyper-methylated in lepidic
Gene Set Name	# Genes in Gene Set (K)	Description	# Genes in Overlap (k)	k/K	p-value	FDR q-value
GO_REGULATION_OF_IMMUNE_SYSTEM_PROCESS	1670	Any process that modulates the frequency, rate, or extent of an immune system process. [GOC:add]	50	0.0299	8.04e-20	7.39e-16
GO_DEFENSE_RESPONSE	1765	Reactions, triggered in response to the presence of a foreign body or the occurrence of an injury, which result in restriction of damage to the organism attacked or prevention/recovery from the infection caused by the attack. [GOC:go_curators]	46	0.0261	5.73e-16	2.63e-12
GO_NEUTROPHIL_MIGRATION	119	The movement of a neutrophil within or between different tissues and organs of the body. [PMID:1826836]	11	0.0924	3.72e-10	1.63e-07
GO_RESPONSE_TO_CHEMOKINE	96	Any process that results in a change in state or activity of a cell or an organism (in terms of movement, secretion, enzyme production, gene expression, etc.) as a result of a chemokine stimulus. [PMID:11113082]	8	0.0833	2.2e-07	3.36e-05
GO_RESPONSE_TO_BIOTIC_STIMULUS	1567	Any process that results in a change in state or activity of a cell or an organism (in terms of movement, secretion, enzyme production, gene expression, etc.) as a result of a biotic stimulus, a stimulus caused or produced by a living organism. [GOC:hb]	42	0.0268	4.95e-15	1.52e-11
GO_CELL_ACTIVATION	1442	A change in the morphology or behavior of a cell resulting from exposure to an activating factor such as a cellular or soluble ligand. [GOC:mgi_curators]	40	0.0277	7.89e-15	1.81e-11
GO_BIOLOGICAL_ADHESION	1425	The attachment of a cell or organism to a substrate, another cell, or other organism. Biological adhesion includes intracellular attachment between membrane regions. [GOC:isa_complete]	39	0.0274	2.74e-14	5.03e-11
GO_REGULATION_OF_IMMUNE_RESPONSE	1116	Any process that modulates the frequency, rate or extent of the immune response, the immunological reaction of an organism to an immunogenic stimulus. [GOC:ai]	34	0.0305	7.37e-14	1.06e-10
GO_POSITIVE_REGULATION_OF_MOLECULAR_FUNCTION	1781	Any process that activates or increases the rate or extent of a molecular function, an elemental biological activity occurring at the molecular level, such as catalysis or binding. [GO:jl]	43	0.0241	8.09e-14	1.06e-10
GO_DEFENSE_RESPONSE_TO_OTHER_ORGANISM	1200	Reactions triggered in response to the presence of another organism that act to protect the cell or organism from damage caused by that organism. [GOC:dos]	35	0.0292	1.08e-13	1.24e-10
GO_POSITIVE_REGULATION_OF_CATALYTIC_ACTIVITY	1429	Any process that activates or increases the activity of an enzyme. [GOC:ebc, GOC:jl, GOC:tb, GOC:vw]	37	0.0259	7.1e-13	7.25e-10
GO_REGULATION_OF_HYDROLASE_ACTIVITY	1287	Any process that modulates the frequency, rate or extent of hydrolase activity, the catalysis of the hydrolysis of various bonds, e.g. C-O, C-N, C-C, phosphoric anhydride bonds, etc. Hydrolase is the systematic name for any enzyme of EC class 3. [EC:3.-.-.-, GOC:ai]	35	0.0272	7.99e-13	7.35e-10
GO_POSITIVE_REGULATION_OF_IMMUNE_SYSTEM_PROCESS	1187	Any process that activates or increases the frequency, rate, or extent of an immune system process. [GOC:add]	33	0.0278	2.13e-12	1.78e-09
GO_MOLECULAR_FUNCTION_REGULATOR	1812	A molecular function that modulates the activity of a gene product or complex. Examples include enzyme regulators and channel regulators. [GOC:dos, GOC:pt]	40	0.0221	1.08e-11	7.61e-09
GO_REGULATION_OF_TRANSPORT	1894	Any process that modulates the frequency, rate or extent of the directed movement of substances (such as macromolecules, small molecules, ions) into, out of or within a cell, or between cells, by means of some agent such as a transporter or pore. [GOC:ai]	41	0.0216	1.05e-11	7.61e-09
GO_IMMUNE_EFFECTOR_PROCESS	1267	Any process of the immune system that can potentially contribute to an immune response. [GO_REF:0000022, GOC:add, GOC:mtg_15nov05, ISBN:0781735149]	33	0.026	1.21e-11	7.93e-09
GO_LEUKOCYTE_MIGRATION	502	The movement of a leukocyte within or between different tissues and organs of the body. [GOC:add, ISBN:0781735149, PMID:14680625, PMID:14708592, PMID:7507411, PMID:8600538]	21	0.0418	1.87e-11	1.15e-08
GO_LOCOMOTION	1984	Self-propelled movement of a cell or organism from one location to another. [GOC:dgh]	41	0.0207	4.38e-11	2.52e-08
GO_CELL_MOTILITY	1758	Any process involved in the controlled self-propelled movement of a cell that results in translocation of the cell from one place to another. [GOC:dgh, GOC:dph, GOC:isa_complete, GOC:mlg]	38	0.0216	6.93e-11	3.75e-08
GO_INNATE_IMMUNE_RESPONSE	1005	Innate immune responses are defense responses mediated by germline encoded components that directly recognize components of potential pathogens. [GO_REF:0000022, GOC:add, GOC:ebc, GOC:mtg_15nov05, GOC:mtg_sensu]	28	0.0279	1.08e-10	5.53e-08
GO_ENZYME_REGULATOR_ACTIVITY	1036	Binds to and modulates the activity of an enzyme. [GOC:dph, GOC:mah, GOC:tb]	28	0.027	2.15e-10	1.04e-07
GO_POSITIVE_REGULATION_OF_HYDROLASE_ACTIVITY	767	Any process that activates or increases the frequency, rate or extent of hydrolase activity, the catalysis of the hydrolysis of various bonds. [GOC:ai]	24	0.0313	2.55e-10	1.17e-07
GO_NEGATIVE_REGULATION_OF_IMMUNE_SYSTEM_PROCESS	481	Any process that stops, prevents, or reduces the frequency, rate, or extent of an immune system process. [GOC:add]	19	0.0395	4.6e-10	1.88e-07
GO_REGULATION_OF_CELL_DIFFERENTIATION	1881	Any process that modulates the frequency, rate or extent of cell differentiation, the process in which relatively unspecialized cells acquire specialized structural and functional features. [GOC:go_curators]	38	0.0202	4.7e-10	1.88e-07
GO_LYMPHOCYTE_ACTIVATION	736	A change in morphology and behavior of a lymphocyte resulting from exposure to a specific antigen, mitogen, cytokine, chemokine, cellular ligand, or soluble factor. [GOC:mgi_curators, ISBN:0781735149]	23	0.0312	6.3e-10	2.36e-07
GO_NEGATIVE_REGULATION_OF_MULTICELLULAR_ORGANISMAL_PROCESS	1318	Any process that stops, prevents, or reduces the frequency, rate or extent of an organismal process, the processes pertinent to the function of an organism above the cellular level; includes the integrated processes of tissues and organs. [GOC:ai]	31	0.0235	6.42e-10	2.36e-07
GO_POSITIVE_REGULATION_OF_IMMUNE_RESPONSE	895	Any process that activates or increases the frequency, rate or extent of the immune response, the immunological reaction of an organism to an immunogenic stimulus. [GOC:ai]	25	0.0279	1.09e-09	3.86e-07
GO_MYELOID_LEUKOCYTE_ACTIVATION	650	A change in the morphology or behavior of a myeloid leukocyte resulting from exposure to an activating factor such as a cellular or soluble ligand. [GOC:add, ISBN:0781735149]	21	0.0323	2.02e-09	6.64e-07
GO_POSITIVE_REGULATION_OF_PHOSPHORUS_METABOLIC_PROCESS	1146	Any process that increases the frequency, rate or extent of the chemical reactions and pathways involving phosphorus or compounds containing phosphorus. [GOC:dph, GOC:tb]	28	0.0244	2.02e-09	6.64e-07
GO_ACTIVATION_OF_IMMUNE_RESPONSE	720	Any process that initiates an immune response. [GO_REF:0000022, GOC:add, GOC:mtg_15nov05, ISBN:0781735149]	22	0.0306	2.28e-09	6.98e-07
GO_POSITIVE_REGULATION_OF_CELL_DIFFERENTIATION	1000	Any process that activates or increases the frequency, rate or extent of cell differentiation. [GOC:go_curators]	26	0.026	2.22e-09	6.98e-07
GO_GRANULOCYTE_MIGRATION	142	The movement of a granulocyte within or between different tissues and organs of the body. [GOC:cvs, PMID:24163421, PMID:24193336]	11	0.0775	2.47e-09	7.33e-07
GO_REGULATION_OF_PHOSPHORUS_METABOLIC_PROCESS	1823	Any process that modulates the frequency, rate or extent of the chemical reactions and pathways involving phosphorus or compounds containing phosphorus. [GOC:ai]	36	0.0197	2.6e-09	7.46e-07
GO_LEUKOCYTE_CHEMOTAXIS	224	The movement of a leukocyte in response to an external stimulus. [GOC:add, GOC:jl]	13	0.058	2.99e-09	8.33e-07
GO_REGULATION_OF_INTRACELLULAR_SIGNAL_TRANSDUCTION	1863	Any process that modulates the frequency, rate or extent of intracellular signal transduction. [GOC:dph, GOC:signaling, GOC:tb, GOC:TermGenie]	36	0.0193	4.57e-09	1.24e-06
GO_REGULATION_OF_CELL_ACTIVATION	619	Any process that modulates the frequency, rate or extent of cell activation, the change in the morphology or behavior of a cell resulting from exposure to an activating factor such as a cellular or soluble ligand. [GOC:ai]	20	0.0323	4.95e-09	1.27e-06
GO_POSITIVE_REGULATION_OF_SIGNALING	1869	Any process that activates, maintains or increases the frequency, rate or extent of a signaling process. [GOC:mtg_signal]	36	0.0193	4.97e-09	1.27e-06
GO_REGULATION_OF_PROTEIN_MODIFICATION_PROCESS	1880	Any process that modulates the frequency, rate or extent of the covalent alteration of one or more amino acid residues within a protein. [GOC:mah, GOC:tb]	36	0.0191	5.78e-09	1.44e-06
GO_REGULATION_OF_CELL_ADHESION	695	Any process that modulates the frequency, rate or extent of attachment of a cell to another cell or to the extracellular matrix. [GOC:mah]	21	0.0302	6.5e-09	1.57e-06
GO_PROTEIN_PHOSPHORYLATION	1994	The process of introducing a phosphate group on to a protein. [GOC:hb]	37	0.0186	7.92e-09	1.87e-06
GO_CELL_CELL_ADHESION	847	The attachment of one cell to another cell via adhesion molecules. [GOC:dos]	23	0.0272	8.87e-09	2.04e-06
GO_POSITIVE_REGULATION_OF_MULTICELLULAR_ORGANISMAL_PROCESS	1825	Any process that activates or increases the frequency, rate or extent of an organismal process, any of the processes pertinent to the function of an organism above the cellular level; includes the integrated processes of tissues and organs. [GOC:ai]	35	0.0192	9.29e-09	2.08e-06
GO_POSITIVE_REGULATION_OF_GTPASE_ACTIVITY	402	Any process that activates or increases the activity of a GTPase. [GOC:jl, GOC:mah]	16	0.0398	1.02e-08	2.22e-06
GO_POSITIVE_REGULATION_OF_PROTEIN_MODIFICATION_PROCESS	1247	Any process that activates or increases the frequency, rate or extent of the covalent alteration of one or more amino acid residues within a protein. [GOC:mah, GOC:tb]	28	0.0225	1.25e-08	2.67e-06
GO_CELL_CHEMOTAXIS	306	The directed movement of a motile cell guided by a specific chemical concentration gradient. Movement may be towards a higher concentration (positive chemotaxis) or towards a lower concentration (negative chemotaxis). [GOC:dph]	14	0.0458	1.53e-08	3.13e-06
GO_LEUKOCYTE_MEDIATED_IMMUNITY	872	Any process involved in the carrying out of an immune response by a leukocyte. [GO_REF:0000022, GOC:add, GOC:mtg_15nov05, ISBN:0781735149]	23	0.0264	1.51e-08	3.13e-06
GO_POSITIVE_REGULATION_OF_INTRACELLULAR_SIGNAL_TRANSDUCTION	1026	Any process that activates or increases the frequency, rate or extent of intracellular signal transduction. [GOC:BHF, GOC:dph, GOC:signaling, GOC:tb, GOC:TermGenie]	25	0.0244	1.65e-08	3.3e-06
GO_IMMUNE_RESPONSE_REGULATING_SIGNALING_PATHWAY	674	The cascade of processes by which a signal interacts with a receptor, causing a change in the level or activity of a second messenger or other downstream target, and ultimately leading to the activation, perpetuation, or inhibition of an immune response. [GOC:add, ISBN:0781735149, PMID:15771571]	20	0.0297	2.03e-08	3.98e-06
GO_POSITIVE_REGULATION_OF_PROTEIN_METABOLIC_PROCESS	1724	Any process that activates or increases the frequency, rate or extent of the chemical reactions and pathways involving a protein. [GOC:ai]	33	0.0191	2.7e-08	5.17e-06
GO_REGULATION_OF_LEUKOCYTE_DIFFERENTIATION	276	Any process that modulates the frequency, rate or extent of leukocyte differentiation. [GOC:add, GOC:TermGenie]	13	0.0471	3.59e-08	6.74e-06
GO_RESPONSE_TO_BACTERIUM	711	Any process that results in a change in state or activity of a cell or an organism (in terms of movement, secretion, enzyme production, gene expression, etc.) as a result of a stimulus from a bacterium. [GOC:hb]	20	0.0281	4.87e-08	8.95e-06
GO_POSITIVE_REGULATION_OF_DEVELOPMENTAL_PROCESS	1428	Any process that activates or increases the rate or extent of development, the biological process whose specific outcome is the progression of an organism over time from an initial condition (e.g. a zygote, or a young adult) to a later condition (e.g. a multicellular animal or an aged adult). [GOC:ai]	29	0.0203	5.89e-08	1.06e-05
GO_TAXIS	652	The directed movement of a motile cell or organism in response to an external stimulus. [GOC:jl, ISBN:0192801023]	19	0.0291	6.17e-08	1.09e-05
GO_LEUKOCYTE_CELL_CELL_ADHESION	343	The attachment of a leukocyte to another cell via adhesion molecules. [GOC:go_curators]	14	0.0408	6.34e-08	1.1e-05
GO_CYTOKINE_PRODUCTION	808	The appearance of a cytokine due to biosynthesis or secretion following a cellular stimulus, resulting in an increase in its intracellular or extracellular levels. [GOC:add, ISBN:0781735149]	21	0.026	8.42e-08	1.43e-05
GO_REGULATION_OF_GTPASE_ACTIVITY	477	Any process that modulates the rate of GTP hydrolysis by a GTPase. [GOC:jl, GOC:mah]	16	0.0335	1.07e-07	1.79e-05
GO_PHAGOCYTOSIS	364	A vesicle-mediated transport process that results in the engulfment of external particulate material by phagocytes and their delivery to the lysosome. The particles are initially contained within phagocytic vacuoles (phagosomes), which then fuse with primary lysosomes to effect digestion of the particles. [ISBN:0198506732]	14	0.0385	1.31e-07	2.15e-05
GO_MYELOID_LEUKOCYTE_MIGRATION	212	The movement of a myeloid leukocyte within or between different tissues and organs of the body. [GOC:cvs, PMID:22342843, PMID:24157461]	11	0.0519	1.56e-07	2.51e-05
GO_REGULATION_OF_LYMPHOCYTE_ACTIVATION	491	Any process that modulates the frequency, rate or extent of lymphocyte activation. [GOC:ai]	16	0.0326	1.58e-07	2.51e-05
GO_SECRETION	1680	The controlled release of a substance by a cell or a tissue. [GOC:ai]	31	0.0185	1.66e-07	2.59e-05
GO_CELL_ACTIVATION_INVOLVED_IN_IMMUNE_RESPONSE	710	A change in the morphology or behavior of a cell resulting from exposure to an activating factor such as a cellular or soluble ligand, leading to the initiation or perpetuation of an immune response. [GO_REF:0000022, GOC:add, GOC:mtg_15nov05, ISBN:0781735149]	19	0.0268	2.28e-07	3.44e-05
GO_POSITIVE_REGULATION_OF_RESPONSE_TO_EXTERNAL_STIMULUS	643	Any process that activates, maintains or increases the rate of a response to an external stimulus. [GOC:mah]	18	0.028	2.5e-07	3.7e-05
GO_REGULATION_OF_PHOSPHORYLATION	1625	Any process that modulates the frequency, rate or extent of addition of phosphate groups into a molecule. [GOC:jl]	30	0.0185	2.65e-07	3.87e-05
GO_REGULATION_OF_PEPTIDE_SECRETION	511	Any process that modulates the frequency, rate, or extent of peptide secretion. [GOC:add]	16	0.0313	2.7e-07	3.88e-05
GO_ENZYME_ACTIVATOR_ACTIVITY	520	Binds to and increases the activity of an enzyme. [GOC:dph, GOC:mah, GOC:tb]	16	0.0308	3.41e-07	4.82e-05
GO_REGULATION_OF_RESPONSE_TO_STRESS	1559	Any process that modulates the frequency, rate or extent of a response to stress. Response to stress is a change in state or activity of a cell or an organism (in terms of movement, secretion, enzyme production, gene expression, etc.) as a result of a disturbance in organismal or cellular homeostasis, usually, but not necessarily, exogenous (e.g. temperature, humidity, ionizing radiation). [GOC:d…	29	0.0186	3.66e-07	5.09e-05
GO_POSITIVE_REGULATION_OF_CELL_ADHESION	401	Any process that activates or increases the frequency, rate or extent of cell adhesion. [GOC:go_curators]	14	0.0349	4.22e-07	5.79e-05
GO_ION_TRANSPORT	1692	The directed movement of charged atoms or small charged molecules into, out of or within a cell, or between cells, by means of some agent such as a transporter or pore. [GOC:ai]	30	0.0177	6.16e-07	8.33e-05
GO_CELLULAR_RESPONSE_TO_ORGANIC_CYCLIC_COMPOUND	614	Any process that results in a change in state or activity of a cell (in terms of movement, secretion, enzyme production, gene expression, etc.) as a result of an organic cyclic compound stimulus. [GOC:mah]	17	0.0277	6.31e-07	8.41e-05
GO_POSITIVE_REGULATION_OF_MAPK_CASCADE	548	Any process that activates or increases the frequency, rate or extent of signal transduction mediated by the MAPK cascade. [GOC:go_curators]	16	0.0292	6.81e-07	8.94e-05
GO_INFLAMMATORY_RESPONSE	765	The immediate defensive reaction (by vertebrate tissue) to infection or injury caused by chemical or physical agents. The process is characterized by local vasodilation, extravasation of plasma into intercellular spaces and accumulation of white blood cells and macrophages. [GO_REF:0000022, GOC:mtg_15nov05, ISBN:0198506732]	19	0.0248	7.01e-07	9.08e-05
GO_SIGNALING_RECEPTOR_BINDING	1611	Interacting selectively and non-covalently with one or more specific sites on a receptor molecule, a macromolecule that undergoes combination with a hormone, neurotransmitter, drug or intracellular messenger to initiate a change in cell function. [GOC:bf, GOC:ceb, ISBN:0198506732]	29	0.018	7.11e-07	9.08e-05
GO_REGULATION_OF_ION_TRANSPORT	699	Any process that modulates the frequency, rate or extent of the directed movement of charged atoms or small charged molecules into, out of or within a cell, or between cells, by means of some agent such as a transporter or pore. [GOC:jl]	18	0.0258	8.31e-07	0.000105
GO_NEUROGENESIS	1625	Generation of cells within the nervous system. [GO_REF:0000021, GOC:cls, GOC:curators, GOC:dgh, GOC:dph, GOC:jid, GOC:mtg_15jun06]	29	0.0178	8.46e-07	0.000105
GO_POSITIVE_REGULATION_OF_CELL_DEVELOPMENT	562	Any process that increases the rate, frequency or extent of the progression of the cell over time, from its formation to the mature structure. Cell development does not include the steps involved in committing a cell to a specific fate. [GOC:BHF, GOC:dph, GOC:tb]	16	0.0285	9.46e-07	0.000116
GO_IMMUNE_RESPONSE_REGULATING_CELL_SURFACE_RECEPTOR_SIGNALING_PATHWAY	500	A series of molecular signals initiated by the binding of an extracellular ligand to a receptor on the surface of the target cell capable of activating, perpetuating, or inhibiting an immune response. [GOC:add, ISBN:0781735149, PMID:15771571]	15	0.03	1.09e-06	0.000132
GO_PEPTIDE_SECRETION	641	The controlled release of a peptide from a cell or a tissue. [GOC:add]	17	0.0265	1.14e-06	0.000136
GO_REGULATION_OF_T_CELL_ACTIVATION	318	Any process that modulates the frequency, rate or extent of T cell activation. [GOC:ai]	12	0.0377	1.28e-06	0.00015
GO_CELLULAR_RESPONSE_TO_OXYGEN_CONTAINING_COMPOUND	1208	Any process that results in a change in state or activity of a cell (in terms of movement, secretion, enzyme production, gene expression, etc.) as a result of an oxygen-containing compound stimulus. [GOC:pr, GOC:TermGenie]	24	0.0199	1.29e-06	0.00015
GO_REGULATION_OF_RESPONSE_TO_EXTERNAL_STIMULUS	1124	Any process that modulates the frequency, rate or extent of a response to an external stimulus. [GOC:mah]	23	0.0205	1.32e-06	0.000152
GO_ADAPTIVE_IMMUNE_RESPONSE	663	An immune response mediated by cells expressing specific receptors for antigen produced through a somatic diversification process, and allowing for an enhanced secondary response to subsequent exposures to the same antigen (immunological memory). [GO_REF:0000022, GOC:add, GOC:mtg_15nov05, ISBN:0781735149]	17	0.0256	1.79e-06	0.000203
GO_POSITIVE_REGULATION_OF_LEUKOCYTE_CELL_CELL_ADHESION	219	Any process that activates or increases the frequency, rate or extent of leukocyte cell-cell adhesion. [GO_REF:0000058, GOC:BHF, GOC:rl, GOC:TermGenie, PMID:21106532]	10	0.0457	1.84e-06	0.000206
GO_POSITIVE_REGULATION_OF_CELL_ACTIVATION	394	Any process that activates or increases the frequency, rate or extent of activation. [GOC:ai]	13	0.033	2.05e-06	0.000224
GO_POSITIVE_REGULATION_OF_TRANSPORT	984	Any process that activates or increases the frequency, rate or extent of the directed movement of substances (such as macromolecules, small molecules, ions) into, out of or within a cell, or between cells, by means of some agent such as a transporter or pore. [GOC:ai]	21	0.0213	2.03e-06	0.000224
GO_T_CELL_ACTIVATION	468	The change in morphology and behavior of a mature or immature T cell resulting from exposure to a mitogen, cytokine, chemokine, cellular ligand, or an antigen for which it is specific. [GOC:mgi_curators, ISBN:0781735149]	14	0.0299	2.59e-06	0.00028
GO_CCR1_CHEMOKINE_RECEPTOR_BINDING	5	Interacting selectively and non-covalently with a CCR1 chemokine receptor. [GOC:mah, GOC:nln]	3	0.6	2.64e-06	0.000282
GO_CELLULAR_RESPONSE_TO_LIPID	615	Any process that results in a change in state or activity of a cell (in terms of movement, secretion, enzyme production, gene expression, etc.) as a result of a lipid stimulus. [GOC:mah]	16	0.026	3.01e-06	0.000318
GO_REGULATION_OF_CELL_CELL_ADHESION	411	Any process that modulates the frequency, rate or extent of attachment of a cell to another cell. [GOC:isa_complete]	13	0.0316	3.25e-06	0.000331
GO_REGULATION_OF_HEMOPOIESIS	477	Any process that modulates the frequency, rate or extent of hemopoiesis. [GO_REF:0000058, GOC:pad, GOC:PARL, GOC:TermGenie, PMID:20080761]	14	0.0294	3.23e-06	0.000331
GO_POSITIVE_REGULATION_OF_NERVOUS_SYSTEM_DEVELOPMENT	547	Any process that activates, maintains or increases the frequency, rate or extent of nervous system development, the origin and formation of nervous tissue. [GOC:ai]	15	0.0274	3.28e-06	0.000331
GO_REGULATION_OF_MAPK_CASCADE	769	Any process that modulates the frequency, rate or extent of signal transduction mediated by the MAP kinase (MAPK) cascade. [GOC:go_curators]	18	0.0234	3.17e-06	0.000331
GO_MYELOID_LEUKOCYTE_MEDIATED_IMMUNITY	549	Any process involved in the carrying out of an immune response by a myeloid leukocyte. [GO_REF:0000022, GOC:add, GOC:mtg_15nov05, ISBN:0781735149]	15	0.0273	3.43e-06	0.000343
GO_REGULATION_OF_PROTEIN_DEPHOSPHORYLATION	139	Any process that modulates the frequency, rate or extent of removal of phosphate groups from a protein. [GOC:bf]	8	0.0576	3.67e-06	0.000363
GO_CELL_CELL_SIGNALING	1665	Any process that mediates the transfer of information from one cell to another. This process includes signal transduction in the receiving cell and, where applicable, release of a ligand and any processes that actively facilitate its transport and presentation to the receiving cell. Examples include signaling via soluble ligands, via cell adhesion molecules and via gap junctions. [GOC:dos, GOC:ma…	28	0.0168	4.11e-06	0.000402
GO_RESPONSE_TO_MOLECULE_OF_BACTERIAL_ORIGIN	358	Any process that results in a change in state or activity of an organism (in terms of movement, secretion, enzyme production, gene expression, etc.) as a result of a stimulus by molecules of bacterial origin such as peptides derived from bacterial flagellin. [GOC:rl, GOC:sm]	12	0.0335	4.33e-06	0.000419
GO_REGULATION_OF_PROTEIN_LOCALIZATION	1037	Any process that modulates the frequency, rate or extent of any process in which a protein is transported to, or maintained in, a specific location. [GOC:dph, GOC:mah, GOC:tb]	21	0.0203	4.56e-06	0.000436
GO_RESPONSE_TO_INTERFERON_GAMMA	198	Any process that results in a change in state or activity of a cell or an organism (in terms of movement, secretion, enzyme production, gene expression, etc.) as a result of an interferon-gamma stimulus. Interferon-gamma is also known as type II interferon. [GOC:add, ISBN:0126896631, PMID:15546383]	9	0.0455	6.28e-06	0.000587
GO_POSITIVE_REGULATION_OF_KINASE_ACTIVITY	577	Any process that activates or increases the frequency, rate or extent of kinase activity, the catalysis of the transfer of a phosphate group, usually from ATP, to a substrate molecule. [GOC:mah]	15	0.026	6.22e-06	0.000587
GO_SIGNAL_TRANSDUCTION_BY_PROTEIN_PHOSPHORYLATION	974	A process in which the transfer of one or more phosphate groups to a substrate transmits a signal to the phosphorylated substrate. [GOC:mtg_signal, GOC:signaling]	20	0.0205	6.32e-06	0.000587
GO_POSITIVE_REGULATION_OF_DEFENSE_RESPONSE	514	Any process that activates or increases the frequency, rate or extent of a defense response. [GOC:mah]	14	0.0272	7.55e-06	0.000694

## Sheet: hyper-methylated in solid
Gene Set Name	# Genes in Gene Set (K)	Description	# Genes in Overlap (k)	k/K	p-value	FDR q-value
GO_BIOLOGICAL_ADHESION	1425	The attachment of a cell or organism to a substrate, another cell, or other organism. Biological adhesion includes intracellular attachment between membrane regions. [GOC:isa_complete]	35	0.0246	3.04e-11	1.4e-07
GO_REGULATION_OF_TRANSPORT	1894	Any process that modulates the frequency, rate or extent of the directed movement of substances (such as macromolecules, small molecules, ions) into, out of or within a cell, or between cells, by means of some agent such as a transporter or pore. [GOC:ai]	37	0.0195	4.4e-09	5.06e-06
GO_NEUROGENESIS	1625	Generation of cells within the nervous system. [GO_REF:0000021, GOC:cls, GOC:curators, GOC:dgh, GOC:dph, GOC:jid, GOC:mtg_15jun06]	33	0.0203	1.32e-08	1e-05
GO_DEVELOPMENTAL_GROWTH	677	The increase in size or mass of an entire organism, a part of an organism or a cell, where the increase in size or mass has the specific outcome of the progression of the organism over time from one condition to another. [GOC:go_curators]	18	0.0266	7.89e-07	0.000181
GO_CELL_CYCLE_ARREST	237	A regulatory process that halts progression through the cell cycle during one of the normal phases (G1, S, G2, M). [GOC:dph, GOC:mah, GOC:tb]	10	0.0422	4.75e-06	0.000683
GO_RESPONSE_TO_OXYGEN_CONTAINING_COMPOUND	1698	Any process that results in a change in state or activity of a cell or an organism (in terms of movement, secretion, enzyme production, gene expression, etc.) as a result of an oxygen-containing compound stimulus. [GOC:pr, GOC:TermGenie]	39	0.023	1.48e-11	1.36e-07
GO_RESPONSE_TO_ENDOGENOUS_STIMULUS	1721	Any process that results in a change in state or activity of a cell or an organism (in terms of movement, secretion, enzyme production, gene expression, etc.) as a result of a stimulus arising within the organism. [GOC:sm]	38	0.0221	8.7e-11	2.67e-07
GO_CELLULAR_RESPONSE_TO_ENDOGENOUS_STIMULUS	1454	Any process that results in a change in state or activity of a cell (in terms of movement, secretion, enzyme production, gene expression, etc.) as a result of a stimulus arising within the organism. [GOC:mah]	33	0.0227	8.71e-10	1.9e-06
GO_POSITIVE_REGULATION_OF_RNA_METABOLIC_PROCESS	1710	Any process that activates or increases the frequency, rate or extent of the chemical reactions and pathways involving RNA. [GOC:ai]	36	0.0211	1.04e-09	1.9e-06
GO_LOCOMOTION	1984	Self-propelled movement of a cell or organism from one location to another. [GOC:dgh]	39	0.0197	1.33e-09	2.04e-06
GO_POSITIVE_REGULATION_OF_NUCLEOBASE_CONTAINING_COMPOUND_METABOLIC_PROCESS	1870	Any cellular process that activates or increases the frequency, rate or extent of the chemical reactions and pathways involving nucleobases, nucleosides, nucleotides and nucleic acids. [GOC:go_curators]	37	0.0198	3.14e-09	4.12e-06
GO_ANION_TRANSPORT	634	The directed movement of anions, atoms or small molecules with a net negative charge, into, out of or within a cell, or between cells, by means of some agent such as a transporter or pore. [GOC:ai]	20	0.0315	1.18e-08	1e-05
GO_RESPONSE_TO_ORGANIC_CYCLIC_COMPOUND	973	Any process that results in a change in state or activity of a cell or an organism (in terms of movement, secretion, enzyme production, gene expression, etc.) as a result of an organic cyclic compound stimulus. [GOC:ef]	25	0.0257	1.02e-08	1e-05
GO_RESPONSE_TO_NITROGEN_COMPOUND	1135	Any process that results in a change in state or activity of a cell or an organism (in terms of movement, secretion, enzyme production, gene expression, etc.) as a result of a nitrogen compound stimulus. [GOC:pr, GOC:TermGenie]	27	0.0238	1.27e-08	1e-05
GO_REGULATION_OF_CELL_POPULATION_PROLIFERATION	1716	Any process that modulates the frequency, rate or extent of cell proliferation. [GOC:jl]	34	0.0198	1.42e-08	1e-05
GO_LIPID_METABOLIC_PROCESS	1405	The chemical reactions and pathways involving lipids, compounds soluble in an organic solvent but not, or sparingly, in an aqueous solvent. Includes fatty acids; neutral fats, other fatty-acid esters, and soaps; long-chain (fatty) alcohols and waxes; sphingoids and other long-chain bases; glycolipids, phospholipids and sphingolipids; and carotenes, polyprenols, sterols, terpenes and other isopren…	30	0.0214	2.13e-08	1.31e-05
GO_INTRACELLULAR_TRANSPORT	1741	The directed movement of substances within a cell. [GOC:ai]	34	0.0195	2.02e-08	1.31e-05
GO_MYELOID_CELL_DIFFERENTIATION	420	The process in which a relatively unspecialized myeloid precursor cell acquires the specialized features of any cell of the myeloid leukocyte, megakaryocyte, thrombocyte, or erythrocyte lineages. [GOC:add, ISBN:0781735149]	16	0.0381	2.76e-08	1.34e-05
GO_RESPONSE_TO_GROWTH_FACTOR	732	Any process that results in a change in state or activity of a cell or an organism (in terms of movement, secretion, enzyme production, gene expression, etc.) as a result of a growth factor stimulus. [GOC:BHF, GOC:mah]	21	0.0287	2.58e-08	1.34e-05
GO_CYTOSKELETON_ORGANIZATION	1335	A process that is carried out at the cellular level which results in the assembly, arrangement of constituent parts, or disassembly of cytoskeletal structures. [GOC:dph, GOC:jl, GOC:mah]	29	0.0217	2.58e-08	1.34e-05
GO_IDENTICAL_PROTEIN_BINDING	1760	Interacting selectively and non-covalently with an identical protein or proteins. [GOC:jl]	34	0.0193	2.62e-08	1.34e-05
GO_SIGNALING_RECEPTOR_BINDING	1611	Interacting selectively and non-covalently with one or more specific sites on a receptor molecule, a macromolecule that undergoes combination with a hormone, neurotransmitter, drug or intracellular messenger to initiate a change in cell function. [GOC:bf, GOC:ceb, ISBN:0198506732]	32	0.0199	3.72e-08	1.71e-05
GO_SIGNAL_TRANSDUCTION_BY_PROTEIN_PHOSPHORYLATION	974	A process in which the transfer of one or more phosphate groups to a substrate transmits a signal to the phosphorylated substrate. [GOC:mtg_signal, GOC:signaling]	24	0.0246	4.48e-08	1.96e-05
GO_POSITIVE_REGULATION_OF_CELLULAR_BIOSYNTHETIC_PROCESS	1988	Any process that activates or increases the frequency, rate or extent of the chemical reactions and pathways resulting in the formation of substances, carried out by individual cells. [GOC:mah]	36	0.0181	4.96e-08	2.07e-05
GO_ACTIN_FILAMENT_BASED_PROCESS	766	Any cellular process that depends upon or alters the actin cytoskeleton, that part of the cytoskeleton comprising actin filaments and their associated proteins. [GOC:mah]	21	0.0274	5.55e-08	2.22e-05
GO_REGULATION_OF_PHOSPHORUS_METABOLIC_PROCESS	1823	Any process that modulates the frequency, rate or extent of the chemical reactions and pathways involving phosphorus or compounds containing phosphorus. [GOC:ai]	34	0.0187	6.09e-08	2.33e-05
GO_CELL_MOTILITY	1758	Any process involved in the controlled self-propelled movement of a cell that results in translocation of the cell from one place to another. [GOC:dgh, GOC:dph, GOC:isa_complete, GOC:mlg]	33	0.0188	8.38e-08	3.08e-05
GO_SECRETION	1680	The controlled release of a substance by a cell or a tissue. [GOC:ai]	32	0.019	9.66e-08	3.42e-05
GO_ENZYME_LINKED_RECEPTOR_PROTEIN_SIGNALING_PATHWAY	1051	Any series of molecular signals initiated by the binding of an extracellular ligand to a receptor on the surface of the target cell, where the receptor possesses catalytic activity or is closely associated with an enzyme such as a protein kinase, and ending with regulation of a downstream cellular process, e.g. transcription. [GOC:mah, GOC:signaling, ISBN:0815316194]	24	0.0228	1.81e-07	6.16e-05
GO_ORGANIC_ANION_TRANSPORT	492	The directed movement of organic anions into, out of or within a cell, or between cells, by means of some agent such as a transporter or pore. Organic anions are atoms or small molecules with a negative charge which contain carbon in covalent linkage. [GOC:ai, GOC:krc]	16	0.0325	2.38e-07	7.5e-05
GO_GROWTH	990	The increase in size or mass of an entire organism, a part of an organism or a cell. [GOC:bf, GOC:ma]	23	0.0232	2.45e-07	7.5e-05
GO_CELL_CYCLE_PROCESS	1399	The cellular process that ensures successive accurate and complete genome replication and chromosome segregation. [GOC:isa_complete, GOC:mtg_cell_cycle]	28	0.02	2.44e-07	7.5e-05
GO_POSITIVE_REGULATION_OF_SIGNALING	1869	Any process that activates, maintains or increases the frequency, rate or extent of a signaling process. [GOC:mtg_signal]	33	0.0177	3.37e-07	0.0001
GO_ION_TRANSPORT	1692	The directed movement of charged atoms or small charged molecules into, out of or within a cell, or between cells, by means of some agent such as a transporter or pore. [GOC:ai]	31	0.0183	3.61e-07	0.000104
GO_REGULATION_OF_PROTEIN_MODIFICATION_PROCESS	1880	Any process that modulates the frequency, rate or extent of the covalent alteration of one or more amino acid residues within a protein. [GOC:mah, GOC:tb]	33	0.0176	3.84e-07	0.000107
GO_REGULATION_OF_CELLULAR_COMPONENT_BIOGENESIS	942	Any process that modulates the frequency, rate or extent of cellular component biogenesis, a process that results in the biosynthesis of constituent macromolecules, assembly, and arrangement of constituent parts of a cellular component. [GOC:jl]	22	0.0234	4.14e-07	0.000112
GO_PROTEIN_PHOSPHORYLATION	1994	The process of introducing a phosphate group on to a protein. [GOC:hb]	34	0.0171	4.88e-07	0.000128
GO_POSITIVE_REGULATION_OF_TRANSCRIPTION_BY_RNA_POLYMERASE_II	1198	Any process that activates or increases the frequency, rate or extent of transcription from an RNA polymerase II promoter. [GOC:go_curators, GOC:txnOH]	25	0.0209	5.26e-07	0.000134
GO_SYNAPTIC_SIGNALING	733	Cell-cell signaling to, from or within a synapse. [GOC:dos]	19	0.0259	5.66e-07	0.000141
GO_REGULATION_OF_CELLULAR_RESPONSE_TO_GROWTH_FACTOR_STIMULUS	292	Any process that modulates the rate, frequency, or extent of a change in state or activity of a cell (in terms of movement, secretion, enzyme production, gene expression, etc.) as a result of a growth factor stimulus. [GOC:tb]	12	0.0411	7.02e-07	0.00017
GO_HOMEOSTATIC_PROCESS	1935	Any biological process involved in the maintenance of an internal steady state. [GOC:jl, ISBN:0395825172]	33	0.0171	7.28e-07	0.000172
GO_CELLULAR_LIPID_METABOLIC_PROCESS	1064	The chemical reactions and pathways involving lipids, as carried out by individual cells. [GOC:jl]	23	0.0216	8.46e-07	0.000185
GO_PROTEIN_DIMERIZATION_ACTIVITY	1315	The formation of a protein dimer, a macromolecular structure consists of two noncovalently associated identical or nonidentical subunits. [ISBN:0198506732]	26	0.0198	8.46e-07	0.000185
GO_CELLULAR_RESPONSE_TO_ORGANIC_CYCLIC_COMPOUND	614	Any process that results in a change in state or activity of a cell (in terms of movement, secretion, enzyme production, gene expression, etc.) as a result of an organic cyclic compound stimulus. [GOC:mah]	17	0.0277	9.29e-07	0.000199
GO_RESPONSE_TO_HORMONE	994	Any process that results in a change in state or activity of a cell or an organism (in terms of movement, secretion, enzyme production, gene expression, etc.) as a result of a hormone stimulus. [GOC:jl]	22	0.0221	1.01e-06	0.00021
GO_REGULATION_OF_MYELOID_CELL_DIFFERENTIATION	252	Any process that modulates the frequency, rate or extent of myeloid cell differentiation. [GOC:go_curators]	11	0.0437	1.14e-06	0.00023
GO_REGULATION_OF_MAPK_CASCADE	769	Any process that modulates the frequency, rate or extent of signal transduction mediated by the MAP kinase (MAPK) cascade. [GOC:go_curators]	19	0.0247	1.15e-06	0.00023
GO_CELLULAR_RESPONSE_TO_HORMONE_STIMULUS	704	Any process that results in a change in state or activity of a cell (in terms of movement, secretion, enzyme production, gene expression, etc.) as a result of a hormone stimulus. [GOC:mah]	18	0.0256	1.37e-06	0.000268
GO_TRANSCRIPTION_REGULATOR_ACTIVITY	1718	A molecular function that controls the rate, timing and/or magnitude of transcription of genetic information. The function of transcriptional regulators is to modulate gene expression at the transcription step so that they are expressed in the right cell at the right time and in the right amount throughout the life of the cell and the organism. [GOC:pg, GOC:txnOH-2018, Wikipedia:Transcription_fac…	30	0.0175	1.51e-06	0.00029
GO_NEURON_DIFFERENTIATION	1365	The process in which a relatively unspecialized cell acquires specialized features of a neuron. [GOC:mah]	26	0.019	1.68e-06	0.000315
GO_NEURON_DEVELOPMENT	1114	The process whose specific outcome is the progression of a neuron over time, from initial commitment of the cell to a specific fate, to the fully functional differentiated cell. [GOC:dph]	23	0.0206	1.83e-06	0.000337
GO_REGULATION_OF_TRANS_SYNAPTIC_SIGNALING	444	Any process that modulates the frequency, rate or extent of trans-synaptic signaling. [GOC:dos]	14	0.0315	1.95e-06	0.00035
GO_CELLULAR_MACROMOLECULE_LOCALIZATION	1930	Any process in which a macromolecule is transported to, and/or maintained in, a specific location at the level of a cell. Localization at the cellular level encompasses movement within the cell, from within the cell to the cell surface, or from one location to another at the surface of a cell. [GOC:mah]	32	0.0166	1.98e-06	0.00035
GO_RESPONSE_TO_STEROID_HORMONE	385	Any process that results in a change in state or activity of a cell or an organism (in terms of movement, secretion, enzyme production, gene expression, etc.) as a result of a steroid hormone stimulus. [GOC:go_curators]	13	0.0338	2.16e-06	0.000368
GO_REGULATION_OF_CELL_DEATH	1748	Any process that modulates the rate or frequency of cell death. Cell death is the specific activation or halting of processes within a cell so that its vital functions markedly cease, rather than simply deteriorating gradually over time, which culminates in cell death. [GOC:dph, GOC:tb]	30	0.0172	2.15e-06	0.000368
GO_ORGANIC_ACID_TRANSPORT	328	The directed movement of organic acids, any acidic compound containing carbon in covalent linkage, into, out of or within a cell, or between cells, by means of some agent such as a transporter or pore. [ISBN:0198506732]	12	0.0366	2.35e-06	0.000394
GO_RESPONSE_TO_OXIDATIVE_STRESS	453	Any process that results in a change in state or activity of a cell or an organism (in terms of movement, secretion, enzyme production, gene expression, etc.) as a result of oxidative stress, a state often resulting from exposure to high levels of reactive oxygen species, e.g. superoxide anions, hydrogen peroxide (H2O2), and hydroxyl radicals. [GOC:jl, PMID:12115731]	14	0.0309	2.46e-06	0.000396
GO_PROTEIN_CONTAINING_COMPLEX_BINDING	1135	Interacting selectively and non-covalently with a macromolecular complex. [GOC:jl]	23	0.0203	2.5e-06	0.000396
GO_CELL_CELL_SIGNALING	1665	Any process that mediates the transfer of information from one cell to another. This process includes signal transduction in the receiving cell and, where applicable, release of a ligand and any processes that actively facilitate its transport and presentation to the receiving cell. Examples include signaling via soluble ligands, via cell adhesion molecules and via gap junctions. [GOC:dos, GOC:ma…	29	0.0174	2.41e-06	0.000396
GO_CELL_CYCLE	1864	The progression of biochemical and morphological phases and events that occur in a cell during successive cell replication or nuclear replication events. Canonically, the cell cycle comprises the replication and segregation of genetic material followed by the division of the cell, but in endocycles or syncytial cells nuclear replication or nuclear division may not be followed by cell division. [G…	31	0.0166	2.73e-06	0.000425
GO_RESPONSE_TO_DRUG	1061	Any process that results in a change in state or activity of a cell or an organism (in terms of movement, secretion, enzyme production, gene expression, etc.) as a result of a drug stimulus. A drug is a substance used in the diagnosis, treatment or prevention of a disease. [GOC:jl]	22	0.0207	2.89e-06	0.000443
GO_NEGATIVE_REGULATION_OF_RESPONSE_TO_STIMULUS	1703	Any process that stops, prevents, or reduces the frequency, rate or extent of a response to a stimulus. Response to stimulus is a change in state or activity of a cell or an organism (in terms of movement, secretion, enzyme production, gene expression, etc.) as a result of a stimulus. [GOC:jid]	29	0.017	3.74e-06	0.000563
GO_REGULATION_OF_PHOSPHORYLATION	1625	Any process that modulates the frequency, rate or extent of addition of phosphate groups into a molecule. [GOC:jl]	28	0.0172	4.46e-06	0.000661
GO_POSITIVE_REGULATION_OF_PROTEIN_METABOLIC_PROCESS	1724	Any process that activates or increases the frequency, rate or extent of the chemical reactions and pathways involving a protein. [GOC:ai]	29	0.0168	4.73e-06	0.000683
GO_RESPONSE_TO_LIPID	930	Any process that results in a change in state or activity of a cell or an organism (in terms of movement, secretion, enzyme production, gene expression, etc.) as a result of a lipid stimulus. [GOC:sl]	20	0.0215	4.86e-06	0.000688
GO_CELL_PROJECTION_ORGANIZATION	1545	A process that is carried out at the cellular level which results in the assembly, arrangement of constituent parts, or disassembly of a prolongation or process extending from a cell, e.g. a flagellum or axon. [GOC:jl, GOC:mah, http://www.cogsci.princeton.edu/~wn/]	27	0.0175	5.18e-06	0.000721
GO_CELLULAR_RESPONSE_TO_NITROGEN_COMPOUND	709	Any process that results in a change in state or activity of a cell (in terms of movement, secretion, enzyme production, gene expression, etc.) as a result of a nitrogen compound stimulus. [GOC:pr, GOC:TermGenie]	17	0.024	6.32e-06	0.000867
GO_CELLULAR_RESPONSE_TO_OXYGEN_CONTAINING_COMPOUND	1208	Any process that results in a change in state or activity of a cell (in terms of movement, secretion, enzyme production, gene expression, etc.) as a result of an oxygen-containing compound stimulus. [GOC:pr, GOC:TermGenie]	23	0.019	6.92e-06	0.000935
GO_RESPONSE_TO_TRANSFORMING_GROWTH_FACTOR_BETA	248	Any process that results in a change in state or activity of a cell or an organism (in terms of movement, secretion, enzyme production, gene expression, etc.) as a result of a transforming growth factor beta stimulus. [GOC:mah]	10	0.0403	7.08e-06	0.000944
GO_NEGATIVE_REGULATION_OF_BIOSYNTHETIC_PROCESS	1673	Any process that stops, prevents, or reduces the rate of the chemical reactions and pathways resulting in the formation of substances. [GOC:go_curators]	28	0.0167	7.65e-06	0.00101
GO_REGULATION_OF_ANATOMICAL_STRUCTURE_SIZE	503	Any process that modulates the size of an anatomical structure. [GOC:dph, GOC:tb]	14	0.0278	8.12e-06	0.00105
GO_TRANSMEMBRANE_RECEPTOR_PROTEIN_TYROSINE_KINASE_SIGNALING_PATHWAY	725	A series of molecular signals initiated by the binding of an extracellular ligand to a receptor on the surface of the target cell where the receptor possesses tyrosine kinase activity, and ending with regulation of a downstream cellular process, e.g. transcription. [GOC:ceb, GOC:signaling]	17	0.0234	8.44e-06	0.00108
GO_POSITIVE_REGULATION_OF_MOLECULAR_FUNCTION	1781	Any process that activates or increases the rate or extent of a molecular function, an elemental biological activity occurring at the molecular level, such as catalysis or binding. [GO:jl]	29	0.0163	8.75e-06	0.0011
GO_KINASE_BINDING	729	Interacting selectively and non-covalently with a kinase, any enzyme that catalyzes the transfer of a phosphate group. [GOC:jl]	17	0.0233	9.06e-06	0.00111
GO_REGULATION_OF_CELL_DIFFERENTIATION	1881	Any process that modulates the frequency, rate or extent of cell differentiation, the process in which relatively unspecialized cells acquire specialized structural and functional features. [GOC:go_curators]	30	0.0159	9.04e-06	0.00111
GO_POSITIVE_REGULATION_OF_PHOSPHORUS_METABOLIC_PROCESS	1146	Any process that increases the frequency, rate or extent of the chemical reactions and pathways involving phosphorus or compounds containing phosphorus. [GOC:dph, GOC:tb]	22	0.0192	9.72e-06	0.00118
GO_MYELOID_LEUKOCYTE_DIFFERENTIATION	208	The process in which a relatively unspecialized myeloid precursor cell acquires the specialized features of any cell of the myeloid leukocyte lineage. [GOC:add, PMID:16551251]	9	0.0433	1.17e-05	0.00136
GO_POSITIVE_REGULATION_OF_PROTEIN_MODIFICATION_PROCESS	1247	Any process that activates or increases the frequency, rate or extent of the covalent alteration of one or more amino acid residues within a protein. [GOC:mah, GOC:tb]	23	0.0184	1.15e-05	0.00136
GO_POSITIVE_REGULATION_OF_CATALYTIC_ACTIVITY	1429	Any process that activates or increases the activity of an enzyme. [GOC:ebc, GOC:jl, GOC:tb, GOC:vw]	25	0.0175	1.16e-05	0.00136
GO_IMMUNE_SYSTEM_DEVELOPMENT	990	The process whose specific outcome is the progression of an organismal system whose objective is to provide calibrated responses by an organism to a potential internal or invasive threat, over time, from its formation to the mature structure. A system is a regularly interacting or interdependent group of organs or tissues that work together to carry out a given biological process. [GOC:add, GOC:d…	20	0.0202	1.21e-05	0.00139
GO_REGULATION_OF_ACTIN_FILAMENT_BASED_PROCESS	387	Any process that modulates the frequency, rate or extent of any cellular process that depends upon or alters the actin cytoskeleton. [GOC:mah]	12	0.031	1.25e-05	0.00142
GO_DNA_BINDING_TRANSCRIPTION_FACTOR_ACTIVITY_RNA_POLYMERASE_II_SPECIFIC	1094	A protein or a member of a complex that interacts selectively and non-covalently with a specific DNA sequence (sometimes referred to as a motif) within the regulatory region of a RNA polymerase II-transcribed gene to modulate transcription. Regulatory regions include promoters (proximal and distal) and enhancers. Genes are transcriptional units. [GOC:txnOH-2018]	21	0.0192	1.56e-05	0.00175
GO_NEGATIVE_REGULATION_OF_CELLULAR_RESPONSE_TO_GROWTH_FACTOR_STIMULUS	166	Any process that decreases the rate, frequency, or extent of a change in state or activity of a cell (in terms of movement, secretion, enzyme production, gene expression, etc.) as a result of a growth factor stimulus. [GOC:BHF]	8	0.0482	1.65e-05	0.00183
GO_RESPONSE_TO_WOUNDING	687	Any process that results in a change in state or activity of a cell or an organism (in terms of movement, secretion, enzyme production, gene expression, etc.) as a result of a stimulus indicating damage to the organism. [GOC:go_curators]	16	0.0233	1.69e-05	0.00185
GO_NEGATIVE_REGULATION_OF_RNA_BIOSYNTHETIC_PROCESS	1280	Any process that stops, prevents or reduces the frequency, rate or extent of RNA biosynthetic process. [GO:jl, GO_REF:0000058, GOC:TermGenie]	23	0.018	1.74e-05	0.00188
GO_ERYTHROCYTE_HOMEOSTASIS	122	Any process of regulating the production and elimination of erythrocytes within an organism. [GOC:add, PMID:10694114, PMID:14754397]	7	0.0574	1.83e-05	0.00194
GO_REGULATION_OF_CELLULAR_COMPONENT_MOVEMENT	1107	Any process that modulates the frequency, rate or extent of the movement of a cellular component. [GOC:ai, GOC:dph, GOC:jl]	21	0.019	1.86e-05	0.00194
GO_NEGATIVE_REGULATION_OF_NUCLEOBASE_CONTAINING_COMPOUND_METABOLIC_PROCESS	1470	Any cellular process that stops, prevents, or reduces the frequency, rate or extent of the chemical reactions and pathways involving nucleobases, nucleosides, nucleotides and nucleic acids. [GOC:go_curators]	25	0.017	1.86e-05	0.00194
GO_PROTEIN_HOMODIMERIZATION_ACTIVITY	854	Interacting selectively and non-covalently with an identical protein to form a homodimer. [GOC:jl]	18	0.0211	1.91e-05	0.00195
GO_REGULATION_OF_HYDROLASE_ACTIVITY	1287	Any process that modulates the frequency, rate or extent of hydrolase activity, the catalysis of the hydrolysis of various bonds, e.g. C-O, C-N, C-C, phosphoric anhydride bonds, etc. Hydrolase is the systematic name for any enzyme of EC class 3. [EC:3.-.-.-, GOC:ai]	23	0.0179	1.89e-05	0.00195
GO_EPITHELIAL_CELL_DIFFERENTIATION	774	The process in which a relatively unspecialized cell acquires specialized features of an epithelial cell, any of the cells making up an epithelium. [GOC:ecd, PMID:11839751]	17	0.022	1.95e-05	0.00197
GO_REGULATION_OF_INTRACELLULAR_SIGNAL_TRANSDUCTION	1863	Any process that modulates the frequency, rate or extent of intracellular signal transduction. [GOC:dph, GOC:signaling, GOC:tb, GOC:TermGenie]	29	0.0156	2.02e-05	0.00201
GO_REGULATION_OF_HEMOPOIESIS	477	Any process that modulates the frequency, rate or extent of hemopoiesis. [GO_REF:0000058, GOC:pad, GOC:PARL, GOC:TermGenie, PMID:20080761]	13	0.0273	2.13e-05	0.00202
GO_POSITIVE_REGULATION_OF_MAPK_CASCADE	548	Any process that activates or increases the frequency, rate or extent of signal transduction mediated by the MAPK cascade. [GOC:go_curators]	14	0.0255	2.1e-05	0.00202
GO_NEGATIVE_REGULATION_OF_CELL_DEATH	1030	Any process that decreases the rate or frequency of cell death. Cell death is the specific activation or halting of processes within a cell so that its vital functions markedly cease, rather than simply deteriorating gradually over time, which culminates in cell death. [GOC:BHF, GOC:dph, GOC:tb]	20	0.0194	2.12e-05	0.00202
GO_EPITHELIUM_DEVELOPMENT	1296	The process whose specific outcome is the progression of an epithelium over time, from its formation to the mature structure. An epithelium is a tissue that covers the internal or external surfaces of an anatomical structure. [GOC:dph, GOC:mtg_lung]	23	0.0177	2.11e-05	0.00202
GO_REGULATION_OF_IMMUNE_SYSTEM_PROCESS	1670	Any process that modulates the frequency, rate, or extent of an immune system process. [GOC:add]	27	0.0162	2.06e-05	0.00202
GO_PROTEIN_CONTAINING_COMPLEX_ASSEMBLY	1782	The aggregation, arrangement and bonding together of a set of macromolecules to form a protein-containing complex. [GOC:jl]	28	0.0157	2.4e-05	0.00225
GO_P38MAPK_CASCADE	52	An intracellular protein kinase cascade containing at least a p38 MAPK, a MAPKK and a MAP3K. The cascade can also contain an additional tier: the upstream MAP4K. The kinases in each tier phosphorylate and activate the kinases in the downstream tier to transmit a signal within a cell. [GOC:signaling, PMID:20811974]	5	0.0962	2.5e-05	0.00232
GO_RIBONUCLEOTIDE_BINDING	1893	Interacting selectively and non-covalently with a ribonucleotide, any compound consisting of a ribonucleoside that is esterified with (ortho)phosphate or an oligophosphate at any hydroxyl group on the ribose moiety. [GOC:mah]	29	0.0153	2.7e-05	0.00248
